# Supplementary material for: Time-Resolved Proteomics of Germinating Spores of Bacillus cereus
Source: Int J Mol Sci. 2022 Nov 6;23(21):13614. doi: 10.3390/ijms232113614 (PMC9658361; doi:10.3390/ijms232113614)
Supplement: Supplementary file 1 [file ijms-23-13614-s001.zip › Time-resolved proteomics of germinating spores of Bacillus cereus_IJMS_supplementary tables.xlsx]

## Sheet: Table S1
Table S1. The limma results.
	Significance compared with T0											log2(fold change)											Adjusted p-value											log2 transformed LFQ intensity
Protein ID	sig_AHA...T0	sig_PHA...T0	sig_T1...T0	sig_T3...T0	sig_T5...T0	sig_T10...T0	sig_T30...T0	sig_T60...T0	sig_T120...T0	sig_T180...T0	sig_T240...T0	AHA...T0	PHA...T0	T1...T0	T3...T0	T5...T0	T10...T0	T30...T0	T60...T0	T120...T0	T180...T0	T240...T0	adj.p_T0_AHA	adj.p_T0_PHA	adj.p_T0_T1	adj.p_T0_T3	adj.p_T0_T5	adj.p_T0_T10	adj.p_T0_T30	adj.p_T0_T60	adj.p_T0_T120	adj.p_T0_T180	adj.p_T0_T240	LFQ intensity AHA-R1	LFQ intensity AHA-R2	LFQ intensity AHA-R3	LFQ intensity PHA-R1	LFQ intensity PHA-R2	LFQ intensity PHA-R3	LFQ intensity T0-R1	LFQ intensity T0-R2	LFQ intensity T0-R3	LFQ intensity T1-R1	LFQ intensity T1-R2	LFQ intensity T1-R3	LFQ intensity T3-R1	LFQ intensity T3-R2	LFQ intensity T3-R3	LFQ intensity T5-R1
Q81I91	+	+	+	+	+		+	+	+	+	+	1.65818	-2.73303	-1.74067	-2.71725	-3.68991	-4.54112	-5.59137	-7.04779	-7.70936	-8.52002	-7.23943	0.0187235	1.43e-09	0.0277458	1.07e-05	3.26e-08	2.11e-10	1.51e-12	8.26e-15	8.67e-16	2.36e-17	2.03e-16	4.59022	5.26697	5.6212	1.20324	0.206307	0.18285	3.71404	4.01193	3.71275	1.7834	2.22069	2.24918	1.02672	0.997845	1.1059	0.149742
Q81C37					+		+	+	+	+	+	2.01992	0.786613	-1.23741	-1.6387	-3.23534	-3.69489	-3.91279	-3.5606	-2.57198	-2.41221	-3.62355	0.0904417	0.717833	0.999831	0.999319	0.00701346	0.000681133	2.29e-05	6.52e-05	0.000590008	0.00110429	2.83e-06	1.87324	0.344809	1.6913	1.02961	-0.872464	-0.660063	-1.16083	-0.932635	0.877954	-1.91916	-1.36831	-1.60369	-1.22987	-2.61169	-2.44657	-4.39917
Q816S4						+	+	+			+	0.419165	-0.534939	-0.0162144	0.165351	0.446649	1.38253	1.32836	1.52329	0.870518	0.581696	1.11761	0.882274	0.000312893	0.999831	0.999319	0.999822	0.00296061	0.000887808	1.94e-05	0.00169559	0.0210395	0.00163817	-2.46881	-2.59645	-2.54705	-3.90074	-3.27869	-4.00754	-2.83234	-2.6301	-2.47247	-2.68599	-2.73485	-2.52614	-2.20687	-3.09277	-2.29574	-1.77851
Q816A4		+				+	+	+	+	+	+	-0.0728696	1.56038	0.239698	0.519468	0.502094	1.53331	4.38423	4.54007	4.02339	3.93606	3.77407	0.648869	0.0131377	0.999831	0.999319	0.999822	0.0411383	1.39e-09	1.29e-10	2.11e-10	1.73e-10	1.46e-09	-0.627249	-2.02624	-1.18806	-0.240698	-0.0619268	0.64846	-0.949638	-1.6275	-0.110905	-1.30149	-0.579785	-0.0511045	-0.272536	-0.974142	-0.0394821	-0.781811
P59717						+	+	+	+	+	+	-0.257324	0.233622	0.117248	-0.259075	0.50706	1.8819	2.98241	3.13409	3.77152	3.49601	3.37055	0.452212	0.437069	0.999831	0.999319	0.999822	0.0052901	1.56e-06	1.33e-07	9.66e-10	2.22e-09	1.8e-08	-3.67608	-4.46005	-4.36558	-3.64901	-5.01052	-3.0817	-3.61278	-4.2656	-2.91647	-3.57006	-3.44468	-3.3918	-4.18652	-4.23386	-3.30822	-3.27799
Q818F3						+	+	+	+	+	+	0.531061	0.154052	0.651124	-0.425178	1.1979	2.75475	4.10089	4.81739	5.51262	3.23362	2.17158	0.859041	0.432972	0.999831	0.999319	0.999822	0.000998177	3.2e-07	2.94e-09	5.87e-11	3.74e-07	0.000402235	-4.62897	-2.63333	-3.74017	-4.71002	-3.60881	-4.52704	-4.35828	-3.80852	-3.49397	-2.90393	-3.60579	-3.16111	-4.09412	-4.44078	-4.55793	-2.32017
Q815K5	+	+				+	+		+	+	+	2.39525	2.65917	1.54872	1.92391	1.66906	3.02305	2.04138	1.53198	4.29453	4.19868	3.72426	0.030599	0.00150609	0.999831	0.999319	0.925695	0.00354038	0.0331437	0.0516691	1.82e-07	1.96e-07	4.04e-06	-2.48105	-3.57496	-4.12823	-3.68911	-3.5362	-2.87954	-5.39608	-5.91474	-5.12428	-4.59465	-3.6623	-3.49544	-3.64336	-3.72194	-3.4546	-4.47641
Q81G97		+					+	+	+	+	+	2.46592	-4.63777	-0.877747	-1.63685	-2.39221	-4.31172	-5.22012	-6.12681	-6.11386	-7.72768	-6.90051	0.0847414	5.14e-07	0.999831	0.999319	0.880151	0.000998177	8.25e-06	3.33e-07	6.92e-08	6.88e-10	3.1e-09	4.6094	5.3375	5.39275	-4.54509	-0.914632	-1.22407	3.01038	2.8481	3.0183	2.19907	1.94178	2.13926	0.934669	1.45753	1.41751	0.416798
Q81G17		+					+	+	+	+	+	0.552351	-6.36722	-0.397633	-0.919629	-1.53023	-3.04282	-6.95163	-7.60968	-7.76812	-8.34358	-6.40733	0.939319	1.1e-07	0.999831	0.999319	0.999822	0.165094	2.09e-06	2.23e-07	3.15e-08	5.8e-09	3.31e-07	2.24517	2.73723	2.93515	-3.89643	-5.35915	-4.29795	2.01965	2.5127	2.66304	1.61553	2.20632	2.2172	0.738301	1.68837	1.85331	0.271271
Q81AG2		+					+	+	+	+	+	1.89294	-3.32067	-1.49701	-2.79077	-1.85616	-2.6262	-3.00298	-3.91737	-4.78862	-4.40243	-4.42389	0.165385	6.16e-06	0.999831	0.11185	0.999822	0.0411383	0.00222516	6e-05	4.64e-07	1.46e-06	5.88e-07	2.34732	1.36366	1.69106	-3.94036	-3.22009	-3.7907	0.0639648	-0.0414724	0.63562	-2.40829	-0.388963	-0.999106	-3.47888	-2.60016	-1.79168	-1.85427
Q818M2		+					+	+	+	+	+	0.716628	-2.08684	0.0418212	-1.13789	-0.949249	-2.47766	-2.61158	-2.09885	-4.49104	-3.10583	-2.63666	0.8199	0.000890511	0.999831	0.999319	0.999822	0.0846282	0.0118871	0.0338075	2e-06	0.000250092	0.000573469	-0.475086	-1.29923	-1.6299	-4.36059	-4.46959	-3.69681	-1.57462	-1.49504	-1.54955	-1.42984	-1.38392	-1.64343	-1.66808	-4.66151	-1.85982	-1.11829
Q81G20							+	+	+	+	+	1.00209	1.88714	-0.444709	-1.46424	-2.08098	-2.34588	-4.08722	-4.19233	-4.71868	-4.06141	-4.09756	0.738566	0.151196	0.999831	0.999319	0.999822	0.541316	0.00151685	0.000712775	2.85e-05	0.000166026	7.54e-05	-0.00787735	0.879625	1.83356	0.403143	2.97457	1.27039	0.0271187	0.496787	0.110041	-0.778401	0.360532	-0.245749	-1.88487	-1.8601	-0.170324	-2.63739
P0A4F2		+					+	+	+	+	+	0.767036	-3.65901	-0.10099	-0.656579	-1.61726	-2.11353	-5.08805	-4.68387	-7.31268	-6.68376	-6.63628	0.794971	4.21e-06	0.999831	0.999319	0.999822	0.313748	4.27e-06	9.4e-06	8.24e-10	2.69e-09	1.6e-09	4.00881	4.20772	4.44206	-0.927805	0.52773	-0.93182	3.35859	3.69656	4.23723	3.26564	4.10289	3.65743	2.61457	2.91282	3.63873	2.31872
Q816S3		+					+	+	+	+	+	0.814486	-1.48882	0.096089	-0.661401	-0.924972	-1.88208	-5.81101	-5.75868	-6.8702	-6.82831	-6.02181	0.666676	0.000741533	0.999831	0.999319	0.999822	0.0846282	2.34e-09	1.4e-09	1.06e-11	5.23e-12	2.59e-11	2.83056	2.72509	2.61345	-0.852066	1.77491	-0.376034	2.1537	2.13966	2.36718	1.70153	2.81023	2.47361	0.806645	2.03511	1.67805	0.925051
Q816A5		+					+	+	+	+	+	0.689255	-2.34044	-0.164221	-0.26398	-1.02261	-1.79201	-3.08422	-2.54781	-4.19083	-6.44648	-2.938	0.829888	0.000298331	0.999831	0.999319	0.999822	0.541316	0.00198123	0.00749912	4.68e-06	2.39e-09	0.000162716	2.31573	2.61008	2.68838	0.235424	0.0112772	-2.43394	2.33815	1.95377	2.18941	1.83409	2.17083	2.02029	1.80545	1.73939	1.98802	1.6476
Q81GM8							+	+	+	+	+	0.489418	-0.332726	0.055776	-0.00247002	-0.352701	-1.79092	-6.01422	-7.40389	-5.99297	-7.68122	-5.44232	0.939319	0.240246	0.999831	0.999319	0.999822	0.604419	3.2e-07	2.75e-09	2.61e-08	1.73e-10	4.59e-08	1.42051	3.17211	3.20373	0.659798	1.82362	2.13414	2.14431	2.64762	2.47106	2.05582	2.75279	2.65827	0.967771	3.39195	2.73933	1.29425
Q81HD9		+					+	+	+	+	+	0.59478	-2.51904	-0.13733	-0.443247	-0.777316	-1.76617	-3.9741	-4.8813	-6.04422	-7.04869	-7.27058	0.827231	2.7e-06	0.999831	0.999319	0.999822	0.0902353	9.14e-07	1.15e-08	5.36e-11	1.3e-12	2.97e-13	6.86064	8.53425	8.87099	4.69927	4.65538	4.8574	7.4835	7.98058	7.95237	7.46925	7.73011	7.84166	6.39394	7.93644	7.59979	6.45444
Q817I4		+					+	+	+	+	+	0.773558	-5.52592	-0.306709	-0.655528	-1.47468	-1.64601	-6.22082	-7.11673	-7.63241	-7.96829	-6.9314	0.666877	5.4e-12	0.999831	0.999319	0.880151	0.10935	1.56e-10	1.02e-11	3.81e-13	7.24e-14	3.22e-13	3.10313	3.26481	3.23525	-2.66506	-3.47415	-3.86836	2.64267	2.68093	2.89381	2.21654	2.6696	2.44772	1.8038	2.30424	1.98627	0.675415
Q812S0							+	+				0.672015	-0.0614077	-0.328813	-0.972809	-1.24085	-1.51585	-1.34043	-1.75422	0.0348155	0.240861	0.562459	0.626351	0.0794934	0.999831	0.999319	0.292496	0.00537436	0.00421654	0.000235631	0.792071	0.370919	0.292305	1.83069	1.66438	1.89988	0.61277	1.04134	0.828218	1.35829	0.990199	1.96532	1.20618	1.02	1.13775	0.596349	0.5811	0.0614071	0.0362968
P0A4F4		+					+	+	+	+	+	1.01973	-4.55709	-0.206609	-0.289715	-0.670236	-1.49515	-3.22034	-4.13781	-5.37996	-6.43097	-6.68432	0.180049	2.26e-14	0.999831	0.999319	0.999822	0.0042267	6.81e-09	4.25e-11	6.51e-14	6.95e-16	1.15e-16	7.51958	8.6075	8.34707	2.16543	2.51647	2.34943	7.34187	7.41812	7.58987	7.55373	7.20095	7.01192	6.49482	7.66736	7.16201	6.37127
Q819S3		+					+	+	+	+	+	-0.64767	-1.85103	0.335955	-0.48429	-0.89166	-1.43634	5.74251	7.96925	8.56194	8.32288	8.13826	0.412065	0.000643563	0.999831	0.999319	0.999822	0.727028	7.69e-08	4.25e-11	1.81e-12	1.33e-12	3.44e-12	-4.44919	-5.1068	-3.04612	-6.74247	-5.95651	-4.22555	-3.4042	-2.93404	-3.38596	-3.53894	-2.79372	-2.34712	-4.83172	-3.50054	-3.00134	-4.079
Q816G1							+	+	+	+	+	1.54392	0.371673	-0.0595239	0.162434	-0.474309	-1.23941	-3.65444	-2.83173	-4.02505	-4.42174	-5.00348	0.169418	0.752296	0.999831	0.999319	0.999822	0.727028	6.34e-06	0.000204232	1.61e-07	2.38e-08	1e-09	0.874987	1.66435	1.82379	0.210516	-0.839978	0.763506	0.266306	0.18636	0.21361	-0.237193	0.289142	0.472318	-0.0978804	0.365807	0.729128	-0.563681
Q815K2		+					+	+	+	+	+	0.442594	-6.07936	-0.0883834	-0.742984	-0.891383	-1.03947	-5.59601	-8.54018	-9.03225	-10.1896	-8.70984	0.958687	3.53e-09	0.999831	0.999319	0.999822	0.999689	1.56e-06	3.85e-10	3.16e-11	1.33e-12	1.59e-11	4.212	5.03291	5.0987	-3.95339	-0.740848	-1.24038	4.54437	4.57903	4.82732	4.61238	4.50358	4.60618	3.37096	4.10506	4.08923	3.40665
Q816H4		+					+	+	+	+	+	1.51078	-2.57457	-0.10088	-0.687953	-0.882472	-0.924477	-4.84681	-7.09074	-6.75892	-7.70482	-5.6281	0.508052	0.00166384	0.999831	0.999319	0.999822	0.999689	0.000193383	2.8e-07	1.22e-07	8.81e-09	9.91e-07	3.57273	3.48084	3.53695	-0.0166054	-0.278531	-2.08275	2.40159	2.72341	1.86808	1.6429	2.8153	2.2688	0.0618753	2.1449	2.56592	0.147055
Q813S4							+	+	+	+	+	0.583078	-0.113351	0.0291443	-0.0458991	-0.226453	-0.871924	-4.46501	-5.10758	-8.51227	-8.46534	-8.82515	0.904244	0.403305	0.999831	0.999319	0.999822	0.999689	5.49e-05	4.92e-06	1.12e-10	6.87e-11	1.59e-11	3.73547	3.92805	4.13959	3.29987	3.18492	2.51667	3.50356	4.03301	3.45218	3.62917	3.88627	3.59732	3.3015	3.61426	3.77878	3.35941
Q81HR7		+					+	+	+	+	+	1.17993	-6.81104	-0.111324	-0.540415	-0.391553	-0.852447	-3.83461	-4.77225	-7.36053	-8.90362	-7.92388	0.514479	3.06e-11	0.999831	0.999319	0.999822	0.999689	5.49e-05	1.23e-06	1.1e-10	1.33e-12	6.37e-12	3.86533	4.00638	4.12864	-5.03331	-4.02064	-3.63096	3.06615	2.90768	3.42163	2.99361	3.20166	2.90277	2.50139	2.67534	2.44095	2.67952
Q81HI2							+	+	+	+	+	1.14605	-0.743734	-0.0221596	-0.202783	-0.471056	-0.789906	-2.39957	-3.52539	-2.92012	-4.96304	-3.57867	0.15131	0.000986333	0.999831	0.999319	0.999822	0.727028	4.79e-06	4.44e-09	3.01e-08	8.14e-13	1.21e-10	1.43089	1.10004	0.897422	-0.369699	-1.36759	-1.21606	0.496916	0.157495	0.270695	0.460225	0.365605	0.0693579	0.258512	0.0105457	-0.108826	0.0711231
Q81BV2							+	+	+	+	+	0.126859	1.02624	0.131849	-0.512503	-0.627107	-0.772982	-4.11123	-4.13116	-4.11094	-5.05746	-4.01249	0.899151	0.358244	0.999831	0.999319	0.999822	0.999689	3.2e-07	1.52e-07	3.2e-08	4.74e-10	1.21e-08	0.707918	0.688791	0.803231	1.32182	1.35687	1.50705	1.04606	0.713696	0.994497	0.723739	1.29843	1.1642	-0.0196352	0.443523	0.636337	0.148888
P0A4F6		+					+	+	+	+	+	1.6995	-2.67431	0.392722	0.181603	-0.0385672	-0.772788	-3.8854	-4.69539	-5.05903	-4.79091	-3.35862	0.267108	0.000119206	0.999831	0.999319	0.999822	0.999689	0.00018108	7.26e-06	3.69e-07	7.39e-07	4.87e-05	0.624489	1.83871	1.89205	-2.28329	-2.93552	-4.25972	-0.101725	-0.259543	0.552925	0.276624	0.572675	0.557086	0.394572	-0.119658	0.305027	0.0128727
Q81EI9		+					+	+	+	+	+	0.560574	-7.86182	-0.118333	-0.278463	-0.459904	-0.715255	-2.81097	-4.35578	-5.89367	-6.54884	-7.54638	0.810298	2.64e-16	0.999831	0.999319	0.999822	0.999689	6.49e-06	2.48e-09	1.72e-12	1.35e-13	2.29e-15	5.61447	6.95194	7.00409	-2.56099	-2.23411	-1.61393	6.16972	6.38338	6.27057	6.10513	6.27167	6.12843	5.27551	6.32154	6.2347	5.35615
Q819S2							+	+	+	+	+	0.593915	-0.384823	0.235626	-0.452538	-0.133665	-0.667457	2.00672	6.15542	5.69308	5.14684	4.40805	0.83495	0.0934144	0.999831	0.999319	0.999822	0.999689	0.0157566	2.6e-10	2e-10	6.74e-10	3.53e-08	-4.08883	-3.38781	-2.4203	-5.04065	-3.21676	-5.28811	-2.25776	-4.63448	-3.85155	-3.14946	-3.93939	-2.9115	-4.08889	-3.69823	-4.47081	-3.84832
Q81BZ2		+					+	+	+	+	+	0.53248	-5.38897	-0.278203	-0.142105	-0.373231	-0.649254	-3.17414	-6.92461	-7.27509	-7.85224	-6.69091	0.873512	2.12e-11	0.999831	0.999319	0.999822	0.999689	2.69e-05	3.95e-11	1.72e-12	2.27e-13	1.68e-12	2.86213	3.49183	3.17542	-3.89617	-2.57492	-2.47622	2.68058	3.04969	3.13656	2.6119	2.71999	2.73689	2.5283	2.96849	2.7872	2.37079
Q813I5		+					+	+	+	+	+	0.437947	-2.47448	-0.220947	-0.280496	-0.510705	-0.479549	-1.27195	-1.67854	-3.37422	-4.40896	-5.40782	0.85363	3.44e-11	0.999831	0.999319	0.999822	0.999689	0.000734314	2.33e-05	2.01e-11	7.24e-14	2.41e-16	3.2694	3.11995	3.07296	0.295053	-0.550056	0.267679	2.90003	2.96901	3.21433	2.76853	2.81566	2.87289	2.6617	2.6643	2.75935	2.49066
Q812K9		+					+		+	+	+	0.803576	-2.8057	-0.289444	0.0617797	0.0250225	-0.404645	-1.80746	-0.393349	1.33359	2.30851	2.77365	0.696416	3.05e-06	0.999831	0.999319	0.999822	0.999689	0.0347738	0.838433	0.0238115	0.000305214	0.000126686	-1.19897	-0.074213	-0.1659	-5.32013	-2.8596	-4.79953	-1.12181	-1.24122	-0.551884	-1.31591	-1.05166	-1.37911	-1.34778	-1.1599	-0.378414	-1.29799
Q815X6		+					+	+	+	+	+	0.233945	-2.53391	-0.138905	-0.74735	-0.478559	-0.28744	-2.90605	-6.83899	-8.23791	-7.54855	-7.91184	0.98658	0.000218521	0.999831	0.999319	0.999822	0.999689	0.00527628	1.15e-08	9.04e-11	2.41e-10	5.26e-11	4.06368	3.33466	3.79844	1.19695	1.62958	-0.645666	3.38935	3.75333	4.28715	3.46926	3.99242	3.588	2.27716	2.99718	3.75693	2.51597
Q81CA4							+					0.490177	0.553714	0.052852	0.00653203	-0.346283	-0.262715	-1.20339	-0.491083	0.39614	0.383502	0.202543	0.834516	0.989681	0.999831	0.999319	0.999822	0.999689	0.0122389	0.463507	0.203091	0.198348	0.95525	-0.333292	-0.946362	-1.09918	-0.760443	-1.14288	-0.99725	-0.919577	-0.807069	-1.18782	-1.14792	-0.759749	-0.811679	-1.02125	-1.09426	-0.935877	-1.16364
Q81AH2		+					+					0.601035	-2.42684	-0.0362644	-0.0386232	0.0036176	-0.250717	-1.00086	-0.367175	0.729375	0.806359	0.596532	0.655001	2.03e-10	0.999831	0.999319	0.999822	0.999689	0.0159897	0.593057	0.0130568	0.00607066	0.184149	0.438465	-0.327814	-0.613282	-3.23499	-4.00175	-3.06189	-0.47716	-0.619311	-0.274372	-0.73899	-0.337295	-0.36679	-0.264102	-0.739059	-0.640076	0.00250435
Q817R9		+					+	+	+	+	+	-0.0116119	-2.02401	-0.224764	-0.338339	-0.416283	-0.228138	-1.12783	-1.21343	-1.06502	-1.60087	-2.90356	0.669414	8.41e-08	0.999831	0.999319	0.999822	0.999689	0.026965	0.0136597	0.00955317	0.000197448	4.51e-09	-0.740778	-1.34313	-1.34374	-3.31987	-3.14059	-3.71672	-0.737614	-1.0674	-0.652893	-1.09997	-0.817899	-1.17777	-1.60616	-0.989454	-1.03383	-1.60038
Q819S7		+					+	+	+	+	+	0.427252	-1.7901	-0.0898774	-0.176501	-0.226982	-0.163582	1.63477	3.32702	3.26866	2.88463	1.85842	0.890368	2.95e-08	0.999831	0.999319	0.999822	0.999689	0.000283437	3.38e-10	1.04e-10	4.8e-10	7.79e-06	-0.393661	-1.11699	-1.30891	-3.95106	-3.41388	-2.81903	-1.07137	-1.29193	-0.803123	-1.0315	-1.15458	-1.21341	-0.993678	-1.5643	-1.29448	-0.923988
Q818E2							+	+	+	+	+	0.328466	-0.542259	-0.18572	-0.114003	0.0757237	-0.0688127	-1.60432	-3.39466	-5.80817	-4.9758	-5.66204	0.996339	0.0130417	0.999831	0.999319	0.999822	0.999689	0.00606038	1.62e-07	1.71e-12	1.52e-11	4.22e-13	1.12132	2.21068	2.25191	1.11839	0.959428	0.181561	1.238	2.06611	2.2293	1.66915	1.68801	1.65565	1.56241	1.69385	1.77862	1.83218
Q81A11							+	+	+	+	+	0.316305	-0.995455	-0.102441	-0.0783507	-0.33212	0.0750376	-2.40227	-3.76386	-4.65656	-5.70256	-6.11321	0.997984	0.00301114	0.999831	0.999319	0.999822	0.999689	0.000386486	3.02e-07	1.43e-09	1.72e-11	1.72e-12	4.75696	6.12625	5.94629	2.78078	5.31214	4.08894	5.53308	6.25928	5.02312	5.08567	5.74674	5.71231	5.46244	5.22696	5.7345	5.14606
Q81G66							+	+	+	+	+	0.0739969	-0.144623	-0.572537	-0.0441596	-0.00332514	0.222747	2.40477	3.0755	3.55841	3.02118	2.74775	0.733803	0.0309377	0.999831	0.999319	0.999822	0.999689	1.11e-06	2.24e-09	3.26e-11	3.14e-10	1.07e-08	-3.46287	-3.25877	-4.22242	-3.88686	-4.10871	-4.3167	-3.13919	-3.97577	-3.1162	-3.48445	-4.37615	-4.0516	-3.18707	-3.52796	-3.80513	-3.63182
Q819L4		+					+	+	+	+	+	0.16064	-1.35375	-0.216665	-0.144049	-0.134398	0.257104	1.28438	1.52655	2.05247	2.15522	1.23107	0.880582	1.84e-05	0.999831	0.999319	0.999822	0.999689	0.0303657	0.00125861	6.35e-06	2.26e-06	0.00918572	-0.458656	-0.992302	-1.50212	-1.57134	-4.00198	-2.6353	-0.854229	-0.973964	-0.671913	-0.822246	-1.29605	-0.995244	-0.768704	-1.28553	-1.03454	-0.692965
Q819Q7		+					+	+	+	+	+	-0.400734	-1.34068	-0.129205	-0.152581	0.0724316	0.257608	1.19598	1.84005	2.85026	3.0476	3.15767	0.0422922	5.9e-09	0.999831	0.999319	0.999822	0.999689	0.000386486	5.23e-08	4.64e-12	6.42e-13	1.18e-12	-0.728874	-0.344824	-0.108953	-2.09499	-1.2992	-1.32066	0.564598	0.0625296	0.327318	0.283584	0.312922	0.00688648	0.475596	-0.028841	-0.106577	0.252871
Q81J01		+					+	+	+	+	+	0.0230522	-2.24176	0.0205192	-0.0518278	0.0788638	0.389877	1.27827	1.30105	2.03296	1.69344	1.48324	0.413876	1.23e-13	0.999831	0.999319	0.999822	0.999689	1.52e-05	1.09e-06	1.1e-10	1.42e-09	3.33e-07	2.18422	2.19326	2.22506	-0.18376	0.132848	-0.85334	2.47265	2.40981	2.58581	2.56423	2.54086	2.4613	2.55061	2.18324	2.42242	2.64019
Q81JA9							+	+	+	+	+	0.0377445	0.949284	-0.94892	-0.900398	0.128301	0.432902	2.02879	2.54897	4.71525	4.50126	4.60857	0.839792	0.474973	0.999831	0.999319	0.999822	0.999689	0.0143548	0.000362021	5.96e-09	7.64e-09	1.51e-08	-2.7267	-0.953129	-0.919328	-1.53203	-0.250852	-0.794014	-1.59961	-0.971547	-1.20634	-2.1749	-1.13064	-3.28215	-1.69457	-3.29028	-1.65036	-1.6289
Q814X9		+					+	+	+	+	+	0.406199	-1.93616	0.0338682	0.0357933	-0.285924	0.472191	1.61193	2.40381	3.39286	2.67583	1.39178	0.846181	1.96e-12	0.999831	0.999319	0.999822	0.92454	5.23e-07	4.25e-11	1.46e-14	5.39e-13	1.45e-06	0.449938	0.346207	0.41274	-1.82981	-2.43746	-2.2633	0.430454	0.304414	0.190315	0.454764	0.324281	0.284305	0.355821	0.186432	0.333786	0.296072
Q81HC6							+	+	+	+		-0.707605	-0.404586	0.082557	-0.789873	-0.146708	0.567867	1.64702	2.32047	2.92233	2.09618	-0.634045	0.23671	0.0713789	0.999831	0.999319	0.999822	0.999689	0.0495763	0.000555105	4.89e-06	0.00024392	0.137578	-4.04567	-4.2247	-4.02577	-3.41869	-4.7505	-3.93025	-3.12417	-3.48028	-2.63398	-3.16466	-2.96747	-2.82207	-3.67585	-4.76763	-3.32109	-3.34094
Q816A0							+	+	+	+	+	0.342661	0.0376294	0.114905	-0.0604865	0.464723	0.568245	2.02178	3.13747	5.09189	4.34495	3.84342	0.996339	0.424014	0.999831	0.999319	0.999822	0.999689	0.0429894	0.000162215	1.8e-08	1.63e-07	3.46e-06	-3.40402	-3.09336	-2.84649	-4.75624	-3.69726	-2.51783	-2.10457	-5.13747	-2.19492	-2.72673	-3.08615	-3.2428	-2.21202	-4.45602	-3.10691	-2.89754
Q81J53		+					+	+	+	+		0.313241	-2.68395	-0.346104	-0.577056	0.381357	0.590224	2.36928	3.55537	3.90459	1.52751	0.347843	0.997984	9.28e-07	0.999831	0.999319	0.999822	0.999689	0.00173011	1.37e-06	5.26e-08	0.00435831	0.770938	-0.229422	0.0902882	-0.419814	-2.51646	-4.50248	-3.24393	-0.367369	-0.236247	0.0398388	-0.36399	-0.618487	-0.583049	-1.9385	-0.369473	-0.143497	-0.1612
Q819S1		+					+	+	+	+	+	0.788005	2.25352	1.14631	1.83082	0.909594	1.1295	3.23622	8.07213	8.64838	7.98471	7.3326	0.759781	0.017612	0.999831	0.999319	0.999822	0.999689	0.00120507	1.29e-10	7.33e-12	1.45e-11	1.47e-10	-4.01662	-4.9438	-6.78318	-3.92319	-3.4655	-4.67073	-5.56544	-6.73878	-4.8685	-4.62993	-5.1256	-3.9417	-5.03261	-3.77214	-3.03203	-5.83301
Q818A1							+	+	+	+	+	0.67156	1.33192	0.241776	-0.106293	0.159445	1.28091	2.38299	4.88662	6.52054	5.98896	6.08205	0.740355	0.108953	0.999831	0.999319	0.999822	0.541316	0.000686481	1.5e-09	1.63e-12	3.12e-12	4.77e-12	-4.23631	-3.80269	-3.82405	-3.46088	-3.36429	-3.76917	-4.37506	-3.9783	-4.58946	-3.18161	-3.93179	-5.06754	-4.46428	-4.34058	-4.61337	-4.14681
Q815D2		+					+	+	+			-0.87752	-1.86717	0.637182	-1.17436	0.0295531	1.33378	2.21083	2.32064	1.48986	0.752385	0.561136	0.239868	0.000372181	0.999831	0.999319	0.999822	0.925361	0.0163501	0.00273854	0.017021	0.190529	0.565115	-3.19936	-0.691422	-3.55541	-3.29161	-3.26181	-4.57407	-2.23759	-0.324101	-1.31705	-0.767989	-0.427699	-0.734937	-2.71367	-3.44043	-1.40425	-2.18947
Q816A7		+					+	+	+	+	+	0.461694	1.83914	0.550641	0.646649	0.714159	1.35883	2.77614	4.80177	5.77192	4.89812	3.05363	0.939319	0.0431822	0.999831	0.999319	0.999822	0.925361	0.0021374	1.97e-07	1.59e-09	1.74e-08	8.37e-05	-4.64994	-5.4296	-5.03113	-3.89272	-4.4106	-3.38737	-4.88333	-4.93621	-5.74133	-4.93147	-3.91489	-5.02602	-5.03312	-4.85918	-3.88514	-5.60209
Q81IQ6		+					+	+	+	+	+	1.60631	2.56488	-0.641473	0.734321	0.940392	2.03575	3.56225	5.97838	8.47626	8.17253	6.65047	0.327139	0.0104728	0.999831	0.999319	0.999822	0.541316	0.00103341	1.33e-07	5.13e-11	4.77e-11	4.88e-09	-6.5022	-4.48057	-3.42066	-4.20066	-4.54972	-3.48967	-6.19553	-6.4262	-5.66572	-6.78102	-6.3198	-7.0745	-5.19194	-6.96598	-4.08309	-6.30423
Q81HN7		+								+		-1.19914	-5.81186	-0.0840575	-0.0058314	-0.158753	-4.86899	-2.11081	-0.346928	-2.66988	-4.54997	-0.68948	0.738566	0.00302019	0.999831	0.999319	0.999822	0.633033	0.645498	0.969871	0.219705	0.0349171	0.698075	-2.91648	2.57974	3.31358	-3.51259	-4.36143	-3.69968	3.07313	3.36498	1.07104	2.92866	2.28136	2.08351	3.33002	1.9075	2.09761	2.36642
Q81DT3		+						+		+	+	1.41042	-5.23818	-0.324279	-0.693378	-1.1919	-2.70351	-1.9378	-4.04521	-2.23341	-4.0492	-4.9904	0.64563	9.68e-06	0.999831	0.999319	0.999822	0.557817	0.341283	0.00494219	0.0583598	0.00103681	5.78e-05	3.57143	2.77802	2.89925	-4.13541	-3.25805	-4.016	2.43185	1.76547	1.75502	2.07568	1.70681	1.23358	1.28792	1.9215	0.50626	1.15303
Q81A77		+										-2.39464	-5.30812	-2.04669	-1.41091	-0.834153	-2.59842	-1.97344	-0.62148	-0.226854	0.029459	-1.01632	0.378108	0.00138883	0.999831	0.999319	0.999822	0.999689	0.600955	0.920088	0.936349	0.955296	0.514032	0.217762	-3.17051	-0.551585	-3.89433	-4.14619	-4.91662	-0.49576	3.02104	2.08919	-4.31299	1.36264	1.4613	0.905896	-3.49039	2.8097	-0.204098
Q81IB3		+						+				-1.58236	-5.01512	-0.221799	-2.52318	-2.38014	-2.34936	-4.78667	-6.49761	-1.97173	-2.19552	-1.36713	0.62492	0.0035243	0.999831	0.999319	0.999822	0.999689	0.0932431	0.0057802	0.315346	0.255967	0.421976	0.973661	4.06287	-4.67492	-4.25407	-3.38718	-3.00779	1.51091	2.62302	1.90964	1.06464	1.86495	2.48516	0.558011	2.06953	-4.31001	-3.40348
Q81A59		+						+				1.21014	-2.93739	-0.174256	-1.31006	-0.511326	-2.31699	-2.80517	-3.05458	0.136488	0.498697	1.0316	0.702639	0.00257816	0.999831	0.999319	0.999822	0.92454	0.10368	0.0360956	0.868114	0.614204	0.46408	0.510983	0.552879	0.487515	-4.20086	-2.24936	-5.15333	0.157732	-0.782184	-0.519682	-0.0851355	-0.178851	-1.36635	-0.216193	-5.26717	0.252518	-0.182505
Q816V9		+										0.402582	-3.02624	0.0936209	0.0486495	-0.145149	-2.03067	-1.87683	-1.306	-0.188749	-1.14678	-1.65412	0.989094	0.000804594	0.999831	0.999319	0.999822	0.925361	0.292029	0.446503	0.912541	0.291393	0.0746805	-0.516554	0.269119	0.00266743	-4.17945	-2.97025	-4.09389	-0.0836468	-0.355159	-0.0788136	0.261693	-0.291299	-0.170588	-0.0701342	-0.320713	-0.137348	-0.386612
Q812I7		+									+	-0.480671	-1.12974	0.182784	0.0369536	0.489161	-1.9841	-0.657364	0.288722	-0.52028	-1.34312	-2.35857	0.645046	0.0367375	0.999831	0.999319	0.999822	0.541316	0.73944	0.873721	0.601728	0.120699	0.00308468	-1.68742	-1.82177	-1.70804	-3.88699	-1.45504	-2.53477	-0.702145	-1.80522	-0.332956	-0.409848	-1.12182	-0.723741	-0.100545	-1.14985	-1.6356	-0.335068
Q81A26												0.514553	-0.158885	-1.66344	-0.985745	-2.20616	-1.84612	-0.847081	0.189555	0.847255	1.36996	1.00827	0.939319	0.397873	0.999831	0.999319	0.999822	0.729934	0.639225	0.931021	0.295403	0.0917861	0.346281	-2.3103	-1.13565	-3.98511	-3.84386	-3.10601	-3.21386	-3.85121	-2.60758	-1.58103	-3.39598	-5.46736	-4.13025	-2.46947	-3.32977	-5.35434	-5.10985
Q81HE6		+						+	+	+	+	0.0369701	-1.65801	-1.44746	-1.15169	-0.785643	-1.74906	-0.328446	2.70468	6.60947	7.92108	7.18295	0.925648	0.0244706	0.999831	0.999319	0.999822	0.999689	0.933145	0.0272549	2.06e-07	6.52e-09	7.69e-08	-0.899223	-3.63687	-4.32278	-3.9225	-4.30961	-6.42407	-2.32416	-3.4413	-2.26944	-4.04014	-3.03154	-5.26904	-3.01648	-5.51035	-3.11967	-2.49894
Q819N3		+								+	+	0.119596	-2.93125	0.327258	0.414604	-1.0361	-1.67323	-2.26554	0.261737	-1.48518	-2.8295	-4.28241	0.965955	0.0061769	0.999831	0.999319	0.999822	0.999689	0.308422	0.942504	0.264416	0.030787	0.000904661	-0.659899	1.04482	0.84994	-1.51786	-3.54487	-3.5673	1.05528	1.18707	-0.431379	0.573924	1.05598	1.1994	0.815448	0.887812	1.19499	0.5131
Q81DJ0		+							+	+	+	0.117045	-3.52133	-0.0618649	0.310629	0.386345	-1.66108	0.398535	0.295848	-2.28193	-3.6579	-5.26818	0.925648	9.52e-07	0.999831	0.999319	0.999822	0.541316	0.915364	0.846329	0.00219646	8.02e-06	8.86e-09	0.681931	0.807592	0.556211	-2.88271	-3.50081	-3.19824	0.9139	0.913058	0.802534	0.860272	0.746039	0.874148	1.50651	1.04954	0.848801	1.21669
Q819Y5		+										-0.387946	-1.81653	-0.360725	-0.167887	-1.34102	-1.54757	-0.409295	-0.615823	1.36091	0.832198	0.416914	0.729736	0.0125955	0.999831	0.999319	0.999822	0.999689	0.915364	0.819626	0.135566	0.335648	0.816706	-1.22688	0.350576	-3.77138	-4.61407	-3.19851	-1.8332	-2.15859	-0.888091	0.497728	-0.439082	-2.4566	-0.698878	-0.16134	-1.68756	-1.36023	-0.888718
Q81E43		+								+	+	-0.210261	-4.83005	0.235769	-0.00163078	-2.17985	-1.53182	-3.05311	-1.46897	-2.16756	-3.89709	-4.73369	0.87305	0.000144593	0.999831	0.999319	0.999822	0.999689	0.137044	0.518669	0.108535	0.0046984	0.00049888	1.43193	0.479036	0.08146	-4.64545	-3.73655	-4.1973	2.10932	1.01379	0.434996	1.45267	1.10018	1.74912	1.70637	0.905067	0.78525	1.50263
Q81EF0										+	+	-0.156094	-1.27358	0.848269	0.255448	-1.6926	-1.53147	-3.68929	-0.448057	-2.33824	-4.35726	-5.61882	0.925648	0.265081	0.999831	0.999319	0.999822	0.999689	0.191283	0.948609	0.182542	0.013106	0.00123666	2.15799	1.105	0.489114	1.15809	-0.210586	-1.26021	2.95879	1.66806	0.528427	2.35806	2.57796	2.80063	2.35165	1.32674	2.08671	2.02762
Q817P5		+										0.107237	-1.17578	-1.17933	-0.285325	-0.31875	-1.46442	-1.23013	-1.16974	-1.27639	-0.980216	-0.340335	0.906199	0.00586624	0.999831	0.999319	0.999822	0.547729	0.244592	0.202157	0.0527194	0.142993	0.415849	-1.8803	-1.67797	-1.59701	-3.08833	-2.95204	-3.67632	-1.74374	-1.43042	-1.36794	-4.1656	-1.72615	-2.15176	-1.82271	-1.89937	-1.83251	-1.95066
Q81C52	+	+							+		+	-1.44266	-1.33435	-0.59659	-0.748287	-1.19004	-1.38647	-0.788673	0.988071	1.22471	0.921712	-1.22252	0.0199752	0.000424084	0.999831	0.999319	0.999822	0.266782	0.365388	0.117679	0.0125711	0.0485655	0.00707996	-3.76561	-3.83691	-4.25017	-4.39902	-3.83254	-4.00856	-2.06096	-1.11218	-3.41668	-2.90853	-2.24823	-3.18627	-2.3695	-3.09139	-3.53032	-2.5552
Q813Q8									+			-0.0631243	-0.605139	0.133249	-0.849195	-0.353119	-1.38139	-1.20794	-1.85693	-1.80927	-0.93964	-0.805155	0.839792	0.129099	0.999831	0.999319	0.999822	0.999689	0.39577	0.0809852	0.0287219	0.268973	0.212841	-4.07829	-1.73558	-3.14379	-4.45656	-4.09859	-2.74092	-3.96256	-1.71095	-2.15989	-3.17619	-2.18038	-2.04051	-4.25447	-4.19683	-2.0862	-2.1837
Q814P4								+	+			0.100322	-0.222945	-0.893285	-1.71602	-1.19795	-1.36494	-1.32491	2.04438	4.13131	1.11398	0.978711	0.923837	0.258352	0.999831	0.999319	0.999822	0.925361	0.266515	0.0169999	1.49e-06	0.0904519	0.263344	-3.59615	-3.133	-3.86251	-3.32566	-4.24486	-4.7033	-4.49141	-2.38966	-3.07666	-3.79714	-4.43904	-4.36484	-5.86311	-4.17815	-5.22105	-5.26284
Q81DD6												0.567014	-0.409621	0.618115	-0.885537	0.683568	-1.30387	0.00443776	0.195562	0.115878	1.39039	0.258069	0.939319	0.342999	0.999831	0.999319	0.999822	0.999689	0.988682	0.94489	0.870488	0.156768	0.946942	-4.01649	-0.674109	-1.85381	-3.28157	-2.96364	-3.94145	-1.65525	-3.61408	-2.04122	-1.59745	-1.89601	-1.92619	-4.08631	-4.79273	-1.24465	-1.53989
Q815W8									+	+	+	-0.00979042	0.0308466	-0.654986	-0.342725	-1.16101	-1.25727	-0.64141	0.513769	3.78121	3.90552	4.35832	0.897008	0.562121	0.999831	0.999319	0.999822	0.999689	0.797469	0.792294	0.000157189	9.17e-05	5.39e-05	-2.19042	-3.66948	-3.9156	-2.60543	-2.9778	-4.78271	-1.97685	-3.47176	-3.36262	-3.0972	-4.60836	-3.03407	-1.83499	-4.74545	-3.4155	-3.38863
Q81H14										+	+	0.0184301	0.0798454	0.248334	-0.322188	-0.111481	-1.24163	-1.36623	-0.210531	1.01782	2.39606	2.78369	0.897753	0.567897	0.999831	0.999319	0.999822	0.999689	0.364604	0.958782	0.202987	0.00464531	0.00319397	-0.912373	-0.610149	-0.837062	-0.878143	-0.540833	-1.46872	-0.325832	-0.0666189	-1.08753	-0.236793	-0.230212	-0.231412	-0.816588	-1.43332	-0.353161	0.0567474
Q81B14		+									+	-0.224024	-1.60538	-0.451653	-0.868067	-0.919289	-1.20531	-1.48826	-1.66414	-0.81021	-1.1041	-2.36744	0.763416	0.0096424	0.999831	0.999319	0.999822	0.999689	0.308422	0.159915	0.381205	0.215069	0.00337952	-0.451855	-0.69276	-4.00465	-2.58205	-3.28886	-4.13478	-0.521643	-2.02861	-0.99205	-0.536826	-1.63465	-2.68922	-1.17718	-2.78833	-2.33752	-1.01525
Q81J75		+								+		-1.41835	-1.2766	-0.691894	-1.26125	-0.933861	-1.16857	-0.505162	-1.02768	1.51608	1.75532	0.78938	0.169418	0.0232235	0.999831	0.999319	0.999822	0.999689	0.824717	0.463507	0.0531968	0.0260849	0.465972	-2.76167	-4.17839	-4.44393	-4.36381	-4.02956	-3.27775	-1.36667	-1.79962	-3.02777	-3.46084	-3.39427	-1.37805	-3.07771	-3.61928	-3.43732	-3.60222
Q813E9									+		+	0.722272	-0.815994	-0.0680402	0.0797342	-0.38231	-1.15987	-1.01792	-1.13091	-1.66379	-0.760424	-1.29038	0.763416	0.0296465	0.999831	0.999319	0.999822	0.999689	0.364604	0.244007	0.0143381	0.281694	0.0235622	-1.22251	-2.12332	-2.03483	-4.26064	-3.86331	-2.58386	-1.71684	-2.34922	-2.54653	-1.87749	-2.50237	-2.40028	-1.93054	-2.62522	-1.97414	-2.59882
Q81G69												-0.37219	0.940115	-0.261872	-0.265561	-1.0755	-1.15121	0.926456	1.48128	1.08176	0.32027	0.114624	0.62541	0.554876	0.999831	0.999319	0.999822	0.999689	0.549906	0.0820944	0.092382	0.561044	0.930562	-2.87376	-4.50091	-4.431	-1.9635	-4.05613	-2.56147	-4.00764	-2.79734	-2.94922	-4.43414	-1.97498	-4.09414	-3.83318	-3.08805	-3.78619	-4.41953
Q816D1		+								+	+	0.865817	-2.12973	0.0953782	-0.22881	0.144007	-1.11248	-0.100368	-0.0559902	0.728872	1.11239	1.65448	0.656478	5.63e-05	0.999831	0.999319	0.999822	0.999689	0.971159	0.998719	0.189689	0.0489347	0.0163979	-0.157907	-0.954552	-1.09637	-3.76906	-4.68572	-3.45305	-0.666065	-1.29062	-1.9147	-0.863786	-1.09313	-1.59177	-1.01767	-2.12762	-1.56904	-0.95809
Q81IB8												0.087986	-1.29967	-0.310324	0.222904	0.832011	-1.09288	0.238932	-1.68846	-0.157852	0.966033	1.01275	0.953356	0.133373	0.999831	0.999319	0.999822	0.999689	0.984135	0.416988	0.949726	0.411114	0.527974	-1.83199	-2.24954	-1.66083	-4.05648	-2.06666	-4.49454	-3.23943	-1.70492	-0.127085	-0.542611	-4.27447	-1.14876	-1.37373	-2.55382	-0.631689	-0.538332
Q81E83		+										0.494361	-1.89405	0.0934455	0.0376314	-0.0153262	-1.07365	-0.311085	-0.0962899	-0.35111	-0.151471	0.7608	0.925648	0.000411172	0.999831	0.999319	0.999822	0.999689	0.883369	0.991318	0.681469	0.915212	0.384909	-0.674889	-0.145231	-0.469295	-2.87728	-2.67227	-3.61745	-0.436005	-0.0537825	-1.34781	-0.773547	-0.478568	-0.268588	-0.80111	-0.883369	-0.196753	-0.355326
Q819L5		+							+	+	+	-0.39845	-2.33348	-0.310144	-0.845334	-1.08708	-1.07307	-0.623228	-1.91276	-1.94107	-2.59812	-2.03261	0.673267	0.000876833	0.999831	0.999319	0.999822	0.999689	0.770431	0.0891922	0.0259368	0.00345672	0.00941702	-0.722395	-2.01888	-3.68641	-4.7792	-3.67357	-4.49235	-0.691397	-1.35495	-2.25108	-1.92707	-1.32467	-1.93957	-1.95607	-3.29172	-1.74217	-2.46125
Q819R0									+	+	+	0.0270227	0.549504	0.182417	-0.322039	0.139956	-1.0694	0.0129216	-1.38181	-2.21995	-2.19049	-2.52399	0.865173	0.999978	0.999831	0.999319	0.999822	0.999689	0.985985	0.164433	0.00294782	0.00327587	0.000326314	-2.12512	-2.67751	-1.64388	-1.87092	-1.99998	-1.72053	-1.94588	-2.07342	-1.57339	-1.12494	-1.8676	-2.01633	-1.9363	-2.76857	-2.01046	-2.10582
Q816J1		+								+		0.522719	-1.48347	-0.334696	-0.562174	-0.504829	-1.05689	-1.40184	-0.928759	-0.00197665	-2.99276	0.340916	0.925472	0.00551169	0.999831	0.999319	0.999822	0.999689	0.259376	0.459679	0.936863	0.000230034	0.836054	-2.19529	-1.83421	-2.20578	-5.15771	-3.84229	-3.96619	-1.97346	-2.86436	-2.03072	-2.69576	-2.32053	-2.81978	-1.92706	-4.62962	-2.15491	-2.01017
Q813F0		+								+	+	-0.341196	-1.06395	-0.537731	-0.0602334	-0.736192	-1.03106	-1.14386	-0.182125	-1.49781	-1.81249	-2.68867	0.660054	0.0248703	0.999831	0.999319	0.999822	0.999689	0.373231	0.958782	0.0511573	0.0190882	0.000311496	-1.48648	-3.14573	-3.91005	-3.19534	-4.05708	-4.17045	-1.08422	-3.18631	-2.31325	-2.79444	-2.44733	-2.91864	-1.77038	-1.68867	-3.46196	-2.12518
Q81H80												-0.638528	-1.16232	0.397071	-0.186035	0.524755	-0.999364	-0.897105	0.108967	1.71766	0.939226	-1.19889	0.620241	0.0583177	0.999831	0.999319	0.999822	0.999689	0.647226	0.958782	0.0555935	0.268973	0.140206	-3.99202	-1.89804	-1.89609	-2.66716	-4.07233	-3.33039	-2.2294	-1.43544	-1.27083	-0.818274	-2.03517	-0.854447	-2.27088	-1.6413	-1.73812	-1.07858
Q81IP1		+							+	+		0.857744	-1.48218	-0.446258	-0.249121	-0.189048	-0.989023	-0.0555223	-0.244127	1.78233	2.13118	0.969624	0.706662	0.00419252	0.999831	0.999319	0.999822	0.999689	0.984135	0.943012	0.0102075	0.00251016	0.263523	-0.387835	-0.773918	-0.637956	-3.19204	-3.46924	-2.87055	-0.959871	-1.63442	-0.843758	-1.39985	-1.66966	-1.67075	-1.2342	-1.54877	-1.55896	-1.80287
Q81C54		+								+	+	0.314991	-1.41686	0.178265	0.0592289	-1.15217	-0.985062	-1.87338	-0.376087	-1.98113	-3.27765	-2.62915	0.997984	0.0416479	0.999831	0.999319	0.999822	0.999689	0.266515	0.920088	0.053521	0.00199027	0.00595345	0.534508	-0.824974	-2.07525	-2.73413	-2.08544	-3.45404	-0.118731	-0.548158	-1.7089	-0.610707	-0.40533	-0.788398	-0.183467	-1.20076	-0.9704	-0.365057
Q813M5		+										0.843736	-2.34933	-0.636133	-0.21835	-0.126443	-0.974609	-0.16001	-0.434433	0.103074	0.746819	0.982021	0.686797	4.19e-05	0.999831	0.999319	0.999822	0.999689	0.941744	0.819387	0.803856	0.191721	0.209847	-0.213394	-0.4207	-0.144738	-3.55833	-4.21108	-3.30096	-0.994062	-0.518544	-0.862539	-2.61121	-0.8259	-0.809875	-1.35028	-0.801527	-1.03491	-0.973612
Q817G9									+	+		-0.596789	-1.07559	-0.317401	-0.20214	-0.306007	-0.949201	1.03713	1.04241	2.54674	2.02615	1.70297	0.620241	0.0601306	0.999831	0.999319	0.999822	0.999689	0.617831	0.430521	0.00465249	0.0194656	0.0887855	-1.48203	-0.736729	-3.49913	-2.86732	-3.0788	-1.92052	-1.47344	-1.2373	-0.281878	-1.79354	-1.29912	-0.815604	-2.04596	-0.938393	-0.771215	-1.78512
Q81A62		+							+	+	+	1.26095	1.72449	-0.097531	-0.226775	-0.294512	-0.948856	-1.22623	-0.647301	1.93533	1.32897	2.03178	0.339083	0.0419042	0.999831	0.999319	0.999822	0.999689	0.207108	0.578799	0.00141957	0.0189656	0.00276575	2.64403	2.04531	1.95062	2.15975	2.91279	2.24568	1.1785	1.00688	1.60662	1.09303	1.01218	1.43075	0.679772	1.06521	1.21016	0.851778
Q81GP4		+										-0.60367	-1.90805	0.142539	0.0723705	-0.5424	-0.93103	-0.380182	-0.601311	-0.077137	-0.0406024	-0.566476	0.501173	0.00111134	0.999831	0.999319	0.999822	0.999689	0.868757	0.729233	0.990198	0.960645	0.311577	-1.59521	-2.51867	-2.86528	-4.5763	-3.73545	-3.29292	-1.29293	-1.08243	-1.85789	-0.988135	-1.51811	-1.26283	-1.02011	-1.68578	-1.46677	-1.20608
Q81FP1		+										-1.02665	-1.37846	-0.304899	0.104165	-0.526967	-0.91733	-0.373397	-0.562003	-0.255154	0.712814	0.173584	0.171939	0.00288723	0.999831	0.999319	0.999822	0.999689	0.829282	0.700923	0.78144	0.209371	0.993842	-2.06558	-3.75204	-4.16845	-4.21181	-3.93399	-3.60808	-1.72404	-1.82723	-2.41997	-1.09577	-3.44649	-2.30712	-1.82986	-2.10516	-1.88026	-2.04243
Q81E87	+							+	+	+	+	-2.54111	0.0662101	-0.593653	-0.922686	-2.01869	-0.903029	-0.75983	3.30076	6.80087	7.75544	8.27199	0.00551879	0.476175	0.999831	0.999319	0.880151	0.999689	0.595122	0.000171936	2.69e-10	1.17e-11	5.43e-12	-8.24602	-7.20908	-5.29155	-4.62532	-6.0156	-2.99612	-4.60645	-4.70642	-2.87555	-4.70479	-4.89356	-4.33446	-4.5589	-5.8883	-4.66579	-5.98198
Q819Y9									+	+	+	0.264211	-0.0588703	-0.371822	-0.177811	-0.856161	-0.896026	0.182657	1.12847	3.66159	3.61959	3.08917	0.992932	0.360641	0.999831	0.999319	0.999822	0.999689	0.981289	0.218719	5.94e-06	5.16e-06	0.000135224	-2.5297	-3.12979	-3.7359	-3.5621	-4.68932	-2.82556	-3.08003	-2.87856	-3.29452	-3.75769	-3.24072	-3.33361	-2.13292	-3.184	-4.62616	-4.30017
Q81HK3												0.276297	-0.0552273	-1.00508	0.357267	0.218237	-0.89386	-2.56199	0.322271	0.924439	-1.49284	-0.512612	0.997984	0.655971	0.999831	0.999319	0.999822	0.999689	0.296756	0.941172	0.49194	0.30503	0.63542	0.0605259	-0.964935	-1.37513	-1.08234	0.341035	-3.24516	-0.560991	-1.14886	-0.46368	-0.888934	-0.482579	-3.7807	-1.46781	-0.434549	0.644102	-0.08885
Q817P7												-1.444	-1.05679	-0.641333	-0.895519	0.453893	-0.883385	0.0794462	0.511427	1.39168	1.10864	0.860407	0.180775	0.0524822	0.999831	0.999319	0.999822	0.999689	0.992766	0.772144	0.0871138	0.159245	0.436285	-3.85767	-4.0761	-3.95916	-3.35702	-4.10958	-3.97707	-2.26183	-3.14797	-1.21624	-2.265	-4.67059	-1.57789	-2.35068	-3.83665	-3.2818	-2.50201
Q819D4		+									+	-0.666915	-1.03392	0.172557	0.433771	0.125455	-0.882124	-0.790034	0.200963	0.210695	0.473549	-1.29947	0.326306	0.00785492	0.999831	0.999319	0.999822	0.999689	0.477423	0.872423	0.65973	0.349429	0.0148738	-2.84649	-3.9168	-3.53841	-4.2802	-4.67101	-3.16386	-2.47367	-2.77839	-2.11399	-2.9601	-1.9909	-1.86082	-2.43998	-1.76715	-2.01414	-2.61035
Q81F30									+	+	+	0.407437	0.221535	-0.43312	-0.164958	-0.0685399	-0.879522	-0.452836	0.799185	3.04091	2.78209	2.48581	0.979294	0.682201	0.999831	0.999319	0.999822	0.999689	0.859839	0.537209	0.00049626	0.00106148	0.00673642	-3.09151	-3.82326	-2.09509	-3.10715	-3.50989	-3.66288	-2.35661	-1.86539	-5.07528	-3.07567	-4.80545	-2.67896	-2.69305	-3.9566	-3.29902	-3.26935
Q817H2												-0.121764	-0.271024	-0.361802	-0.687841	-0.240503	-0.84952	-0.956578	-0.437063	0.472225	0.555336	0.0456734	0.681362	0.0986682	0.999831	0.999319	0.999822	0.999689	0.262473	0.737023	0.29914	0.213815	0.808536	-2.21062	-3.98446	-2.82803	-3.61265	-3.5804	-2.99019	-2.51831	-2.9322	-2.27241	-3.16576	-2.98264	-2.62336	-2.72714	-4.04434	-3.17148	-2.91684
Q81J81		+							+	+		-0.810897	-2.52699	0.00671323	-0.0526295	-0.169423	-0.849199	-0.910235	-0.129089	1.21602	1.31031	1.02359	0.220102	5.43e-06	0.999831	0.999319	0.999822	0.999689	0.370766	0.979638	0.0296773	0.0187881	0.149777	-1.49313	-3.32276	-3.46031	-4.74595	-5.56914	-3.82174	-1.89323	-1.97449	-1.04089	-1.8227	-1.51366	-1.51554	-1.74853	-1.87854	-1.59595	-2.19779
Q815Y3		+										0.0159442	-4.89649	0.246263	-0.285536	-0.766865	-0.836661	-2.40168	-0.447115	0.786193	0.646971	0.77857	0.917598	1.73e-06	0.999831	0.999319	0.999822	0.999689	0.0932431	0.890273	0.380578	0.446845	0.544587	0.235519	1.57208	0.573817	-3.96245	-5.35622	-3.74958	1.39794	1.54675	0.32379	0.933684	1.86498	1.24516	0.39507	0.450655	1.40962	0.709759
Q81D41		+							+		+	0.21869	-1.56071	-0.262484	-0.691408	-0.743146	-0.836161	-0.433283	-0.975611	-1.04011	-0.988722	-1.14911	0.94014	1.96e-05	0.999831	0.999319	0.999822	0.925361	0.616941	0.118151	0.0282774	0.0388856	0.00357691	-1.34548	-1.76518	-1.71185	-4.02129	-2.72791	-4.12388	-1.26893	-1.76042	-1.51433	-1.63413	-1.78465	-1.8758	-1.82851	-2.52513	-2.4208	-1.92258
Q818B2											+	0.362101	-0.3566	-0.289026	0.138497	-0.230865	-0.82418	-0.274386	0.347041	-0.594394	0.128295	-1.79253	0.990316	0.108953	0.999831	0.999319	0.999822	0.999689	0.882735	0.751299	0.375406	0.732294	0.00141366	-2.44435	-2.67388	-3.41014	-3.79186	-4.85425	-2.75072	-1.96413	-3.06589	-3.64976	-3.29145	-3.19868	-3.02017	-2.85644	-2.85151	-2.71287	-2.22684
Q81GG2		+						+	+		+	-1.76688	-2.85289	-0.470133	-1.18438	-0.354929	-0.8193	-0.272167	-2.22791	-2.28827	-0.214155	-1.91315	0.11145	0.00023082	0.999831	0.999319	0.999822	0.999689	0.933145	0.0484992	0.0120233	0.88399	0.0173809	-3.2862	-4.67647	-1.66407	-4.82459	-3.88956	-4.88301	-1.17453	-1.50484	-0.711842	-1.11068	-1.60554	-2.04883	-1.04356	-3.73018	-2.32715	-1.12356
Q81DJ5								+	+	+	+	0.0968081	0.856143	-0.850226	-0.818653	-0.996885	-0.811572	-0.873332	4.07342	6.0309	5.12497	4.35651	0.839792	0.489641	0.999831	0.999319	0.999822	0.999689	0.25465	5.62e-09	1.06e-12	9.19e-12	6.21e-10	-3.90065	-3.24335	-4.15977	-2.28526	-3.22226	-4.23061	-2.92503	-3.74247	-3.99181	-4.99261	-3.71641	-4.4644	-4.15297	-4.52321	-4.59561	-4.75027
Q812J4												-0.0963958	0.326749	0.222636	-0.472141	-0.372436	-0.806267	-1.43846	-0.258625	-0.495092	-0.354537	0.193354	0.785018	0.734639	0.999831	0.999319	0.999822	0.999689	0.187289	0.933704	0.541918	0.686991	0.986422	-2.51639	-4.72994	-3.95187	-2.69368	-4.1554	-3.79204	-3.66462	-2.35996	-3.94954	-2.29329	-3.81518	-3.16118	-3.9347	-3.85323	-3.75913	-2.34135
Q817M7		+							+			-0.569983	-1.94192	1.18054	0.0659911	0.182133	-0.800086	0.271878	-1.21556	1.67945	1.13436	-0.376642	0.532878	0.000992516	0.999831	0.999319	0.999822	0.999689	0.957982	0.282195	0.0184434	0.0936098	0.457793	-2.71994	-1.93007	-1.77205	-4.04356	-3.59408	-3.61261	-1.76389	-1.52909	-0.484243	0.625287	-0.640204	-0.184117	-1.80847	-1.74388	-0.183422	-1.12374
Q814P5		+							+	+	+	1.73332	-1.21032	0.186484	-0.424543	-0.592887	-0.796091	-0.910754	-0.920672	1.58063	2.19953	2.48295	0.187081	0.0113412	0.999831	0.999319	0.999822	0.999689	0.498931	0.441628	0.0201359	0.00183775	0.00172023	-0.638437	-0.618286	-0.686475	-4.14167	-4.50174	-2.84304	-1.2487	-3.54584	-1.41371	-1.87075	-1.61512	-2.12637	-1.64604	-3.89668	-2.09569	-2.39254
Q81FP3		+										-0.208157	-2.27924	-0.159654	-0.866357	-1.0665	-0.784941	-1.08661	-1.15398	0.125912	0.804096	0.0900428	0.666676	2.45e-05	0.999831	0.999319	0.999822	0.999689	0.28507	0.188503	0.763787	0.135993	0.892196	-0.937672	-2.12188	-2.04864	-5.20589	-3.97748	-2.85042	-0.734575	-0.776006	-2.03824	-0.978381	-1.33241	-1.68043	-1.55665	-2.74124	-2.00653	-1.73726
Q81AK6		+							+	+	+	-0.19084	-1.94389	-0.090915	-0.165255	-0.567209	-0.774128	-0.677888	-1.06686	-2.66829	-3.37843	-4.31892	0.727793	0.000483857	0.999831	0.999319	0.999822	0.999689	0.624643	0.321646	0.000404094	2.04e-05	2e-07	-0.0590782	0.419559	-0.708302	-0.569918	-4.49627	-1.25314	0.496521	0.450042	0.213032	0.299287	0.454019	0.170106	0.184886	0.212902	0.109516	0.0940075
Q81D90									+	+	+	0.241926	-0.647431	-0.138224	-0.0557753	-0.0530097	-0.769608	0.322339	0.0643813	-2.25727	-1.92078	1.74909	0.979294	0.0447304	0.999831	0.999319	0.999822	0.999689	0.924184	0.951922	0.000817981	0.00365153	0.0121166	-1.5277	-2.6024	-2.12514	-3.62105	-1.15288	-4.86174	-1.45924	-2.31738	-2.2695	-2.07354	-2.38609	-1.9646	-1.67559	-2.52903	-2.16536	-1.77772
Q819V3												0.423575	-0.944422	0.0355536	0.220076	-0.105052	-0.767986	0.622955	-0.346862	-0.381957	-0.114362	0.316257	0.949696	0.00996783	0.999831	0.999319	0.999822	0.999689	0.681542	0.858932	0.607864	0.954624	0.826722	-2.12769	-1.34803	-2.24118	-3.6642	-3.89046	-2.97858	-2.14306	-1.92532	-1.98434	-2.11977	-2.00912	-1.78061	-2.06846	-1.71466	-1.76591	-1.83038
Q814F4												-0.313263	-0.938512	0.557919	0.4356	-0.621922	-0.767206	-1.57662	0.397688	0.104851	-0.50218	-0.324096	0.751293	0.0986682	0.999831	0.999319	0.999822	0.999689	0.335657	0.855621	0.864554	0.652135	0.605835	-1.47693	-1.29222	-0.614362	-3.40765	-1.26239	-1.30157	0.01614	-0.739619	-0.785351	0.00367641	0.240251	-0.0424376	0.10365	-0.501987	0.0397835	-0.664919
Q81J10									+	+	+	0.992175	-0.920808	0.119951	-0.22509	-0.687087	-0.76371	-0.434031	-0.0917937	3.10828	3.71036	4.48229	0.620241	0.024178	0.999831	0.999319	0.999822	0.999689	0.810331	0.991318	3.03e-05	2e-06	2.85e-07	-0.940069	-3.50927	-2.40838	-4.32024	-4.58276	-4.40602	-2.00761	-4.40102	-2.49072	-2.50843	-2.99233	-3.00217	-1.82429	-4.26065	-3.64621	-2.95959
Q81HH0									+	+	+	-0.650796	-0.35291	0.227752	0.505042	0.0618852	-0.76328	-0.425841	0.276547	-2.63134	-3.85465	-2.72007	0.577715	0.273523	0.999831	0.999319	0.999822	0.999689	0.883369	0.890273	0.00396657	7.3e-05	0.00133505	-1.54127	-1.48826	-0.533315	0.139828	-1.60376	-1.91761	-0.27887	-0.189776	-0.206915	-0.03337	-0.19126	0.268888	0.498384	0.0498371	0.134821	0.353889
Q81AM7									+			0.716655	-0.137191	-0.704179	-0.487891	-0.645139	-0.753768	-1.01521	-1.09942	1.09359	0.780216	0.367729	0.733803	0.202848	0.999831	0.999319	0.999822	0.999689	0.281652	0.180515	0.0388129	0.120839	0.751651	-2.16535	-2.51549	-2.43844	-3.25969	-4.21297	-2.92052	-2.84089	-3.24855	-2.24491	-3.07314	-3.04637	-4.29081	-3.29187	-2.63927	-4.0234	-3.01575
Q816F1		+										-0.318988	-1.31789	-0.408917	-0.426861	-0.882212	-0.72784	-1.30718	-0.889718	0.259099	0.832089	-0.0433458	0.56746	0.00101127	0.999831	0.999319	0.999822	0.999689	0.110768	0.312398	0.570371	0.093823	0.700661	-1.96821	-2.09321	-3.09435	-4.58551	-2.45256	-3.82675	-1.94245	-1.64079	-1.68067	-2.28592	-1.90414	-2.26403	-1.83377	-2.33007	-2.53716	-2.664
Q81DT4		+							+	+	+	0.807315	-2.28632	-0.140547	-0.852053	-0.377567	-0.69574	-0.926374	-1.34708	-1.63698	-3.12317	-1.98388	0.673267	1.57e-05	0.999831	0.999319	0.999822	0.999689	0.362611	0.090462	0.00853865	7.04e-06	0.000525585	0.297724	-1.0702	-1.41099	-4.25335	-4.0823	-3.84108	-0.96036	-1.54544	-1.16472	-1.08295	-1.36116	-1.61149	-1.51158	-2.75756	-2.11405	-1.57245
Q81GP7									+	+	+	0.40763	0.518317	-0.259949	0.049434	-0.80079	-0.689707	-1.07749	-1.17286	-2.83992	-1.85733	-1.7769	0.979294	0.971909	0.999831	0.999319	0.999822	0.999689	0.476086	0.356589	0.00102459	0.0262294	0.0156496	-0.850136	-1.29734	-3.3166	-0.839006	-2.6167	-2.38866	-1.79754	-1.63247	-2.32206	-3.23916	-1.56628	-1.68992	-2.27791	-1.88639	-1.59599	-2.61234
Q81A20									+	+	+	1.07855	0.133998	0.171982	-0.193796	-0.765314	-0.689339	-0.232843	-0.234503	-3.54856	-3.32783	-2.38046	0.604778	0.555108	0.999831	0.999319	0.999822	0.999689	0.931412	0.947495	2.91e-05	5.96e-05	0.00089344	-1.43904	-2.53903	-2.51393	-2.88823	-3.16563	-3.98418	-1.96691	-4.04191	-2.78397	-2.44041	-2.87156	-2.9283	-2.41296	-3.99492	-3.12281	-2.91092
Q815J7	+							+	+	+	+	1.88016	-0.802694	-0.2569	-0.701747	-0.614983	-0.686382	-1.01145	-1.95179	-1.0063	-1.26074	-1.27258	0.0187235	0.00295255	0.999831	0.999319	0.999822	0.999689	0.13273	0.000797883	0.0367144	0.00956503	0.0019762	0.663774	-1.74536	-1.54574	-4.18388	-3.17582	-4.02854	-2.68531	-2.36361	-2.28398	-3.02508	-2.5485	-2.49346	-3.0807	-3.4947	-3.01927	-3.04216
Q81FI2									+	+	+	0.272651	0.396961	-0.241852	-0.308716	-0.0629234	-0.680718	-0.68192	-0.88203	1.89294	2.439	1.95507	0.987413	0.704168	0.999831	0.999319	0.999822	0.999689	0.319581	0.143081	3.49e-05	7.81e-07	0.000110534	0	0.472397	0.178889	-1.31956	0.839494	0.79192	0.158855	0.219266	0.390106	-0.00916195	0.29922	-0.210824	-0.313704	0.11595	-0.116692	-0.0718155
Q81FL0									+	+	+	-0.297265	0.179973	-0.564542	-0.113018	-0.389287	-0.679085	-0.407102	0.374128	3.60134	3.59008	2.79799	0.759781	0.682425	0.999831	0.999319	0.999822	0.999689	0.915364	0.864665	0.00031219	0.000280749	0.00646734	-4.36433	-4.29519	-3.13439	-3.8526	-4.17482	-3.04713	-3.79083	-3.33922	-2.83716	-3.04542	-5.0104	-3.56847	-3.11874	-3.24629	-4.09777	-3.64846
Q81AM3												0.0110868	0.282925	-0.328231	-0.40237	-0.416189	-0.668207	-0.706017	-0.623765	0.481899	0.266603	0.460684	0.738566	0.514128	0.999831	0.999319	0.999822	0.999689	0.312249	0.389226	0.1945	0.410303	0.516536	4.2837	4.81268	4.87665	3.30269	5.17405	5.59945	5.14874	4.92527	4.80065	4.37367	4.76071	4.79215	4.07599	4.40503	5.03001	4.35737
Q819A5									+	+	+	-0.422375	-0.602537	0.25522	-0.276305	0.295636	-0.664882	0.234048	0.352307	1.89047	1.48405	-1.39054	0.60559	0.0867679	0.999831	0.999319	0.999822	0.999689	0.971684	0.806798	0.00642862	0.0259884	0.0258906	-2.17942	-3.87807	-4.07301	-3.8305	-3.28389	-4.26895	-1.72322	-2.87453	-3.33073	-2.07906	-2.82241	-2.22479	-1.89779	-3.89739	-3.11874	-1.95528
Q81GJ4		+							+	+	+	-0.331319	-1.64628	-0.00191434	-0.316584	-0.798654	-0.639811	-0.780849	-0.326383	-3.60761	-2.99864	-3.06191	0.58726	0.000393054	0.999831	0.999319	0.999822	0.999689	0.476086	0.872423	1.05e-06	1.47e-05	3.5e-06	-0.613615	-0.950794	-3.50279	-3.38323	-2.76016	-3.58107	-0.785578	-0.94181	-1.41096	-0.923703	-1.13186	-1.05197	-0.787965	-1.7473	-1.70937	-2.35812
Q81BT4												-0.245893	-0.904732	0.13991	0.0134678	-0.258611	-0.623613	-0.556558	-1.27573	0.415606	0.796126	0.0502726	0.763472	0.086097	0.999831	0.999319	0.999822	0.999689	0.821814	0.362502	0.602147	0.31336	0.893487	-2.82392	-2.4113	-3.60063	-3.9814	-4.2054	-3.33792	-2.60108	-2.55347	-2.00872	-2.85745	-2.36041	-1.48912	-2.29412	-2.02598	-2.9593	-0.997604
Q81FL6		+										0.611635	-1.7973	-0.0473111	-0.347703	-0.486121	-0.618722	-0.44889	-0.685856	0.150839	-0.528064	-0.5315	0.750115	4.37e-06	0.999831	0.999319	0.999822	0.999689	0.595738	0.345338	0.638052	0.299692	0.106427	-0.420387	-0.487415	-0.7335	-2.61473	-4.60534	-2.36041	-0.723652	-1.06329	-0.754375	-0.732747	-0.801274	-1.11266	-0.997462	-1.1996	-1.54388	-1.36934
Q81IC8	+	+							+	+	+	-2.09351	-1.22658	-0.507097	-0.492254	-0.589881	-0.618519	-2.02559	-1.3353	-3.0722	-2.21014	-2.55704	0.0417243	0.0235846	0.999831	0.999319	0.999822	0.999689	0.0922441	0.277047	0.000484829	0.00889721	0.00117849	-5.89077	-4.55137	-1.55826	-3.30801	-3.80913	-2.99484	-1.37214	-1.85731	-1.55552	-1.62409	-2.27944	-2.36618	-1.44478	-3.00005	-1.97343	-1.88099
Q814T1												1.0466	0.508204	0.0261885	0.163659	-0.498903	-0.617545	-1.03441	-0.395971	-0.0792427	-0.585298	0.379116	0.345959	0.931377	0.999831	0.999319	0.999822	0.999689	0.142615	0.742421	0.981935	0.269946	0.685716	2.18388	2.25768	1.65338	1.293	1.23248	1.24191	1.60179	1.43136	0.85688	1.14949	1.31315	1.54253	1.08193	1.66029	1.48226	0.712652
Q814K4									+	+		1.59678	0.0539277	0.450926	0.411626	0.290602	-0.613298	0.365135	1.12808	1.71576	1.90112	1.24121	0.342376	0.527969	0.999831	0.999319	0.999822	0.999689	0.933145	0.322329	0.0290026	0.0156828	0.189308	-1.98591	-1.19928	-2.04824	-3.83353	-3.37935	-3.36145	-4.20624	-2.07934	-2.80329	-4.32757	-1.2399	-2.13205	-3.62752	-2.19061	-2.19238	-3.52546
Q81HE0		+							+	+	+	1.01625	-1.2517	-0.108684	-0.609016	-0.424334	-0.611027	-0.0584284	0.582049	1.65229	1.48494	1.38513	0.453818	0.000957718	0.999831	0.999319	0.999822	0.999689	0.974709	0.437222	0.00187722	0.0039843	0.0235923	-0.25411	-1.10559	-1.05257	-3.67298	-3.57952	-2.67596	-0.949369	-1.74746	-1.82928	-1.73529	-1.31506	-1.76526	-1.76908	-2.88094	-1.85967	-1.5527
Q81DV2		+								+		-0.54316	-1.25024	-0.0790215	-0.136051	-0.540929	-0.6108	-0.571852	0.467614	-0.896163	-1.99267	0.342324	0.505373	0.00871496	0.999831	0.999319	0.999822	0.999689	0.71049	0.704964	0.229411	0.00662274	0.826103	-3.23557	-2.50981	-3.05284	-4.77676	-3.69599	-3.15908	-2.01683	-1.34065	-2.87637	-2.15231	-2.51605	-1.76599	-1.65335	-2.67482	-2.47035	-2.36633
Q814B9		+										-0.157518	-2.50003	-0.450564	-0.872676	-1.28122	-0.608816	-0.650724	-0.48322	-0.169781	0.188361	0.214289	0.660054	1.39e-06	0.999831	0.999319	0.999822	0.999689	0.511199	0.694411	0.856605	0.616904	0.95393	-2.40079	-1.58244	-0.935346	-3.99696	-4.10013	-4.56139	-1.42073	-1.34007	-0.750336	-1.59633	-1.95837	-1.27156	-1.84873	-2.453	-1.98395	-3.48443
Q816J7									+	+	+	1.11992	-0.661041	-0.0978317	-0.35981	-0.391712	-0.606243	-0.43511	-0.49689	-1.68113	-1.25652	-1.01943	0.312333	0.0111344	0.999831	0.999319	0.999822	0.999689	0.645498	0.628596	0.00144749	0.0152984	0.0142407	-1.32519	-2.18734	-1.47039	-2.91053	-3.31468	-4.81295	-2.8262	-1.7352	-2.84638	-2.81924	-1.98067	-2.86481	-3.20736	-2.78002	-2.65636	-3.07418
Q819K1		+										-0.380116	-1.25142	-0.212979	-0.325928	-0.816226	-0.595539	-1.10857	-1.26975	-0.478809	-0.167286	-0.47086	0.58726	0.00479764	0.999831	0.999319	0.999822	0.999689	0.308422	0.164387	0.532814	0.896211	0.31042	-0.305178	-1.15844	-1.66855	-4.46609	-0.932406	-1.05992	-0.429817	-0.314019	-0.31308	-0.736739	-0.43959	-0.482963	-0.754966	-0.8629	-0.57336	-0.885563
Q81AX2		+							+	+	+	-1.39984	-2.21996	-0.231539	-0.197811	-0.405314	-0.593429	0.113879	-0.353384	-2.84201	-3.71762	-3.17132	0.0847414	0.000133465	0.999831	0.999319	0.999822	0.999689	0.985985	0.873721	0.000176433	4.26e-06	1.5e-05	-1.64603	-1.07454	-4.48074	-3.65169	-2.8196	-3.90273	-0.471643	-0.459607	-1.13564	-1.00085	-0.54523	-1.17887	-0.568543	-1.60719	-0.641115	-1.30196
Q819D3		+								+		1.03289	-1.43198	-0.299198	-0.788561	-1.21058	-0.586717	-0.686889	-0.304326	1.10532	1.50532	1.34708	0.623688	0.00563127	0.999831	0.999319	0.999822	0.999689	0.639147	0.913658	0.0993	0.0272831	0.102167	-0.610075	-0.743334	-0.45231	-4.49074	-1.3335	-4.08843	-0.866571	-1.12993	-1.97299	-1.58607	-1.06936	-2.17511	-2.36592	-1.48547	-2.64031	-0.887316
Q81IN4		+										0.0753085	-2.10511	-0.155074	-0.987154	0.157216	-0.582189	-1.10953	-0.547439	0.317566	0.170631	0.191202	0.829888	1.89e-06	0.999831	0.999319	0.999822	0.999689	0.110768	0.546696	0.423658	0.599357	0.982954	-1.14974	-1.65452	-1.69789	-4.3765	-3.93212	-3.44715	-1.71638	-0.938958	-1.13785	-1.71273	-1.26481	-1.24431	-2.31292	-2.93124	-1.66701	-0.912119
Q81H38		+							+	+	+	0.183107	-3.45778	-0.516254	-0.229409	-0.24361	-0.580548	-0.723242	-1.03963	-2.614	-3.54856	-4.6795	0.906199	4.82e-11	0.999831	0.999319	0.999822	0.999689	0.261317	0.050819	3.54e-07	1.12e-09	1.55e-12	6.28335	6.19278	6.03199	1.8505	1.31989	3.70271	6.34549	6.33371	6.2145	5.82332	5.78957	5.76861	5.99861	5.81021	6.24012	6.16901
Q816S7		+									+	0.961524	-1.92598	0.276763	-0.0357679	-0.762069	-0.579331	-0.262849	-0.128297	-1.10327	-1.10321	-2.73412	0.703702	0.0031616	0.999831	0.999319	0.999822	0.999689	0.933145	0.988924	0.211168	0.210048	0.000898575	-0.0800133	-0.944332	-1.43492	-3.34703	-5.10539	-3.38172	-0.646395	-1.63779	-2.12476	-0.719937	-1.35408	-1.46808	-0.697564	-1.91307	-2.06213	-0.823298
Q81B66								+	+	+	+	-0.135978	0.364272	-0.0806471	-0.132242	-0.372476	-0.578962	-0.434331	-1.00688	-1.8588	-2.03301	-2.25994	0.532093	0.605955	0.999831	0.999319	0.999822	0.999689	0.516186	0.0432374	2.57e-05	6.23e-06	2.12e-07	-0.679731	-0.42909	-0.00481129	0.0841656	-0.438876	0.0294704	-0.122593	0.200871	0.150917	-0.235539	0.311021	-0.0516653	-0.251676	-0.202631	0.130253	-0.205095
Q818G7		+										-0.517966	-2.01581	-0.226783	-0.769742	0.308233	-0.578609	-1.23026	-1.07842	0.273021	0.202866	0.947821	0.59057	0.0011476	0.999831	0.999319	0.999822	0.999689	0.364115	0.389226	0.674174	0.719234	0.319308	-2.03484	-3.81745	-2.78391	-4.09413	-4.11888	-5.62909	-1.66618	-2.67162	-1.80961	-2.62535	-1.79463	-2.37121	-1.81892	-4.14828	-2.64596	-2.04294
Q812X5												0.356112	-0.43079	0.191966	-1.52341	-0.844287	-0.577479	-1.56945	-0.37557	-1.11607	-1.65074	-1.49829	0.996339	0.370979	0.999831	0.999319	0.999822	0.999689	0.476086	0.941172	0.36178	0.161169	0.140584	-0.865271	-1.75164	-1.91791	-1.11647	-4.94722	-1.5442	-1.53218	-1.33078	-1.8053	-1.72421	-0.931956	-1.39964	-2.93644	-4.98962	-1.46896	-3.59383
Q812T8												0.462728	-0.804975	0.194597	0.353959	-0.266877	-0.576879	-0.403845	-0.229531	0.218636	-0.786531	-0.0269699	0.939319	0.046671	0.999831	0.999319	0.999822	0.999689	0.838938	0.947495	0.700457	0.305878	0.781663	-1.2263	-3.76201	-3.95118	-4.27479	-3.86863	-5.31153	-2.3398	-3.43931	-3.61368	-3.04092	-2.39775	-3.33375	-2.20138	-3.47829	-2.80776	-3.27262
Q816H7									+	+		-0.106208	0.275761	-0.240669	-1.13883	-0.50898	-0.574577	-0.411246	-1.12684	1.63487	1.82078	-0.0581474	0.759781	0.662897	0.999831	0.999319	0.999822	0.999689	0.810331	0.251444	0.00991535	0.00423224	0.728042	-2.50637	-4.16811	-3.30611	-4.54982	-2.18741	-2.80982	-2.19212	-3.57599	-2.95896	-2.60713	-3.14734	-3.65805	-4.02639	-4.50673	-3.76697	-2.82428
Q81IP4												0.148876	-0.523345	-0.15225	-0.702032	-1.14458	-0.573682	-0.707354	-1.05013	0.572562	0.511357	0.847294	0.939319	0.115604	0.999831	0.999319	0.999822	0.999689	0.624643	0.356589	0.373922	0.401939	0.351736	-2.1505	-2.91794	-3.66883	-3.08865	-4.61029	-3.76735	-2.43256	-2.59321	-3.22323	-2.67838	-2.8568	-3.13401	-2.30521	-3.20893	-4.99748	-2.85912
Q81GQ6									+	+		-0.429684	0.165475	-0.163509	-1.03298	-0.297902	-0.567787	-0.411753	0.347205	1.57921	1.63353	1.52009	0.62492	0.59054	0.999831	0.999319	0.999822	0.999689	0.848622	0.832136	0.0269884	0.0212376	0.0703842	2.4811	-1.19706	2.41436	2.2415	1.1386	1.39143	1.81705	2.07935	2.02596	1.59709	1.84189	2.0294	0.25895	0.5152	1.89273	1.69466
Q812J9		+										0.0631971	-2.33422	0.0533371	-0.749142	-0.53519	-0.564073	-1.69718	-1.94235	-0.0211601	0.165519	1.3469	0.939319	0.00533555	0.999831	0.999319	0.999822	0.999689	0.357521	0.187602	0.968186	0.825285	0.259593	0.322899	-4.95762	0.236838	-3.78691	-5.42575	-3.08981	-1.17099	-0.9689	-1.51269	-1.69704	-0.763043	-0.995919	-1.23756	-3.27561	-1.54335	-1.61769
Q817N4									+	+	+	-0.191387	0.913301	-0.00887807	0.508659	0.203604	-0.562625	0.500159	-0.112342	3.50687	5.63683	4.73601	0.658794	0.497019	0.999831	0.999319	0.999822	0.999689	0.776876	0.986504	3.81e-07	6.02e-11	4.48e-09	-4.60704	-4.59416	-4.27146	-3.6117	-4.48426	-2.77498	-3.50397	-3.83992	-4.61971	-4.3362	-3.58	-4.03747	-3.39096	-3.25088	-3.9523	-4.30653
Q81EA5		+										-0.0758947	-1.37777	-0.654766	-0.366229	-0.703224	-0.561277	-0.451111	-0.912329	-0.542708	-0.354106	-0.0357221	0.660873	6.64e-05	0.999831	0.999319	0.999822	0.999689	0.595738	0.156366	0.282545	0.532331	0.640288	-2.3518	-2.65952	-2.26545	-3.81602	-4.07065	-4.0081	-2.0573	-2.18072	-1.87617	-1.80626	-4.02418	-2.2115	-2.26501	-2.34801	-2.75638	-3.70286
Q81A25									+			-0.627149	-0.977638	-0.694255	-0.491587	-0.549284	-0.55726	0.120973	0.462628	1.1487	0.910259	0.979939	0.222034	0.00230252	0.999831	0.999319	0.999822	0.999689	0.985985	0.516331	0.0150191	0.044318	0.104049	-2.08356	-2.01323	-3.61312	-2.93656	-3.76753	-2.76964	-1.92309	-1.34045	-1.63003	-1.72191	-2.565	-2.65285	-2.15133	-1.88071	-2.4928	-2.66083
Q81IR8		+								+	+	0.360267	-2.60869	-0.389345	-0.455225	-0.47981	-0.54557	-0.669224	-0.886375	0.714817	1.66275	1.13326	0.974811	1.64e-09	0.999831	0.999319	0.999822	0.999689	0.264782	0.089235	0.0362491	3.28e-05	0.0118093	-0.0405674	-0.711037	-0.558972	-2.94237	-3.13979	-4.84765	-0.608202	-0.868438	0.0201569	-0.866443	-0.68072	-1.04079	-0.795283	-1.02626	-1.15714	-1.25739
Q816U4												0.827752	-0.660131	-0.0590642	-0.142344	-0.107002	-0.537567	0.203588	-0.0779832	0.715225	0.32543	-0.478654	0.696384	0.0519392	0.999831	0.999319	0.999822	0.999689	0.971684	0.997301	0.223881	0.531399	0.310116	-2.50174	-1.6686	-1.66604	-4.0199	-3.55694	-3.43554	-2.46596	-2.26724	-2.65155	-2.43886	-2.67404	-2.41248	-2.41268	-3.60258	-1.95304	-2.40016
Q81HF2		+						+			+	0.906822	-1.57487	-0.539232	-0.874099	-0.705079	-0.536303	-1.14532	-1.90516	-0.472679	0.0490716	-1.84078	0.492475	4.16e-05	0.999831	0.999319	0.999822	0.999689	0.0932431	0.00165962	0.394937	0.797908	0.000101127	-1.15837	-1.50329	-1.39608	-4.63659	-3.80449	-3.77409	-2.31408	-2.28441	-1.24481	-2.7916	-2.20143	-2.43141	-2.3922	-2.80003	-3.4299	-3.41369
Q81HT4									+			-0.594013	-0.284686	-0.38489	-0.37911	-2.48683	-0.534485	-0.951393	1.85561	2.83039	0.676485	0.678473	0.759781	0.537515	0.999831	0.999319	0.999822	0.999689	0.811358	0.363938	0.0386658	0.592011	0.735979	-1.75158	-4.36741	-5.07313	-2.67131	-4.15487	-4.15032	-1.2108	-3.7004	-3.56398	-2.94155	-3.14107	-3.51066	-1.46455	-4.49107	-3.81342	-4.94991
Q815G3								+	+	+	+	0.839652	0.474951	-0.803193	0.0407254	-0.056001	-0.526793	1.68911	4.68922	3.8269	3.92791	3.0753	0.656478	0.89765	0.999831	0.999319	0.999822	0.999689	0.0592126	3.01e-08	1.76e-07	8.36e-08	1.39e-05	-1.86863	-3.90621	-3.98043	-2.57251	-4.38752	-4.6017	-3.88572	-3.90002	-3.55359	-4.36757	-4.92853	-4.41625	-3.57016	-4.58211	-3.22141	-2.85959
Q818K7								+	+	+	+	-1.0379	0.615014	-0.197756	-1.48239	-0.401426	-0.519381	0.551349	1.58956	2.25719	2.257	1.60921	0.14695	0.914729	0.999831	0.999319	0.999822	0.999689	0.773441	0.0297286	0.000407077	0.000350169	0.0203748	-2.22882	-4.05204	-2.21398	-1.4205	-1.76087	-1.06708	-1.8225	-1.63637	-0.987368	-1.7502	-2.01933	-1.23341	-3.22928	-3.96932	-1.85131	-1.92391
Q81GL4												0.367757	-0.938621	0.187409	-0.180799	-0.101609	-0.519063	-0.257156	-0.224021	1.01968	0.808079	1.07066	0.987413	0.0136732	0.999831	0.999319	0.999822	0.999689	0.905524	0.941172	0.0742882	0.141053	0.144592	0.819721	0.172632	0.738864	-0.0672913	-0.969731	-1.86325	1.06988	0.347964	0.144993	0.481273	0.844289	0.836068	0.644788	-0.105686	0.324818	-0.0590668
Q81HV9										+	+	-0.719177	-0.351564	-0.468958	-0.23134	-0.142553	-0.516317	-0.11735	-0.507294	-1.37375	-1.96524	-2.2278	0.451658	0.218067	0.999831	0.999319	0.999822	0.999689	0.971684	0.816324	0.0843828	0.014059	0.00239656	-1.52645	-1.27685	-3.91355	-3.36395	-0.114421	-2.848	-1.04904	-1.58552	-0.989866	-1.50078	-2.46677	-1.02719	-0.968026	-1.77428	-1.73266	-1.71767
Q81JC0		+										-1.52972	-1.23405	-0.822465	-0.804519	-0.575155	-0.513278	-0.134577	-0.343054	0.920741	0.974909	1.46505	0.0813932	0.0119726	0.999831	0.999319	0.999822	0.999689	0.9706	0.894085	0.167978	0.136283	0.0735433	-3.5266	-5.55682	-4.09415	-3.65899	-4.26711	-5.07681	-3.5499	-2.68318	-1.42044	-3.31716	-2.78721	-3.97998	-3.47678	-2.40566	-4.34115	-3.76106
Q81GV0		+										0.719445	-2.31048	-0.113093	-1.03792	-0.145233	-0.511984	-0.276468	-0.920497	-0.188675	-0.324681	-0.263648	0.660054	3.85e-07	0.999831	0.999319	0.999822	0.999689	0.810331	0.173775	0.803513	0.593236	0.340108	0.272358	-0.384441	-0.712724	-4.19862	-3.41734	-3.01097	-0.737429	-0.645804	-0.665014	-0.42485	-0.976701	-0.949414	-0.987956	-3.156	-1.17459	-0.826895
Q81CG7		+										-0.0148977	-2.57296	-0.303328	-0.342243	-0.329152	-0.509113	-0.524807	-0.97286	0.224344	0.228159	0.282468	0.57392	1.39e-11	0.999831	0.999319	0.999822	0.999689	0.25465	0.0107057	0.315346	0.281879	0.735757	-1.21622	-1.74024	-1.52102	-4.77582	-3.41314	-4.67508	-1.15089	-1.51487	-0.832144	-1.47576	-1.59653	-1.29904	-1.41694	-1.67175	-1.59246	-1.49665
Q81DZ1		+									+	-0.295353	-1.25401	0.267309	0.359727	0.392609	-0.509102	-0.750077	-0.410247	-0.691247	-1.21345	-1.58859	0.660054	0.0075407	0.999831	0.999319	0.999822	0.999689	0.59157	0.849379	0.360892	0.089825	0.0103797	-3.38748	-1.47784	-2.9117	-2.90198	-4.78671	-3.67665	-1.66397	-2.42158	-1.87053	-1.61042	-1.46179	-2.04537	-1.81458	-1.55508	-1.66374	-1.64215
Q81H29		+							+	+	+	0.356373	-2.89476	0.112869	-0.305176	-0.459717	-0.508849	-0.763376	-0.968781	-2.06396	-3.18882	-3.95159	0.986225	8.44e-09	0.999831	0.999319	0.999822	0.999689	0.307027	0.12339	6.14e-05	6.63e-08	3.82e-10	6.54979	6.49561	6.31226	2.86323	2.57967	3.44902	7.22018	5.64558	6.35767	6.93225	6.51695	6.1494	6.85781	5.53616	5.75742	6.34814
Q81GF8		+						+	+	+	+	0.150133	-3.23877	-0.152838	-0.344458	-0.361327	-0.503399	-0.522662	-1.14562	-2.49147	-2.87367	-3.14966	0.820097	9.58e-13	0.999831	0.999319	0.999822	0.999689	0.286635	0.00422259	1.28e-08	5.36e-10	1.73e-11	1.7313	1.83748	1.70904	-0.799175	-2.47945	-2.32261	1.83089	1.91014	2.02128	1.7206	1.82145	1.79832	1.50725	1.45502	1.61015	1.5113
Q81J33		+							+			-1.31709	-3.32772	0.681508	0.406754	0.315307	-0.496931	-0.299925	1.01647	2.13378	0.256337	-1.68388	0.379378	0.000596404	0.999831	0.999319	0.999822	0.999689	0.945902	0.565161	0.0420362	0.767562	0.0852412	-3.71896	-0.715324	-0.183856	-4.72319	-4.55063	-2.08859	0.618038	0.510474	-0.860495	1.33133	0.642388	0.375384	0.00183201	0.0967426	1.23318	0.39699
Q81FG3									+	+	+	-0.281933	-0.241801	0.226453	0.15808	-0.376624	-0.495835	1.08422	1.6591	3.48639	3.11503	2.04667	0.706662	0.281063	0.999831	0.999319	0.999822	0.999689	0.509932	0.0829407	4.25e-05	0.000136846	0.0161508	-3.47776	-3.42459	-4.2304	-4.05309	-3.41859	-4.25302	-1.91361	-3.6891	-3.74934	-1.78445	-3.09277	-3.75891	-1.57401	-4.14921	-3.31112	-1.80703
Q81F25										+	+	-0.553923	-0.73235	-0.0225951	-0.399421	-0.261761	-0.492625	-1.41128	-0.153271	-1.11574	-1.5873	-1.8091	0.479451	0.048172	0.999831	0.999319	0.999822	0.999689	0.191386	0.969871	0.115437	0.024785	0.00403102	-2.5206	-2.31219	-2.52716	-2.16399	-2.94607	-3.49753	-1.78342	-1.73436	-1.24551	-1.58943	-1.74306	-1.46203	-1.0181	-3.37865	-1.72133	-1.24755
Q814J4								+				0.59433	-0.571676	-0.17002	-0.527921	-0.462522	-0.490427	-0.947929	-1.39451	-0.863494	-0.437173	-0.102969	0.741807	0.00563127	0.999831	0.999319	0.999822	0.999689	0.110571	0.00749912	0.0486591	0.367661	0.495374	0.402632	-0.222412	-0.0344629	-0.684885	-2.60223	-0.777504	-0.281406	-0.341836	-0.0790958	-0.246558	-0.389544	-0.539733	-0.561553	-1.08012	-0.800957	-0.524263
Q815H3									+	+	+	0.280673	-0.174244	-0.198693	-0.43464	0.104003	-0.489889	-1.0688	-1.3296	-2.32511	-1.86353	-1.90272	0.996339	0.35026	0.999831	0.999319	0.999822	0.999689	0.487092	0.282195	0.00639845	0.027273	0.0111835	0.0738449	1.26089	0.448306	-1.23055	1.12208	-0.185593	0.84779	0.452195	0.575935	0.717286	0.572301	0.0268164	0.335219	0.0410118	0.0392437	0.941145
Q81B20								+	+	+	+	0.656686	0.771856	-0.139146	-0.33662	-0.653018	-0.486083	-0.811542	-1.39484	-1.51376	-1.80549	-2.15735	0.398489	0.326609	0.999831	0.999319	0.880151	0.720516	0.00724723	1.8e-05	8.47e-07	3.36e-08	1.28e-10	2.7513	2.56429	2.51965	1.88164	2.89891	2.68785	2.2994	2.42414	2.07654	1.97927	2.34561	2.09433	1.61766	1.98385	2.03219	1.70137
Q819U6		+									+	-0.354006	-1.60021	-0.0189921	-0.526611	-0.522483	-0.485218	-1.77646	-1.32609	-0.206848	-0.751614	-1.76446	0.660054	0.00456358	0.999831	0.999319	0.999822	0.999689	0.121946	0.237694	0.862629	0.365399	0.0113834	-0.908157	-2.23381	-3.17701	-3.34471	-2.95899	-4.46626	-1.22509	-1.74854	-1.34843	-1.55085	-1.56924	-1.22238	-1.46994	-2.96836	-1.62012	-1.7704
Q815Q4		+										0.0355899	-1.09123	-0.200134	-0.0154584	-0.0874736	-0.475222	-0.514044	-0.335486	-0.52331	-0.168008	1.08291	0.807551	0.0013283	0.999831	0.999319	0.999822	0.999689	0.595738	0.833391	0.363488	0.866607	0.0703613	-1.628	-1.7786	-1.89936	-1.50722	-4.05583	-3.83574	-1.51647	-1.8689	-1.09246	-1.66496	-1.86396	-1.51276	-1.44372	-1.33364	-1.90338	-1.5479
Q81G41												0.701937	-0.0699158	0.147247	0.102073	-0.648276	-0.473053	-1.0861	-0.748853	0.234708	0.311345	0.234773	0.872791	0.513559	0.999831	0.999319	0.999822	0.999689	0.595122	0.752246	0.773295	0.69547	0.96046	-0.955261	-2.40095	-0.734778	-3.14348	-3.08902	-0.886396	-2.10541	-2.519	-0.637493	-2.35858	-1.31379	-1.11123	-2.45512	-1.69923	-0.957863	-3.44498
Q815C7											+	0.45534	-0.694864	-0.162021	-1.74365	-1.01852	-0.470374	-2.11159	-1.90866	-1.18736	-1.27466	-2.35395	0.955932	0.132778	0.999831	0.999319	0.999822	0.999689	0.103581	0.102749	0.193907	0.158688	0.00438619	-0.849466	-2.25372	-3.13298	-3.43196	-3.5111	-3.45607	-1.78765	-2.71165	-2.168	-2.54998	-2.02389	-2.54292	-4.24821	-4.8533	-2.95325	-2.28913
Q81AL5		+								+	+	0.454497	-2.59468	-0.0292988	-0.151458	-0.504731	-0.468066	0.269516	-0.30493	0.763321	1.90732	1.86435	0.839792	3.64e-11	0.999831	0.999319	0.999822	0.999689	0.821814	0.694411	0.00801103	2.45e-07	3.46e-06	-0.326147	-0.193829	-0.400098	-2.93149	-3.53519	-4.3133	-0.506069	-0.537589	-0.305012	-0.318168	-0.581634	-0.500203	-0.322059	-1.06833	-0.569185	-0.633097
Q818D5		+										0.0742995	-1.4101	-0.0964095	-0.34673	-0.615374	-0.467082	-0.342234	-0.656253	0.0171967	-0.240017	0.302973	0.794369	1.79e-05	0.999831	0.999319	0.999822	0.999689	0.675697	0.329354	0.848008	0.694575	0.773505	-2.01758	-1.08377	-2.05027	-3.95195	-3.20393	-3.16131	-1.42069	-1.46758	-1.55135	-1.39081	-1.72601	-1.57547	-2.0711	-2.24751	-1.31773	-1.89095
Q817Y3		+										0.661202	-2.6581	-0.405747	-0.454581	-0.321361	-0.461855	-0.405451	-0.655141	0.350366	0.455944	-0.288876	0.617643	2.08e-10	0.999831	0.999319	0.999822	0.999689	0.506955	0.213422	0.220604	0.111621	0.168157	0.0260181	-0.657991	-0.62486	-4.9968	-3.31464	-3.61565	-0.914318	-0.857339	-0.533888	-1.24638	-0.920451	-1.31939	-1.07741	-1.17291	-1.57549	-0.951345
Q817I5		+										-0.0641912	-1.0544	-0.132414	-0.651922	-0.100026	-0.450974	0.0191428	-0.0339743	0.764336	0.719651	-0.703222	0.790917	0.0110638	0.999831	0.999319	0.999822	0.999689	0.985985	0.991318	0.192404	0.20436	0.166039	-0.984762	-2.90582	-3.14578	-2.80384	-4.81694	-3.09859	-1.5286	-2.24486	-2.13543	-1.98773	-2.04735	-2.2345	-2.11215	-3.55816	-2.35087	-1.983
Q816T9		+										0.505133	-1.7582	-0.15234	-0.172876	-0.258709	-0.450415	-0.338535	-0.665613	0.6631	0.695555	0.600153	0.829888	7.09e-07	0.999831	0.999319	0.999822	0.999689	0.642793	0.285224	0.0569931	0.0440099	0.276022	-0.483429	0.0784512	0.00106716	-2.17169	-4.02443	-1.71014	-0.416368	-0.141444	-0.426601	-0.738057	-0.347524	-0.319291	-0.75981	-0.537899	-0.361856	-0.623409
Q81E92												0.303719	-0.139957	-0.175139	-0.797933	-0.678985	-0.450073	-1.44792	-0.982347	0.528817	0.736351	-1.33181	0.997984	0.351941	0.999831	0.999319	0.999822	0.999689	0.264782	0.45564	0.451208	0.283141	0.0506757	-1.79583	-3.21935	-3.78797	-3.35905	-3.83961	-3.64787	-2.43309	-3.40773	-2.93859	-2.86856	-3.34565	-3.05405	-3.05241	-4.12307	-4.15425	-2.6586
Q816F6										+	+	0.337577	-0.80821	-0.150724	-0.159887	-0.359947	-0.448822	-0.581854	-0.733395	0.629267	1.41333	1.31461	0.992932	0.000684983	0.999831	0.999319	0.999822	0.999689	0.365388	0.211232	0.0686058	0.000303292	0.00417672	-0.867193	-0.6548	-0.892524	-1.35387	-3.6696	-1.54076	-0.761904	-1.00554	-0.724913	-0.925437	-1.09185	-0.890674	-0.820884	-1.28364	-1.02401	-1.04976
Q818J3		+										0.233128	-2.88985	-0.178717	-0.236354	-0.383868	-0.44209	-0.46567	-0.620438	0.286512	0.939596	0.849702	0.925648	1.78e-12	0.999831	0.999319	0.999822	0.999689	0.308422	0.149848	0.217779	0.000784704	0.0206634	-0.24563	-0.45108	-0.287278	-3.18728	-4.68701	-3.19098	-0.490974	-0.369283	0.111778	-0.424062	-0.340209	-0.483796	-0.596988	-0.401953	-0.615126	-0.525198
Q81CK6									+	+	+	0.0237853	-0.700481	-0.184036	-0.250434	-0.277119	-0.437553	-0.511425	-0.951647	-3.82844	-4.53682	-6.13935	0.810298	0.015278	0.999831	0.999319	0.999822	0.999689	0.619717	0.229053	5.95e-08	2.03e-09	2.24e-12	0.995237	1.84781	1.82942	0.605776	0.226804	0.954735	1.76709	1.79191	1.97701	1.58963	1.85319	1.57764	1.44188	1.39783	1.78848	1.48895
Q813P4		+										-0.399668	-1.40709	-0.175073	0.195682	-0.679435	-0.432998	-0.574176	-1.18479	0.461658	0.492896	-1.09083	0.723134	0.035729	0.999831	0.999319	0.999822	0.999689	0.837458	0.464037	0.599842	0.551999	0.183279	-1.93736	-2.40646	-4.08173	-3.24967	-4.17974	-4.73078	-1.85907	-2.28911	-2.14346	-1.76931	-3.21336	-1.79764	-1.72957	-2.00468	-2.12688	-1.78909
Q815S5		+									+	0.759772	-1.42401	-0.0495027	0.279594	0.446944	-0.426305	0.37004	0.402475	-0.00619189	-0.400438	-1.90942	0.789612	0.00856196	0.999831	0.999319	0.999822	0.999689	0.927851	0.79493	0.942675	0.672368	0.00691543	-1.93502	-0.95648	-1.11197	-4.11242	-4.22969	-2.92506	-1.46054	-1.24018	-2.64717	-2.47949	-1.37201	-1.60835	-1.04407	-1.20782	-2.41374	-1.25193
Q817X1												-0.168957	-0.484216	-0.199725	-0.139238	-0.933272	-0.425388	-0.704822	-0.794498	-1.02637	-0.744611	-0.983124	0.648869	0.0393568	0.999831	0.999319	0.999822	0.999689	0.457034	0.344105	0.0618906	0.190116	0.0255553	-3.04889	-2.68986	-4.05749	-3.38387	-3.21105	-4.85945	-2.7803	-3.00952	-2.56465	-2.44634	-2.77241	-3.69833	-2.80541	-3.25437	-2.86893	-4.42662
Q81HD6		+							+	+	+	0.153547	-1.60912	-0.130085	-0.0725797	-0.044529	-0.423004	-0.0274677	-0.107126	-2.18528	-2.77857	-1.73953	0.949974	0.0117277	0.999831	0.999319	0.999822	0.999689	0.985985	0.991318	0.0158248	0.0026035	0.0277798	-1.67265	-0.667042	-0.755734	-4.35217	-1.31706	-3.42657	-0.76832	-1.07909	-0.77376	-0.536153	-1.40028	-1.03843	-0.982539	-0.855999	-1.15689	-0.790424
Q81FI5												0.672681	-0.103599	-0.232495	-0.132425	-0.153798	-0.422763	-0.402326	-0.529997	0.322717	0.136554	-0.709867	0.343829	0.00454554	0.999831	0.999319	0.999822	0.92454	0.25579	0.124931	0.0877132	0.341853	0.000327199	-0.586975	-0.780737	-0.791301	-1.85023	-1.82318	-1.5268	-1.12566	-1.12847	-0.988031	-1.36914	-1.13887	-1.39507	-1.12889	-1.25736	-1.40971	-1.18045
Q819K8	+	+										-1.70897	-1.56137	-0.169328	-0.14786	-0.241421	-0.419851	-0.489316	-0.712845	-0.70078	0.165833	0.903577	0.00174186	1.75e-05	0.999831	0.999319	0.999822	0.999689	0.561241	0.318837	0.145989	0.578752	0.0979627	-1.98714	-3.09508	-4.84458	-3.46647	-3.08761	-3.64225	-1.01443	-1.50359	-1.34696	-1.40436	-1.42803	-1.50402	-1.02453	-1.77042	-1.67015	-1.37747
Q81GF4		+							+	+	+	-0.0178363	-2.34923	-0.16521	-0.487418	-0.327925	-0.416332	-0.346926	-0.603088	-2.62146	-3.2371	-3.24044	0.759781	1.52e-06	0.999831	0.999319	0.999822	0.999689	0.776876	0.520181	1.46e-05	4.89e-07	1.4e-07	-0.238783	-1.388	-1.31825	-3.47181	-4.41241	-2.76736	-0.452208	-1.02618	-0.478239	-0.662843	-0.931453	-0.821403	-0.477998	-1.94575	-1.15166	-0.779066
Q819A4								+	+	+	+	0.322049	0.334344	-0.113993	-0.316161	-0.239813	-0.415217	-0.711324	-1.27987	-1.57975	-2.01911	-3.60258	0.997238	0.450974	0.999831	0.999319	0.999822	0.999689	0.0920249	0.00099255	1.15e-05	1.96e-07	6.79e-13	1.07982	0.55892	0.617614	0.612715	0.342875	0.625296	0.681778	0.396758	1.14657	0.918042	0.615449	0.386195	0.688815	0.176664	0.254618	0.661959
Q81CG9		+							+	+	+	0.304206	-3.38176	-0.276809	-0.249345	-0.082269	-0.414275	-0.780661	-1.00871	-1.3064	-1.45123	-1.60887	0.997984	2.63e-10	0.999831	0.999319	0.999822	0.999689	0.260733	0.0845045	0.00442671	0.00178126	0.000119731	-0.64822	0.218023	0.263675	-5.24461	-2.96537	-3.7268	-0.184742	-0.0766039	0.1171	-0.286218	-0.123723	-0.528171	-0.511939	-0.412037	-0.124828	-0.122513
Q81G44								+	+	+	+	0.278068	1.14692	0.0244579	0.325384	0.726351	-0.411693	1.23213	2.45905	4.40145	4.86161	5.37176	0.992932	0.227175	0.999831	0.999319	0.999822	0.999689	0.158071	0.000130402	2.43e-09	2.24e-10	8.55e-11	-2.72315	-3.71712	-3.92105	-3.00203	-2.47746	-2.98765	-3.67373	-3.74273	-2.84417	-3.91626	-3.44257	-2.79186	-3.45698	-3.26438	-2.71964	-3.10833
Q812W7		+										0.0392214	-1.58161	-0.243916	-0.0311362	-0.267638	-0.408414	-0.517876	-0.0181681	0.547818	0.708654	0.775912	0.759781	8.87e-06	0.999831	0.999319	0.999822	0.999689	0.506681	0.979638	0.142709	0.059958	0.155776	-1.34202	-1.72968	-2.11882	-3.80578	-4.77618	-2.1834	-1.41935	-1.78414	-1.1698	-1.97986	-1.4986	-1.59002	-1.51521	-1.48965	-1.61837	-1.76907
Q81I80		+							+	+	+	0.234063	-1.65749	-0.157647	-0.0734889	0.240234	-0.40623	0.165199	-0.241932	1.09624	1.46038	1.7946	0.97023	0.000200322	0.999831	0.999319	0.999822	0.999689	0.981289	0.917155	0.0367144	0.00673106	0.00479528	-0.98468	-1.96394	-2.54724	-4.0956	-3.36739	-4.41988	-2.14694	-1.31979	-1.79643	-1.64833	-1.88725	-2.16396	-1.27426	-2.66152	-1.70437	-1.14391
Q819K9		+							+	+	+	-0.30723	-3.14569	-0.28837	-0.213371	-0.141382	-0.40377	-0.28038	-0.422627	-2.54238	-3.28069	-3.54274	0.337975	1.67e-10	0.999831	0.999319	0.999822	0.999689	0.736343	0.619017	4.11e-07	3.52e-09	2.16e-10	-1.15514	-1.02908	-1.10202	-3.46005	-4.75092	-4.30301	-0.568987	-0.610272	-0.250397	-0.634591	-0.809867	-0.813746	-0.491607	-0.872242	-0.862446	-0.658068
Q819E4												0.481845	0.528401	-0.414177	-0.64381	0.135826	-0.402488	-0.0862595	-1.30414	-0.219486	-0.144465	1.15126	0.949696	0.983051	0.999831	0.999319	0.999822	0.999689	0.984135	0.364312	0.873446	0.946193	0.284878	-1.51553	-4.0376	-3.45409	-4.1244	-4.18959	-1.26592	-1.71771	-4.21782	-3.58234	-4.149	-2.42479	-4.15004	-4.31142	-3.91942	-3.37498	-2.11014
Q81IE6									+	+	+	-0.386968	-0.816714	-0.0508054	0.766026	-0.531596	-0.396745	0.495188	1.35726	3.65252	4.91859	4.74875	0.648869	0.0576025	0.999831	0.999319	0.999822	0.999689	0.872215	0.158778	1.63e-05	1.42e-07	6.5e-07	-4.1909	-3.26523	-3.92423	-3.96869	-4.26625	-5.14701	-2.08801	-3.25671	-3.93984	-4.0102	-2.50245	-2.88777	-1.73156	-3.06021	-2.35122	-3.33655
Q81AC7		+							+	+	+	-1.10906	-1.93398	-0.0949739	-0.269775	-0.272034	-0.396467	-0.401094	-0.417445	-4.11404	-3.26192	4.71576	0.227841	0.00132536	0.999831	0.999319	0.999822	0.999689	0.863534	0.864665	6.02e-06	0.000116185	8.82e-07	-0.372364	-1.82634	-3.82242	-2.03274	-3.64075	-3.53473	-0.707844	-0.617112	-0.434074	-0.41542	-0.578893	-1.01308	-0.179029	-1.44567	-1.10018	-0.55785
Q81D47												1.53974	1.6205	0.790713	0.362549	0.266267	-0.396235	0.717331	0.509735	0.464407	-0.27958	1.08333	0.501687	0.255824	0.999831	0.999319	0.999822	0.999689	0.830028	0.814596	0.607588	0.847708	0.363456	-1.68968	-3.94659	-5.09522	-4.6409	-3.66189	-2.89877	-3.74768	-5.41126	-5.25687	-3.23773	-4.83496	-3.93443	-4.2114	-5.40799	-3.8653	-4.93745
Q813F8								+	+		+	1.13314	-0.796255	-0.360651	-0.259204	-0.146378	-0.395198	-0.557543	-1.50894	-1.59281	-0.00576719	-1.36383	0.327139	0.00781971	0.999831	0.999319	0.999822	0.999689	0.57995	0.0222326	0.00373344	0.89517	0.00335277	-2.11487	-1.04854	-1.01857	-3.76221	-2.24259	-4.67771	-2.28256	-2.20847	-2.15547	-2.80774	-2.52473	-2.35943	-2.54438	-2.43925	-2.597	-2.22128
Q817C6												0.678889	-0.287352	0.118643	0.0241165	-1.32372	-0.393857	-0.5489	-0.496736	0.821303	0.335157	-0.928542	0.839792	0.265933	0.999831	0.999319	0.999822	0.999689	0.789308	0.832845	0.256937	0.599919	0.157641	-1.58113	-1.63174	-4.52547	-4.30621	-3.10327	-3.93994	-1.7888	-3.80488	-3.24643	-2.143	-3.22104	-3.08358	-2.36053	-2.60764	-3.95612	-3.10962
Q81F80		+								+		-0.250018	-2.46906	-0.361752	-0.481972	-0.26254	-0.390886	-0.61694	-0.582911	-0.668694	-1.6896	-0.550657	0.58726	9.71e-07	0.999831	0.999319	0.999822	0.999689	0.524985	0.558521	0.240649	0.00246744	0.154937	-0.572283	-1.23473	-0.428983	-2.51497	-4.11832	-2.97218	-0.114637	-0.287299	-0.149111	-0.375897	-0.347453	-0.876391	-0.383071	-0.927937	-0.84248	-0.252851
Q81A78												-0.0512638	0.79338	-0.374093	0.649064	0.192695	-0.387836	-0.189362	0.0939204	-0.56372	0.353098	0.439048	0.770294	0.664829	0.999831	0.999319	0.999822	0.999689	0.924184	0.941172	0.40095	0.456153	0.671076	-2.9898	-3.28534	-4.78042	-3.40505	-3.90535	-1.92359	-3.43226	-3.73274	-2.80189	-3.40894	-3.24533	-4.39832	-3.25018	-2.81918	-2.10685	-2.95706
Q81G26												0.633965	-0.0800139	0.0492465	0.0484854	-0.27767	-0.384746	-0.0497195	-0.278156	-0.0777524	-0.284915	0.188866	0.794369	0.23731	0.999831	0.999319	0.999822	0.999689	0.981289	0.894183	0.985774	0.71386	0.988692	1.16821	0.559803	-0.0576086	-1.96734	0.114467	0.668989	0.8515	0.176566	-0.324659	0.355876	0.588275	-0.0564432	0.45445	-0.0872631	0.325151	0.251051
Q813R3												0.181854	-0.812835	-0.431356	-1.19184	-0.716739	-0.38418	-0.0453536	-0.265172	-0.49103	-0.571269	0.0120112	0.964682	0.0946303	0.999831	0.999319	0.999822	0.999689	0.985985	0.947495	0.633689	0.561044	0.854146	-1.17207	-3.51671	-4.30492	-4.17423	-5.1265	-3.38938	-2.06451	-3.30709	-3.23277	-3.79678	-3.84087	-2.22422	-2.29985	-4.71335	-5.32321	-3.46252
Q814V8		+										0.513156	-4.95253	-0.199913	-0.185987	-0.147834	-0.383965	-0.380861	-0.299984	0.242798	0.216869	0.347586	0.681362	7.97e-18	0.999831	0.999319	0.999822	0.999689	0.308422	0.578799	0.197367	0.21301	0.493884	1.11332	1.49353	1.50165	-4.56744	-4.72116	-3.71231	1.24319	1.0319	1.22884	0.89022	1.07152	0.979007	1.11457	0.617735	1.05713	0.863283
Q81DK9											+	0.438054	-0.968142	0.222517	0.108754	-0.93321	-0.381852	-0.867545	-0.324231	0.123965	-1.35414	-1.75874	0.966956	0.0654929	0.999831	0.999319	0.999822	0.999689	0.621513	0.92378	0.833464	0.129516	0.0244393	-1.52618	-1.85835	-2.36797	-3.73493	-3.79963	-3.14889	-2.09537	-1.73489	-2.30151	-1.70951	-2.01074	-1.70741	-2.02706	-1.95985	-1.97512	-1.58669
Q812W1		+										1.30536	-1.00057	0.303846	0.36359	0.132114	-0.37872	-1.55321	0.159456	1.07975	1.06082	1.54009	0.410229	0.0225747	0.999831	0.999319	0.999822	0.999689	0.144912	0.91641	0.0966666	0.0957663	0.0504629	-0.591328	-0.227392	-0.378148	-2.52785	-1.61147	-4.68772	-0.697144	-1.96203	-1.51889	-1.13209	-0.928781	-1.1691	-1.16735	-1.39284	-0.683624	-0.869347
Q815J9								+		+	+	0.713132	-0.993457	-0.170289	-0.491012	-0.165634	-0.377258	-0.605978	-1.52032	-0.902226	-1.2159	-1.21298	0.609575	0.00018835	0.999831	0.999319	0.999822	0.999689	0.351008	0.00241666	0.0313715	0.00417486	0.000700485	1.76937	1.58069	1.24992	0.491255	0.0301542	-1.75356	1.20611	0.992892	1.19647	0.964536	1.0337	0.922933	0.664495	0.465439	0.635979	0.89056
Q81FV5												0.213105	-0.831662	-0.216307	-0.20827	-0.187993	-0.374285	-0.534775	-0.729129	-0.456601	-0.572088	-0.806657	0.820311	2.36e-08	0.999831	0.999319	0.999822	0.720516	0.0267942	0.00420861	0.0381243	0.00963527	7.13e-06	3.07286	2.81437	2.66312	1.94284	1.27464	1.48622	3.03343	2.8499	2.96261	2.91848	2.67415	2.64095	2.69155	2.76117	2.61188	2.84008
Q819B4		+							+	+	+	-0.306377	-1.98247	-0.253738	-0.0866362	-0.148025	-0.37309	-0.557065	-0.529207	-2.4517	-2.99448	-1.94702	0.453818	2.93e-06	0.999831	0.999319	0.999822	0.999689	0.515911	0.562313	1.07e-05	4.01e-07	4.39e-05	-0.620272	-2.01318	-1.66834	-3.2431	-3.25502	-3.54431	-0.961172	-1.23633	-0.250269	-1.18246	-1.00418	-0.985778	-0.49043	-1.20263	-1.17114	-1.13907
Q81DD2												0.485347	-1.20991	0.590665	-0.472174	-0.579562	-0.372801	-1.20487	-0.503241	0.218938	0.538022	0.947751	0.949974	0.051514	0.999831	0.999319	0.999822	0.999689	0.506955	0.864665	0.77377	0.508524	0.420231	-0.827379	-2.22139	-2.81122	-4.15102	-3.65358	-3.85352	-0.937155	-2.68009	-2.7639	-2.35369	-1.05025	-1.16864	-3.09539	-3.40306	-1.45574	-3.38764
Q81IH5		+									+	0.0329825	-1.28951	-0.707749	0.248138	-0.787365	-0.372231	-1.02725	-2.32092	-1.37714	-0.125015	2.71664	0.923837	0.0420655	0.999831	0.999319	0.999822	0.999689	0.595306	0.0565761	0.158747	0.960645	0.0077905	-0.268856	-2.22122	-3.95139	-4.81613	-2.88936	-3.41581	-1.47356	-2.78271	-1.34925	-1.98024	-2.26561	-3.44636	0.306823	-3.5264	-1.79805	-1.37196
Q816B3		+									+	0.835343	-1.1677	-0.148857	-0.230068	-0.281566	-0.369105	-0.649283	-0.935122	-0.65786	-0.438524	-1.00928	0.478133	9.16e-05	0.999831	0.999319	0.999822	0.999689	0.334149	0.0999132	0.142424	0.36557	0.00436724	2.03722	1.75072	1.29216	-0.0672035	-1.30682	-0.267355	1.50577	0.838758	1.16443	1.49898	0.693686	0.906278	1.15604	0.538181	0.968004	1.24032
Q81DK5		+										0.40839	2.77546	-0.00908407	-0.119593	-0.152213	-0.367854	-0.179228	-0.0614827	0.503703	0.196339	0.41641	0.935333	7.4e-07	0.999831	0.999319	0.999822	0.999689	0.848622	0.998719	0.124595	0.458054	0.536119	-0.159176	1.25222	1.06686	2.96724	2.83536	2.74617	0.605915	0.612906	0.650805	0.434634	0.983247	0.461055	-0.00892735	0.36179	1.00146	0.139456
Q816H3		+							+	+	+	0.696181	1.17818	0.221214	0.122279	0.0698999	-0.367226	-0.260745	-0.0773176	1.29413	1.20549	1.37267	0.485737	0.0320936	0.999831	0.999319	0.999822	0.999689	0.630647	0.991318	5.94e-05	0.000105012	0.000262705	1.80012	1.96619	1.77899	1.67372	2.13316	2.47207	1.39254	1.71459	1.28451	1.70157	1.78218	1.6081	1.10005	1.71335	1.78856	1.2394
Q81HN4								+	+	+	+	0.857055	1.01855	0.053695	-0.31009	-0.578123	-0.366517	-0.654191	-1.133	-1.28182	-1.41794	-2.26519	0.230296	0.0932419	0.999831	0.999319	0.999822	0.999689	0.118429	0.00296301	0.000151011	3.98e-05	2.72e-09	2.28861	1.37433	1.38876	1.61557	1.45591	1.75237	1.18531	1.354	0.876131	1.02158	1.4196	1.17191	0.371184	0.75526	1.2022	0.558022
Q817V9								+	+	+	+	0.221555	0.428713	-0.252135	-0.428304	-0.277505	-0.366147	-0.772785	-1.50894	-3.19845	-4.81651	-5.25132	0.939319	0.739585	0.999831	0.999319	0.999822	0.999689	0.186411	0.00191888	4.96e-09	1.08e-12	5.77e-14	3.9511	4.97111	5.01405	4.21401	4.94581	4.68555	4.63994	4.895	4.67155	4.03838	4.94628	4.50198	3.71061	4.28925	4.76518	4.09318
Q812T3		+									+	0.234373	-2.41234	-0.113073	-0.459719	-0.0256672	-0.366102	-1.10099	-0.557079	0.039793	0.149057	-1.46779	0.969949	3.53e-06	0.999831	0.999319	0.999822	0.999689	0.225772	0.628596	0.856605	0.683078	0.00363548	-1.04809	-0.777607	-0.981479	-2.30512	-4.76842	-4.38613	-1.02098	-0.734824	-0.819605	-0.963977	-0.807435	-1.10665	-1.44835	-1.10127	-1.56147	-0.871351
Q814U4		+										0.869615	-1.93827	-0.255589	-0.100119	-0.401383	-0.362909	-0.317243	-0.0861549	0.51109	0.666008	0.712035	0.187081	5.15e-10	0.999831	0.999319	0.999822	0.999689	0.506955	0.988825	0.0367144	0.00815296	0.0546355	-0.441008	-1.31693	-1.02894	-4.10869	-3.6512	-4.163	-1.37066	-1.41268	-1.6775	-1.71545	-1.45173	-2.02385	-1.3139	-1.80024	-1.80358	-1.73509
Q81CA3		+							+	+	+	0.313836	-1.52177	0.00873311	-0.574432	-0.351887	-0.360065	-1.34946	-0.93321	-2.8293	-4.1351	-3.65563	0.997984	0.000235606	0.999831	0.999319	0.999822	0.999689	0.0833397	0.25217	9.16e-06	1.37e-08	4.08e-08	5.23452	5.37618	5.4981	3.88802	2.05862	3.94298	5.24669	5.9399	4.9156	5.59855	5.36351	5.20289	4.84721	4.29503	5.08013	5.12682
Q81F61								+	+	+		-0.0211525	-0.291779	-0.501659	0.340452	-0.399626	-0.359798	2.23154	4.22386	5.36236	4.13339	1.56683	0.925824	0.476175	0.999831	0.999319	0.999822	0.999689	0.319488	0.00441227	7.28e-05	0.00105822	0.257543	-3.77167	-6.70751	-3.8422	-6.66574	-6.56355	-2.61632	-3.52235	-6.56388	-3.2368	-5.59969	-2.879	-6.31275	-4.1717	-5.50509	-2.78141	-6.18607
Q81F00											+	1.12728	-0.0154972	-0.192605	-0.441688	-0.17398	-0.356384	-0.753574	-0.769655	0.084973	-0.811555	-1.10554	0.326306	0.238073	0.999831	0.999319	0.999822	0.999689	0.377271	0.34337	0.774716	0.134996	0.0112838	-0.746733	-0.342947	-0.535216	-1.21202	-3.04027	-1.5133	-1.10619	-1.74356	-1.2221	-1.85962	-1.39308	-1.3604	-1.34186	-1.91317	-2.2984	-1.3371
Q817H8		+									+	0.570375	1.30855	-0.200722	-0.14932	-0.273041	-0.35362	-0.427217	-0.769346	0.186611	0.817556	1.17635	0.648272	0.00550223	0.999831	0.999319	0.999822	0.999689	0.320827	0.0395247	0.358483	0.00167466	0.00061783	1.37524	1.48154	1.91239	1.61118	2.06468	2.5955	1.15066	1.26369	1.57858	0.898286	1.24325	1.2858	0.728854	1.32625	1.33335	0.873222
Q81FV3		+								+	+	-1.1898	-1.58058	0.348363	-0.0165335	-1.00717	-0.349309	-0.731202	-0.633133	-0.701962	-2.15983	-1.76375	0.327139	0.0194421	0.999831	0.999319	0.999822	0.999689	0.747278	0.79746	0.508458	0.0254341	0.037196	-6.0709	-1.69965	-2.80493	-3.70572	-4.94212	-3.81234	-2.04196	-2.09613	-1.9331	-1.7443	-1.69389	-1.55135	-1.56267	-2.47404	-2.2406	-4.6763
Q816W9												0.313228	0.257634	-0.270086	-0.296674	-0.438157	-0.343401	-0.699713	-0.973619	-0.126176	0.420078	0.693069	0.997984	0.28858	0.999831	0.999319	0.999822	0.999689	0.0853604	0.0101596	0.847147	0.079487	0.0735433	1.11366	1.00768	1.30414	1.03552	-0.0584803	1.56929	0.994698	0.939256	1.48673	0.719687	0.948842	0.978457	0.689059	0.842545	0.842531	0.592459
Q812W4		+							+	+	+	0.357133	-1.87535	-0.241053	-0.162419	-0.201923	-0.342367	-0.72591	-0.945911	-2.95672	-4.49621	-3.7804	0.979294	5.09e-07	0.999831	0.999319	0.999822	0.999689	0.261317	0.0876208	4.74e-08	1.18e-11	1.01e-10	-0.0757599	-0.306561	-0.562201	-2.37494	-3.59441	-2.38498	-0.252144	-0.652415	-0.176466	-0.485274	-0.825532	-0.456815	-0.404689	-0.589098	-0.73102	-0.468052
Q81FS4												-0.529652	-0.841743	0.17687	0.326837	0.367524	-0.341957	-0.701862	0.623152	1.24245	1.22984	0.173265	0.543573	0.0429791	0.999831	0.999319	0.999822	0.999689	0.62617	0.585776	0.0634414	0.0631413	0.993842	-4.93423	-3.92707	-2.20529	-3.81681	-5.29199	-3.60642	-2.19531	-4.40153	-1.9459	-2.28101	-2.13289	-3.56166	-2.58292	-2.52428	-2.61155	-2.76161
Q818Z0		+										0.0147381	-1.76143	-0.418928	-0.356874	-0.317424	-0.334529	-0.420779	-0.84795	-0.215017	0.433701	-0.762379	0.695607	3.1e-07	0.999831	0.999319	0.999822	0.999689	0.528277	0.102749	0.700769	0.156231	0.0115109	-0.95446	-1.46278	-1.8161	-4.20417	-3.30544	-2.76458	-0.99057	-1.43021	-0.921888	-1.30331	-1.70055	-1.55902	-0.908141	-1.72337	-1.9383	-1.2382
Q814E2									+	+	+	-0.119387	0.109938	-0.591566	0.624141	0.401673	-0.332257	0.346069	-0.346845	7.90142	7.52969	7.08894	0.87379	0.680066	0.999831	0.999319	0.999822	0.999689	0.97094	0.942504	5.51e-08	8.96e-08	4.72e-07	-5.5314	-5.58437	-4.55061	-4.20206	-4.03241	-7.45628	-4.82387	-6.47394	-3.07552	-4.59165	-5.7518	-5.76801	-3.78508	-5.6942	-3.17814	-4.75963
Q815T6											+	0.361677	-0.544913	0.089798	-0.191408	-0.116095	-0.332139	-0.841389	-0.843767	-0.118774	-0.396422	-1.47041	0.992932	0.102929	0.999831	0.999319	0.999822	0.999689	0.535173	0.492146	0.947041	0.64986	0.019612	-0.350454	-1.80782	-1.57385	-2.02794	-4.09244	-1.04387	-0.750822	-1.31575	-1.81569	-1.23463	-1.07341	-1.26826	-0.893868	-2.25701	-1.46213	-1.27868
Q81DF9		+										0.421619	-1.12751	-0.345619	-0.45558	-0.166546	-0.328135	0.287223	0.0105979	0.94806	0.711728	0.634403	0.939319	0.000357651	0.999831	0.999319	0.999822	0.999689	0.904201	0.958782	0.0237353	0.0731984	0.31042	-1.84552	-1.81521	-1.9282	-2.19374	-4.41591	-4.33903	-1.83442	-2.59612	-1.48835	-2.07802	-2.35962	-2.48155	-2.1851	-2.73492	-2.52214	-2.03909
Q81G24												-0.368958	-0.948997	-0.145798	-0.11155	-0.211576	-0.328004	-0.192622	-0.678275	-0.89432	-0.78294	-0.0750682	0.180049	4e-05	0.999831	0.999319	0.999822	0.999689	0.797469	0.174877	0.0136494	0.0329847	0.451044	-2.00615	-2.3297	-3.51125	-3.9712	-3.71726	-2.61113	-1.98389	-1.95553	-1.86593	-2.30593	-1.9044	-1.99584	-1.82888	-2.22697	-2.24066	-2.08937
Q81FU0		+										0.114428	-2.62362	0.186426	-0.073541	-0.168156	-0.327243	-0.431166	-0.521515	-0.687509	-0.818602	-0.469624	0.83048	4.8e-09	0.999831	0.999319	0.999822	0.999689	0.566682	0.470796	0.114971	0.0598846	0.100934	-0.357323	-0.372391	-1.59956	-3.09977	-4.7831	-3.3729	-0.602119	-0.47433	-0.661217	-0.551175	-0.236596	-0.354054	-0.499505	-0.928755	-0.686554	-0.629448
Q818P4		+							+	+	+	0.501955	-1.00356	-0.0287921	-0.106887	0.312386	-0.325441	-0.971051	-0.571263	-1.79869	-2.21944	-2.3229	0.939319	0.0494709	0.999831	0.999319	0.999822	0.999689	0.554764	0.79311	0.0343869	0.0097612	0.00312259	-3.11945	-1.31399	-2.34149	-3.41941	-4.20955	-4.37486	-2.08606	-2.53606	-2.72378	-1.83705	-2.73726	-2.8214	-1.89015	-4.40562	-1.52731	-1.52007
Q81JA6												-0.881304	0.678603	-0.158947	-0.158195	0.260754	-0.322455	-0.749011	-0.367311	-0.374933	-0.217071	-0.321727	0.187285	0.826044	0.999831	0.999319	0.999822	0.999689	0.506955	0.849379	0.620976	0.825657	0.407044	-3.83715	-4.56624	-4.11471	-3.0249	-4.00164	-1.52419	-3.31255	-2.78069	-2.84605	-3.23222	-3.0497	-3.09764	-3.26068	-3.50682	-2.8029	-3.11184
Q81HI6										+		0.719141	1.27444	0.0306409	0.209885	0.0268205	-0.320023	-1.55868	-0.617952	-1.43059	-3.23791	-2.13341	0.900682	0.533117	0.999831	0.999319	0.999822	0.999689	0.509932	0.866626	0.25668	0.00970357	0.0554357	0.741692	2.05892	2.06254	2.51761	1.89538	1.40369	1.64968	1.41519	0.575756	1.00897	1.28476	1.47539	1.37956	1.39937	1.33483	1.0697
Q814Q7		+								+		2.18163	7.66709	0.105372	-0.513429	-0.354673	-0.317535	1.01357	0.606904	1.68409	1.86904	-0.930432	0.224317	3.14e-08	0.999831	0.999319	0.999822	0.999689	0.679446	0.765698	0.0741039	0.0473182	0.260835	-0.621019	-0.424459	-0.490975	4.2717	5.09684	4.839	-2.4854	-2.86973	-1.79132	-2.23877	-2.50931	-2.0457	-2.46607	-3.59378	-2.78342	-2.24669
Q81J93								+	+	+	+	0.222298	-0.0550474	-0.13018	0.0760841	-0.0490576	-0.317456	-0.63757	-1.04827	-2.09575	-2.86659	-3.18456	0.865173	0.00558239	0.999831	0.999319	0.999822	0.999689	0.0250068	0.000361347	6.66e-10	8.6e-13	1.5e-14	4.06683	4.81062	4.9131	4.12566	4.00976	4.11074	4.59885	4.6543	4.8054	4.53165	4.65627	4.51666	4.69109	4.66773	4.77146	4.78262
Q817E4		+									+	0.250903	-1.85574	-0.251786	-0.182699	-0.171349	-0.314136	-0.922761	-0.161168	0.29171	-0.372506	-1.16491	0.985344	0.000153772	0.999831	0.999319	0.999822	0.999689	0.36887	0.958782	0.560422	0.620364	0.0244291	-1.71916	-1.9523	-1.96311	-4.08774	-4.45781	-4.1213	-1.90081	-1.92664	-1.62494	-2.27387	-1.93551	-1.9618	-1.96739	-2.19157	-1.99805	-1.83849
Q81I19										+		0.148097	0.431327	-0.557965	-0.265732	-0.720654	-0.30935	-1.11015	-0.858975	-1.48106	-2.04398	-0.823211	0.939319	0.870921	0.999831	0.999319	0.999822	0.999689	0.386652	0.501347	0.0506126	0.00776513	0.166533	-1.97364	-3.97146	-3.38309	-2.9656	-3.17517	-3.05008	-2.71108	-3.72612	-2.40039	-3.84776	-3.05443	-3.57273	-2.02439	-3.51121	-4.2557	-2.47843
Q81HL7		+							+	+	+	-0.102164	-1.07223	0.0316874	-0.0131505	-0.337177	-0.308135	-0.372782	0.0472081	-2.67609	-4.24186	-4.47387	0.666676	0.00100755	0.999831	0.999319	0.999822	0.999689	0.711793	0.947495	4.71e-06	1.34e-09	1.62e-10	0.107912	0.266268	0.523089	-1.17501	-0.916503	-0.633772	1.53457	1.22952	-0.625435	0.758075	0.890189	0.622016	0.858388	0.511061	0.573231	0.796806
Q819B3		+							+	+	+	-0.263821	-3.55155	-0.087417	-0.0131181	-0.0699043	-0.307396	0.14808	-0.132182	-1.30567	-2.01094	-2.36764	0.379378	1.67e-11	0.999831	0.999319	0.999822	0.999689	0.971684	0.958782	0.00196948	1.12e-05	1.71e-07	-1.11246	-0.879101	-1.51043	-4.91165	-4.37849	-4.78738	-0.571325	-0.683372	-0.520931	-0.58196	-0.699901	-0.719457	-0.68484	-0.416843	-0.869823	-0.473362
Q816T2									+			0.864162	-0.900581	-0.0276642	0.0825793	-0.941037	-0.30711	-0.570027	0.1068	1.23086	-0.0480652	0.61515	0.660054	0.0178723	0.999831	0.999319	0.999822	0.999689	0.659439	0.941172	0.0374857	0.961247	0.494527	-1.37121	-1.35792	-1.36869	-3.36085	-3.46251	-3.28105	-1.84574	-1.82547	-2.0842	-2.32145	-1.8062	-1.6742	-1.99446	-1.87926	-1.79048	-1.91904
P62171		+							+	+	+	0.123808	2.02253	-0.00446955	0.381067	0.18925	-0.3065	0.0404212	-0.472216	-1.31239	-1.31584	-1.06516	0.729736	1.46e-06	0.999831	0.999319	0.999822	0.999689	0.985985	0.277047	2.47e-05	2.21e-05	2.17e-05	0.60844	0.290571	0.669412	2.64257	2.06695	1.84272	0.909458	0.594945	0.627491	0.534755	1.02643	0.593867	0.767043	1.2046	1.14693	0.873518
Q81A04								+	+	+	+	0.154387	-0.785297	-0.254624	-0.114922	-0.143646	-0.297346	1.09227	2.34067	3.98702	3.68015	3.51247	0.925472	0.0144698	0.999831	0.999319	0.999822	0.999689	0.296756	0.000555562	4.45e-08	1.18e-07	8.84e-07	-1.58858	-2.75013	-2.31442	-1.8215	-4.34252	-4.02051	-1.52944	-2.43215	-2.21979	-2.05723	-2.19359	-2.65788	-1.32872	-2.91117	-2.44279	-2.4278
Q816C9		+							+	+	+	-0.179129	-1.96236	-0.239651	-0.28224	-0.353789	-0.29677	-0.183588	-0.217293	1.12372	1.64646	1.73441	0.187123	3.44e-11	0.999831	0.999319	0.999822	0.999689	0.669909	0.792294	2.14e-05	5.5e-08	3.33e-07	-0.924212	-1.7333	-1.69918	-3.51962	-3.62877	-3.27034	-0.924883	-1.19132	-0.768204	-0.919391	-1.15097	-1.49644	-1.1352	-1.45387	-1.29858	-0.991507
Q81E36									+	+		0.0490278	-0.859972	0.491739	-0.295169	-1.17139	-0.295926	-0.652899	1.0824	3.025	2.56044	1.82762	0.924474	0.101309	0.999831	0.999319	0.999822	0.999689	0.776876	0.410267	0.00108159	0.00413366	0.0661696	-1.21598	-2.60203	-3.08102	-4.35582	-3.44441	-2.53815	-1.02783	-2.84481	-2.23857	-1.30563	-1.16466	-2.12915	-1.27315	-3.9443	-1.9358	-1.40826
Q81AR0											+	0.400733	-0.540426	-0.0160497	-0.12513	-0.555719	-0.295499	-0.267928	-0.747362	-0.471268	-0.985867	-1.53806	0.939319	0.00839801	0.999831	0.999319	0.999822	0.999689	0.782564	0.251444	0.333557	0.0292329	0.000162716	-2.11675	-2.19584	-1.8775	-3.12709	-2.88087	-3.71796	-2.13618	-1.96772	-2.35349	-2.09545	-2.15845	-2.21508	-2.31058	-2.80174	-1.87698	-2.73046
Q816Z8		+							+	+		0.292794	-1.35147	-0.580301	0.327202	0.5354	-0.293935	-0.658497	0.0949573	2.14169	1.7053	0.406988	0.997984	0.00902499	0.999831	0.999319	0.999822	0.999689	0.677457	0.949475	0.00365257	0.0158262	0.769495	-1.04822	-1.90849	-1.80096	-3.79689	-3.34371	-3.26223	-1.62036	-2.50792	-0.572874	-2.88236	-1.50899	-2.01414	-0.815459	-1.21181	-1.8488	-1.22871
Q813K9		+								+	+	0.400706	-1.64887	-0.247063	-0.141044	-0.340243	-0.293147	-0.283918	-0.0470085	0.769032	1.4056	1.47429	0.939319	3.82e-07	0.999831	0.999319	0.999822	0.999689	0.681542	0.991318	0.0191288	0.000124168	0.000586591	-1.21685	-1.70867	-1.78557	-4.44989	-2.96369	-4.15859	-1.54071	-2.05112	-1.38649	-1.52039	-2.20443	-1.95812	-1.44564	-1.98399	-2.12834	-1.69974
Q814S7									+	+		0.371377	-0.316102	-0.218951	-0.0698032	-0.202435	-0.290357	-0.316956	-0.632559	-1.62838	-1.49033	0.604882	0.925472	0.00013025	0.999831	0.999319	0.999822	0.999689	0.319488	0.0303785	3.4e-08	1.38e-07	0.0438147	2.39034	1.93956	1.99286	1.48178	0.92743	1.13875	2.29775	1.61037	2.2354	1.78063	1.95695	1.78566	2.13834	1.78581	1.85343	2.00776
Q81DY8		+									+	-0.272167	-4.34558	-0.133144	-0.231444	-0.83562	-0.289855	-0.999571	-0.0100492	0.454099	-0.356459	-1.35286	0.304163	5.12e-14	0.999831	0.999319	0.999822	0.999689	0.0315609	0.958782	0.127902	0.41178	6.3e-05	0.429743	0.793795	1.08	-3.70129	-2.93864	-3.98913	1.59235	1.29839	1.16419	0.83978	1.70002	1.15225	1.03651	1.07243	1.09513	0.809299
Q81DC9										+	+	0.248917	0.91822	-0.0501893	0.0236473	-0.107252	-0.289846	-0.128253	0.0056839	0.713214	1.34755	2.22112	0.892671	0.0322313	0.999831	0.999319	0.999822	0.999689	0.634011	0.890273	7.96e-05	5.43e-09	5.35e-12	0.528931	0.695312	0.795011	0.755375	1.08901	1.47042	0.579124	0.788508	0.839764	0.578679	0.693427	0.821284	0.577088	0.697161	0.847565	0.600517
Q812I3		+									+	0.239744	-2.22815	0.279578	0.301669	-0.412543	-0.289159	0.017807	0.102317	0.419769	-0.254749	-1.16139	0.979294	6.38e-05	0.999831	0.999319	0.999822	0.999689	0.985985	0.941172	0.454623	0.791774	0.0356743	-0.56155	-1.20943	-1.2523	-4.03116	-3.61119	-3.49698	-0.660946	-0.722714	-1.42396	-0.767293	-0.579888	-0.585139	-0.442861	-0.831438	-0.784834	-0.868557
Q817W5		+										0.372618	-1.84937	-0.0288035	-0.113466	-0.0382716	-0.288785	-0.152199	-0.339788	0.839678	0.808969	0.113705	0.957607	2.43e-07	0.999831	0.999319	0.999822	0.999689	0.883369	0.728331	0.0168982	0.0187225	0.870705	0.0112228	-0.0552673	-0.48236	-3.63114	-2.91028	-1.36329	-0.254801	-0.452888	-0.00167465	0.102839	-0.427831	-0.43422	-0.279399	-0.647144	-0.279743	-0.187752
Q81I33												-0.761157	-0.893454	-0.803983	0.0413087	-0.476039	-0.287863	-0.418423	-0.0753835	-0.422298	0.0037988	0.517092	0.180049	0.00565153	0.999831	0.999319	0.999822	0.999689	0.71049	0.997301	0.509501	0.88399	0.528333	-2.71858	-4.21429	-2.30558	-2.96362	-4.02241	-3.36167	-2.00336	-1.96599	-2.05073	-2.21674	-4.14333	-2.0354	-2.09623	-1.88512	-2.07134	-2.73568
Q81GH8		+							+	+	+	-0.376417	-8.06037	-0.169875	-0.0906563	-0.0501391	-0.285882	-0.375924	-0.905092	-2.34649	-3.16098	-4.58284	0.133774	9.4e-20	0.999831	0.999319	0.999822	0.999689	0.47441	0.0260379	2.86e-08	6.81e-11	9.64e-15	4.09196	4.6025	4.68876	-3.94323	-3.52321	-2.91455	5.22332	4.91368	5.31036	5.23045	4.88175	4.86208	4.95862	4.93766	5.12259	5.116
Q819D0		+										0.436921	-1.93887	-0.0478128	-0.205065	-0.250491	-0.284658	-0.236689	-0.714268	-0.305489	-0.166995	-0.378656	0.903112	1.4e-07	0.999831	0.999319	0.999822	0.999689	0.782564	0.214196	0.539492	0.824517	0.136606	1.24802	0.698671	0.592345	-1.76915	-2.97145	-0.560091	0.707939	0.678426	0.776804	0.548987	0.85131	0.655995	0.585399	0.327774	0.478275	0.376904
Q818D1	+	+										1.23817	-2.42483	-0.286971	-0.0695184	0.057972	-0.280315	-0.12459	0.0882301	0.977661	0.640265	0.273905	0.0153767	3.31e-12	0.999831	0.999319	0.999822	0.999689	0.814745	0.806798	0.000197953	0.00606244	0.727552	0.308615	0.0676479	0.378659	-3.00723	-3.94337	-3.99582	-0.677582	-1.05239	-0.294704	-0.959729	-1.12073	-0.768573	-0.807076	-1.00108	-0.5816	-0.624243
Q814Y6		+							+	+	+	0.616929	-1.02394	-0.333764	-0.15406	-0.243987	-0.2802	0.259858	0.757963	1.92476	1.90154	1.81931	0.183452	2.46e-11	0.999831	0.999319	0.999822	0.729934	0.506955	2.44e-05	1.06e-12	5.44e-13	1.56e-11	0.529146	0.466154	0.478118	-1.36473	-1.2641	-1.53272	0.0798683	0.229346	0.248312	-0.227443	-0.190278	0.0105181	-0.0550966	0.0251331	-0.0312138	-0.0206547
Q813A3		+							+	+	+	0.236684	-2.94763	-0.12551	-0.171317	-0.540148	-0.278186	-0.332339	-1.02509	-2.21023	-3.42626	-4.41674	0.969949	1.66e-07	0.999831	0.999319	0.999822	0.999689	0.810331	0.193165	0.000234007	4.29e-07	1.71e-09	0.311449	-0.231834	-0.368882	-3.90702	-2.90173	-3.74581	0.216822	-0.335607	0.0543613	0.193837	-0.388108	-0.21012	0.0344038	-0.300474	-0.468828	-0.169245
Q818E1	+											-3.7592	-0.227655	-0.0439943	0.306573	0.344772	-0.277768	0.606445	0.172536	0.242947	-0.147531	0.272309	0.000234435	0.246675	0.999831	0.999319	0.999822	0.999689	0.782162	0.913385	0.674174	0.925204	0.902968	-0.44129	-4.57128	-3.19524	0.800648	0.754172	0.119654	0.891397	1.69996	1.41333	0.652511	1.90621	1.35055	1.68124	1.71301	1.37362	1.48305
Q81J41		+							+		+	0.184615	-2.44532	-0.166947	-0.146648	-0.127134	-0.2768	0.199696	0.541335	1.0665	0.898583	1.19276	0.823025	1.43e-12	0.999831	0.999319	0.999822	0.999689	0.879669	0.0516691	4.81e-05	0.000245371	0.000172597	4.65844	3.96702	3.98798	0.959528	1.74187	1.30987	4.29301	4.09235	4.60913	4.20211	4.30861	4.01949	4.01496	4.10012	4.28295	4.06458
Q813S3		+							+		+	0.515321	-1.52028	0.257896	0.21399	0.059288	-0.27647	-0.0329952	-0.256224	-1.10081	0.774083	1.02488	0.810298	2.4e-06	0.999831	0.999319	0.999822	0.999689	0.971684	0.848356	0.00688064	0.0229887	0.0245465	-1.34877	-1.54593	-2.09879	-4.09945	-4.25614	-3.45706	-1.2762	-2.94194	-1.38642	-1.46406	-1.79035	-1.53989	-1.37011	-1.84765	-1.90135	-1.95559
Q819H2		+							+	+	+	0.556949	-1.23676	-0.161503	-0.10914	-0.211388	-0.275984	0.161018	0.135073	1.38484	1.69233	1.37348	0.706662	1.83e-06	0.999831	0.999319	0.999822	0.999689	0.945902	0.792294	4.89e-05	2.54e-06	0.000440867	0.202393	-0.948484	-0.803527	-2.38509	-2.23951	-3.01851	-0.688183	-1.28461	-0.31278	-0.787385	-0.967547	-0.978587	-0.623664	-0.923704	-1.22215	-0.829876
Q81HX0											+	0.0360578	-0.881451	-0.0616474	-0.283881	-0.185676	-0.274111	-0.245803	-0.358866	-0.598336	-0.265992	2.49634	0.660054	3.1e-05	0.999831	0.999319	0.999822	0.999689	0.676534	0.596566	0.0842485	0.543974	2.2e-08	-1.6956	-2.14662	-2.78193	-3.06421	-4.28768	-2.73713	-2.08174	-2.19824	-1.51744	-2.08472	-1.92566	-1.93542	-2.16724	-2.27429	-2.36406	-1.97755
Q81FY8		+										-0.323458	-1.17082	-0.275462	-0.154022	-0.313041	-0.272195	-0.0194829	-0.111485	-0.405568	-0.892682	0.0434068	0.0701863	2.78e-08	0.999831	0.999319	0.999822	0.999689	0.945902	0.954211	0.150221	0.00104742	0.577472	2.40028	2.01929	1.81984	1.21537	1.41245	0.357126	2.72317	2.64422	2.77729	2.47373	2.48404	2.39708	2.69011	2.44429	2.39168	2.40189
Q814G6												0.240985	-0.160027	-0.0815976	-0.0485674	-0.173318	-0.271742	0.0494232	0.152468	0.725453	0.575212	0.589305	0.925472	0.00450121	0.999831	0.999319	0.999822	0.999689	0.991494	0.632492	0.00229712	0.00966362	0.0991596	0.478113	0.649481	0.824847	0.173073	0.397403	-0.533424	0.751699	0.561511	0.851171	0.448087	0.706677	0.801387	0.633273	0.591919	0.636963	0.351768
Q81G60		+										0.500872	-1.6431	-0.0305341	-0.349222	-0.211131	-0.270929	0.0817801	-0.0570316	0.750667	0.903222	0.0356286	0.865858	2.46e-05	0.999831	0.999319	0.999822	0.999689	0.988567	0.998719	0.0780389	0.0351287	0.770881	-2.5601	-2.01998	-1.43888	-3.72152	-4.8026	-4.63909	-2.23877	-1.88611	-2.4618	-2.29425	-2.2756	-2.07187	-1.95206	-3.78559	-2.05321	-2.64728
Q81DT6		+							+	+	+	-0.258621	-4.6685	-0.011858	-0.102304	-0.123999	-0.270101	-0.548592	-0.999654	-2.10363	-2.74673	-3.80071	0.130612	2.86e-17	0.999831	0.999319	0.999822	0.999689	0.121311	0.00244132	7.07e-09	2.55e-11	7.69e-15	3.83661	4.3176	4.38097	-0.252861	-0.687629	-0.466343	4.9362	4.40153	4.90821	5.03465	4.54628	4.66599	4.72157	4.59407	4.46685	4.70741
Q819T7		+										0.353359	-3.29481	-0.0623862	-0.0635014	-0.140541	-0.268369	-0.0453256	-0.0320193	0.469126	0.429748	0.251731	0.99295	2.13e-06	0.999831	0.999319	0.999822	0.999689	0.984135	0.991318	0.446735	0.456902	0.923152	1.25873	1.62147	1.61768	0.346512	-4.27184	-3.23366	1.01703	1.50714	1.84853	1.1779	1.61055	1.43366	0.841102	1.6488	1.53577	1.06382
Q812U4									+	+	+	0.345917	-0.664451	-0.168948	-0.0529156	-0.17448	-0.268128	-0.366702	-0.778519	-2.76213	-3.50214	-3.50241	0.966956	5.8e-06	0.999831	0.999319	0.999822	0.999689	0.308422	0.0128808	1.22e-11	7.24e-14	9.16e-15	0.460493	0.501455	0.527316	-0.103483	-1.11175	-1.03896	0.321302	0.397672	0.667433	0.304927	0.211398	0.3998	0.443231	0.311998	0.315907	0.360653
Q81DW3		+							+			-0.965515	-1.97718	-0.062158	-0.3142	0.0529919	-0.268113	-0.461498	-0.702052	-2.11436	0.613562	0.802195	0.136953	4.93e-05	0.999831	0.999319	0.999822	0.999689	0.71008	0.485898	0.000707358	0.215598	0.272655	-1.33804	-2.17478	-3.63066	-3.80622	-4.35639	-2.72821	-1.04188	-1.6553	-0.614872	-1.30324	-1.36287	-0.79585	-1.2787	-1.73959	-1.39288	-1.08049
Q814N5									+	+	+	0.0194683	-0.740807	-0.165001	-0.352091	-0.0980422	-0.267146	-0.338264	-0.814878	-2.77616	-3.47866	-3.68632	0.645046	9.57e-05	0.999831	0.999319	0.999822	0.999689	0.530044	0.0516691	1.54e-09	1.17e-11	8.5e-13	2.00237	2.09797	2.48361	0.976879	1.20027	1.41362	2.53077	2.37169	2.55799	2.14918	2.35704	2.49578	1.90376	1.67231	2.67156	2.2164
Q817Y2												0.0845718	-0.728107	-0.142008	0.00713157	-0.15829	-0.266139	-0.270998	-0.343705	-0.652305	-0.790737	-0.222333	0.648869	5.15e-06	0.999831	0.999319	0.999822	0.999689	0.506955	0.472368	0.0171511	0.00424901	0.0979627	2.10431	1.55751	1.8054	0.967327	0.14977	1.19974	1.97148	1.89978	2.27715	1.79821	2.00296	1.95777	1.92208	2.101	1.9902	1.85788
Q815S8		+						+	+	+	+	-0.234039	-3.76999	-0.121759	-0.0760988	-0.163549	-0.265586	-0.302018	-1.00146	-1.38689	-1.30288	-1.77349	0.210747	1.14e-14	0.999831	0.999319	0.999822	0.999689	0.541862	0.00692467	3.65e-05	8.1e-05	8.53e-08	-0.30237	0.456179	0.838405	-3.80394	-3.03791	-3.48614	0.483727	0.878972	1.26653	0.629609	0.893632	0.777268	0.585662	0.87438	0.784361	0.547037
Q813C0		+							+			-0.116592	-1.16061	-0.10389	-0.145377	-0.268335	-0.264991	-0.0331682	-0.201594	-1.64975	-0.798724	0.138058	0.327139	1.9e-07	0.999831	0.999319	0.999822	0.999689	0.941744	0.846329	1.05e-06	0.00722422	0.885649	-0.0603714	-0.518383	-0.143086	-1.17949	-2.29578	-1.09098	0.222921	-0.0272188	0.367126	0.128129	0.167192	-0.00759983	0.219361	-0.26647	0.0172825	-0.00250435
Q816T6		+							+	+	+	0.472839	-1.71625	-0.537703	-0.542375	-0.680039	-0.26311	-1.54519	-1.67227	-1.89316	-3.28866	-3.8965	0.941982	0.00379936	0.999831	0.999319	0.999822	0.999689	0.244592	0.117679	0.0199055	0.000152415	7.14e-06	-0.774242	-1.27901	-1.1826	-2.51824	-4.20568	-3.79155	-0.974331	-1.63222	-1.11292	-1.65849	-1.80392	-1.8336	-1.14024	-2.44768	-1.91519	-1.16573
Q81I09		+									+	-0.191267	-4.54745	-0.328661	-0.331573	-0.209873	-0.262185	-0.413923	-0.615317	-0.412095	-0.695179	-1.11446	0.171939	2.5e-17	0.999831	0.999319	0.999822	0.999689	0.262473	0.075371	0.14956	0.0112353	4.91e-06	0.889454	0.875631	0.980006	-3.73013	-3.91202	-3.39367	1.17967	1.57217	1.50195	0.869105	1.21451	1.22075	0.726403	1.02851	1.34763	1.30662
Q81GC6									+	+	+	-0.0656052	-0.939784	-0.381992	0.0189927	-0.0455373	-0.261782	-0.495787	-0.54077	-2.56414	-3.71056	-2.80011	0.64541	0.000346037	0.999831	0.999319	0.999822	0.999689	0.484431	0.446503	4.68e-07	4.64e-10	1.85e-08	4.96626	5.58418	5.4808	4.85176	3.76874	4.07586	6.04796	5.63552	5.47947	5.18812	5.14561	5.7198	5.86171	5.84561	5.35609	5.71835
Q814I1		+						+	+	+	+	0.158571	-1.40515	-0.0946465	0.127208	-0.541661	-0.261583	1.38301	1.25546	5.20348	4.54244	3.32814	0.90724	0.000131031	0.999831	0.999319	0.999822	0.999689	0.0612041	0.0260379	2.76e-11	1.71e-10	1.83e-07	-1.50993	-2.14851	-2.12142	-4.06553	-2.7091	-4.40874	-1.77791	-1.72854	-1.81422	-1.83627	-1.87111	-1.86068	-1.45182	-1.82018	-1.82357	-1.5815
Q81BF4		+							+	+	+	0.315422	-1.37624	-0.182436	-0.226917	-0.324839	-0.259794	-0.488329	-0.954356	-1.36292	-1.75614	-2.15261	0.997984	4.08e-08	0.999831	0.999319	0.999822	0.999689	0.25465	0.00749912	2.82e-05	5.15e-07	1.69e-09	2.36498	1.79099	1.70956	-0.567799	0.552266	0.0937252	1.93413	2.09381	1.82623	1.66146	1.92593	1.75603	1.73547	1.31665	1.96477	1.84764
Q81HI7		+						+	+	+	+	0.108469	-1.07059	0.0270761	-0.166814	-0.352905	-0.25836	-0.598675	-1.18421	-2.48222	-3.32009	-3.07605	0.805506	4.23e-05	0.999831	0.999319	0.999822	0.999689	0.308422	0.0114132	1.75e-07	6.64e-10	6.21e-10	3.0704	2.71681	2.91066	1.17337	2.03964	1.23533	3.15011	3.12038	3.03687	2.81714	3.41997	3.18805	2.6099	2.95601	3.08448	2.74744
Q819A1		+										0.405263	-2.28003	-0.159579	-0.192574	-0.137346	-0.257835	-0.465673	-0.783787	-0.892385	-0.873099	-0.555574	0.82317	9.59e-15	0.999831	0.999319	0.999822	0.999689	0.0538589	0.00159614	5.97e-05	8.22e-05	0.000221996	3.43826	3.27353	3.42899	0.633066	0.496648	0.242817	3.12243	3.23427	3.50317	3.06462	3.22462	3.12846	2.8865	3.02898	3.21015	3.0346
Q81IC3		+										0.162115	-2.00581	-0.0682297	-0.089311	-0.129743	-0.255507	-0.255831	-0.382292	-0.513129	-0.102778	0.446132	0.708543	3.58e-13	0.999831	0.999319	0.999822	0.999689	0.397184	0.262655	0.023986	0.90613	0.173481	-1.43432	-1.66601	-1.8777	-3.85407	-3.99921	-4.34087	-1.52294	-1.73	-1.27653	-1.49251	-1.62708	-1.57801	-1.54213	-1.62785	-1.78395	-1.72441
Q81AY0		+						+	+	+	+	0.528067	-3.16772	-0.199339	-0.522364	-0.742086	-0.254295	-1.91527	-4.12458	-3.46012	-5.3682	-5.16697	0.948439	0.00094463	0.999831	0.999319	0.999822	0.999689	0.3122	0.00257347	0.00274561	1.93e-05	1.74e-05	2.16906	0.872919	1.15502	-2.72742	-4.00205	-0.87323	1.28758	1.13963	1.12049	0.234376	1.62183	1.13004	-0.028285	0.238165	1.6142	-0.183857
Q817R2		+							+	+		0.644299	-3.46936	0.0677662	-0.117094	-0.573678	-0.251857	-0.458921	-0.313164	1.22524	1.97127	0.933639	0.794971	5.67e-08	0.999831	0.999319	0.999822	0.999689	0.711793	0.873721	0.0257303	0.000760954	0.188296	1.08246	0.292217	0.27254	-2.02855	-4.06412	-5.31344	0.471319	0.195622	-0.017725	0.160077	0.374951	0.354049	0.370475	-0.0803509	-0.148714	0.100967
Q81FH4									+	+	+	0.462251	-0.424345	-0.279665	-0.0181529	-0.138152	-0.251378	-0.357393	-0.790167	-1.1742	-1.69551	-2.04071	0.807551	0.000595415	0.999831	0.999319	0.999822	0.999689	0.430403	0.0329039	0.000197953	9.94e-07	4.51e-09	2.37918	3.31707	3.28593	1.60853	1.98266	2.01884	2.84102	2.9202	2.7691	2.42973	2.80817	2.48999	2.69408	2.9119	2.71335	2.63052
Q81I35									+	+	+	0.296245	0.774934	-0.164449	-0.0305901	-0.111874	-0.2499	-0.478666	-1.08953	-1.9053	-2.32452	-2.79139	0.997984	0.655108	0.999831	0.999319	0.999822	0.999689	0.642793	0.143027	0.000894199	9.16e-05	2.05e-06	0.186768	-0.527996	-1.0559	0.259066	-1.3907	0.458216	-0.918787	-0.223098	-0.209082	-0.937316	-0.451314	-0.419122	-0.687938	-0.41954	-0.491783	-0.720095
Q81J96		+										0.33732	-1.23723	-0.361298	-0.409584	-0.261504	-0.249813	-1.09831	-0.515601	-0.213551	0.155377	-0.201113	0.997984	0.0402305	0.999831	0.999319	0.999822	0.999689	0.535173	0.851318	0.876409	0.806897	0.688066	-0.291702	-0.896473	-1.71433	-1.23955	-3.16621	-3.93275	-1.19844	-0.756612	-1.02452	-1.43318	-1.40693	-1.1868	-1.80116	-1.33895	-1.22474	-1.32582
Q81I79		+										-0.240184	-4.47552	-0.345923	-0.175762	-0.687209	-0.24975	-0.395196	-0.174424	0.0806866	0.28632	-0.439727	0.471283	2.24e-12	0.999831	0.999319	0.999822	0.999689	0.62617	0.941545	0.744487	0.383398	0.14322	0.805952	-0.328663	-0.307481	-4.49925	-4.68781	-4.06152	0.668167	0.580251	0.576836	0.316247	0.331693	0.176106	0.357253	0.24358	0.540611	0.497072
Q818A3									+	+		0.0862713	-0.196011	-0.11238	-0.295822	-0.117084	-0.247348	0.0952447	0.6754	1.50277	1.01952	0.619091	0.412065	2.43e-05	0.999831	0.999319	0.999822	0.999689	0.971684	0.000234092	2.06e-10	8.06e-08	0.00668655	1.9494	2.08452	2.06188	1.77804	1.38971	1.36885	2.11061	2.27483	2.38645	2.02259	2.13919	2.30953	1.71465	2.01485	1.9984	1.98626
Q818R6									+	+		0.31614	0.901693	0.942992	-0.142861	0.251124	-0.246962	-0.295687	0.512595	1.70551	1.7527	0.569285	0.997984	0.427867	0.999831	0.999319	0.999822	0.999689	0.792794	0.425591	0.000385472	0.000244781	0.407406	-4.15197	-3.90798	-4.01696	-3.80415	-3.5837	-3.64475	-4.01763	-3.8907	-4.18211	-3.29303	-2.91375	-3.01812	-3.99997	-3.85264	-4.82293	-4.00887
Q81IM4		+									+	0.0367877	-1.92675	-0.0213858	-0.0846278	-0.270503	-0.245843	-0.365451	-0.274533	0.711603	0.967896	1.17753	0.311507	1.54e-14	0.999831	0.999319	0.999822	0.999689	0.0932431	0.409169	3.06e-05	3.13e-07	7.06e-07	1.77804	1.88004	1.77122	-0.361795	-0.550483	-0.261375	2.15166	2.07928	2.02289	1.91739	2.10167	2.20718	1.99104	1.90815	1.94424	1.91797
Q819K0		+										0.491081	-2.83485	-0.0509135	0.190057	-0.170957	-0.245296	-0.474045	-0.141787	0.331945	0.0625636	-0.849796	0.776474	3.31e-12	0.999831	0.999319	0.999822	0.999689	0.308422	0.941172	0.17022	0.629538	0.000847985	0.0629025	0.365908	-0.180707	-4.10168	-3.20326	-3.1371	-0.171535	0.268424	-0.387135	-0.253854	-0.0558691	-0.0967016	-0.0697203	0.149958	0.0431633	-0.431625
Q812R6												0.479837	0.0584494	-0.101606	-0.252497	-0.360714	-0.245102	-0.0487073	-0.322844	0.130243	0.0416368	0.555393	0.660054	0.00961054	0.999831	0.999319	0.999822	0.999689	0.883369	0.372777	0.304948	0.531735	0.049802	0.450241	0.116625	0.0304232	-0.20549	-0.315434	-0.858305	0.0950775	0.0174932	-0.0198975	0.0564051	-0.00674343	-0.225244	-0.271209	-0.420034	-0.1301	-0.140726
Q81I01		+							+	+	+	0.699776	-1.52238	-0.0252171	-0.0465088	-0.333131	-0.245083	0.315442	0.291462	1.31369	1.62021	1.4883	0.381646	5.18e-09	0.999831	0.999319	0.999822	0.999689	0.669824	0.363938	6.99e-06	2.17e-07	1.25e-05	-0.0985985	-0.387535	-0.39041	-2.61226	-2.64251	-3.00058	-0.521343	-0.888215	-0.63142	-0.70704	-0.598125	-0.774903	-0.911757	-0.613539	-0.811733	-0.7034
Q818F1		+										0.416506	-2.07515	-0.191888	-0.187627	-0.226258	-0.243022	-0.3194	-0.518105	-0.159423	-0.22763	-0.155224	0.862992	3.07e-11	0.999831	0.999319	0.999822	0.999689	0.448134	0.193264	0.730999	0.554448	0.184034	2.05307	2.34114	2.37084	0.36529	-0.872216	-0.91534	2.013	2.10483	2.33259	1.85945	2.11156	1.94032	1.77613	2.00651	1.94839	1.73706
Q814T6		+								+	+	0.260957	-1.15255	-0.307633	-0.485588	-0.237803	-0.242825	-0.416229	-0.406678	0.914913	1.04925	1.40237	0.979294	0.000191701	0.999831	0.999319	0.999822	0.999689	0.617054	0.685405	0.0225858	0.00940911	0.00535738	-0.68985	-2.16445	-2.43925	-2.66986	-4.04466	-3.5319	-1.38467	-2.13975	-1.61711	-1.61166	-1.84613	-2.57007	-1.58375	-2.65236	-2.51871	-1.95643
Q81F08		+										-0.307957	-2.25392	-0.190599	-0.395375	-0.274201	-0.242026	-0.0147915	-0.313278	-0.606242	0.140506	0.933732	0.146575	5.92e-11	0.999831	0.999319	0.999822	0.999689	0.971427	0.628596	0.052615	0.429045	0.00817679	-2.15335	-1.15738	-1.29519	-4.1534	-3.03698	-3.96578	-0.990101	-0.931716	-0.825338	-1.20475	-0.988774	-1.08886	-1.02096	-1.68884	-1.38001	-1.01712
Q81EP4									+	+	+	0.52272	0.337491	-0.052489	-0.15521	-0.255639	-0.241645	-0.476696	-0.864759	-1.05656	-1.31002	-1.1562	0.620241	0.287148	0.999831	0.999319	0.999822	0.999689	0.0932431	0.00191713	2.99e-05	1.04e-06	3e-07	2.65812	2.86333	3.0547	2.35445	2.37346	2.5802	2.49921	2.73546	2.70823	2.52747	2.66466	2.62986	2.15613	2.48009	2.68452	2.42398
Q81GN2		+										0.330171	-2.69561	-0.21133	-0.00320625	0.217237	-0.239332	-0.717833	-0.344186	-0.105883	-0.149548	-0.219788	0.996339	1.4e-07	0.999831	0.999319	0.999822	0.999689	0.40092	0.821858	0.942675	0.892009	0.423614	1.37512	0.766426	1.05097	-3.01569	-0.662238	-2.91927	1.09723	0.840404	1.19927	0.81458	0.736987	0.987905	0.77823	0.96575	1.22678	0.942837
Q819Y4												0.272326	-0.623241	-0.151248	-0.173883	-0.108135	-0.238938	-0.138629	-0.0752455	0.759089	0.308095	0.0931149	0.955932	8.18e-06	0.999831	0.999319	0.999822	0.999689	0.746278	0.991318	0.000759396	0.089825	0.723243	1.93785	1.33217	1.26545	0.587606	-0.0849428	0.633751	1.44414	1.48646	1.72279	1.40024	1.461	1.37497	1.48283	1.10775	1.38464	1.45651
Q816V1		+							+	+	+	0.436247	-1.18304	-0.0914733	-0.227985	-0.196236	-0.238916	-0.475578	-0.93798	-1.03007	-1.389	-1.87721	0.695607	6.38e-12	0.999831	0.999319	0.999822	0.999689	0.0122389	1.56e-05	5.71e-07	2.04e-09	2.97e-13	1.72668	1.81737	1.9395	0.0346603	-0.22018	0.0988388	1.62366	1.58463	1.90142	1.54624	1.67237	1.65324	1.2544	1.35805	1.65677	1.52792
Q81HW3									+	+	+	0.267496	1.07395	-0.149626	-0.229075	-0.180819	-0.238773	-0.468847	-0.68758	1.29791	3.48661	3.62078	0.979294	0.135611	0.999831	0.999319	0.999822	0.999689	0.47441	0.22789	0.000524568	1.73e-10	3.37e-10	1.06745	0.530516	0.518773	2.06967	1.87125	-0.117186	0.641891	0.604306	1.00294	0.71944	0.546388	0.571	0.346793	0.411032	0.647568	0.652344
Q81GL3												0.300871	-0.317022	-0.102058	-0.0312074	-0.0339959	-0.236763	-0.129134	-0.112434	0.477629	0.565399	0.869304	0.992932	2.62e-06	0.999831	0.999319	0.999822	0.999689	0.59157	0.923409	0.0010506	0.000168307	7.77e-05	3.30822	3.19943	2.94267	1.97656	2.33457	2.57315	3.20462	3.01952	3.25846	3.16087	3.0033	3.04882	3.19032	3.03589	3.00625	3.18071
Q812Z3		+									+	-0.791117	-1.23569	-0.351071	0.31098	0.125175	-0.236647	-0.0302696	0.271896	0.639753	0.423719	-1.40295	0.252609	0.00361549	0.999831	0.999319	0.999822	0.999689	0.984135	0.832845	0.244929	0.404619	0.0105807	-3.8766	-2.88845	-2.7456	-4.69351	-3.1742	-3.68902	-3.05395	-1.75043	-1.39802	-1.65582	-3.54152	-2.02171	-1.72657	-1.96989	-1.72952	-1.66172
Q81FJ1	+	+							+	+	+	-1.39748	-4.22246	-0.161439	-0.291825	-0.153462	-0.235059	-0.206816	-0.359188	-2.7419	-3.66214	-4.68096	0.017871	7.98e-11	0.999831	0.999319	0.999822	0.999689	0.886919	0.79746	3.73e-06	2.38e-08	8.55e-11	-0.118883	-1.09574	-0.145919	-4.34005	-1.95869	-4.24908	1.43051	0.870505	1.46578	1.42268	0.864564	1.03179	1.25802	0.724754	0.75202	1.14877
Q81B04									+	+	+	0.475178	0.592607	0.0541687	-0.0728709	-0.351611	-0.234677	-0.462447	-0.978867	-1.03576	-1.29336	-1.31595	0.721185	0.841163	0.999831	0.999319	0.999822	0.999689	0.133688	0.000853816	7.61e-05	2.87e-06	1.12e-07	2.59661	2.43827	2.39005	2.25293	2.17887	2.63306	2.56867	2.26258	2.10304	2.29482	2.36773	2.4708	1.95682	2.1149	2.48743	2.05876
Q81CE7									+	+	+	-0.235357	0.22541	-0.0534623	-0.088424	-0.00286865	-0.234386	-0.29493	-0.341901	-2.25844	-3.49422	-4.17524	0.218371	0.23731	0.999831	0.999319	0.999822	0.999689	0.566682	0.583422	2.1e-08	2.9e-12	1.91e-14	0.700876	0.83267	0.957698	1.36225	0.927123	0.871813	1.54869	1.03641	1.54712	1.46936	1.2675	1.27152	1.56249	1.13401	1.01391	1.44372
Q81GF2		+							+	+	+	0.689277	-2.19798	-0.179733	-0.155847	-0.214634	-0.23428	-0.352914	-0.233438	4.04963	5.04914	4.92145	0.412995	3.46e-11	0.999831	0.999319	0.999822	0.999689	0.423892	0.790618	6.51e-14	3.84e-16	9.6e-16	0.166187	-0.0383911	0.125087	-3.53792	-2.08589	-3.49744	-0.391981	-0.286222	-0.201851	-0.638215	-0.43863	-0.305846	-0.628451	-0.380341	-0.495327	-0.618912
Q81AU5										+		-0.806281	0.210529	-0.287141	-0.111891	0.133925	-0.233547	0.530177	-0.282431	0.522033	1.02576	0.913158	0.162064	0.502187	0.999831	0.999319	0.999822	0.999689	0.711793	0.881781	0.260295	0.0349403	0.160732	0.0901546	-0.724901	-2.92451	-0.247066	-1.16597	0.191853	-0.196795	-0.435571	0.426846	-0.172412	-0.509803	-0.348166	-0.0682116	-0.0723038	-0.557203	-0.171331
Q81AE4		+							+	+	+	0.013614	-1.86658	-0.10173	-0.191488	-0.533993	-0.233474	-0.474735	-0.454715	-2.23605	-2.94894	-1.70205	0.669414	6.38e-08	0.999831	0.999319	0.999822	0.999689	0.430403	0.488993	6.12e-07	3.59e-09	4.64e-06	1.03402	1.09334	0.921746	-0.687183	-1.0104	-1.60624	1.4939	1.22237	1.22689	1.41968	1.06901	1.18584	1.49291	0.843985	0.875278	1.32213
Q819F0		+										0.398916	-2.06944	-0.0975507	-0.45238	-0.420736	-0.233391	-0.12992	-0.188314	-0.893568	-0.64126	-0.53441	0.953296	4.65e-06	0.999831	0.999319	0.999822	0.999689	0.933145	0.943714	0.0924503	0.247555	0.147962	-0.133436	-0.683928	-0.881644	-2.52553	-4.22289	-3.06802	-0.278074	-0.728557	-0.954231	-0.838704	-0.681542	-0.696706	-0.182485	-2.21058	-1.08146	-0.461905
Q81GY0												0.309298	0.209056	-0.255423	-0.24685	-0.186275	-0.233124	-0.240135	-0.667952	-0.155493	-0.0199407	0.0519187	0.997984	0.257759	0.999831	0.999319	0.999822	0.999689	0.693686	0.154359	0.789711	0.863718	0.699692	1.43785	0.988111	1.14911	0.254637	1.46611	0.841246	1.47993	0.788508	1.31364	0.998158	1.013	0.841214	0.973182	0.797794	0.914032	0.969976
Q818Z8		+									+	-0.50412	-2.76604	0.0402451	-0.559657	0.00577609	-0.233107	-0.644981	-0.871856	-1.99123	-2.0222	-2.35204	0.707537	0.00217915	0.999831	0.999319	0.999822	0.999689	0.837458	0.710995	0.068915	0.0653467	0.0186486	0.877014	-2.97191	0.53419	-5.05131	-3.1754	-0.832123	0.442804	0.327634	0.116112	0.44007	0.244126	0.359651	-0.122891	-0.442823	-0.383232	0.68294
Q81IV5												-0.399066	-0.384031	-0.018177	-0.0924021	-0.0931606	-0.2321	-0.0859884	0.439988	0.19053	-0.66209	-0.137581	0.0544705	0.000405322	0.999831	0.999319	0.999822	0.999689	0.88073	0.130219	0.307676	0.0205634	0.205016	-0.902273	-1.37434	-1.39658	-0.974424	-1.17934	-2.18668	-0.323931	-0.716985	-0.500185	-0.539796	-0.517653	-0.50162	-0.442664	-0.750755	-0.781412	-0.501642
Q819J6											+	0.205561	1.13524	0.17061	-0.112336	-0.146082	-0.229154	0.300352	0.132813	0.1703	0.627481	1.07278	0.939319	0.153162	0.999831	0.999319	0.999822	0.999689	0.88073	0.866626	0.59847	0.0944266	0.0375023	-1.86016	-1.29652	-1.00254	-0.750797	-1.02773	-0.304005	-1.7783	-1.32179	-0.740923	-0.589898	-1.50029	-1.20244	-1.87759	-1.27465	-1.1823	-1.1503
Q815G1												0.316019	0.259682	0.159155	0.349902	0.26766	-0.22869	0.0301018	0.157565	0.282191	-0.128479	-0.494036	0.997984	0.411427	0.999831	0.999319	0.999822	0.999689	0.985985	0.801157	0.344507	0.897224	0.0666058	-0.839405	-1.42927	-1.04722	-1.08675	-1.90648	-1.20403	-1.39966	-0.89	-1.0394	-1.11888	-0.94374	-0.752408	-1.16046	-0.619558	-0.655855	-0.990969
Q81DZ4		+										0.491289	-2.17597	-0.0393003	-0.117161	-0.245792	-0.22842	-0.160271	-0.634998	-0.790042	-0.433167	-0.0367673	0.706662	2.82e-12	0.999831	0.999319	0.999822	0.999689	0.699498	0.0516691	0.00278274	0.120766	0.357544	-0.0820923	-0.595175	-0.934264	-3.09078	-3.60011	-3.63476	-0.654594	-0.837569	-0.658339	-0.869552	-0.633512	-0.728778	-0.977015	-0.680408	-1.00109	-1.29537
Q81E30										+	+	0.410625	0.127593	-0.15454	0.0209446	-0.211046	-0.228293	-0.13446	-0.450322	-0.64899	-1.22092	-1.12839	0.810298	0.0175961	0.999831	0.999319	0.999822	0.999689	0.630647	0.103019	0.00206339	3.75e-07	4.08e-08	2.42076	2.32444	2.3153	2.10519	1.30206	2.09178	2.10265	2.27001	2.39085	2.00524	2.19235	2.13886	2.25122	2.14968	2.26892	1.93344
Q81ID0		+						+	+	+	+	0.509547	-3.05544	-0.10711	-0.0399844	-0.360003	-0.226837	-0.467475	-1.07049	-1.20823	-1.57894	-1.86083	0.779304	7.76e-12	0.999831	0.999319	0.999822	0.999689	0.378901	0.0117356	0.000893351	3.63e-05	4.22e-07	3.13478	2.1651	2.306	-2.10982	-1.2829	-0.408707	2.24642	2.1163	2.64942	2.21956	2.29758	2.21023	2.01199	2.31041	2.41325	1.69328
Q817G8									+	+	+	0.306497	0.621216	-0.120965	0.00028483	0.0172901	-0.225683	-0.225109	-0.366763	-1.53724	-1.60466	2.38706	0.997984	0.699864	0.999831	0.999319	0.999822	0.999689	0.466855	0.286315	2.61e-08	8.36e-09	7.19e-12	1.05098	1.06527	0.865962	1.04606	0.887683	1.28028	1.11926	0.711001	1.16735	1.02205	0.824508	0.824727	1.10529	0.771286	0.96537	1.02443
Q81IK7		+							+	+		-0.435514	-1.71401	-0.21451	-0.0635351	-0.202905	-0.220044	-0.373992	-0.51412	-2.254	-1.62181	-0.0913239	0.434599	0.000102627	0.999831	0.999319	0.999822	0.999689	0.776876	0.657858	0.000206187	0.00509524	0.630363	-2.24088	-2.95437	-2.77059	-4.72495	-2.56793	-5.22082	-2.11902	-1.52096	-2.08443	-2.09965	-2.11648	-2.11524	-1.92527	-1.87303	-2.27324	-1.82308
Q81CE8		+							+	+	+	0.0523116	-1.2604	-0.227723	-0.0422948	-0.183659	-0.219149	-0.145921	-0.330016	-2.51216	-2.54801	-2.89961	0.763472	5.32e-05	0.999831	0.999319	0.999822	0.999689	0.913471	0.785932	1.12e-06	7.76e-07	1.91e-08	-1.47302	-1.88806	-1.53949	-2.77188	-3.86996	-2.90923	-1.33332	-1.7846	-1.00468	-1.62965	-1.8292	-1.31037	-1.2462	-1.66753	-1.49229	-1.76414
Q81G95									+	+	+	-0.637826	1.19116	0.369467	0.333435	-0.256866	-0.219083	0.569619	-0.356041	2.22786	5.69033	7.20503	0.387724	0.295271	0.999831	0.999319	0.999822	0.999689	0.776876	0.868726	0.000771874	6.97e-10	1.53e-11	-4.93246	-3.66256	-6.67635	-2.53553	-3.08091	-4.88032	-3.86653	-3.89611	-4.66036	-3.81977	-3.68212	-3.77614	-3.88743	-3.82695	-3.86484	-4.43265
Q81IJ5									+	+	+	-0.11337	1.20064	-0.267607	-0.224376	-0.346666	-0.217892	-0.193179	-0.0907472	-2.63751	-3.7061	-3.52711	0.750115	0.277951	0.999831	0.999319	0.999822	0.999689	0.931412	0.991318	0.000186725	1.54e-06	1.15e-06	0.531723	-0.339931	-0.272244	1.1893	0.862453	1.09747	0.554674	0.371739	0.268139	-0.16298	0.385407	0.205865	0.469275	-0.40218	0.297804	0.64197
Q81AP6		+							+	+	+	0.110955	-2.09565	-0.197369	-0.662182	-0.741416	-0.217743	-0.491987	-0.9151	-2.87574	-3.4999	-3.78305	0.806239	2.14e-08	0.999831	0.999319	0.999822	0.999689	0.428862	0.0619299	1.49e-08	2.32e-10	1.28e-11	-0.403063	-1.64709	-1.30751	-3.27101	-3.66479	-3.75404	-0.835539	-1.09778	-0.822302	-1.28878	-1.25527	-0.767121	-1.12883	-1.73894	-2.03093	-1.61607
Q81FQ2		+										0.340574	-1.73241	-0.12427	-0.521124	-0.434796	-0.217159	-0.184167	-0.286458	0.18581	0.740934	-0.300397	0.99295	1.68e-05	0.999831	0.999319	0.999822	0.999689	0.9063	0.864665	0.609923	0.0795017	0.312468	-0.964025	-1.00477	-1.31676	-2.11327	-4.48884	-3.61477	-1.0865	-1.29748	-0.988403	-1.02772	-1.25806	-1.42285	-1.26165	-2.11323	-1.71739	-1.66546
Q81FL9		+										0.646268	-3.50351	-0.316516	-0.323798	-0.145316	-0.216347	-0.552009	-1.08053	-0.0640965	0.128866	0.345249	0.702633	1.54e-10	0.999831	0.999319	0.999822	0.999689	0.47441	0.0590165	0.994503	0.625369	0.710585	0.903891	1.19079	1.2313	-4.08321	-4.04551	-1.70699	0.436232	0.632636	1.25321	0.320291	0.535123	0.553679	0.502456	0.396051	0.295652	0.494768
Q81CV2		+							+	+	+	-0.606564	-2.41319	-0.338657	-0.0774008	-0.180181	-0.215921	-1.27159	-0.723885	-2.68539	-3.58243	-4.30714	0.497663	0.000153772	0.999831	0.999319	0.999822	0.999689	0.308422	0.628596	0.000756834	2.27e-05	6.36e-07	-2.00462	-0.387566	-0.986167	-0.90057	-4.14381	-4.4662	-0.464956	0.00727749	-0.166086	-0.159596	-0.537793	-0.905784	-0.233525	-0.33839	-0.440577	-0.293839
Q81A09									+	+	+	-0.154798	-0.639547	-0.0489527	-0.26086	-0.138672	-0.215262	-0.51424	-0.728401	-1.424	-1.84018	-2.58054	0.13054	1.05e-06	0.999831	0.999319	0.999822	0.999689	0.0596811	0.00783783	1.97e-07	1.49e-09	2.19e-13	2.48896	2.96571	2.88892	2.11748	1.93202	2.12747	3.21502	3.23072	3.29713	3.12891	3.25617	3.2475	2.70821	2.83406	3.2615	3.18925
Q812Y5		+							+	+	+	-0.444822	-1.09432	-0.141048	-0.0670026	-0.14782	-0.213821	-0.295451	-0.788741	-2.40436	-3.24209	-3.01662	0.112639	6.4e-06	0.999831	0.999319	0.999822	0.999689	0.616941	0.0767848	3.95e-08	1.05e-10	8.55e-11	3.06498	4.38641	3.75884	3.0488	2.44413	3.05645	4.37405	4.40639	4.69915	4.30016	4.39879	4.39406	4.14997	4.51041	4.46168	4.34103
Q81GZ6		+							+	+	+	0.628517	-1.60338	-0.293143	-0.122791	-0.354551	-0.213214	-0.665748	-1.37268	-2.41886	-2.2967	-5.17321	0.829888	0.00094733	0.999831	0.999319	0.999822	0.999689	0.595738	0.117333	0.000504783	0.000849684	2.21e-09	1.44816	0.910564	1.06226	-0.565186	-3.00446	-0.417416	0.900681	0.740857	0.828794	0.356408	0.869208	0.401849	0.463401	0.668253	0.81378	0.587603
Q81BZ9								+	+	+	+	0.509576	0.262365	-0.213028	-0.264231	-0.407255	-0.212648	-0.752718	-1.24829	-2.93149	-3.0573	-3.39679	0.83495	0.465518	0.999831	0.999319	0.999822	0.999689	0.259376	0.0189676	8.32e-08	3.06e-08	1.15e-09	-0.668221	-0.856611	-0.916121	-1.31355	-1.26485	-1.31655	-1.04506	-0.880336	-1.10939	-1.39046	-1.15372	-1.09313	-1.24937	-1.73369	-1.00095	-1.40299
Q81EF6										+		-0.0470759	-0.916271	-0.134232	0.00874965	-0.372118	-0.211322	0.0706081	-0.244658	-0.276082	1.22364	0.971062	0.635282	0.000188132	0.999831	0.999319	0.999822	0.999689	0.990857	0.855621	0.585676	0.000796374	0.0318767	-0.250664	-0.628445	-0.490615	-0.515575	-1.329	-2.84509	-0.179811	-0.168021	0.0542316	-0.336278	-0.173062	-0.150395	-0.214067	-0.083086	-0.126724	-0.356035
Q818R3											+	0.420718	0.196958	-0.264423	-0.215497	-0.166056	-0.211299	-0.173594	-0.0525525	0.665973	0.850454	1.13195	0.744801	0.0223391	0.999831	0.999319	0.999822	0.999689	0.461907	0.989442	4.02e-05	1.13e-06	7.96e-07	2.43595	1.96143	2.25498	1.71082	1.72359	1.83431	1.95867	2.02188	2.34454	1.84142	1.86334	1.86363	1.68112	1.96291	1.87804	1.79111
Q81GC8		+							+	+	+	0.405584	-1.68354	0.0255496	-0.127774	-0.287364	-0.210479	-0.370218	-0.263285	-1.79444	-2.74165	-2.95452	0.939319	7.72e-06	0.999831	0.999319	0.999822	0.999689	0.676534	0.868726	0.000276171	6.81e-07	4.67e-08	4.56956	4.47638	4.20709	1.03265	2.93584	2.3048	4.14772	4.34746	4.47598	4.14578	4.31546	4.62314	4.61092	3.69526	4.12514	3.87921
Q81FI8		+							+	+		0.0839507	-3.28839	-0.0470117	0.00597	-0.0225487	-0.208651	-0.152332	-0.34552	-1.60277	-1.24325	-0.692649	0.651677	8.25e-15	0.999831	0.999319	0.999946	0.999689	0.746278	0.477015	5.94e-07	2.74e-05	0.000825357	0.109062	0.207397	0.317866	-3.92328	-2.5386	-3.73316	0.451286	0.306687	0.559395	0.342929	0.433602	0.436364	0.616382	0.209074	0.353298	0.370739
Q81ED6									+			0.37677	-0.659124	0.0561523	-0.0720971	-0.18017	-0.207088	-0.0813516	-0.145627	-1.0904	-0.797825	0.157217	0.949974	0.00100768	0.999831	0.999319	0.999822	0.999689	0.933145	0.947495	0.00523542	0.0428144	0.955958	2.29697	1.65592	1.57436	0.929844	-0.0966406	0.873999	2.00494	1.41137	1.91552	1.9722	1.71207	1.85258	1.797	1.55109	1.61092	1.91252
Q81CX7								+	+	+	+	-0.209572	1.73318	-0.00957171	-0.917276	-0.0821565	-0.207047	-1.85721	-2.94324	-4.23794	-5.04958	-4.06333	0.810298	0.192465	0.999831	0.999319	0.999822	0.999689	0.25465	0.0138073	7.96e-05	6.45e-06	5.99e-05	1.76967	-1.94709	0.499572	2.36581	2.08336	0.988878	1.01386	1.14967	-0.277779	0.293849	0.9982	0.601558	-0.861163	-0.802858	0.641428	0.294748
Q814L0		+										0.724977	-3.35947	-0.0615902	-0.346841	-0.331407	-0.20683	-0.0982876	-0.0606047	0.860608	0.808224	0.0186901	0.603371	6.29e-11	0.999831	0.999319	0.999822	0.999689	0.931412	0.998719	0.0188454	0.0238665	0.697171	0.839207	0.411839	0.0439482	-4.72522	-4.27982	-2.66567	0.228996	-0.405906	0.231865	0.204642	-0.190911	-0.106984	-0.193639	-0.641951	-0.306501	0.0480003
Q814W1												0.425387	-0.0362619	-0.0581137	-0.057944	-0.118032	-0.206713	-0.148382	-0.290451	0.338852	0.163076	0.428499	0.759781	0.0011295	0.999831	0.999319	0.999822	0.999689	0.595	0.405559	0.0213459	0.160972	0.15346	2.2739	2.13466	2.20815	1.58245	1.19629	1.74067	2.168	1.7894	2.31805	2.01242	2.09307	2.03219	2.14324	1.99148	1.81037	2.03001
Q814Q2		+										0.446669	-2.77135	-0.267644	-0.314043	-0.241166	-0.2062	-0.125958	0.41206	0.980441	0.665335	0.174414	0.923837	2.98e-08	0.999831	0.999319	0.999822	0.999689	0.931412	0.537074	0.0232401	0.0997189	0.993436	0.401068	0.0657253	0.0158205	-3.67963	-1.54083	-4.66334	0.02985	-0.247928	0.295578	-0.0336485	-0.0673609	-0.587861	-0.257281	-0.372034	-0.391838	-0.267771
Q818M1		+							+	+	+	-0.356698	-2.2273	0.263901	0.125168	-0.112085	-0.205985	-1.06434	-1.28196	-2.70368	-4.69261	-3.66986	0.635282	0.000157877	0.999831	0.999319	0.999822	0.999689	0.373231	0.199158	0.000372377	1.36e-07	2.59e-06	-1.58215	-0.799364	-0.815221	-3.01148	-4.25523	-2.25419	-0.199015	-0.114594	-0.878139	-0.46421	0.0393877	0.0613394	-0.930894	-0.107805	0.0659313	-0.457083
Q819I9												-0.172653	-0.547089	0.178866	0.112043	0.0938657	-0.204766	-1.24532	0.454332	0.493312	0.672647	0.371777	0.620241	0.0190128	0.999831	0.999319	0.999822	0.999689	0.0692999	0.503719	0.239467	0.109907	0.700661	-2.63614	-2.44205	-2.73057	-2.91087	-3.58057	-3.15298	-1.9261	-1.81475	-2.61506	-1.49093	-2.10431	-2.1875	-1.87778	-2.36909	-1.92942	-1.74872
Q81EG6		+										0.221885	-1.42995	0.0178852	0.00177829	-0.117355	-0.204144	-0.0841414	-0.275723	-0.719397	-0.732716	-0.762537	0.939319	1.71e-05	0.999831	0.999319	0.999822	0.999689	0.941744	0.848356	0.108796	0.105364	0.0228895	0.828245	0.0353184	0.308242	-0.579929	-3.08618	-0.829933	0.549641	0.514134	0.37727	0.532683	0.464021	0.534558	0.370576	0.410477	0.508802	0.442629
Q818H0		+										0.257691	-3.35659	-0.0588207	-0.21881	-0.00834783	-0.20405	-0.186014	-0.335032	0.293973	0.104439	-0.963133	0.963693	6.39e-12	0.999831	0.999319	0.999822	0.999689	0.820117	0.700923	0.301366	0.600435	0.00167366	-0.0993729	-0.719082	-0.867124	-3.93736	-5.43253	-3.87087	-0.529102	-0.679143	-0.315512	-0.533507	-0.479129	-0.651021	-0.630334	-0.90098	-0.805399	-0.482241
Q814I6		+								+	+	-0.0458927	-2.07913	-0.137782	-0.0144393	-0.0923513	-0.203236	-0.172437	-0.548719	-1.37594	-1.79076	-2.30606	0.84794	0.00125203	0.999831	0.999319	0.999822	0.999689	0.958943	0.79746	0.0968695	0.0309651	0.00257322	1.09718	0.898039	0.757993	0.232422	-4.5938	0.302528	1.50685	0.973258	1.34567	1.29674	1.0764	1.07586	1.59271	1.12749	0.905741	1.55784
Q81FP8									+	+	+	0.00237147	0.107793	-0.00849978	0.103725	-0.501734	-0.202983	-0.458611	0.068428	-1.98019	-2.27126	-2.46191	0.702633	0.239836	0.999831	0.999319	0.999822	0.999689	0.520332	0.913385	2.14e-05	2.44e-06	1.36e-07	0.472462	1.37438	1.53024	1.56858	0.264195	1.14821	1.43783	1.75055	1.11648	1.43292	1.3085	1.5745	1.37361	1.44167	1.64424	1.41162
Q815K7												0.105797	-0.138771	-0.150174	-0.213907	-0.122207	-0.201334	-0.177057	-0.242683	0.618132	0.767537	0.995032	0.706662	0.00916516	0.999831	0.999319	0.999822	0.999689	0.725606	0.772809	0.0115016	0.00219982	0.00309923	1.39699	1.59107	1.87783	0.688496	0.881099	1.85023	1.70157	1.88507	1.89675	1.76883	1.72905	1.57155	1.44991	1.60545	1.62979	1.52265
Q81B59		+									+	-0.518899	-1.86679	0.229844	0.0651728	-0.21252	-0.200827	-1.09801	-0.179574	-0.905242	-1.27636	-2.51898	0.631841	0.00427138	0.999831	0.999319	0.999822	0.999689	0.503093	0.968517	0.32134	0.147627	0.00211855	-2.14862	-2.14814	-2.43919	-1.89138	-5.65005	-3.95055	-0.61796	-1.57584	-2.05057	-0.862645	-1.45946	-1.19616	-0.63281	-1.60828	-1.96428	-0.867147
Q816W3												0.354447	-0.787396	-0.0510108	0.0558777	-0.0927207	-0.200758	-0.361692	0.185827	0.696224	0.959513	0.82781	0.949696	1.01e-06	0.999831	0.999319	0.999822	0.999689	0.308422	0.501347	0.00147426	4.65e-05	0.00562453	0.567108	0.506214	0.576325	-1.50269	-0.424455	-0.561098	0.518179	0.483354	0.519669	0.410943	0.518352	0.475436	0.553113	0.260427	0.718769	0.542212
Q81CR9									+	+	+	0.123116	-0.365964	-0.320334	-0.0885913	-0.171649	-0.199401	-0.335647	-0.387844	-3.59781	-4.69451	-4.25847	0.844067	0.0228481	0.999831	0.999319	0.999822	0.999689	0.688284	0.694411	2.77e-09	1.01e-11	1.95e-11	0.565851	-0.109924	-0.534289	-0.012022	-1.09966	-1.14628	0.320969	-0.34031	0.506527	-0.125323	0.141488	-0.45342	0.19361	-0.0617332	-0.0669899	0.00277519
Q814U9										+		0.541249	0.209526	-0.272482	0.0693057	0.503945	-0.198473	-0.0695003	0.321363	0.584493	1.30244	1.19235	0.895593	0.59054	0.999831	0.999319	0.999822	0.999689	0.981289	0.809428	0.321855	0.0348027	0.121136	-3.97839	-2.80641	-2.68517	-3.79747	-4.01463	-3.36539	-2.82334	-3.60249	-3.73299	-2.99206	-2.92794	-5.0197	-4.32181	-2.79549	-2.99013	-2.63301
Q81HW5		+							+	+	+	-0.431691	2.00421	0.133694	0.0155303	-0.0795816	-0.198202	-0.0777206	-0.208769	1.5727	1.73022	2.02722	0.187081	0.000206809	0.999831	0.999319	0.999822	0.999689	0.93732	0.892314	6.98e-05	1.67e-05	1.31e-05	-1.86749	-2.06658	-0.71358	0.305288	0.557296	1.0851	-0.8535	-1.02419	-0.539991	-0.715789	-0.833428	-0.430823	-0.838634	-0.766644	-0.922342	-0.631334
Q817Y4		+									+	0.0884654	-1.68477	-0.344833	-0.117146	0.0272846	-0.197369	0.0281353	-0.0142542	0.548983	0.766483	1.19581	0.734117	3.37e-08	0.999831	0.999319	0.999822	0.999689	0.985985	0.958782	0.0470357	0.00755566	0.00174205	-0.990522	-1.7832	-2.04163	-3.45539	-3.46767	-3.92434	-1.53186	-1.35437	-1.25962	-1.66704	-1.58573	-1.89102	-1.53916	-1.88981	-1.22484	-0.984339
Q81IN9		+							+	+		-0.119368	-1.08655	-0.582062	-0.675768	-0.136597	-0.196433	-0.87446	-1.12319	-2.00047	-1.54105	-0.95436	0.75327	0.0111344	0.999831	0.999319	0.999822	0.999689	0.47441	0.258489	0.00409533	0.0251556	0.0816415	-1.76311	-3.29716	-4.83381	-4.88734	-5.12169	-3.49897	-2.79996	-3.78201	-2.01911	-2.77667	-4.17579	-3.35824	-3.16588	-3.99319	-3.62584	-2.59228
Q819U5												0.652785	0.441698	-0.0758737	0.0531985	-0.241398	-0.196091	-1.05608	-0.737406	-0.936956	-0.950487	-0.057471	0.686303	0.786948	0.999831	0.999319	0.999822	0.999689	0.0721926	0.251444	0.0341554	0.0332345	0.57569	-1.08773	-1.2897	-1.39383	-1.94136	-1.75568	-1.41984	-1.41685	-1.86028	-1.51759	-1.56132	-1.58103	-1.84343	-1.40621	-1.70556	-1.67988	-1.78442
Q81D46									+	+	+	-0.525949	0.963025	-0.488814	-0.179929	-0.178771	-0.195758	-0.299989	-0.972153	-3.3081	-3.46802	-3.86846	0.437697	0.479205	0.999831	0.999319	0.999822	0.999689	0.872215	0.312398	6.36e-06	2.54e-06	1.65e-07	-2.66817	-1.40517	-0.832282	-0.241493	-0.851403	-0.0581665	-0.925968	-0.806039	-0.660879	-0.790023	-1.23346	-1.79928	-1.02314	-1.12196	-0.944096	-1.01299
Q816G8		+										0.195227	-1.30022	-0.144261	-0.201466	-0.44959	-0.195388	0.1288	-0.800367	-0.225344	0.489045	0.116313	0.939319	0.000405322	0.999831	0.999319	0.999822	0.999689	0.984135	0.319098	0.764366	0.247555	0.908141	-0.444099	-0.548662	-0.550317	-0.26049	-3.5398	-2.94147	-0.218901	-0.597642	-0.377321	-0.286284	-0.70827	-0.595531	-0.455207	-0.643795	-0.855785	-0.52951
Q81AH1									+	+		0.135613	0.557941	0.205813	0.320393	0.194554	-0.195062	-0.110265	-0.140849	1.50976	1.89333	0.132658	0.869425	0.984153	0.999831	0.999319	0.999822	0.999689	0.933145	0.958782	0.000746767	5.41e-05	0.922585	-3.48956	-3.20159	-4.06453	-2.52759	-4.38227	-3.29118	-3.42338	-3.23425	-3.56998	-3.04632	-3.25603	-3.27126	-2.13032	-3.71215	-3.58048	-2.95381
Q81DM9									+	+	+	0.665286	-0.709314	-0.167372	-0.00874265	-0.134762	-0.193618	-0.488025	-0.913799	-1.16439	-1.47789	-1.7884	0.311028	7.09e-07	0.999831	0.999319	0.999822	0.999689	0.0922441	0.00120273	8.92e-06	1.59e-07	3.43e-10	3.03111	2.825	2.74294	1.30852	1.08878	1.3656	2.51121	2.28965	2.73723	2.33906	2.5436	2.18988	2.31392	2.47359	2.56782	2.1345
Q81HQ9		+							+	+	+	-0.129503	-1.3443	-1.28036	0.0773862	-0.0345891	-0.193315	-0.290425	-0.314879	-3.56227	-2.71012	-2.91126	0.750764	0.00419252	0.999831	0.999319	0.999822	0.999689	0.900084	0.894183	6.99e-06	0.000218327	3.22e-05	-1.82633	-1.637	-2.10626	-3.27661	-2.95945	-3.69029	-1.41618	-1.55811	-1.27189	-4.87038	-1.48427	-1.69605	-1.50343	-1.19098	-1.47614	-1.80112
Q819P3		+									+	0.184254	-1.30418	-0.276427	-0.157448	-0.0303052	-0.192605	-0.702174	-0.761881	-0.936591	-0.914474	-1.66741	0.925472	0.000115238	0.999831	0.999319	0.999822	0.999689	0.356125	0.282792	0.0502537	0.0588616	0.000155429	0.031086	-0.262608	-0.229312	-1.20355	-2.0987	-2.33625	-0.373871	-0.0346022	0.329771	-0.453755	-0.20576	-0.211905	-0.591968	-0.0812607	-0.0343437	-0.174934
Q81CH2		+							+	+	+	0.178106	-1.97072	-0.0691636	-0.210519	-0.378414	-0.192235	-0.468725	-0.638178	-1.59392	-2.00962	-2.58512	0.949974	0.000771016	0.999831	0.999319	0.999822	0.999689	0.810331	0.689416	0.0347088	0.00850462	0.000378465	0.733385	0.422918	0.314952	-1.70584	0.309142	-4.29088	0.959028	0.712308	0.200495	0.79931	0.473252	0.42834	0.413074	-0.0534077	0.724083	0.703537
Q819C7												-0.0158195	-0.808054	-0.127005	-0.446798	-0.081302	-0.18735	-0.372362	-0.408237	-0.0776265	-0.289232	-0.767977	0.656478	0.00034611	0.999831	0.999319	0.999822	0.999689	0.589378	0.594543	0.979259	0.557652	0.0096736	-3.11255	-3.89828	-3.99537	-4.578	-4.61055	-4.90672	-3.1186	-3.49172	-3.41353	-3.25338	-3.41911	-3.6958	-3.34795	-4.59438	-3.57844	-3.24566
Q814H1									+			0.45822	0.143229	-0.164556	-0.192841	-0.191621	-0.186878	-0.0405025	-0.23553	1.15366	0.968472	0.75786	0.696416	0.0235533	0.999831	0.999319	0.999822	0.999689	0.897244	0.611902	2.01e-07	1.85e-06	0.00240868	2.85	2.45261	2.28635	2.38058	1.65653	1.89452	2.32928	2.25984	2.56008	2.13012	2.24421	2.31775	2.04345	2.18421	2.18649	2.16826
Q81JB9		+									+	0.667944	-1.6148	-0.108111	-0.518954	-0.741692	-0.186083	-0.0787563	-0.0834281	0.824555	0.81508	1.37851	0.746024	0.000110533	0.999831	0.999319	0.999822	0.999689	0.97094	0.993216	0.083763	0.0815896	0.0219889	-0.979778	-1.66421	-1.36712	-4.13227	-3.02972	-4.40971	-1.74416	-2.13322	-1.20267	-2.09347	-1.73504	-1.5393	-1.77673	-3.26533	-1.75136	-1.84899
Q815K8												0.165387	-0.455627	-0.0763925	-0.153505	-0.177898	-0.185012	-0.467869	-0.538469	0.0261097	0.0202948	0.501015	0.729736	1.03e-05	0.999831	0.999319	0.999822	0.999689	0.0893627	0.0634397	0.660013	0.625006	0.108333	6.20901	6.45233	6.55446	5.56573	5.70351	5.37116	6.50134	6.61827	6.53492	6.3739	6.56649	6.52152	6.05297	6.43498	6.54954	6.30877
Q81DS3										+	+	0.131965	-0.0245228	0.0328827	-0.111279	-0.204627	-0.181915	-0.0784308	0.122318	0.964117	1.14097	1.07377	0.604778	0.00110619	0.999831	0.999319	0.999822	0.999689	0.776876	0.502531	1.01e-06	4.86e-08	7.27e-06	-0.0372772	0.142382	0.378003	-0.168758	-0.0317011	-0.498253	0.312244	0.373498	0.336365	0.443683	0.360856	0.352778	0.241784	-0.0650768	0.35504	0.174305
Q819Z7		+								+	+	0.447758	-2.80972	-0.0488269	-0.0121892	-0.0656745	-0.180979	0.0867755	0.203009	0.828417	1.41689	1.18511	0.763472	8.04e-15	0.999831	0.999319	0.999822	0.999689	0.984287	0.42586	0.000154837	7.6e-08	3.37e-05	2.85943	2.54637	2.27609	-1.07133	-1.29287	-0.438692	2.43035	2.22629	2.61687	2.45362	2.35019	2.35978	2.60601	2.17023	2.30418	2.60141
Q819Y0												-0.0108522	-0.199859	-0.235945	-0.0554371	-0.160583	-0.177444	-0.121985	0.0820236	0.713445	0.532872	0.0769011	0.669414	0.040045	0.999831	0.999319	0.999822	0.999689	0.918462	0.893793	0.0381243	0.0994843	0.797195	2.1373	2.1684	1.27682	0.306988	1.90378	2.09237	2.15923	2.23581	2.15492	1.83199	2.07179	1.97492	1.89302	2.10217	2.23194	2.13939
Q81AL6									+	+	+	-0.26948	-0.878414	-0.0973441	-0.0994466	-0.0505301	-0.176364	-0.487691	-0.918746	-2.57318	-3.30911	-2.95177	0.141892	2.79e-06	0.999831	0.999319	0.999822	0.999689	0.233281	0.00749912	3.55e-10	1.33e-12	2.35e-12	1.75706	2.39589	2.44529	1.65756	0.929626	1.4719	2.89954	2.4947	2.94734	2.69055	2.69364	2.70192	2.50932	2.62306	2.75433	2.5925
Q813X8		+							+	+	+	-0.0949745	-2.32601	-0.151234	-0.143766	-0.536085	-0.17587	-0.333831	-0.897699	-2.27779	-2.46018	-2.44375	0.741807	1.16e-05	0.999831	0.999319	0.999822	0.999689	0.828708	0.335781	0.000401542	0.000159109	5.24e-05	-0.0364285	-0.631393	-1.05645	-1.56842	-2.87521	-4.68612	0.0805283	-0.289195	-0.29579	-0.132537	-0.437407	-0.351651	-0.39643	-0.45224	-0.243608	-0.48844
Q814W9		+							+	+	+	-0.432222	-3.46188	-0.221397	-0.250023	-0.0408389	-0.175699	-0.0462443	-0.413837	-2.33736	-3.09073	-3.06604	0.119467	6.05e-13	0.999831	0.999319	0.999822	0.999689	0.945902	0.500545	6.38e-08	2.55e-10	6.31e-11	-0.688467	-0.29805	-0.496943	-2.92761	-4.16448	-4.1927	0.319183	-0.134833	0.563751	0.0219145	-0.0114946	0.110053	0.0965662	-0.13026	-0.124798	0.486
Q81DR0									+	+	+	-0.564081	-0.714766	0.0601304	-0.0375385	-0.352989	-0.175261	-0.700471	0.0460447	1.60568	1.9394	1.45646	0.451658	0.0440132	0.999831	0.999319	0.999822	0.999689	0.595122	0.958782	0.0113038	0.00262272	0.0495075	-1.34958	-4.60203	-3.3954	-3.9732	-3.5773	-2.96092	-1.84579	-3.29665	-1.57743	-1.90418	-2.28464	-2.3141	-1.54982	-3.25437	-2.18483	-2.63167
Q814C4		+										0.193245	-1.19401	-0.0391877	-0.0624555	0.0297909	-0.174897	-0.130227	-0.00794983	0.767442	0.46274	0.28837	0.847959	1.5e-07	0.999831	0.999319	0.999822	0.999689	0.814748	0.951663	0.00248905	0.0406065	0.69677	6.95797	7.35162	7.66637	5.61185	6.24859	5.24138	7.54132	7.27104	7.51875	7.43145	7.45038	7.36829	7.2213	7.49318	7.27275	7.39225
Q816R0		+							+	+	+	-0.744095	-1.41873	-0.0251516	-0.0631307	0.124925	-0.174574	-0.157524	-0.0289618	-1.85055	-2.31922	-2.53069	0.239868	0.00088952	0.999831	0.999319	0.999822	0.999689	0.934357	0.991318	0.00274766	0.000274126	2.86e-05	-0.470066	-1.24345	-2.83213	-1.64966	-3.43307	-2.19918	-0.360126	-0.766572	-0.251768	-0.562966	-0.345723	-0.50867	-0.358144	-0.751541	-0.614698	0.0163574
Q812M4		+							+	+		-0.241476	-2.19513	-0.0955257	0.0793374	-0.199024	-0.173897	-0.501575	-0.0659663	-1.16808	-1.07585	-0.331456	0.379378	1.68e-08	0.999831	0.999319	0.999822	0.999689	0.430403	0.998719	0.00372045	0.00753312	0.162929	-2.01799	-1.44536	-1.75454	-4.11242	-3.75826	-3.92055	-1.31169	-1.15528	-1.0916	-1.16904	-1.24743	-1.39212	-0.630517	-1.5647	-1.28187	-1.08502
Q81CQ3		+							+	+		-1.16348	-1.07242	0.0803013	-0.216906	-0.263857	-0.173098	-0.42996	-0.674023	-2.20114	-3.32317	-0.874338	0.0544705	0.00221161	0.999831	0.999319	0.999822	0.999689	0.699498	0.464037	0.000188223	4.89e-07	0.0440939	-3.28006	-2.08404	-4.73676	-3.38619	-3.20804	-3.94578	-1.7603	-2.06309	-1.85213	-2.00218	-1.72115	-1.67472	-1.79933	-2.45448	-2.22894	-1.85265
Q81J94												0.551327	0.270587	-0.138657	0.029864	-0.147617	-0.172326	-0.247917	-0.403474	0.152725	0.252986	0.409248	0.412995	0.0866346	0.999831	0.999319	0.999822	0.999689	0.312249	0.131392	0.194334	0.0492684	0.172932	0.793421	0.668003	0.475663	0.45236	-0.0141211	-0.0557289	0.435099	0.447492	0.335411	0.214309	0.362153	0.262132	0.376941	0.40955	0.364578	0.403452
Q819D5												0.515246	0.300109	-0.1226	-0.0438137	-0.14523	-0.172125	-0.187377	0.0176194	0.995367	0.879498	0.939961	0.648272	0.226959	0.999831	0.999319	0.999822	0.999689	0.600912	0.894183	1.85e-05	5.94e-05	0.000822007	2.49262	2.77736	2.7321	1.96287	2.59228	2.08917	2.37562	2.43661	2.57901	2.35276	2.43494	2.27231	2.17057	2.4804	2.45231	2.18652
Q81H11		+										0.426614	-1.56898	0.00409571	-0.130177	-0.225944	-0.171148	-0.254269	-0.402449	-0.999247	-0.847821	0.0932484	0.966956	0.00695018	0.999831	0.999319	0.999822	0.999689	0.931412	0.873721	0.236139	0.320765	0.921789	1.42332	1.69374	0.982871	0.825941	-4.17804	0.752888	1.53549	1.17556	1.04394	1.32894	1.22613	1.24875	1.3471	0.768038	1.09279	1.21319
Q818R9		+										0.718221	-2.52039	0.0277894	-0.162018	-0.344347	-0.170167	-0.866196	-0.448914	0.550501	0.375307	0.244785	0.666676	1.73e-07	0.999831	0.999319	0.999822	0.999689	0.261317	0.672657	0.18855	0.326868	0.899011	1.71354	1.31152	1.34649	-0.864464	-3.57185	-1.62034	1.28552	0.921561	0.944695	1.05804	1.05491	1.15875	0.927941	0.556707	1.02455	1.17274
Q81J80												0.775376	0.27857	-0.0306753	-0.0351098	-0.115836	-0.169927	-0.260215	-0.545367	0.12523	-0.0206839	0.1531	0.102837	0.136436	0.999831	0.999319	0.999822	0.999689	0.364115	0.0432374	0.313603	0.772002	0.899013	1.82597	1.6778	1.55882	0.470364	1.07864	1.31082	1.11354	1.27507	1.28275	1.12426	1.2376	1.25404	1.07306	1.03442	1.30204	1.11003
Q816T0												0.563606	0.378697	-0.0422281	-0.0707931	-0.264708	-0.169617	-0.11379	-0.437502	-0.121601	-0.249055	-0.0257575	0.309115	0.234294	0.999831	0.999319	0.999822	0.999689	0.595738	0.0472071	0.730231	0.245165	0.168157	3.78122	3.49886	3.46085	3.28616	3.20898	2.97871	3.41961	3.36861	3.19679	3.17485	3.38504	3.335	3.09109	3.23401	3.291	3.16369
Q81CI5									+	+	+	0.356547	1.25376	-0.204294	-0.313721	-0.00253423	-0.168784	-0.02812	-0.617718	-2.45657	-3.39979	-1.84437	0.98658	0.10666	0.999831	0.999319	0.999822	0.999689	0.981289	0.442763	8.3e-06	3.26e-08	6.6e-05	0.163975	-0.912205	-0.649583	0.213417	-0.216559	0.584604	-0.392456	-0.70688	-0.433224	-0.785598	-0.675233	-0.648049	-0.435601	-1.03468	-1.15997	-0.831104
Q81IJ6		+							+	+	+	1.12969	1.41233	-0.138473	-0.00160853	-0.26389	-0.168232	-0.690956	-0.743687	-1.67366	-2.09136	-3.14145	0.215114	0.0364125	0.999831	0.999319	0.999822	0.999689	0.324692	0.269879	0.00043547	2.65e-05	9.81e-09	4.48244	4.84513	4.81324	5.27687	4.44101	4.5585	4.37694	3.39442	3.91529	3.9798	3.86413	3.46385	4.0152	3.88764	3.62244	4.05338
Q81A01								+	+	+	+	0.598045	1.05521	-0.0547873	0.130489	-0.144512	-0.165307	-0.450779	-1.14094	-2.63726	-5.29776	-6.81152	0.718364	0.167238	0.999831	0.999319	0.999822	0.999689	0.513799	0.0236024	1.75e-07	3.05e-13	5.23e-16	2.06243	2.30968	2.25252	2.66751	2.06074	2.55552	1.59415	2.13695	2.03429	1.52622	2.17763	1.93374	1.77605	2.07754	2.14674	1.57947
Q81AG3									+	+	+	0.0211964	-0.986124	-0.264058	-0.112912	-0.217202	-0.165294	-0.356747	-0.693455	-2.63317	-3.4522	-3.88808	0.434599	2.43e-08	0.999831	0.999319	0.999822	0.999689	0.261317	0.0151326	4.46e-12	1.31e-14	1.92e-16	4.19545	4.60658	4.7486	3.18742	3.57467	3.05422	4.7945	4.80791	4.81952	4.23383	4.75229	4.68021	4.40163	4.57292	4.95212	4.59645
Q817B8		+								+	+	0.317666	-2.17046	-0.151383	-0.0993411	-0.130525	-0.165294	-0.299942	-0.506413	0.683037	1.71934	1.23841	0.997984	5.74e-13	0.999831	0.999319	0.999822	0.999689	0.364604	0.118151	0.000952731	2.61e-09	1.61e-05	3.82891	3.92337	3.93822	0.760195	1.70984	1.04375	3.68564	3.8914	4.09537	3.62575	3.81525	3.81382	3.52944	3.90984	3.77858	3.49191
Q813U4									+	+	+	0.948959	-0.228369	-0.0336463	0.074688	-0.127979	-0.164956	-0.390622	-1.10766	-2.39094	-3.4421	-4.63114	0.392262	0.0633977	0.999831	0.999319	0.999822	0.999689	0.642793	0.0587676	6.35e-06	1.1e-08	1.26e-11	1.80344	1.29733	1.20875	0.295532	-0.23532	0.00497055	0.755171	0.817882	0.824488	0.940021	0.766999	0.626143	1.06582	0.591349	0.807911	1.00851
Q81DV5									+	+		0.228353	-0.74757	0.0302486	-0.0738004	0.105429	-0.164277	0.206619	-0.108489	-2.42502	-2.31446	-0.195421	0.955932	0.00851056	0.999831	0.999319	0.999822	0.999689	0.956446	0.98447	3.08e-05	5.19e-05	0.459532	-1.10039	-0.950108	-2.13378	-3.27803	-1.65697	-2.88941	-1.42701	-1.20699	-1.30045	-1.11118	-1.37129	-1.32467	-1.15357	-1.70942	-1.44938	-1.36734
Q81IT0		+									+	0.443063	-2.65062	-0.417316	-0.145496	-0.097126	-0.163919	-0.290213	-0.543301	0.145979	-0.0642115	-1.77615	0.866943	8.72e-11	0.999831	0.999319	0.999822	0.999689	0.62617	0.321118	0.528495	0.965807	8.85e-07	-0.430941	-0.836555	-0.729352	-3.6113	-4.07432	-4.30464	-1.05922	-1.06376	-0.268164	-1.12393	-0.955407	-1.5272	-1.23772	-1.04933	-0.697113	-0.798809
Q81IA7		+							+	+	+	0.204078	-3.23231	-0.0114009	-0.196694	-0.270093	-0.162955	-0.366522	-0.783736	-2.70819	-3.37935	-4.22473	0.810616	1.66e-16	0.999831	0.999319	0.999822	0.999689	0.217207	0.0034475	1.06e-12	7.7e-15	1.15e-17	1.89458	1.5402	1.51515	-1.65536	-2.1783	-2.23793	1.86812	1.48201	1.92246	1.66576	1.96462	1.64457	1.40657	1.42549	1.69392	1.32624
Q819G0										+	+	-0.151091	-0.380307	-0.196973	-0.162496	-0.108496	-0.162147	-0.140099	-0.474087	-0.280954	2.01559	1.73698	0.0907799	9.73e-06	0.999831	0.999319	0.999822	0.999689	0.62617	0.0880652	0.24563	8.77e-12	2.57e-09	2.39306	2.4006	2.64799	2.07131	1.50688	2.46346	2.80737	2.95064	3.07182	2.56529	2.85811	2.85207	2.72771	2.77939	2.67871	2.73944
Q814V1		+							+	+	+	-0.556405	-1.94611	-0.649229	-0.926451	-0.754796	-0.162144	-0.270201	-0.0925058	1.63915	2.2513	2.15552	0.453818	0.00028343	0.999831	0.999319	0.999822	0.999689	0.906801	0.991318	0.00999013	0.000704504	0.00326562	-0.911692	-4.02404	-2.77212	-3.66278	-4.57102	-4.35552	-1.51751	-1.58777	-1.99846	-1.83958	-2.29441	-2.88087	-1.80577	-3.8559	-2.37794	-1.39143
Q819Z5		+							+	+	+	0.0716457	-2.87055	-0.0657457	-0.0995089	-0.0959174	-0.161786	-0.123476	-0.494416	-2.32224	-3.04386	-4.15673	0.839792	9.32e-08	0.999831	0.999319	0.999822	0.999689	0.939962	0.647794	6.65e-05	1.2e-06	1.76e-09	2.08935	1.61434	1.78454	-0.648342	-3.23674	-0.165636	2.14305	1.90889	2.15625	2.11406	1.93417	1.99929	2.23874	1.7569	1.7575	2.02723
Q816U5		+										-0.330346	-1.77561	-0.0615686	-0.119476	-0.525841	-0.161606	-0.176332	-0.718771	0.0118491	0.714151	0.753969	0.487892	3.2e-05	0.999831	0.999319	0.999822	0.999689	0.920629	0.403759	0.883201	0.111302	0.255417	-4.21475	-1.62753	-1.53358	-4.58323	-3.7769	-4.06386	-1.9586	-1.75273	-1.7386	-1.90143	-1.71043	-1.98621	-2.17934	-2.07767	-1.70786	-1.75629
Q81GJ3		+							+	+	+	0.0599028	-1.49276	-0.148221	-0.149881	-0.153272	-0.161404	-0.282113	-0.447623	-2.46904	-3.54149	-3.84133	0.582983	5.49e-10	0.999831	0.999319	0.999822	0.999689	0.448134	0.232979	7.03e-11	4.37e-14	1.09e-15	1.32966	0.883995	0.806958	-0.584583	-0.787421	-0.97772	1.37347	1.00274	1.39958	0.981341	1.1182	1.26816	1.09013	1.01457	1.06493	1.08459
Q815Z0		+										-0.17355	-3.79515	-0.145789	-0.293554	-0.206376	-0.160992	-0.267577	-0.00659116	-0.11654	-0.470307	-0.469069	0.390687	2.69e-13	0.999831	0.999319	0.999822	0.999689	0.672921	0.958782	0.886506	0.22809	0.0498467	1.37025	0.562452	0.231757	-2.27453	-3.65265	-3.48552	1.10509	1.15305	1.36187	1.01343	1.18134	1.02442	0.899384	0.731516	0.951916	0.950773
Q81GK5												-0.252838	-0.452181	-0.195218	-0.597068	-0.318376	-0.160653	0.242247	0.493235	0.524701	0.487017	0.298345	0.242362	0.00147415	0.999831	0.999319	0.999822	0.999689	0.868744	0.188503	0.0536057	0.0641035	0.713835	-2.85402	-3.67142	-3.15355	-4.27216	-2.83921	-3.87799	-2.81478	-2.9206	-2.25019	-2.93361	-2.98111	-2.61995	-3.17721	-3.73027	-3.02582	-2.71366
Q81E31												-1.63241	-1.13702	-0.208943	0.0789528	-0.225442	-0.160603	-0.0263488	0.467489	-0.0770785	-1.30313	-0.804799	0.165385	0.0569948	0.999831	0.999319	0.999822	0.999689	0.985985	0.816899	0.992239	0.174504	0.284878	-1.16068	-1.54096	-4.88405	-3.42366	0.300326	-3.68852	-0.537994	-0.605235	-0.610323	-0.535028	-1.23343	-0.575366	0.0118628	-0.827129	-0.857952	-0.534483
Q81HT7		+									+	-0.228057	-2.41322	0.0274817	0.0382214	0.406538	-0.160365	0.142835	-0.692674	-0.390921	-1.23403	-1.95127	0.707537	9.94e-05	0.999831	0.999319	0.999822	0.999689	0.985985	0.628596	0.660389	0.0951368	0.00339234	-2.21493	-3.09579	-2.84212	-6.56899	-3.2473	-5.60438	-2.38136	-2.50276	-1.64965	-2.61529	-1.74991	-2.04956	-2.54187	-2.42735	-1.60642	-1.69746
Q81FS5									+	+	+	0.0121142	0.526614	0.240159	-0.505265	-0.223833	-0.159932	-0.894374	-0.683186	-2.141	-4.77968	-4.62305	0.741807	0.959589	0.999831	0.999319	0.999822	0.999689	0.179197	0.331725	2.38e-05	1.5e-11	9.12e-12	0.387697	0.136362	0.0867968	0.478828	0.284451	0.678719	0.653717	0.022378	0.833313	0.772349	0.875428	0.61867	-0.564298	-0.216579	0.617966	0.107014
Q81I73		+									+	0.28485	-1.55397	-0.191018	-0.0924371	-0.301149	-0.159421	-0.197372	-0.61801	-0.496956	-0.4055	-1.20112	0.992932	4.36e-06	0.999831	0.999319	0.999822	0.999689	0.843016	0.349442	0.276225	0.401939	0.000932334	-1.07058	-1.11072	-1.40467	-4.12775	-2.00079	-3.68623	-0.950768	-1.13248	-1.42237	-1.18761	-1.34318	-1.51133	-1.27645	-1.38678	-1.27624	-1.07116
Q816N5									+	+	+	0.533456	0.872063	0.0427214	-0.116138	-0.0903301	-0.1593	0.192314	0.468838	1.38545	1.17043	1.74705	0.57392	0.0857689	0.999831	0.999319	0.999822	0.999689	0.822994	0.0289605	3.42e-08	3.18e-07	6.31e-09	1.29915	1.26691	1.08428	1.51861	1.19531	1.23989	1.36019	0.791295	0.833387	1.27166	0.963372	0.914557	1.04713	0.657917	0.774881	1.1373
Q81E49												-0.163268	-0.194363	0.14757	-0.00170898	0.0915661	-0.158879	0.135752	-0.410415	-0.863878	0.339938	0.142698	0.279667	0.00618469	0.999831	0.999319	0.999822	0.999689	0.959188	0.415012	0.00449409	0.11903	0.901891	-1.59187	-0.765623	-0.550881	-0.980646	-1.30853	-1.42484	-0.456884	-0.842265	-0.184528	0.0382013	-0.627299	-0.415309	-0.22634	-0.814499	-0.60449	-0.390795
Q815D0		+										-0.558136	-2.82175	0.45985	0.0284723	-0.2839	-0.158262	0.248818	0.859125	0.639768	0.702952	1.31129	0.609575	0.000173843	0.999831	0.999319	0.999822	0.999689	0.971684	0.500599	0.408207	0.344346	0.176324	-4.20694	0.253412	0.345351	-3.76397	-4.20806	-3.13933	-0.71718	-0.218637	-0.0630531	-0.500543	0.336978	0.580806	-1.54137	0.0324917	0.438902	-1.73523
Q81IP8		+						+	+	+	+	0.737348	3.66318	0.741806	1.77955	0.901513	-0.158016	0.732552	3.6337	7.31158	7.66008	7.1698	0.86507	0.00296735	0.999831	0.999319	0.999822	0.999689	0.838938	0.00389092	6.92e-08	2.15e-08	1.38e-07	-4.70795	-3.32857	-5.3737	-3.63263	-0.335166	-1.3773	-5.16772	-5.73421	-3.78544	-3.52437	-5.14965	-3.75138	-3.31256	-3.71105	-2.48165	-5.8643
Q81I14		+							+	+	+	0.00231806	-1.99001	-0.131474	-0.137393	0.0119247	-0.15786	-0.272611	-0.686972	-1.21504	-1.34604	-2.03909	0.750764	2.66e-06	0.999831	0.999319	0.999822	0.999689	0.813248	0.373264	0.0141208	0.00700252	2.33e-05	-0.221928	0.16082	-0.17479	-3.74786	-1.01026	-2.16713	-0.100111	0.3255	0.466654	0.0303488	0.172868	0.130967	-0.478837	0.235764	0.366413	0.190292
Q812Y0	+							+	+	+	+	-1.16306	-0.188182	-0.201758	-0.214444	0.0889905	-0.157368	-0.495753	1.28063	2.39811	3.1297	3.1189	0.0341855	0.102916	0.999831	0.999319	0.999822	0.999689	0.595	0.0215224	8.71e-06	1.1e-07	4.92e-07	-4.04972	-4.47449	-3.33684	-4.01033	-3.04524	-2.59323	-2.40611	-3.16828	-1.86261	-2.03991	-3.27526	-2.69053	-1.69746	-3.45826	-3.08113	-2.65127
Q81D05		+								+	+	0.23662	-2.78094	-0.0252698	0.0407187	0.0394287	-0.156253	0.0790679	-0.23806	0.353861	1.17546	2.01368	0.880582	1.64e-15	0.999831	0.999319	0.999822	0.999689	0.985985	0.628596	0.0329923	3.27e-07	3.68e-10	-1.30372	-0.825226	-1.06534	-3.91968	-4.6373	-4.40234	-0.986149	-1.10496	-0.878139	-0.999427	-1.08963	-0.919438	-0.949733	-1.17803	-0.87586	-1.04853
Q81J82												0.337925	-0.530876	-0.11279	0.00181516	-0.220345	-0.155883	-0.171892	-0.271191	-0.114242	-0.296473	-0.377818	0.949696	4.96e-09	0.999831	0.999319	0.999822	0.999689	0.357521	0.298547	0.74156	0.100749	0.000164025	3.95551	3.72448	3.59226	2.69697	2.56259	2.69393	3.70082	3.79924	3.69331	3.50692	3.78252	3.60211	3.69048	3.74173	3.61008	3.54669
Q819E8									+	+	+	-0.00386556	-0.68298	-0.0396322	0.0449937	0.0308069	-0.15545	0.0292556	-0.185724	-1.25314	-1.51967	-1.20729	0.325164	2.42e-07	0.999831	0.999319	0.999822	0.999689	0.984135	0.792294	7.26e-07	2.06e-08	4.38e-08	1.56958	1.25862	1.14863	0.27318	0.447593	0.506359	1.76295	1.46136	1.69901	1.69127	1.45554	1.69418	1.89383	1.45434	1.55361	1.88628
Q81IH2											+	0.295277	-0.296346	-0.187962	-0.171624	-0.258308	-0.154465	-0.373515	-0.577047	-0.581478	-0.746281	-1.22754	0.987413	1.67e-05	0.999831	0.999319	0.999822	0.999689	0.112922	0.0178648	0.00433111	0.000354727	5.87e-09	-0.250048	0.36701	0.192311	-0.752354	-0.929275	-0.496323	0.179422	0.0232992	0.155617	-0.122041	0.140481	-0.187427	-0.0289526	-0.23674	-0.0473652	-0.181168
Q81GC5												0.625189	-0.247236	-0.00996272	0.157857	0.0168673	-0.154464	-0.387898	-0.0503343	0.471088	0.692449	0.951818	0.561609	0.00353996	0.999831	0.999319	0.999822	0.999689	0.370766	0.991318	0.0467504	0.00538459	0.00548255	-1.00331	-1.39648	-1.43034	-2.68957	-1.90809	-2.56211	-1.69778	-1.67009	-1.40294	-1.78835	-1.44276	-1.53302	-1.78469	-1.63796	-1.0311	-1.58344
Q815Q1									+	+		0.452892	-0.01581	-0.0256125	0.0167745	-0.154467	-0.153352	-0.0100899	-0.467686	-1.45402	-1.16141	-0.387292	0.829888	0.0388745	0.999831	0.999319	0.999822	0.999689	0.971684	0.337553	1.96e-05	0.000335954	0.0451687	1.20795	0.722761	0.726659	0.645636	-0.684283	0.577557	0.802183	0.506618	0.924789	0.819455	0.541816	0.832044	0.848027	0.539284	0.740078	0.93117
Q81J59												-0.0270017	0.413918	0.0137259	0.0668023	-0.041448	-0.153255	-0.0470263	-0.260429	-0.274297	-0.226367	0.10844	0.133774	0.344793	0.999831	0.999319	0.999822	0.999689	0.820117	0.391856	0.162195	0.312039	0.64809	1.70668	1.71467	1.61521	1.93491	2.02956	1.6825	1.95515	2.13735	1.95996	1.96048	2.11609	2.05363	1.97974	2.03291	2.08369	1.92327
Q81CC4		+							+	+	+	-0.325387	-1.28513	-0.0661163	0.0712433	-0.0893548	-0.153051	0.0655117	0.0896791	-2.4841	-3.32018	-4.22947	0.341941	3.65e-05	0.999831	0.999319	0.999822	0.999689	0.993961	0.894183	1.05e-06	5.27e-09	1.51e-11	1.52685	1.43133	1.16205	-0.284134	0.324672	0.488102	1.93726	1.93349	2.16054	1.82739	2.08399	1.95812	2.13546	1.87572	2.07731	2.005
Q81IJ7		+							+	+	+	0.561776	-1.66886	-0.072621	-0.0992578	-0.0683409	-0.152742	-0.408675	-0.636036	-2.38441	-3.35726	-3.5364	0.660054	5.85e-09	0.999831	0.999319	0.999822	0.999689	0.365388	0.123047	5.67e-09	4.55e-12	3.25e-13	5.53325	6.03461	5.93454	3.12802	3.34779	3.62232	5.66733	5.60827	5.47637	5.60669	5.60766	5.35633	5.21928	5.51591	5.56249	5.56628
Q814S9									+	+	+	-0.411436	-0.424328	-0.0521158	-0.0892715	-0.302755	-0.152599	-0.379434	-0.518559	-1.91913	-1.84698	1.19943	0.00983243	7.34e-06	0.999831	0.999319	0.999822	0.999689	0.149748	0.0592486	2.73e-10	3.7e-10	4.95e-06	0.092968	0.389507	0.479115	0.113276	-0.141402	0.238686	0.999374	1.1569	0.974524	0.766673	1.14839	1.09594	0.98487	0.645853	1.07573	0.689335
Q81G02		+							+	+	+	-0.573984	-4.02536	-0.277644	0.228731	-0.0162214	-0.151369	0.153594	0.157436	-1.48155	-1.70461	-1.07468	0.242362	1.86e-10	0.999831	0.999319	0.999822	0.999689	0.981289	0.866626	0.00449409	0.00128983	0.0106736	0.0043354	-0.47142	-0.319955	-3.90803	-4.00284	-3.94267	1.13362	0.273416	0.462772	0.725059	-0.0964613	0.44484	1.54941	0.676132	0.173939	1.28972
Q81GY6		+							+	+	+	0.0141493	-3.6462	-0.307533	-0.182079	-0.109462	-0.151123	0.030859	-0.540798	-1.03327	-1.49975	-1.15343	0.451658	1.64e-16	0.999831	0.999319	0.999822	0.999689	0.985985	0.0970799	8.25e-05	2.66e-07	7.96e-07	-0.389864	-0.549391	-0.582807	-4.45588	-4.19844	-4.56114	-0.394487	-0.255944	0.0208168	-0.303828	-0.469388	-0.742435	-0.427903	-0.379652	-0.524822	-0.292645
Q81AD0									+	+	+	0.739871	1.34129	0.503129	0.289196	-0.759148	-0.14959	-0.30979	0.0562096	1.55201	2.82344	2.6873	0.695607	0.116613	0.999831	0.999319	0.999822	0.999689	0.821814	0.947495	0.00306861	3.16e-06	2.64e-05	-0.399786	-1.11386	-1.77187	-0.822018	-0.656787	-0.714798	-0.959681	-1.8426	-1.76795	-0.925567	-0.923003	-1.17572	-0.757022	-1.72276	-1.37939	-1.02939
Q81G12		+							+	+	+	-0.272934	-4.06791	-0.00182724	0.00700887	-0.0371857	-0.148683	-0.233694	-0.131905	-1.17525	-1.58642	-1.40356	0.151505	1.07e-15	0.999831	0.999319	0.999822	0.999689	0.617831	0.943461	0.000157879	2.14e-06	1.08e-06	1.58974	1.53673	1.57016	-2.91264	-2.11234	-2.37568	2.28343	1.76105	2.40584	2.2002	2.17388	2.10732	2.38385	1.74222	2.18875	2.25398
Q817Q6										+	+	0.046559	0.931447	0.0117982	-0.611242	-0.292644	-0.1486	-0.584969	-0.353706	-0.988165	-1.40404	-1.60559	0.865173	0.540519	0.999831	0.999319	0.999822	0.999689	0.669909	0.872423	0.153324	0.0403953	0.00707996	1.68685	0.865984	-0.505012	1.60818	0.115634	2.26632	0.949392	0.484502	1.40915	0.78332	1.37517	0.756511	-0.909862	0.73913	1.02352	0.111282
Q81DV7								+	+	+	+	0.349456	-0.239659	-0.0328674	-0.0537446	-0.0507666	-0.148208	-0.37697	-1.08692	-3.49919	-4.30084	-4.10355	0.941077	6.61e-05	0.999831	0.999319	0.999822	0.999689	0.128518	1.64e-05	1.4e-15	7.53e-18	5.26e-18	2.59237	2.31671	2.47172	1.39479	1.56888	1.93743	2.46845	2.2002	2.59867	2.42075	2.43907	2.34547	2.09559	2.27441	2.57957	2.28169
Q816P5		+							+	+	+	-0.254819	-4.25725	0.0349573	0.0156746	-0.250487	-0.148013	-0.0746803	0.0270373	-2.18218	-3.32002	-4.41612	0.603371	5.57e-10	0.999831	0.999319	0.999822	0.999689	0.971684	0.958782	0.000285535	7.84e-07	1.87e-09	1.35417	1.07041	1.25614	-1.02763	-4.07623	-3.93508	2.07647	1.57761	1.72599	1.91096	1.81266	1.79789	2.11955	1.73821	1.41281	1.7897
Q81IK9										+	+	0.359341	0.0225976	-0.159925	-0.22081	-0.286176	-0.147547	-0.514416	-0.363358	-0.072408	1.0659	1.18159	0.939319	0.0155925	0.999831	0.999319	0.999822	0.999689	0.0932431	0.373264	0.982071	8.09e-06	5.25e-05	5.07948	4.98463	5.24947	4.50128	4.6021	4.48761	4.91852	4.98256	5.26937	4.84554	4.88721	4.99449	4.66625	4.79262	4.89263	4.67354
Q812R5												0.344891	0.194185	-0.253892	-0.0772565	-0.309458	-0.146061	-0.296008	-0.29417	0.514579	0.451549	0.712772	0.970366	0.125237	0.999831	0.999319	0.999822	0.999689	0.462629	0.596296	0.0172553	0.0285702	0.0280033	0.724779	0.379076	0.415626	0.809065	0.15397	-0.608028	0.378572	0.471047	0.570082	0.253026	0.354896	0.0866671	0.364184	0.403887	0.263336	0.246721
Q81J07		+							+	+	+	0.206865	-1.88877	-0.417695	0.0121638	-0.246045	-0.146006	-0.177554	-0.771036	-2.70534	-3.04582	-2.38684	0.946766	2.58e-05	0.999831	0.999319	0.999822	0.999689	0.920629	0.370015	1.34e-05	1.9e-06	1.68e-05	-1.06588	-1.55526	-1.88643	-3.39956	-3.41286	-4.69439	-1.34921	-1.38827	-1.4558	-2.07308	-1.76933	-1.56738	-1.37414	-1.42117	-1.51799	-2.21498
Q81DP3		+										0.894103	2.68563	-0.228232	-0.680488	0.110488	-0.145985	-0.713876	-0.883762	0.0645911	-0.315615	-0.305031	0.62492	0.000465838	0.999831	0.999319	0.999822	0.999689	0.516186	0.346887	0.833464	0.686991	0.414589	2.92351	2.14517	2.96403	3.25358	5.16871	4.27263	2.01535	1.88883	2.38111	1.66374	2.17677	1.79664	0.838031	1.33579	1.91348	1.58341
Q81AI8		+							+	+	+	0.593415	-1.02266	-0.0444794	-0.0585028	0.0143579	-0.145915	0.0236499	-0.584173	-1.85401	-1.34678	-1.2847	0.763472	0.000649295	0.999831	0.999319	0.999822	0.999689	0.985985	0.463461	0.000219299	0.00509524	0.00159336	0.68977	0.0881729	0.222728	-1.22966	-3.05867	-0.271591	0.0817127	-0.0465765	0.120184	-0.132806	0.041007	0.150243	0.237126	-0.507278	0.0934391	0.302343
Q81ID9		+							+	+	+	1.1292	-2.28841	-0.0630538	-0.51286	-1.12761	-0.145381	-0.0274226	-0.108085	1.31823	1.21489	1.70125	0.193703	6.63e-08	0.999831	0.999319	0.880151	0.999689	0.981289	0.979879	0.00135406	0.00236531	0.00052257	0.159168	-0.428772	-0.652198	-4.58285	-4.04733	-3.2568	-0.68576	-1.02987	-1.65889	-1.08993	-1.09396	-1.34323	-1.2363	-2.23147	-1.60185	-1.49363
Q817E1		+							+	+	+	0.124303	-1.02412	-0.150692	-0.242978	-0.135266	-0.145255	-0.129161	-0.169764	1.20328	1.96463	1.77365	0.571723	1.52e-10	0.999831	0.999319	0.999822	0.999689	0.600955	0.790178	1.93e-08	1.33e-12	1.73e-10	1.56201	1.36416	1.52246	0.324741	0.0906534	-0.124405	1.82568	1.40006	1.78487	1.57085	1.55534	1.4689	1.63353	1.19382	1.2978	1.39966
Q818Q9									+	+	+	-0.101986	0.389033	-0.143963	-0.0965811	0.0817356	-0.145153	-0.313886	-0.665744	-3.08678	-3.59352	-3.72195	0.58726	0.664447	0.999831	0.999319	0.999822	0.999689	0.677547	0.279027	1.25e-08	4.42e-10	6.11e-11	0.168488	-0.107882	0.314351	0.311802	0.202172	0.621683	0.459414	0.619542	0.536854	0.0550947	0.668309	0.497077	0.0909243	0.258678	0.819939	-0.0436344
Q81J31												-0.596004	-0.347783	0.0141055	0.207538	0.111581	-0.144868	0.302933	0.505476	0.875745	0.559076	0.335969	0.0475986	0.00427138	0.999831	0.999319	0.999822	0.999689	0.782162	0.184632	0.00360458	0.0411375	0.63065	1.77681	2.41028	2.54239	2.41973	2.0426	2.29946	3.08965	3.43643	2.92629	3.03302	3.37984	3.1184	2.97403	3.45425	3.49018	2.78269
Q81C90		+							+	+	+	0.145109	-1.3396	-0.0579904	0.119163	-0.067819	-0.144741	-0.309463	-0.806262	-2.88568	-3.69337	-5.14085	0.789612	1.09e-07	0.999831	0.999319	0.999822	0.999689	0.528277	0.0348477	1.67e-10	8.09e-13	2.64e-16	2.86142	2.56235	2.51125	0.52113	0.827327	1.42009	2.93254	2.56983	2.93222	2.9076	2.68227	2.70731	2.92151	2.78333	2.93071	3.01975
Q81C01									+	+	+	-0.193192	1.26187	-0.103441	-0.24393	-0.184443	-0.144272	-0.238393	-0.359523	-2.33966	-3.2784	-2.81273	0.660054	0.191851	0.999831	0.999319	0.999822	0.999689	0.90317	0.847539	0.000246904	2.34e-06	6.87e-06	1.36865	1.01742	0.161431	2.49366	0.596335	3.11035	1.62533	1.02422	1.41242	1.12963	1.14677	1.51182	1.46373	0.659554	1.05037	0.762344
Q81HN6									+			-0.228444	-0.520583	-0.344658	-0.159836	-0.0854212	-0.144182	-0.0925585	-0.358246	-1.4309	-0.86779	-0.769167	0.31598	0.00137384	0.999831	0.999319	0.999822	0.999689	0.920629	0.628596	0.00014829	0.0162489	0.00473426	-3.65781	-3.86549	-2.90472	-3.73105	-4.29922	-3.98652	-2.72685	-3.16335	-2.91758	-3.01238	-3.21949	-3.57334	-2.60593	-3.51778	-3.32012	-2.78568
Q815Y9		+									+	-0.111294	-1.72311	-0.118832	-0.100941	-0.129527	-0.142078	-0.0620003	-0.133883	-0.263721	-0.673521	-1.23181	0.154565	2.82e-12	0.999831	0.999319	0.999822	0.999689	0.859839	0.902634	0.311218	0.00293561	3.69e-08	3.26349	2.7068	2.97344	0.581499	1.31619	1.49826	3.34686	3.30788	3.55778	3.22365	3.31714	3.3518	3.38305	3.1953	3.17482	3.17219
Q819E5		+								+	+	-0.226116	-2.38983	-0.071003	-0.120829	-0.0663452	-0.142021	0.135875	-0.0193322	-1.28449	-1.52866	-1.37395	0.686797	4e-05	0.999831	0.999319	0.999822	0.999689	0.985985	0.990367	0.0590476	0.0257061	0.0179202	0.864634	0.497686	0.893348	-4.34743	0.0493517	-0.64975	1.33136	1.01994	1.51761	1.18493	1.04761	1.45992	1.20904	0.955379	1.18548	1.25173
Q81J98												0.0282993	0.505701	-0.212236	-0.0795288	-0.161645	-0.141694	0.074941	0.0383485	0.498967	0.476968	0.792265	0.462225	0.839249	0.999831	0.999319	0.999822	0.999689	0.985985	0.860889	0.0100748	0.0109742	0.00560706	0.635908	1.28179	1.41802	1.17311	1.29626	1.5862	1.10871	1.37536	1.70165	0.869777	1.35425	1.36155	1.03849	1.41998	1.33213	1.13835
Q81J62		+										0.207436	2.10516	-0.15436	-0.0232124	-0.0687033	-0.140575	-0.354382	-0.194959	0.342805	0.614745	0.749027	0.846181	8.97e-08	0.999831	0.999319	0.999822	0.999689	0.312567	0.821858	0.0722403	0.00335096	0.0142494	-1.2701	-1.08879	-0.829036	0.455488	0.496097	0.841301	-1.14938	-1.00825	-0.717712	-1.12321	-1.20187	-0.976775	-1.43162	-0.656214	-1.01367	-1.14463
Q817C7		+							+	+	+	0.206578	-1.73636	-0.11099	-0.195723	-0.22382	-0.14025	0.124997	-0.21935	-1.42803	-2.0814	-2.57558	0.939319	1.68e-05	0.999831	0.999319	0.999822	0.999689	0.984135	0.915956	0.00515942	0.000111476	1.45e-06	-0.311577	-1.0418	-1.07626	-2.67013	-3.13177	-3.16892	-0.345167	-1.29426	-0.475052	-0.563813	-0.991424	-0.855647	-0.23145	-1.3662	-1.26052	-0.787197
Q819R3		+								+	+	0.468245	1.46014	-0.0234667	0.0347182	-0.168403	-0.140227	-0.225314	-0.353739	0.585321	1.13157	1.7868	0.656478	4.42e-06	0.999831	0.999319	0.999822	0.999689	0.370766	0.231365	0.000413895	5.85e-08	3.36e-10	1.71007	1.93173	1.9921	2.75699	2.38612	2.75412	1.51657	1.69827	1.94921	1.51691	1.76197	1.85134	1.6334	1.66756	1.81073	1.49563
Q81EL6		+						+	+	+	+	-0.0260614	1.29093	-0.0992235	-0.244757	-0.226913	-0.140074	0.38741	2.14755	2.94796	3.10137	3.47868	0.327416	0.00065741	0.999831	0.999319	0.999822	0.999689	0.40092	3.29e-10	2.63e-13	4.37e-14	9.46e-15	0.305105	-0.28573	-0.304183	0.906815	1.27283	0.774162	0.275543	0.114877	0.337851	0.0433702	0.174468	0.249324	0.0354261	-0.157183	-0.0407696	-0.186844
Q81BX0									+	+		0.177854	-0.376809	0.00727018	0.119461	-0.328228	-0.1398	0.150448	-0.0522671	-1.4417	-1.97108	-0.733372	0.903112	0.0190128	0.999831	0.999319	0.999822	0.999689	0.971684	0.993863	0.0011945	2.96e-05	0.024411	0.383821	-0.584198	-1.43763	-0.657856	-1.80819	-1.54831	-0.266668	-0.567443	-0.402565	-0.0671015	-0.374057	-0.737145	-0.335505	-0.656969	-0.0423431	-0.809612
Q816D9										+	+	0.25755	-0.659374	-0.0531063	-0.0936972	-0.161545	-0.137406	-0.232335	-0.41227	0.247925	1.20199	1.27735	0.939319	1.23e-05	0.999831	0.999319	0.999822	0.999689	0.59157	0.340216	0.19771	6.7e-06	5.78e-05	1.25367	1.13329	1.12077	0.801323	-0.756331	-0.000391006	1.23208	1.00741	1.43048	1.09067	1.22078	1.23577	1.24885	0.949144	1.03436	1.10204
Q816X1										+		0.211718	-0.334895	-0.0866884	-0.14537	-0.197822	-0.137136	-0.164454	-0.212741	0.528849	1.07727	0.691641	0.822201	3.37e-05	0.999831	0.999319	0.999822	0.999689	0.595738	0.704964	0.00294372	8.79e-07	0.0090597	1.35514	1.71319	1.77156	1.02102	1.10247	0.364197	1.59862	1.74394	1.79707	1.73119	1.59583	1.58911	1.42954	1.58619	1.53126	1.49092
Q81CC8		+							+	+	+	0.187547	-2.67086	-0.0264428	-0.417699	-0.38059	-0.136382	-0.625645	-0.742723	-3.86891	-3.78853	-2.96627	0.944677	4.7e-06	0.999831	0.999319	0.999822	0.999689	0.610639	0.492146	5.76e-07	6.8e-07	8.58e-06	-0.204908	-0.453461	-0.778901	-3.44671	-3.35805	-3.9201	-0.194067	-0.633151	-0.237799	-0.200988	-0.544501	-0.362294	-0.249339	-1.69783	-0.527468	-0.985785
Q817V4												0.876646	-0.253309	-0.325811	0.0672843	0.0596078	-0.135751	-0.606428	-0.23191	-0.113477	0.193567	0.00825818	0.30165	0.0139448	0.999831	0.999319	0.999822	0.999689	0.25579	0.850636	0.893919	0.407492	0.619478	-1.075	-1.27912	-1.36869	-1.8695	-2.5801	-3.37543	-1.66954	-1.67153	-2.07678	-1.7318	-1.7629	-2.86402	-1.66584	-1.89493	-1.81176	-1.44852
Q812R2									+	+	+	-0.596191	0.847528	-0.114469	-0.104531	-0.218792	-0.135386	-0.574782	-0.805205	-2.54685	-3.20183	-3.6257	0.0245909	0.25276	0.999831	0.999319	0.999822	0.999689	0.144912	0.0291476	9.43e-10	6.62e-12	1.13e-13	3.98276	4.23375	4.57749	5.24908	5.61739	5.54633	4.98364	5.14125	5.39258	5.04942	5.06233	5.09888	4.6544	5.04228	5.35068	4.73827
Q815Y7		+							+			-0.254515	-2.80163	-0.18895	-0.117294	-0.19585	-0.134871	-0.00718053	0.290988	1.11567	0.948064	0.364963	0.229007	7.83e-12	0.999831	0.999319	0.999822	0.999689	0.97863	0.459679	0.000299707	0.00116281	0.549297	-0.75543	-0.701668	-0.305766	-3.93384	-3.9617	-2.22104	-0.104658	-0.050313	0.0905457	-0.22055	-0.21099	-0.163175	-0.286502	-0.17569	-0.110641	-0.137878
Q819V5		+										0.0299943	-2.34945	-0.179216	-0.226988	-0.114127	-0.134087	0.0243231	0.0293458	0.403934	0.285863	0.417329	0.62492	3.47e-11	0.999831	0.999319	0.999822	0.999689	0.985985	0.914634	0.0924503	0.18863	0.406266	0.432121	0.137978	-0.194324	-1.54602	-3.24957	-2.67933	0.340464	0.279603	0.60062	0.175488	0.346839	0.197272	0.364896	-0.0429726	0.0612736	0.43824
Q817L4		+							+	+	+	-0.0697804	-1.24296	0.0652809	-0.0353012	-0.119525	-0.132513	-0.0435505	-0.142987	-2.2074	-3.38803	-2.2448	0.408514	1e-07	0.999831	0.999319	0.999822	0.999689	0.933145	0.928091	9.24e-09	1.32e-12	5.39e-10	1.03402	0.90943	1.02077	-0.830538	-0.725335	0.28821	1.45658	1.18029	1.47159	1.35726	1.56931	1.41429	1.52223	0.985714	1.33808	1.38714
Q818V8		+										-0.249322	-2.06536	-0.0434367	-0.0260728	-0.0421619	-0.132379	0.28319	-0.29449	-0.702709	-0.071125	0.459164	0.46128	4.76e-07	0.999831	0.999319	0.999822	0.999689	0.898724	0.834928	0.133797	0.987273	0.521895	-0.37719	-1.39135	-0.974414	-1.52626	-4.15597	-3.22121	-0.469694	-0.49808	-0.0923195	-0.499965	-0.415202	-0.238675	-0.286262	-0.579336	-0.429239	-0.318039
Q81F89		+							+	+	+	0.829835	-1.09597	-0.0583483	0.207184	-0.033165	-0.13199	0.33547	-0.0147629	-2.36305	-3.24632	-2.72332	0.695607	0.00946139	0.999831	0.999319	0.999822	0.999689	0.924184	0.988825	0.000746767	1.48e-05	5.05e-05	-0.221807	-0.524467	-0.0631742	-0.285566	-3.4757	-3.53797	-0.939796	-1.24836	-0.175905	-1.42833	-0.555766	-0.518445	-0.203885	-1.22406	-0.471083	-0.410454
Q81IC5								+	+	+	+	0.604348	-0.495421	-0.161309	0.12661	-0.317996	-0.131732	-0.480305	1.49647	4.05355	4.69845	5.16779	0.806239	0.0396396	0.999831	0.999319	0.999822	0.999689	0.642793	0.0160134	1.41e-08	5.4e-10	2.48e-10	-1.83008	-3.65058	-3.15013	-3.761	-3.82686	-5.05458	-3.1128	-3.06041	-3.33573	-3.19442	-3.0904	-3.67147	-2.81247	-2.99523	-3.47792	-3.67101
Q81HW6		+								+	+	0.384629	-2.2056	-0.119567	0.104532	-0.0966345	-0.130335	-0.16994	-0.147467	0.230127	1.68455	2.00746	0.924823	1.06e-11	0.999831	0.999319	0.999822	0.999689	0.711793	0.915956	0.237956	6.66e-08	3.78e-08	1.67346	1.10478	1.27634	-1.21052	-1.0034	-2.21455	1.20617	1.1516	1.47781	1.07419	1.28476	1.1545	1.30285	1.25389	1.43592	1.33539
Q817Z6												0.385892	0.844558	-0.152732	-0.0799281	-0.145655	-0.13017	-0.202603	-0.467518	0.180779	0.22213	0.966725	0.934682	0.27697	0.999831	0.999319	0.999822	0.999689	0.71008	0.340803	0.389924	0.282704	0.0067558	1.9787	2.78434	3.07423	2.90163	2.62454	2.97474	2.23717	2.69255	2.68477	2.16035	2.61903	2.41348	2.09102	2.553	2.57417	2.17365
Q81IA5									+	+	+	0.425345	0.337487	-0.0474962	-0.118486	-0.206144	-0.130009	-0.170918	-0.761446	-2.46447	-3.12804	-3.51485	0.939319	0.664829	0.999831	0.999319	0.999822	0.999689	0.920629	0.360195	3.14e-05	7.96e-07	3.42e-08	-0.0397186	-0.992373	-1.00186	-0.968887	-1.49921	-0.541784	-0.752323	-1.09781	-0.524954	-0.836535	-0.954625	-0.689857	-0.945239	-0.918135	-1.0237	-0.916712
Q815T1		+										-1.39162	-2.4138	-0.365897	-0.881992	-0.0710061	-0.129641	-0.102374	-0.547751	0.516356	0.468796	0.830365	0.148494	0.00029217	0.999831	0.999319	0.999822	0.999689	0.981289	0.792294	0.461779	0.47648	0.407568	-1.58386	-4.08622	-1.881	-4.43042	-3.08621	-3.81335	-0.836807	-0.669959	-0.934559	-1.02952	-1.145	-1.32793	-0.867215	-4.107	-0.269615	-0.958485
Q816X5		+							+	+	+	0.534439	-1.19036	-0.10627	-0.0340748	-0.377922	-0.12939	0.231054	0.60184	1.66537	1.61248	1.80408	0.83072	0.000260014	0.999831	0.999319	0.999822	0.999689	0.933145	0.317112	0.000360087	0.000420455	0.000666993	-0.882013	-1.09718	-1.08319	-1.57309	-2.91664	-4.45939	-1.08511	-1.28197	-1.36372	-0.925332	-1.27271	-1.81501	-1.4669	-1.33351	-1.18914	-1.61843
Q818S2									+	+	+	0.678363	-0.530811	-0.0413081	-0.316679	-0.526855	-0.128192	-1.06135	-0.68125	-3.50637	-3.39565	-2.10747	0.847959	0.173332	0.999831	0.999319	0.999822	0.999689	0.506955	0.718564	0.000157189	0.000211541	0.00690858	-0.33642	-1.12152	-1.15355	-3.15258	-3.90752	0.108742	-0.82346	-1.45615	-1.43207	-1.04381	-1.41405	-1.34117	-1.15719	-2.15045	-1.5106	-1.26385
Q818U8									+	+	+	0.627822	0.804421	-0.0743567	-0.0769221	-0.0595481	-0.128004	-0.274021	-0.11924	1.1542	2.39958	2.50826	0.453818	0.258228	0.999831	0.999319	0.999822	0.999689	0.483541	0.947495	1e-05	3.69e-11	1.23e-10	0.462145	1.1341	1.09542	0.744783	0.835141	0.929176	0.510864	0.59928	0.632944	0.259873	0.706252	0.590455	0.374318	0.332668	0.648811	0.473476
Q819K4												0.415152	-0.461128	-0.0699393	0.0192108	-0.0184523	-0.127935	-0.211894	-0.0546055	0.907487	0.697772	0.543347	0.759781	2.58e-07	0.999831	0.999319	0.999822	0.999689	0.357521	0.991318	7.57e-07	1.76e-05	0.0229323	5.414	5.42528	5.37768	4.4767	3.86981	4.52925	5.26952	5.31539	5.32149	5.18715	5.33424	5.21176	5.20774	5.26859	5.33118	5.18622
Q817R4		+							+	+	+	-0.363111	-2.7097	-0.00636991	0.050127	-0.175585	-0.127465	-0.396334	-0.366916	-2.37061	-3.17407	-5.55883	0.0544705	1.31e-13	0.999831	0.999319	0.999822	0.999689	0.286351	0.416305	3.54e-10	7.14e-13	5.26e-18	2.48256	1.99347	1.91063	-0.736588	-0.264449	-0.364426	2.90602	2.71172	2.79315	2.75066	2.87145	2.80623	2.90212	2.66647	2.83616	2.49186
Q81GN8		+							+	+	+	-0.163162	-3.23622	-0.233693	-0.125229	-0.0270894	-0.127031	-0.0973968	-0.300365	-2.91864	-3.2699	-3.44595	0.630257	6.27e-09	0.999831	0.999319	0.999822	0.999689	0.947664	0.855621	1.27e-06	1.63e-07	1.85e-08	-0.42635	-0.830122	-0.739636	-2.40618	-4.88276	-4.63871	0.0488281	-0.657134	0.0365772	-0.3112	-0.497321	-0.427724	-0.0124884	-0.679914	-0.411537	0.054142
Q81DV6		+							+	+	+	-0.0124639	-1.01039	0.106102	-0.388656	-0.250564	-0.126852	0.0302823	-1.12862	-2.1498	-2.47657	-1.84434	0.844756	0.0244706	0.999831	0.999319	0.999822	0.999689	0.990852	0.312398	0.00442502	0.00123805	0.00547049	-1.37408	-2.80865	-2.30042	-3.03243	-3.8858	-3.27104	-1.40128	-2.20304	-1.90654	-1.17869	-1.92156	-2.05574	-1.34229	-2.89296	-2.5981	-1.35185
Q819P1		+										0.402696	-2.46671	-0.0488345	0.14827	-0.0429376	-0.126674	-0.0664997	-0.0853812	0.269932	0.259831	0.288035	0.934349	9.81e-10	0.999831	0.999319	0.999822	0.999689	0.93998	0.991318	0.334213	0.322443	0.767819	-0.0871334	0.035202	-0.0765085	-3.02169	-4.41089	-2.01643	-0.13253	0.0263243	-0.295427	-0.246074	-0.275212	0.00971127	-0.140241	-0.0626316	0.0895233	-0.234514
Q81BY3		+							+	+	+	-0.0333157	-2.39135	-0.0267537	-0.404699	0.04761	-0.125668	-0.316181	-0.540465	-2.45949	-2.92688	-2.98574	0.660054	1.63e-08	0.999831	0.999319	0.999822	0.999689	0.692534	0.443443	8.49e-07	3.53e-08	5.66e-09	-0.849838	-1.54856	-2.39237	-4.56987	-3.87355	-4.13379	-0.936995	-1.86164	-0.957296	-1.01372	-1.25014	-1.53576	-1.29313	-2.09298	-1.74045	-1.38375
Q814B1										+	+	0.902219	0.847651	-0.00640678	0.103516	-0.0692851	-0.125528	-0.29871	-0.28392	0.908573	1.15066	1.42821	0.0813932	0.175948	0.999831	0.999319	0.999822	0.999689	0.418221	0.595527	0.000127741	5.03e-06	4.29e-06	1.73934	2.22462	2.11878	2.16693	1.79752	1.24224	1.42932	1.40295	1.47872	1.25902	1.61032	1.45899	1.10621	1.6211	1.7377	1.33507
Q817G4		+										0.291479	-1.57222	-0.0906423	-0.128621	-0.245115	-0.125311	-0.260667	-0.351418	-0.145247	-0.0402203	0.104713	0.987413	1.02e-10	0.999831	0.999319	0.999822	0.999689	0.462629	0.389226	0.735335	0.871308	0.745913	2.47654	1.99908	2.01082	0.736185	-0.0112772	-0.541927	2.20109	2.14647	2.19933	2.03428	2.10931	2.16794	2.03772	1.9726	1.99418	2.05834
P60180												0.272185	-0.629641	-0.0981897	-0.332449	-0.250545	-0.124937	-0.382973	-0.262599	0.734994	0.807613	0.679614	0.953356	5.56e-06	0.999831	0.999319	0.999822	0.999689	0.264782	0.628596	0.000817981	0.000265167	0.0274179	4.17299	3.9247	4.14599	2.4681	3.50607	2.85167	4.11771	4.0675	4.17681	3.94013	4.12598	4.0379	3.52705	3.63432	4.04677	3.83047
Q81C06		+							+		+	-0.26534	-1.25691	0.0546506	-0.454718	-0.233205	-0.124917	-0.647065	-0.987563	-1.21119	-1.00054	-1.22488	0.557627	0.000505259	0.999831	0.999319	0.999822	0.999689	0.476086	0.173775	0.0220587	0.0610905	0.00580663	-1.83401	-2.7924	-1.81235	-2.79088	-4.09419	-3.24077	-1.66857	-1.52038	-1.51889	-1.70742	-1.34276	-1.45715	-1.67325	-2.40919	-2.14608	-1.91306
Q819D1		+										0.551994	-2.21168	-0.118725	-0.250725	-0.37965	-0.124512	-0.409718	-0.590545	-0.0295029	0.0203902	-0.144413	0.888576	0.000108043	0.999831	0.999319	0.999822	0.999689	0.815209	0.687319	0.960757	0.889866	0.637279	0.359695	0.0347404	0.340892	-4.60099	-3.66747	0.000391006	-0.0996037	-0.0990744	0.212917	-0.126275	-0.167687	-0.0114126	-0.452321	-0.27702	-0.165121	-0.470451
Q81FW0										+	+	0.336666	0.339844	-0.0435899	-0.239082	-0.117732	-0.124383	-0.64742	-0.758076	-0.736076	-1.22021	-1.43686	0.992529	0.51756	0.999831	0.999319	0.999822	0.999689	0.230221	0.117679	0.0456557	0.00116281	2.27e-05	-0.141054	-0.147852	-0.301681	0.158768	-0.290847	-1.16133	-0.303619	-0.379848	0.0177765	-0.219121	-0.198268	-0.342509	-0.237363	-0.860462	-0.441635	-0.329561
Q81GI2									+	+	+	-0.955584	0.549098	-0.0858459	-0.334487	0.0944831	-0.123851	-0.315709	-0.334858	-2.50113	-2.43853	-2.28417	0.17358	0.999978	0.999831	0.999319	0.999822	0.999689	0.859839	0.872423	0.00024212	0.000303292	0.000200517	-3.4972	-3.07239	-3.00055	-1.7989	-2.21909	-1.75047	-1.6687	-2.16732	-1.93249	-2.16441	-1.96015	-1.86491	-1.78289	-2.62105	-2.52454	-2.029
Q81J97												0.184549	0.802862	-0.168203	-0.111401	-0.118987	-0.123785	0.0830358	0.40239	0.932994	0.769758	-0.459191	0.785018	0.210827	0.999831	0.999319	0.999822	0.999689	0.985985	0.089235	3.3e-05	0.000213247	0.00350436	3.30884	2.54606	2.31029	3.10759	3.11033	3.08986	2.87271	2.65171	3.02202	2.76665	2.65366	2.65808	2.81437	2.51264	2.72871	2.71523
Q818C8		+										0.573801	-1.33827	-0.143229	-0.234364	-0.120192	-0.122541	-0.242803	-0.555368	0.0577583	-0.0670891	-0.0595983	0.83072	0.000605803	0.999831	0.999319	0.999822	0.999689	0.88073	0.614164	0.826264	0.983762	0.665355	0.508512	-0.217587	-0.434022	-0.241295	-3.4784	-2.87197	-0.114124	-0.415977	-0.399504	-0.374024	-0.309958	-0.638747	-0.577716	-0.950567	-0.260939	-0.647511
Q81IH1												0.102276	-0.448148	0.216615	0.205986	0.104417	-0.122255	-0.0987504	0.295886	0.450902	0.632353	0.92586	0.852131	0.0320936	0.999831	0.999319	0.999822	0.999689	0.945902	0.713437	0.279121	0.130772	0.117991	-1.22768	-2.66312	-0.789897	-0.948524	-2.92756	-3.16824	-1.5834	-1.3778	-1.09143	-0.890271	-1.33977	-1.13618	-1.00335	-1.45972	-1.12812	-1.32738
Q81GW8		+										0.373877	-1.84382	-0.0158672	-0.0119584	-0.13485	-0.122243	-0.281753	-0.317403	-0.190844	0.947965	1.2372	0.989094	0.000927232	0.999831	0.999319	0.999822	0.999689	0.915364	0.902074	0.868114	0.135752	0.129338	1.13814	1.29101	1.33104	-4.1886	0.0847082	0.498642	1.08762	1.10763	1.3782	1.07755	1.24571	1.23915	1.11862	1.13804	1.1244	0.989403
Q819J5		+										0.0490602	-4.67104	-0.0337791	0.0668627	-0.156216	-0.121059	-0.218466	0.397682	0.96538	0.737328	-0.181669	0.888576	3.11e-08	0.999831	0.999319	0.999822	0.999689	0.933145	0.790178	0.151373	0.251882	0.631097	1.80095	2.48179	2.07461	-4.48379	0.237315	-4.26883	2.27701	2.45588	2.41217	2.24546	2.44866	2.38617	2.2527	2.43908	2.49734	2.25381
Q81H44		+							+	+		-0.0749442	-2.2414	-0.042785	-0.0224711	-0.246346	-0.120124	0.188365	-0.298937	-2.03653	-1.32811	-0.601946	0.698237	1.37e-06	0.999831	0.999319	0.999822	0.999689	0.970559	0.858932	0.000207924	0.0109742	0.107101	0.498013	0.549324	-1.3647	-3.31664	-1.14996	-3.06247	0.415596	0.212235	0.214535	0.198714	0.133914	0.417945	0.343392	0.307529	-0.0324936	-0.0800934
Q816J5		+										-0.0947183	-3.7889	-0.0970275	-0.0817935	-0.15169	-0.119041	-0.185809	-0.329243	-0.0640303	-0.135576	-0.335712	0.379378	4.79e-15	0.999831	0.999319	0.999822	0.999689	0.711793	0.578799	0.993184	0.84229	0.0578653	0.319674	-0.120695	0.304183	-4.78627	-3.24588	-3.25959	0.434067	0.519652	0.768492	0.400447	0.49834	0.568904	0.390985	0.406025	0.523296	0.50425
Q818U7		+										-0.0143522	-2.38347	-0.167039	-0.0430965	-0.0854511	-0.11801	-0.0319754	-0.272956	-0.928007	-0.309335	-0.255232	0.563934	3.06e-11	0.999831	0.999319	0.999822	0.999689	0.950601	0.724866	0.00327254	0.407492	0.123054	-2.11205	-1.48647	-1.2345	-5.10837	-3.52589	-4.01846	-1.32513	-1.30051	-1.22943	-1.24667	-1.64005	-1.4329	-1.28867	-1.27593	-1.57628	-1.29417
Q81BC1		+										-0.265663	-2.10579	-0.192123	-0.109435	-0.0871735	-0.117693	-0.0306002	-0.321688	-0.0155169	0.569057	0.470274	0.0416957	9.79e-14	0.999831	0.999319	0.999822	0.999689	0.920629	0.380007	0.803347	0.00129061	0.129289	1.20163	1.63301	1.56828	-0.528	-0.605685	-0.696142	1.99707	1.95498	2.18275	1.66748	2.0335	1.89402	1.94157	1.67867	2.02974	1.76198
Q81C45		+									+	0.328997	1.7072	-0.156642	-0.12403	-0.261703	-0.117517	-0.105285	-0.0978546	0.682512	0.859046	1.27357	0.99184	7.46e-06	0.999831	0.999319	0.999822	0.999689	0.811358	0.963953	0.00159516	0.000145592	2.14e-05	1.33807	1.50684	1.20255	2.08226	2.6786	2.70886	1.28157	1.2733	1.44049	1.03315	1.26536	1.26349	0.949655	1.28871	1.22838	0.843124
Q813W6		+										-0.332495	-2.63585	-0.104989	0.0348587	-0.0256939	-0.117195	-0.0541458	-0.0108541	-0.512751	-0.729471	0.428017	0.58726	3.88e-06	0.999831	0.999319	0.999822	0.999689	0.981289	0.984256	0.463399	0.265055	0.691176	-0.0633926	0.739096	0.653077	-4.51536	-0.59747	-1.18083	1.24965	1.06598	0.94553	1.09788	1.08101	0.80387	1.23735	0.947041	1.02482	0.984417
Q81DG6		+										1.16792	-1.40068	0.246105	0.0292002	-0.413038	-0.116299	0.0213706	-0.158379	-0.170773	-0.761801	-0.842749	0.412065	0.001487	0.999831	0.999319	0.999822	0.999689	0.985985	0.958782	0.870488	0.247555	0.088455	-0.49329	-1.48723	-1.16401	-3.69729	-4.88025	-2.98514	-1.5282	-1.44449	-2.7407	-1.33185	-1.68212	-1.92454	-1.71923	-2.51749	-1.54558	-2.28702
Q813F5												-0.67732	-0.440097	-0.242108	-0.0462646	-0.392207	-0.115861	-0.568623	0.304758	-0.19706	0.484002	0.325387	0.217411	0.0471482	0.999831	0.999319	0.999822	0.999689	0.579847	0.737859	0.812904	0.267379	0.789564	-4.06809	-2.84068	-4.23548	-3.18933	-3.41655	-4.53906	-2.4854	-3.05043	-2.64156	-2.37517	-2.71959	-3.7724	-2.5264	-3.21666	-2.72966	-2.05391
Q816B6		+										0.472218	-1.35834	-0.0911986	-0.176619	-0.209396	-0.115359	-0.126133	-0.217152	0.245213	0.405846	0.63843	0.789085	4.59e-08	0.999831	0.999319	0.999822	0.999689	0.825997	0.824983	0.246808	0.0698736	0.0887855	3.44615	3.37653	3.42024	1.73782	1.93279	0.368286	3.18773	3.26286	3.31056	3.16821	3.16107	3.19484	2.81387	3.09262	3.16829	3.12367
Q81FJ0									+	+	+	-0.00127729	-0.28266	-0.362858	-0.0473181	0.0151602	-0.11443	-0.195304	-0.641612	-3.42511	-3.87089	-3.9987	0.653086	0.0129399	0.999831	0.999319	0.999822	0.999689	0.802684	0.226466	2.09e-10	1.11e-11	1.52e-12	-0.350454	-0.253124	-1.15096	-0.755754	-1.28652	-1.26877	0.0355701	-0.687654	-0.163729	-0.157252	-0.368165	-1.34241	-0.453019	-0.409191	-0.252081	-0.309307
Q812J7									+	+	+	-0.505437	-0.994982	-0.418022	-0.29104	-0.0538953	-0.1144	0.07938	0.138649	1.02869	1.02821	1.29352	0.147992	0.000111901	0.999831	0.999319	0.999822	0.999689	0.985985	0.83327	0.00418223	0.00368536	0.00357691	-3.33378	-3.59789	-3.3115	-4.27649	-4.1559	-3.99178	-2.80307	-2.64183	-2.34706	-3.67525	-2.72124	-2.61298	-2.54202	-3.76112	-2.51847	-2.47926
Q819P2		+							+	+	+	-0.317181	-1.69356	-0.183027	-0.0663751	0.115899	-0.113416	0.00270399	-0.389104	-2.52757	-2.55307	-1.60376	0.273893	3.32e-07	0.999831	0.999319	0.999822	0.999689	0.984135	0.62808	1.21e-07	8.21e-08	1.43e-05	-1.93554	-2.07483	-2.10759	-2.98149	-3.80758	-4.17038	-1.47887	-1.69804	-1.05462	-1.57437	-1.58519	-1.58449	-1.30107	-1.68092	-1.60519	-1.34145
Q813E0		+										-0.120461	-1.42168	-0.585512	0.148308	0.0260264	-0.113194	0.162847	0.512042	0.941363	0.535576	-0.720249	0.65474	0.000106466	0.999831	0.999319	0.999822	0.999689	0.973018	0.43717	0.0326771	0.184973	0.0564616	-2.67568	-2.48746	-2.20681	-4.49451	-4.58906	-2.90239	-2.11521	-2.23274	-1.72573	-3.35446	-2.70277	-1.73642	-1.66157	-2.26344	-1.86027	-1.77596
Q814L5		+							+	+	+	0.144681	-2.92464	-0.177757	-0.0750001	-0.0880082	-0.112953	0.013244	0.978207	2.63285	3.20849	2.23491	0.810616	6.31e-12	0.999831	0.999319	0.999822	0.999689	0.984135	0.00617385	2.05e-09	2.8e-11	1.7e-07	-0.661402	-0.718731	-0.666461	-4.49199	-3.1259	-4.34903	-0.635576	-0.711715	-0.19845	-0.704083	-0.766065	-0.572303	-0.688718	-0.67515	-0.563398	-0.73167
Q81DU4												0.255625	-1.15836	0.812857	-0.234114	-0.202376	-0.112166	-0.916843	-1.05707	-0.187397	0.356185	-0.90955	0.993942	0.070995	0.999831	0.999319	0.999822	0.999689	0.669824	0.556563	0.909671	0.659264	0.26795	-0.760956	-3.98048	-2.09733	-3.18839	-4.52961	-4.07508	-1.64084	-2.75554	-2.27436	-0.999591	-1.70141	-1.49461	-1.40681	-4.26973	-1.85307	-2.30243
Q81IP9									+	+	+	0.394042	-0.318457	-0.138502	-0.0536938	-0.0512606	-0.11191	0.14515	0.627265	2.3443	2.24493	2.39164	0.839792	9.42e-06	0.999831	0.999319	0.999822	0.999689	0.906801	0.00125861	4.3e-13	3.83e-13	6.45e-13	2.69231	2.44898	2.61824	1.88262	1.58578	1.44128	2.30276	2.50351	2.70603	2.2081	2.44109	2.48417	2.28701	2.45782	2.44987	2.26917
Q81J61		+										0.232903	-1.39561	-0.125561	-0.235968	-0.0398877	-0.111073	-0.15037	-0.178071	0.462765	0.573322	0.6042	0.939319	4.81e-07	0.999831	0.999319	0.999822	0.999689	0.838938	0.902634	0.0931249	0.0397427	0.178611	2.84253	2.26294	2.14217	1.50393	-0.533217	0.679024	2.47641	2.38287	2.62454	2.33698	2.48295	2.32377	2.16231	2.07905	2.37802	2.28986
Q81CH3									+	+	+	0.457579	-0.253839	-0.0377515	-0.122814	-0.0355771	-0.110069	-0.263782	-0.96412	-1.05693	-1.50747	-1.81984	0.750764	0.000433559	0.999831	0.999319	0.999822	0.999689	0.457034	0.000941407	5.35e-05	1.96e-07	4.75e-10	2.02185	2.14758	2.50894	1.67074	0.785415	1.3756	2.09054	1.97941	2.17057	1.88676	2.28985	1.98722	1.82826	1.78564	2.10166	1.94965
Q819F4		+							+	+		0.32999	-4.1145	-0.172906	-0.223242	-0.181443	-0.109781	-0.226963	-0.616912	-1.48811	-1.09706	-0.405506	0.990865	6.45e-17	0.999831	0.999319	0.999822	0.999689	0.579847	0.0634208	8.85e-07	7.85e-05	0.013694	1.03185	0.612326	0.696147	-4.14251	-3.50897	-4.05405	0.763401	0.679011	0.842831	0.619088	0.607816	0.576184	0.62107	0.62278	0.215141	0.732344
Q818F6		+							+	+	+	0.465815	-2.50405	0.140447	0.0610739	-0.0724792	-0.108102	-0.340361	-0.488195	-2.79958	-3.18673	-3.61791	0.925472	2.02e-06	0.999831	0.999319	0.999822	0.999689	0.810331	0.700923	1.53e-05	1.86e-06	7.74e-08	0.317268	-0.0392418	-0.211032	-1.87209	-3.78226	-3.90061	0.0276661	-0.275847	-0.147373	0.0834169	-0.088748	0.0676794	0.0308218	-0.367613	-0.0320663	0.0268936
Q81FU6		+										0.259337	-1.68207	-0.164532	-0.153949	-0.110175	-0.107934	0.013291	-0.176448	-0.191507	-0.439245	-0.636731	0.987413	0.000142288	0.999831	0.999319	0.999822	0.999689	0.985985	0.953346	0.830989	0.507515	0.134247	0.397854	-0.0966969	-0.0121145	-0.90954	-0.939027	-4.39895	0.133554	0.0459013	0.26647	0.0320826	-0.0500784	0.00688648	0.0506716	-0.0911903	-0.131927	-0.0307159
Q817V7									+	+	+	0.362551	0.0704308	-0.150246	-0.032917	0.0885156	-0.106622	-0.068114	-0.238432	-1.47657	-2.35194	-1.90237	0.949696	0.066144	0.999831	0.999319	0.999822	0.999689	0.920629	0.790178	9.11e-06	2.51e-09	1.32e-08	0.0926762	0.15019	0.443839	-0.529455	-0.619658	0.247101	0.024929	0.00220776	0.506809	0.131991	0.0656309	-0.0778513	0.0259447	0.157593	0.0951328	0.165159
Q819R7											+	0.139579	-0.281418	0.524692	-0.00662995	-0.0690091	-0.106466	0.392827	-0.373588	0.435628	-0.376717	-2.23775	0.924474	0.140364	0.999831	0.999319	0.999822	0.999689	0.88073	0.844923	0.400338	0.612753	0.000169752	-0.941259	-1.24564	-1.09249	-1.90875	-2.08531	-1.26067	-0.994617	-0.376266	-1.39235	-0.735398	-0.182204	-0.23499	-0.681666	-1.55483	-0.703148	-1.66224
Q81GJ1									+	+	+	0.257327	-0.607665	0.109952	-0.00900777	-0.130409	-0.106029	0.0921516	-0.24004	-2.71742	-2.98314	-2.4483	0.982986	0.0209311	0.999831	0.999319	0.999822	0.999689	0.985985	0.910676	9.7e-06	1.98e-06	9.31e-06	-1.04782	-1.39465	-1.98576	-0.969448	-3.56018	-3.20593	-1.03666	-1.4721	-1.75655	-1.17026	-1.33188	-1.39675	-1.2334	-1.67348	-1.54198	-1.31841
Q81DR1									+	+		-0.0230306	-0.706115	-0.933959	-0.902677	-0.507791	-0.10551	-0.719138	0.0537065	1.60505	1.57198	1.31218	0.794971	0.0264088	0.999831	0.999319	0.999822	0.999689	0.509932	0.953617	0.00506594	0.00534214	0.0509544	-1.69042	-3.32465	-2.87456	-4.20655	-2.78483	-3.65987	-2.57197	-2.39529	-1.91839	-2.93091	-2.18865	-4.53141	-2.49072	-4.17457	-3.08491	-3.10681
Q815Z4		+									+	0.297105	1.23091	0.0112654	-0.23421	-0.393837	-0.105054	-0.27527	-0.338453	0.382974	0.730529	1.17924	0.994726	0.0135344	0.999831	0.999319	0.999822	0.999689	0.59157	0.578799	0.106241	0.00483142	0.000762251	-0.864574	0.0331211	0.134843	0.377371	0.568484	0.446587	-0.289623	-0.302173	-0.0612335	-0.2797	-0.112676	-0.190295	-0.414775	-0.824251	-0.273157	-0.451277
Q81IN3												0.310657	-0.941646	-0.119914	-0.0916437	-0.172618	-0.104801	-0.132514	-0.0966365	0.40227	0.265903	0.382247	0.997984	5.14e-11	0.999831	0.999319	0.999822	0.999689	0.535173	0.949417	0.00232715	0.0203914	0.168157	2.62601	2.69895	2.80958	1.48745	0.906577	1.27124	2.56531	2.71227	2.85989	2.50941	2.60458	2.70029	2.49319	2.54416	2.66866	2.57668
Q81FH7		+							+	+	+	0.0454865	-1.86853	-0.0236772	-0.112735	-0.282997	-0.10468	-0.0987663	-0.175933	-1.95706	-2.16236	-1.71214	0.745811	3.25e-07	0.999831	0.999319	0.999822	0.999689	0.931279	0.932299	2.01e-05	4.07e-06	1.74e-05	3.70202	3.14399	3.18249	1.7173	-0.0990343	1.95584	3.78882	3.43322	3.6049	3.71699	3.4648	3.61067	3.72929	3.27018	3.33274	3.60248
Q81FV0		+							+	+	+	0.663128	-1.3261	0.0549049	-0.152444	-0.0887305	-0.104165	-0.385983	-0.824881	-1.94586	-2.82223	-5.32802	0.673267	4.02e-05	0.999831	0.999319	0.999822	0.999689	0.62617	0.181106	5.58e-05	1.72e-07	3.16e-13	2.3755	1.8061	2.13253	0.836662	-0.448131	-0.754431	2.00989	1.52631	1.72344	1.67317	2.17358	1.61417	1.42954	1.42278	1.79346	1.34917
Q819W5												0.508097	-0.183723	0.0458501	-0.0970942	-0.0128899	-0.104118	-0.26409	-0.53503	0.121729	-0.660604	-0.0434589	0.805506	0.0307085	0.999831	0.999319	0.999822	0.999689	0.704112	0.372777	0.606554	0.089825	0.533128	0.064188	-0.0868568	-0.341977	-0.411442	-0.952247	-1.78878	-0.152071	-0.361094	-0.440878	-0.39924	-0.360658	-0.0200338	-0.378743	-1.0206	-0.00250626	-0.353992
Q81A74		+							+	+	+	-0.622811	-1.544	-0.130512	-0.0574156	-0.0752799	-0.103278	0.0623887	-0.177324	-1.75125	-1.8683	-2.37382	0.00347572	1.55e-10	0.999831	0.999319	0.999822	0.999689	0.992848	0.848356	2.05e-08	4.14e-09	4.33e-12	2.23409	2.37694	2.43281	1.16743	1.64694	0.753525	3.44209	3.05456	3.35052	3.40753	3.04739	3.03727	3.20558	3.01699	3.29582	3.08926
Q81J09								+	+	+	+	0.202847	0.152614	-0.0596739	0.0195656	-0.140792	-0.103038	-0.276613	-1.00745	-1.81256	-2.21466	-2.14224	0.839792	0.0774551	0.999831	0.999319	0.999822	0.999689	0.47441	0.00120273	3.15e-08	5.15e-10	1.08e-10	1.20356	1.11302	1.10964	0.930771	0.311023	1.32136	1.16601	1.4652	1.12136	1.08996	1.2304	1.28974	1.16768	1.14173	1.34533	0.997021
Q81A08		+							+	+	+	0.265422	-2.2301	-0.102971	-0.178599	-0.201685	-0.103013	-0.387124	-0.819553	-1.33119	-1.36178	-1.15138	0.925648	2.52e-15	0.999831	0.999319	0.999822	0.999689	0.0847751	0.00037561	2.92e-08	1.42e-08	7.92e-09	3.18758	3.62455	3.40278	0.925161	0.758546	0.332296	3.50184	3.4872	3.3645	3.40779	3.25972	3.41368	3.33716	3.08494	3.23912	3.10024
Q81A15												0.137667	0.725028	-0.189372	-0.0233796	-0.0399164	-0.102963	0.0628217	-0.0637163	-0.14018	0.117748	0.679471	0.630257	0.295271	0.999831	0.999319	0.999822	0.999689	0.991494	0.998719	0.691107	0.258342	0.00559464	0.239639	0.392216	-0.0153475	0.39875	0.67315	0.594336	0.435717	0.268979	0.433706	0.335818	0.0964804	0.174548	0.511849	0.177099	0.22279	0.390394
Q81EF1										+	+	0.198063	0.3393	0.352467	-0.185039	0.314345	-0.102664	0.151277	-0.174746	-0.946721	-1.06031	-1.06903	0.914778	0.550927	0.999831	0.999319	0.999822	0.999689	0.971427	0.92378	0.016987	0.00805006	0.00113145	-2.3372	-3.61319	-3.92819	-3.76237	-3.31062	-3.09424	-2.57553	-3.24486	-3.71748	-2.61421	-2.92582	-2.90388	-3.55418	-3.40723	-3.28811	-2.49543
Q819Y6		+										0.553516	-3.05702	-0.153716	-0.0915782	-0.0598564	-0.102601	-0.225192	-0.168411	0.528745	0.261537	0.00778326	0.597108	4.95e-15	0.999831	0.999319	0.999822	0.999689	0.560884	0.866626	0.00977608	0.126554	0.457151	3.29764	3.03742	2.9961	-0.285875	-0.569978	-1.35695	2.83726	2.87069	2.89756	2.63508	2.87547	2.67037	2.52209	2.77026	2.8819	2.66115
Q814G4									+	+		0.486495	0.110026	-0.0779196	-0.106969	-0.17039	-0.102411	0.342986	0.512231	1.22428	1.04568	0.809596	0.575035	0.00479764	0.999831	0.999319	0.999822	0.999689	0.308422	0.00267305	5.24e-09	3.75e-08	0.000197129	2.08553	2.00402	1.86655	1.48982	1.20643	1.41809	1.87937	1.73118	1.82097	1.85195	1.68205	1.70031	1.68731	1.68966	1.57711	1.83031
Q81DR7									+	+	+	-0.128171	-0.0161902	0.0526072	0.0878938	-0.154174	-0.102037	0.0048434	-0.118629	-2.47909	-3.39378	1.10353	0.230296	0.0143609	0.999831	0.999319	0.999822	0.999689	0.973018	0.947495	1.1e-10	1.55e-13	0.00027581	0.74478	0.835857	0.600818	0.857122	0.0680189	0.879898	1.40438	1.12012	0.976362	1.28833	1.21875	1.18816	1.49968	0.985092	1.12325	1.22841
Q817Q5												0.356157	0.268571	0.123392	0.211821	0.198939	-0.100974	-0.392569	-0.554897	0.30234	0.334613	0.200471	0.982488	0.479378	0.999831	0.999319	0.999822	0.999689	0.617831	0.454818	0.375178	0.308134	0.963123	-0.578367	-0.0529327	-0.0171824	0.300453	0.181663	-2.10571	-0.00621033	-0.584498	-0.191349	-0.251824	-0.289144	0.165648	-0.205483	-0.237263	0.139627	-0.217241
Q81G06		+							+	+	+	-0.376028	-2.68287	-0.116288	-0.0438798	-0.11807	-0.100726	-0.178375	-0.226162	-2.09064	-2.80769	-3.33917	0.162739	6.14e-11	0.999831	0.999319	0.999822	0.999689	0.810331	0.851318	5.5e-07	2.27e-09	1.65e-11	-0.277599	-0.872454	-0.889377	-2.37638	-3.93034	-3.36559	0.436026	-0.447877	0.0354004	-0.270907	-0.141503	0.123658	0.249732	-0.410778	-0.103569	-0.0265732
Q81FW4									+	+	+	0.47371	0.392333	-0.00131225	-0.234434	-0.0783005	-0.100474	-0.348634	-0.622494	-1.07936	-1.05256	-1.69507	0.839792	0.635131	0.999831	0.999319	0.999822	0.999689	0.59157	0.253334	0.00409991	0.0052411	3.62e-06	2.2608	1.67566	1.51474	1.60069	1.56228	1.33175	1.72927	1.76551	1.47019	1.54945	1.76488	1.68326	1.37492	1.25249	1.47773	1.44909
Q816G9		+									+	0.0273183	-1.50029	-0.0608743	-0.110661	-0.387516	-0.100376	-0.25619	-0.170778	-0.61316	0.922843	1.128	0.779304	5.83e-05	0.999831	0.999319	0.999822	0.999689	0.829282	0.947495	0.24011	0.0316612	0.0425839	-0.0233421	-0.887663	-1.28642	-1.3854	-4.13545	-1.97175	-0.0857143	-0.783681	-0.475088	-0.426881	-0.513982	-0.549682	-0.33023	-0.813742	-0.689018	-0.516787
Q81IP3												0.224606	-0.839853	-0.189595	-0.134191	-0.165225	-0.0996965	-0.0731119	0.0912406	0.646713	0.480066	0.802336	0.829888	5.19e-09	0.999831	0.999319	0.999822	0.999689	0.802684	0.628596	0.000188223	0.00205051	0.000751609	-0.278603	-0.179546	-0.0586081	-1.40722	-1.33534	-1.67993	-0.275711	-0.327222	0.347254	-0.216615	-0.273482	-0.297805	-0.222274	-0.3965	-0.196003	-0.212982
Q819Z3												0.485479	0.839772	-0.190165	-0.222934	-0.119223	-0.0987644	-0.251738	-0.808698	-0.558362	-0.429534	-0.235882	0.734117	0.210449	0.999831	0.999319	0.999822	0.999689	0.541862	0.0126508	0.042086	0.139623	0.0861008	2.574	2.82168	2.8849	2.78834	3.03879	2.80396	2.36384	2.7108	2.68439	2.28291	2.58991	2.35227	2.02835	2.54733	2.35803	2.24783
Q814T5												0.694277	-0.117627	-0.160038	-0.357832	-0.202694	-0.0986512	-0.22835	-0.421391	0.833163	0.82356	0.987508	0.314784	0.00386632	0.999831	0.999319	0.999822	0.999689	0.562643	0.286315	0.000300912	0.000264225	0.000867133	4.97184	5.10224	5.21303	4.03963	4.24787	3.85153	4.8065	4.55133	4.78134	4.46815	4.61442	4.61305	4.29484	4.22805	4.38626	4.55995
Q81B82		+								+	+	-0.30084	-2.56275	0.123461	0.00105476	-0.2362	-0.0983741	-0.279482	0.296399	-0.806185	-1.39327	-2.40014	0.623688	7.39e-06	0.999831	0.999319	0.999822	0.999689	0.883369	0.807103	0.222615	0.0303705	0.000115211	-0.127552	-0.379904	-0.728963	-1.30674	-2.81341	-4.61434	0.379215	0.347228	-0.125446	0.253255	0.23837	0.516318	0.418469	-0.0203266	0.0494938	0.287779
Q818P9											+	0.129276	0.279156	-0.156564	-0.0714003	-0.0634747	-0.0977313	-0.0956103	-0.211179	0.154832	0.574247	1.04024	0.449726	0.0377122	0.999831	0.999319	0.999822	0.999689	0.598599	0.501347	0.0961437	1.86e-05	3e-07	1.69655	1.50642	1.47113	1.35218	1.31255	1.74665	1.7147	1.62792	1.87854	1.715	1.62894	1.44409	1.63917	1.55264	1.65862	1.69687
Q81F27									+	+	+	-0.12706	-0.645226	-0.129793	-0.29088	-0.107164	-0.0974814	0.160704	-0.114091	-1.37665	-1.67601	-1.41333	0.128521	3.36e-07	0.999831	0.999319	0.999822	0.999689	0.890132	0.941172	1.22e-07	2.61e-09	2.97e-09	0.545103	0.315331	0.344174	-0.373177	-0.14387	-0.545198	0.959314	0.673316	0.888052	0.731229	0.615811	0.820825	0.699574	0.140387	0.651558	0.711082
Q81BY4									+	+	+	0.280331	-0.36325	-0.0993621	-0.0586281	-0.13155	-0.0971381	-0.0554314	-0.173392	-2.00793	-2.58071	-3.84704	0.992932	0.050286	0.999831	0.999319	0.999822	0.999689	0.971684	0.947889	0.000225201	7.53e-06	3e-09	1.18404	0.43058	0.247489	0.284538	-0.444289	-0.621241	0.860275	0.375871	0.719864	0.549825	0.485404	0.659257	0.970447	0.319809	0.333345	0.843502
Q819E9												0.387309	0.00595283	-0.0392672	-0.00832303	-0.0602411	-0.0959536	-0.0167484	-0.134593	-0.203484	-0.426215	-0.410654	0.897659	0.0120094	0.999831	0.999319	0.999822	0.999689	0.941744	0.91641	0.545571	0.106779	0.00827953	0.666578	0.167265	0.216495	0.00658035	-0.899974	0.087307	0.423096	-0.0178385	0.418049	0.36617	0.0648355	0.311061	0.3247	0.163538	0.153574	0.249115
Q81EY6		+							+	+	+	-0.246582	-3.11401	-0.174124	-0.24987	-0.296746	-0.0958068	-0.242533	-0.408944	-1.63714	-1.79072	-1.91951	0.314784	1.06e-11	0.999831	0.999319	0.999822	0.999689	0.711793	0.542832	3.58e-05	9.17e-06	4.49e-07	-0.519129	-1.73775	-1.4557	-4.2322	-4.22352	-4.5715	-0.454535	-0.819627	-0.763784	-0.794673	-0.872529	-0.856553	-0.927653	-0.925667	-1.09076	-1.02875
Q81B33									+	+	+	-0.410411	0.296204	-0.15012	-0.170299	-0.205365	-0.0957788	-0.0718733	-0.302686	-2.30385	-2.30559	-2.52683	0.451658	0.623744	0.999831	0.999319	0.999822	0.999689	0.971684	0.872423	0.000142791	0.00013151	1.11e-05	-2.68303	-1.88806	-1.73465	-1.31157	-2.268	-1.31869	-1.50904	-1.46495	-1.16562	-1.57396	-1.47915	-1.5003	-1.66435	-1.76113	-1.38156	-1.52871
Q817W7												-0.605167	1.03374	0.173731	0.150454	0.0433445	-0.0949395	-0.0231374	0.0220318	0.087937	-0.409142	0.413546	0.180775	0.258722	0.999831	0.999319	0.999822	0.999689	0.981289	0.956373	0.745279	0.456688	0.614998	-0.89851	1.53856	1.52824	2.43733	2.20251	1.73282	1.65527	1.37603	1.8874	1.9197	1.82109	1.73565	1.67306	1.41537	2.1251	1.58449
Q815Z2										+	+	0.270107	-0.630974	-0.170539	-0.0571988	-0.0746899	-0.0947304	0.0485096	0.0431805	0.91631	1.5502	1.48314	0.906199	3.3e-10	0.999831	0.999319	0.999822	0.999689	0.985985	0.655188	2.15e-08	9.6e-13	7.01e-11	3.38869	3.46119	3.45014	2.57141	2.22933	2.08367	3.44669	3.50192	3.47598	3.25668	3.38344	3.30942	3.3334	3.33796	3.42511	3.29563
Q81B65		+								+	+	1.13516	-2.91967	-0.0012881	0.0217393	-0.193916	-0.0942663	-0.288911	-0.755093	-0.936615	-1.6361	-3.06889	0.452212	1.67e-06	0.999831	0.999319	0.999822	0.999689	0.88073	0.482749	0.153075	0.0117331	5.81e-06	1.97689	1.54089	1.24695	-1.91105	-1.76645	-4.43459	0.694143	0.972781	0.627232	0.46803	0.956162	0.902661	0.153926	1.14802	0.900908	0.246037
Q81EQ2									+	+	+	0.723374	-0.691962	0.081159	0.286403	0.324616	-0.0939617	-0.644194	0.265285	1.40644	1.46582	1.92873	0.750115	0.0352193	0.999831	0.999319	0.999822	0.999689	0.595738	0.833391	0.0162828	0.0117331	0.00498919	-2.50555	-1.21494	-2.66587	-3.68864	-3.61767	-4.03841	-3.48185	-2.41878	-1.72095	-2.69505	-2.08827	-2.55822	-2.96478	-1.86301	-2.09112	-1.99417
Q81G13		+							+	+	+	-0.21237	-3.00258	-0.0471255	0.0245374	-0.0494048	-0.0939376	-0.0545775	-0.0641333	-1.5851	-1.6976	-1.21073	0.128521	8.2e-15	0.999831	0.999319	0.999822	0.999689	0.915364	0.998719	1.97e-07	5.09e-08	6.97e-07	3.15766	3.5122	3.35151	0.851824	-0.0250597	0.111635	4.02226	3.72477	3.84636	3.89549	3.64721	3.94588	4.03825	3.78076	3.69147	3.89895
Q819M9		+									+	0.0764764	-1.68388	-0.0517565	-0.0125147	-0.0751801	-0.0925287	0.0266959	0.277493	0.744504	0.878478	1.0165	0.210119	2.77e-16	0.999831	0.999319	0.999822	0.999689	0.971684	0.0232243	1.84e-07	7.64e-09	8.91e-08	3.23973	2.96784	2.86965	1.06381	1.04808	0.971907	3.24272	3.24857	3.2914	3.17837	3.2421	3.2435	3.24808	3.13983	3.2007	3.24312
Q814S6		+							+	+		0.197185	-2.72737	-0.0406488	0.0153643	-0.189395	-0.092528	-0.0786076	-0.289909	-1.62389	-1.68569	0.531565	0.794971	2.4e-15	0.999831	0.999319	0.999822	0.999689	0.822994	0.477015	1.38e-08	4.43e-09	0.0746157	1.76773	1.64081	1.53828	-1.10714	-1.60882	-1.82325	1.75447	1.86203	1.67366	1.67578	1.81467	1.71432	1.72466	1.77215	1.68291	1.68193
Q814C3												0.345798	0.19321	-0.030049	0.0674451	-0.0550327	-0.0920461	0.116898	0.0188446	0.637092	0.588717	0.313801	0.948526	0.0346616	0.999831	0.999319	0.999822	0.999689	0.941744	0.858932	0.000203405	0.000328761	0.446967	2.71655	2.92248	2.83973	2.27877	2.1606	2.86928	2.77132	2.65516	2.94978	2.72252	2.77623	2.82393	2.89288	2.70105	2.82815	2.85007
Q818T0		+							+	+	+	0.590973	-2.27069	-0.0890865	-0.0405064	0.0634791	-0.0917568	-0.813412	0.285304	2.0542	2.35147	2.68955	0.746024	6.13e-08	0.999831	0.999319	0.999822	0.999689	0.209651	0.639579	8.87e-06	9.08e-07	5.75e-07	-0.4128	-0.880539	-0.620618	-3.50686	-4.78996	-2.91447	-0.9653	-1.03077	-0.755913	-1.17931	-0.916305	-0.887065	-1.27829	-1.14985	-0.601892	-0.993151
Q818I0		+										0.322891	1.79912	0.154957	-0.227264	-0.0257696	-0.0913194	0.0196253	-0.42778	-0.80081	-0.652837	-0.283029	0.997984	0.00154175	0.999831	0.999319	0.999822	0.999689	0.985985	0.606128	0.0559828	0.130436	0.230463	-1.91488	-1.99183	-1.4762	-0.741776	-0.781995	-0.142824	-2.33867	-1.80981	-1.26821	-1.75351	-1.651	-1.51075	-2.49323	-1.92634	-1.83544	-2.17335
Q81IJ0									+	+	+	0.10012	-0.292089	0.00608572	-0.0381158	-0.00699488	-0.0906709	-0.0472031	-0.108613	-2.54932	-3.46852	-3.69598	0.702633	0.00204105	0.999831	0.999319	0.999822	0.999689	0.933145	0.958782	7.07e-10	1.03e-12	5.77e-14	1.10152	0.650839	0.644771	0.550167	-0.286571	0.244549	1.01469	0.848006	1.16896	1.03182	1.01114	1.04352	1.18206	0.702236	0.876492	1.09673
Q81I15		+						+	+	+	+	0.0379289	-2.56214	0.00917626	-0.149025	-0.118136	-0.0903352	-0.392558	-1.08529	-1.6837	-2.6401	-2.35543	0.738566	4.17e-09	0.999831	0.999319	0.999822	0.999689	0.595122	0.0341426	0.000143228	1.63e-07	2.08e-07	-1.31948	-1.41799	-1.47314	-4.17701	-4.44244	-4.10374	-1.12672	-0.999236	-1.26354	-1.20976	-0.74055	-1.3751	-1.40106	-1.54686	-1.04518	-1.43605
Q81C17									+	+	+	0.0158304	-0.324954	-0.100903	-0.0282396	-0.0778249	-0.0902551	0.0133966	-0.412994	-2.57914	-3.75674	-4.38169	0.645046	0.00477132	0.999831	0.999319	0.999822	0.999689	0.984135	0.48358	7.85e-09	3.14e-12	3.87e-14	0.98279	1.4613	1.25086	1.06144	0.0267229	0.87208	1.72885	1.55602	1.29749	1.50264	1.56481	1.24875	1.58427	1.37119	1.38565	1.49386
Q818S6									+	+	+	0.336857	1.1706	0.0426381	0.0278721	0.151541	-0.0901248	-0.321818	-0.553473	-2.85852	-1.8955	-2.03863	0.996339	0.287765	0.999831	0.999319	0.999822	0.999689	0.855715	0.685405	5.1e-05	0.00382029	0.00064437	-1.16849	-0.0876102	0.010848	-0.253462	0.255754	0.541325	-0.287056	-0.526406	-0.507462	-0.520154	-0.392404	-0.24389	-0.412631	-0.782328	-0.198874	-0.313574
Q81DZ6		+										0.302177	-1.51488	0.0246582	-0.14914	-0.324036	-0.0889664	-0.324837	-0.207473	0.507942	0.590738	0.204405	0.997984	4.49e-05	0.999831	0.999319	0.999822	0.999689	0.762488	0.920088	0.210935	0.139211	0.961129	0.112221	0.105883	0.0905123	-0.311922	-2.87285	-2.67015	0.398367	-0.224082	0.162695	0.441777	-0.0259848	0.031724	0.327416	-0.491514	-0.102867	0.154615
Q81CE5									+	+	+	0.313244	-0.568712	-0.0557563	-0.0496813	-0.0414155	-0.0885569	0.258505	0.548239	1.18231	1.16169	1.2619	0.997984	5.09e-08	0.999831	0.999319	0.999822	0.999689	0.550672	0.00191713	1.49e-08	9.95e-09	1.19e-07	2.27542	2.72489	2.74037	1.69175	1.26079	1.42991	2.45784	2.61352	2.66448	2.40673	2.55747	2.64093	2.38856	2.52691	2.5148	2.48933
Q815Z3		+								+		0.177318	-2.38025	-0.164761	-0.0370331	-0.105975	-0.0884342	-0.0907745	-0.18975	0.339926	1.2415	0.639583	0.695964	7.93e-16	0.999831	0.999319	0.999822	0.999689	0.719083	0.714617	0.0159719	7.33e-09	0.00694354	1.95901	2.20724	2.10902	-0.37863	-0.649648	-1.08153	2.13815	2.18289	2.35717	2.05968	2.09004	2.07078	2.17118	2.2043	2.03511	2.1558
Q81A53	+	+										-1.34519	-2.81336	0.00793966	0.0804087	-0.128773	-0.0879364	-0.287849	-0.180059	-0.206263	-0.150394	-0.859862	0.000234435	3.03e-12	0.999831	0.999319	0.999822	0.999689	0.589378	0.889185	0.644424	0.813491	0.000685981	-1.75608	-2.43588	-2.54251	-3.58015	-4.07313	-4.19806	-0.531839	-0.596528	-0.635639	-0.664117	-0.512197	-0.527312	-0.286006	-0.62933	-0.763969	-0.474152
Q81G14										+	+	-0.926057	-0.550853	0.18119	0.20292	-0.0362015	-0.0878658	0.7934	0.426404	-1.4138	-2.57343	-2.54501	0.268082	0.0991452	0.999831	0.999319	0.999822	0.999689	0.630647	0.743531	0.0517561	0.000697961	0.000291448	-3.60933	-1.47122	-1.73519	-1.90104	-0.543241	-3.95821	-0.980284	-1.44591	-0.676489	-0.584083	-0.794827	-1.14364	-0.798512	-0.620636	-1.23129	-1.54703
Q81B34		+							+	+		-1.80397	-3.93954	0.207552	0.13908	0.265475	-0.0877018	-0.250725	-0.425299	-3.8566	-3.5441	-0.951726	0.217411	0.00014701	0.999831	0.999319	0.999822	0.999689	0.965656	0.915956	0.00111929	0.00239603	0.30872	-0.0962753	0.512701	-4.42943	-3.69684	-4.47013	-2.96512	0.483128	0.599986	1.25068	1.06079	0.881623	1.0506	0.725375	0.679132	1.19	1.16516
Q81GF7		+										0.49219	-1.05283	-0.128263	-0.00705338	-0.223319	-0.0874939	-0.329245	-0.747554	-0.546666	-0.148591	-0.0977961	0.763472	1.95e-06	0.999831	0.999319	0.999822	0.999689	0.506955	0.0590568	0.0906058	0.815746	0.335301	1.26365	1.05505	0.876351	-1.00486	-1.38013	0.232634	0.997631	0.737248	0.918495	0.785617	0.979096	0.540433	0.96281	0.807953	0.704927	0.829933
Q81A22											+	0.405047	-0.508502	-0.0592194	-0.139554	-0.143492	-0.0862713	0.0417322	-0.00214577	0.354634	0.766213	1.43624	0.83495	2.62e-06	0.999831	0.999319	0.999822	0.999689	0.985985	0.91641	0.0289102	7.11e-05	2.21e-07	2.0653	1.96786	1.6567	0.497816	0.784005	0.955036	2.05037	1.52705	1.83218	1.92732	1.65734	1.68385	1.78834	1.42003	1.62605	1.83377
Q819V0		+										0.409238	1.39928	-0.0257676	-0.0440013	0.00365384	-0.0861041	-0.0115064	-0.0869344	0.103682	0.412467	0.464309	0.815652	2.85e-05	0.999831	0.999319	0.999822	0.999689	0.934355	0.974116	0.355726	0.00834688	0.11884	0.490158	0.644035	0.592063	1.51849	0.910151	1.55538	0.725147	0.313489	0.3948	0.417489	0.545056	0.43015	0.472203	0.322567	0.350138	0.448792
Q819C2										+	+	0.508144	-0.263699	-0.0881767	0.0409025	-0.0892639	-0.0857493	-0.300767	-0.796605	-0.893317	-1.29854	-1.75406	0.729736	0.00280164	0.999831	0.999319	0.999822	0.999689	0.511199	0.0289605	0.00303901	4.67e-05	4.39e-08	0.92157	1.01578	1.15703	0.787029	-0.52704	-0.193497	0.734221	0.647235	1.12339	0.805406	0.811355	0.660113	0.714408	0.855934	0.900682	0.577385
Q81DH7									+			0.242703	-0.439826	-0.0394739	0.0520013	-0.0654958	-0.0856495	0.0179208	-0.240451	-1.08319	-0.715734	-0.326187	0.923837	9.33e-05	0.999831	0.999319	0.999822	0.999689	0.981289	0.713437	9.15e-05	0.00732845	0.0311233	2.17752	1.72931	1.79122	1.7625	0.589763	0.58584	1.90519	1.86295	2.1367	2.0547	1.90027	1.86801	2.09803	1.81273	1.99355	2.08835
Q81AP9										+		-0.816802	-0.683512	-0.559525	-0.289941	-0.0582867	-0.0853411	-0.767319	-0.57334	-1.35275	-2.60241	-1.48688	0.57392	0.195334	0.999831	0.999319	0.999822	0.999689	0.762488	0.848356	0.194698	0.0119261	0.093159	-2.15487	-2.07988	-6.56381	-4.74053	-2.56608	-3.80443	-2.62787	-3.06712	-1.71826	-3.33013	-2.51652	-3.20862	-1.66318	-4.18563	-2.59079	-1.83801
Q81GJ5		+							+	+	+	-0.6333	-2.87411	-0.619564	-0.235147	0.0474459	-0.084362	-0.408305	-0.530445	-4.06194	-4.29738	-4.73322	0.648272	0.000935968	0.999831	0.999319	0.999822	0.999689	0.920629	0.865696	0.000247905	0.000118566	1.77e-05	-1.07515	-0.0557594	-0.0651827	0.514791	-4.676	-4.46967	0.11618	0.973804	0.548717	-0.489459	0.0188379	0.287192	0.767583	-0.187416	0.196569	0.611193
Q813Z9									+	+	+	-0.0537682	-0.333058	-0.0915985	0.183365	0.502062	-0.0833874	-0.724323	0.65388	1.46565	1.02894	1.3091	0.741807	0.0772544	0.999831	0.999319	0.999822	0.999689	0.437894	0.357999	0.00425063	0.0329617	0.0302622	-3.41346	-2.39116	-2.13088	-3.52902	-4.03237	-1.92434	-2.51432	-2.06449	-2.26049	-2.39848	-2.49124	-2.18781	-2.80056	-2.13182	-1.51334	-1.60511
Q81A24									+	+	+	0.131991	0.45192	0.00484975	-0.122406	-0.0901286	-0.0813917	-0.315264	-0.676935	-2.28594	-3.17224	-2.88782	0.707537	0.668312	0.999831	0.999319	0.999822	0.999689	0.40092	0.0372167	5.17e-10	5.65e-13	4.55e-13	4.42142	5.18215	5.17246	5.05045	4.82946	5.14356	5.06392	5.25415	4.99689	4.90907	5.25213	5.20487	4.68967	4.85867	5.24288	4.87068
Q81HA9								+	+	+	+	0.21084	0.621193	-0.285561	0.551083	0.617791	-0.0807823	-0.350282	4.13648	5.9785	3.89253	3.13533	0.966956	0.91717	0.999831	0.999319	0.999822	0.999689	0.872215	5.6e-06	2.1e-09	1.75e-06	0.000109608	-4.45602	-4.36208	-5.71598	-4.2824	-4.56618	-5.16679	-4.75599	-4.62174	-4.85398	-4.66138	-5.23149	-5.15896	-4.51461	-2.96573	-5.25464	-2.23319
Q814W8									+	+	+	0.435015	-0.775952	0.216492	0.00345993	-0.139354	-0.0804698	-0.0591437	-0.198114	-3.08181	-2.85318	-3.02788	0.939319	0.0115099	0.999831	0.999319	0.999822	0.999689	0.974709	0.943461	2.54e-06	6.79e-06	8.12e-07	-0.966084	-1.30334	-1.11541	-1.88917	-2.09903	-3.7419	-1.13802	-1.53342	-1.08355	-1.2236	-0.998591	-0.846761	-0.978356	-1.32729	-1.59549	-1.07892
Q81AF6									+	+	+	-0.00812721	-0.719939	-0.143358	-0.114944	-0.0783164	-0.0802275	0.0614484	-0.0760231	1.01988	1.81435	3.02677	0.200107	7.52e-09	0.999831	0.999319	0.999822	0.999689	0.992766	0.990367	1.89e-07	4.95e-12	1.23e-15	3.6543	3.22282	3.15555	2.56858	2.49339	2.12291	3.60665	3.5859	3.7994	3.49331	3.47969	3.62544	3.62398	3.47066	3.39594	3.48769
Q81EE4									+	+	+	0.753935	1.32336	-0.297426	-0.142286	-0.227667	-0.080087	-0.276514	-0.563454	-1.33956	-1.3822	-1.34287	0.635418	0.0772539	0.999831	0.999319	0.999822	0.999689	0.810331	0.501347	0.00644854	0.00512195	0.00143666	0.996429	-0.0589619	-0.207576	0.736437	0.401971	0.5874	-0.159582	-0.300046	-0.137392	-0.263934	-0.438968	-0.749835	-0.300635	-0.405405	-0.474363	-0.478765
Q817B2		+							+	+		0.108707	-2.94367	0.0222905	0.0710017	-0.242172	-0.0796528	0.0786177	-0.0553799	-2.37689	-2.97138	-0.834187	0.746024	2.31e-12	0.999831	0.999319	0.999822	0.999689	0.985985	0.993863	1.52e-08	1.47e-10	0.00110464	1.65589	1.18247	1.11718	-1.92844	-2.37032	-1.61519	1.68247	1.49389	1.38796	1.69059	1.39315	1.58401	1.93402	1.31225	1.37454	1.84941
Q81EN3		+										-0.286001	-1.47056	-0.0194378	-0.0438099	-0.00850614	-0.0793896	0.238842	0.591068	0.430848	0.39271	0.943703	0.0325077	1.69e-11	0.999831	0.999319	0.999822	0.999689	0.684633	0.00478092	0.00977711	0.0134505	0.000199849	-2.60072	-2.86756	-2.28764	-4.32567	-3.96545	-3.73084	-1.98504	-2.03688	-1.9411	-2.12851	-1.97859	-1.87768	-2.022	-2.22553	-2.00345	-2.01263
Q812W5									+			1.02062	1.55042	-0.177088	-0.096831	-0.417115	-0.0793692	-0.0123863	0.209873	1.60533	1.3976	1.40067	0.648869	0.167717	0.999831	0.999319	0.999822	0.999689	0.985985	0.902074	0.0280503	0.0500877	0.106342	-0.584183	-0.879015	-1.25484	1.52007	-3.76616	0.405096	-1.5429	-1.66109	-1.64102	-1.75489	-1.87803	-1.70679	-1.67058	-1.65813	-1.9633	-1.96836
Q81DX6		+							+			0.221214	-1.63874	-0.0689322	-0.0507189	-0.0791569	-0.0784429	-0.135104	-0.41102	-1.03026	-0.725388	-0.613825	0.810298	2.48e-13	0.999831	0.999319	0.999822	0.999689	0.595122	0.113288	1.73e-06	0.000276193	2.41e-05	2.85243	3.08982	3.07194	1.25467	0.892037	0.575266	2.95255	3.07977	3.25313	2.97946	3.04244	3.09331	2.95795	3.00072	3.01809	2.93305
Q814N7										+	+	0.349052	-0.904221	0.0375792	0.0859648	-0.127017	-0.0773964	-0.135648	0.0730832	0.788677	1.21309	1.61358	0.949696	1.53e-08	0.999831	0.999319	0.999822	0.999689	0.664999	0.740239	7.52e-05	1.51e-07	2.57e-08	1.80035	1.4989	1.24217	0.136393	-0.253167	0.186029	1.67499	1.55246	1.20172	1.49691	1.55464	1.52692	1.60097	1.4858	1.44377	1.52547
Q819K6		+							+	+		0.218203	-1.5008	-0.133333	0.0201664	-0.0836811	-0.0768719	-0.192844	0.0832106	1.44943	1.29026	0.559718	0.806239	1.21e-12	0.999831	0.999319	0.999822	0.999689	0.448134	0.628596	1.09e-09	4.21e-09	0.0243908	4.74791	5.37179	5.33158	3.1474	3.37231	3.06219	5.13628	5.23296	5.36232	5.08992	5.13281	5.14539	5.10906	5.28143	5.24505	5.10188
Q819D7		+										0.395203	-1.49654	-0.174685	-0.0622171	-0.206741	-0.0752481	-0.0790704	-0.0925624	0.596429	0.646947	0.417145	0.839792	4.96e-12	0.999831	0.999319	0.999822	0.999689	0.79549	0.958782	0.000564807	0.000197448	0.183982	3.50241	3.23746	3.23208	1.32417	1.03969	1.2205	3.08365	3.37675	3.26083	2.99763	3.10827	3.12784	2.94972	3.23715	3.19119	3.04408
Q81GR4									+	+	+	0.376418	0.279875	-0.186763	0.104873	-0.0719026	-0.0742397	-0.423521	-0.526822	-2.81606	-3.07598	-3.02255	0.979294	0.596987	0.999831	0.999319	0.999822	0.999689	0.71049	0.630898	9.19e-06	2e-06	7.74e-07	-0.448465	-0.163679	-0.119237	-0.543592	-0.419765	-0.77001	-0.451502	0.0794725	-0.553713	-0.493772	-0.357097	-0.598601	-0.168633	-0.322374	-0.27664	-0.305235
Q81I99									+	+	+	0.381537	-0.309181	-0.0593561	0.201459	-0.20553	-0.0731614	-0.50575	-0.861346	-2.74699	-2.90148	-2.98276	0.98658	0.208384	0.999831	0.999319	0.999822	0.999689	0.776876	0.488993	0.000458996	0.000237744	6.6e-05	-1.60622	-0.573677	-1.04998	-0.467964	-4.6146	-0.93182	-1.02789	-1.08777	-1.32394	-1.30388	-1.14479	-1.13244	-0.919932	-1.2045	-0.86731	-0.916916
Q81IT5		+							+	+	+	0.222457	-2.51871	-0.160805	0.0380249	0.0343278	-0.0728003	-0.310141	-0.706172	-2.60956	-3.42649	-3.84211	0.890434	1.07e-12	0.999831	0.999319	0.999822	0.999689	0.457034	0.0397743	1.19e-10	3.99e-13	6.93e-15	4.16419	4.17112	3.89904	1.26579	0.347009	1.68571	4.34082	4.11237	4.04869	4.25068	3.98376	3.82159	4.06258	4.16584	4.23101	4.08084
Q81J28												-0.0729415	-0.843863	-0.0311629	0.0360654	-0.0880419	-0.0721931	0.476397	0.557175	0.98375	0.606147	0.783457	0.14695	4.78e-09	0.999831	0.999319	0.999822	0.999689	0.125352	0.00383351	9.82e-07	0.000260699	0.000982483	3.16805	3.10751	2.98212	2.24671	2.25402	1.73182	3.43991	3.54773	3.42375	3.30644	3.55262	3.4954	3.36969	3.42865	3.56472	3.27116
Q81IT3												0.566837	-0.127927	-0.150945	0.00308291	-0.150473	-0.0713813	-0.344574	-0.508517	-0.144323	-0.202104	0.188851	0.620241	0.00676734	0.999831	0.999319	0.999822	0.999689	0.390607	0.199776	0.771011	0.621314	0.973208	1.11695	0.554655	0.553304	-0.212387	-0.669147	0.309792	0.254093	0.60175	0.603445	0.212897	0.421626	0.408492	0.291825	0.457842	0.562346	0.0507469
Q81J50									+	+	+	0.44046	-0.630583	-0.305781	-0.030817	-0.00969251	-0.0712573	0.314161	0.714417	1.4427	1.10529	1.28735	0.794369	4.4e-06	0.999831	0.999319	0.999822	0.999689	0.595738	0.00440408	1.45e-07	5.08e-06	1.4e-05	4.64177	5.11271	5.24905	3.86727	3.54174	3.66903	4.81514	5.04806	4.75385	4.47369	4.69189	4.57068	4.60797	4.88731	4.87278	4.75521
Q816E1												0.202921	-0.771403	0.0974089	-0.163223	-0.0214189	-0.0702082	0.202791	0.0957546	-0.441378	-0.0958773	0.561789	0.923837	0.000509427	0.999831	0.999319	0.999946	0.999689	0.931412	0.873254	0.304235	0.960645	0.294762	-1.20873	-1.90498	-1.77045	-2.88128	-2.00289	-3.63531	-1.49751	-1.51793	-1.54259	-1.4557	-1.41328	-1.36026	-1.45211	-1.77567	-1.97644	-1.35275
Q81GK2		+							+			0.160418	-1.14485	-0.0252349	-0.0497564	-0.139111	-0.069039	-0.17627	-0.612974	-1.10359	-0.454437	-0.192488	0.695607	4.47e-10	0.999831	0.999319	0.999822	0.999689	0.560884	0.0178648	3.67e-06	0.0433963	0.0476335	3.70765	3.6871	3.74306	2.38184	1.67726	2.45056	3.8326	3.88995	3.8689	3.66722	3.91803	3.96706	3.64475	3.76391	3.877	3.61866
Q81B23									+	+	+	0.240413	-0.782347	-0.0414263	-0.0627143	-0.116963	-0.0689634	-0.220167	-0.765325	-1.06536	-1.55898	-1.06516	0.925648	5.4e-06	0.999831	0.999319	0.999822	0.999689	0.617831	0.0272549	0.00029569	1.37e-06	1.82e-05	0.223175	0.360386	0.219432	-0.251661	-1.80622	-0.919765	0.229115	0.443759	0.343775	0.341746	0.238015	0.34917	0.323655	0.11083	0.237495	0.124008
Q81GI1		+							+	+	+	-0.543189	-3.03294	0.0617174	-0.0610243	0.0453885	-0.0686989	-0.453023	-0.661613	-2.55821	-3.28338	-5.07495	0.178889	1.08e-09	0.999831	0.999319	0.999822	0.999689	0.566682	0.333459	1.03e-06	1.09e-08	8.18e-13	5.12365	5.94713	6.01564	4.26144	2.92	1.72336	6.75373	6.5813	6.31585	6.77348	6.70497	6.39414	6.37802	6.24718	6.68607	6.51086
Q812Q9									+	+	+	0.38284	-0.259377	-0.0927334	0.0293566	-0.0903015	-0.0670827	0.237246	0.42426	1.14036	1.09176	1.50982	0.840259	5.05e-06	0.999831	0.999319	0.999822	0.999689	0.595122	0.00980062	1.43e-08	1.47e-08	1.52e-09	4.54815	4.49146	4.52689	3.78054	3.81899	3.32797	4.51567	4.47407	4.36313	4.27644	4.49005	4.34475	4.39772	4.43504	4.45167	4.25792
Q817Z0												0.49029	-0.314265	0.0538362	-0.046196	-0.19614	-0.0663261	-0.0255941	-0.0626214	0.706294	0.62446	0.513824	0.56746	2.4e-06	0.999831	0.999319	0.999822	0.999689	0.897403	0.998719	1.78e-05	5.17e-05	0.0324488	2.70951	2.71996	2.60901	1.69076	1.97115	1.25055	2.56465	2.5338	2.40407	2.44158	2.63985	2.61915	2.39236	2.35175	2.4633	2.34624
Q81F28									+	+		-0.322401	-0.664705	0.0588684	0.0968685	-0.136619	-0.0660534	-0.857525	0.111909	-2.40449	-2.38764	0.112654	0.648272	0.0613533	0.999831	0.999319	0.999822	0.999689	0.506955	0.941172	0.00102036	0.00108349	0.927036	-2.96804	-1.41152	-1.85504	-1.9311	-4.21003	-1.83275	-1.37676	-1.26634	-1.68941	-1.4863	-1.34234	-1.2907	-1.14339	-1.50889	-1.54615	-1.79598
Q81DT7		+						+	+	+	+	-0.236571	-3.7764	-0.169631	-0.307049	-0.62229	-0.0647462	-0.358349	-1.06676	-2.55571	-3.30206	-3.98328	0.343829	8.67e-13	0.999831	0.999319	0.999822	0.999689	0.589378	0.0203163	6.38e-08	4.12e-10	2.55e-12	3.02465	3.0542	2.946	-0.329552	-1.58907	-0.388376	3.75311	3.2687	3.64764	3.76832	3.26121	3.16759	3.60421	3.25518	2.7324	3.462
Q81B06									+	+	+	0.337191	-0.298889	0.0834185	0.0141551	0.0837199	-0.0645911	-0.049008	-0.836848	-1.04491	-1.34552	-2.30596	0.989501	0.00399031	0.999831	0.999319	0.999822	0.999689	0.938357	0.0348477	0.00148891	8.61e-05	2.23e-09	3.39979	3.64058	3.54044	2.11992	3.36403	2.47627	3.91995	3.23868	3.34551	3.41407	3.71571	3.66118	3.24104	3.45941	3.68964	3.55535
Q81D14		+							+	+	+	0.413914	-3.79165	-0.057574	-0.0376205	-0.0252101	-0.0642586	-0.363555	-0.900672	-2.56496	-3.41896	-4.45126	0.829888	2.5e-17	0.999831	0.999319	0.999822	0.999689	0.244592	0.00109489	4.64e-12	1.07e-14	8.4e-18	1.59215	2.02366	1.72627	-3.08337	-2.55468	-2.34893	1.93726	1.35808	1.7399	1.50442	1.63087	1.76378	1.41666	1.63325	1.71593	1.9105
Q814C5												0.166815	-0.620345	0.0107899	-0.00988515	-0.0700162	-0.0631727	-0.0228717	0.255393	0.995241	0.515843	0.198744	0.686797	1.15e-07	0.999831	0.999319	0.999822	0.999689	0.920629	0.181741	8.87e-07	0.00118144	0.920937	5.86922	6.40296	6.27359	4.98595	5.24665	5.23934	6.33305	6.35132	6.29585	6.17927	6.45022	6.41967	6.12897	6.22984	6.43524	6.2222
Q81G39												0.292113	-0.972153	0.0045859	-0.0553614	-0.19732	-0.062657	0.177066	0.185491	0.603984	0.687346	0.55241	0.990865	4.21e-07	0.999831	0.999319	0.999822	0.999689	0.915364	0.55367	0.00775485	0.00263391	0.128814	1.43262	1.72674	1.2396	0.0719872	-0.735852	0.557665	1.50685	1.48813	1.46253	1.65732	1.37859	1.47193	1.58915	1.22711	1.31864	1.4574
Q817P4		+										0.908061	-2.17294	0.0546862	0.0131442	-0.249054	-0.0620956	-0.286271	-0.646784	-0.268714	-0.198198	-0.407747	0.327139	2.12e-08	0.999831	0.999319	0.999822	0.999689	0.699498	0.279018	0.601728	0.752844	0.110699	0.282593	-0.17099	-0.246181	-2.02008	-4.09217	-3.9777	-0.693287	-0.673028	-0.557552	-0.492255	-0.571445	-0.659547	-0.798604	-0.695736	-0.546619	-0.93886
Q81I38		+								+	+	0.137107	-1.90496	-0.132704	-0.0267372	-0.104351	-0.0619888	-0.0246092	-0.114834	0.468289	1.01965	1.10552	0.853244	5.14e-07	0.999831	0.999319	0.999822	0.999689	0.981289	0.973532	0.182542	0.00734121	0.0225401	0.0265274	0.194109	0.0962152	-1.51224	-3.86041	-1.14905	0.220055	0.410113	0.210257	0.145856	0.16484	0.16818	0.162606	0.177862	0.26322	0.150719
Q819K5		+										0.161101	-2.4812	-0.0834382	-0.0715669	-0.171788	-0.0611941	-0.176729	-0.0187772	0.959121	0.829994	0.578242	0.660054	5.44e-16	0.999831	0.999319	0.999822	0.999689	0.496736	0.941172	9.56e-07	4.79e-06	0.0199041	4.81047	4.40497	4.52411	1.61675	2.00322	1.48032	4.74964	4.70418	4.73732	4.57987	4.67671	4.7208	4.55316	4.52342	4.74333	4.57678
Q81J23									+			-0.251705	0.414531	-0.112058	0.119059	-0.034441	-0.0610669	0.507228	0.649682	1.0576	0.646088	0.653083	0.030599	0.426511	0.999831	0.999319	0.999822	0.999689	0.0932431	0.00115627	4.02e-07	0.00015766	0.00831154	2.81172	2.91175	3.08785	3.47587	3.17483	3.44696	3.34398	3.47172	3.68562	3.41381	3.46882	3.31908	3.48114	3.54899	3.67185	3.43959
Q81GZ8		+							+	+	+	0.396236	-3.30646	0.0777734	0.0434971	-0.0236613	-0.0601819	-0.369118	-0.797401	-2.31185	-3.15746	-5.34897	0.939319	5.8e-12	0.999831	0.999319	0.999822	0.999689	0.560884	0.100411	2.45e-07	6.64e-10	6.5e-15	2.73632	3.07654	2.89668	-1.5377	-1.06901	-0.504194	2.88988	2.87401	2.69184	2.8732	2.92086	2.93154	2.71347	2.93307	2.78315	3.03159
Q817C9								+	+	+	+	-0.118672	-1.32002	0.027799	0.202857	-0.250624	-0.0600548	-1.80296	-3.75386	-3.06726	-4.59275	-2.24217	0.873512	0.0760821	0.999831	0.999319	0.999822	0.999689	0.357521	0.00626738	0.00743483	0.000153721	0.0278507	-2.48105	0.510044	0.887647	-0.684614	-2.9105	-1.80465	-0.241978	0.277175	0.172358	0.18978	0.137328	0.000405312	-0.123746	0.252907	0.530439	-0.468914
Q817F1		+										0.607557	-2.66627	0.24644	0.0663865	-0.20782	-0.0598055	-0.19047	0.0746199	0.831504	0.820664	0.698613	0.691144	5.69e-10	0.999831	0.999319	0.999822	0.999689	0.822994	0.894085	0.0137755	0.0132944	0.147962	0.152954	-0.393152	-0.289104	-3.31144	-4.20695	-3.54475	0.114122	-0.858455	-0.672747	0.00612163	-0.470656	-0.176663	0.0438318	-0.812855	-0.605421	-0.110815
Q819Z1												0.264467	-0.197704	-0.0392965	-0.0534871	-0.12653	-0.0595436	-0.272978	-0.305723	-0.0523688	-0.34678	-0.337195	0.904044	5.56e-06	0.999831	0.999319	0.999822	0.999689	0.147118	0.231355	0.928032	0.0583581	0.000669697	3.76921	4.12708	4.19717	3.21066	3.36053	3.42341	4.00899	4.12677	4.0992	4.01277	4.11015	4.03071	3.81781	3.98374	4.11643	3.87802
Q816H9												0.0752996	-0.0496515	-0.0773875	-0.0366828	-0.0546678	-0.0594851	0.00520706	-0.286057	0.438113	0.439512	0.381617	0.327139	0.000127755	0.999831	0.999319	0.999822	0.999689	0.939962	0.299821	0.00101743	0.000752167	0.162929	1.63694	2.24809	2.15032	1.68709	1.57731	1.68374	2.13301	2.2564	2.35492	2.09871	2.28348	2.16655	2.07771	2.23822	2.16183	2.13927
Q81IK3		+										-0.182886	-3.5622	-0.0735105	0.0857302	0.0518506	-0.0585639	0.0306435	0.179629	0.0698179	-0.121482	-0.87212	0.0810973	2.5e-17	0.999831	0.999319	0.999822	0.999689	0.984135	0.415474	0.490655	0.832468	3.82e-06	0.219362	0.259756	0.337853	-2.7767	-3.73593	-3.52069	0.704182	0.658555	0.937788	0.694724	0.68127	0.740561	0.854918	0.776684	0.769588	0.819614
Q815K6		+										0.383682	-1.62193	0.00496228	0.0214926	-0.0509822	-0.0576693	-0.112922	0.0397949	0.492615	0.248786	0.352257	0.899151	3.56e-11	0.999831	0.999319	0.999822	0.999689	0.775241	0.855621	0.00944338	0.115851	0.421508	5.58772	5.93185	6.00146	3.56461	3.52511	3.70211	5.87085	5.75477	5.67926	5.54023	5.95638	5.85973	5.49095	5.72728	5.9946	5.68044
Q81FR4		+										0.402163	-1.9991	0.00401242	-0.083758	-0.242194	-0.0574195	-0.0241407	-0.14893	-0.560249	-0.873615	-1.00762	0.974758	0.000431052	0.999831	0.999319	0.999822	0.999689	0.985985	0.974116	0.487239	0.242181	0.0852412	1.79714	1.20092	1.0618	-3.78251	1.27154	-1.3453	1.4122	1.1833	1.19278	1.22385	1.2871	1.32593	1.15522	0.974609	1.25065	1.2254
Q813A5		+										0.510003	-2.14613	-0.121494	-0.1325	0.0217285	-0.0569439	-0.426079	-0.462453	-0.299614	-0.175384	-0.598663	0.847959	5.46e-07	0.999831	0.999319	0.999822	0.999689	0.617831	0.628596	0.616261	0.838031	0.0792141	-1.55496	-0.720974	-0.400802	-4.16514	-3.7281	-3.46426	-1.53504	-0.76917	-0.967636	-1.87429	-0.748437	-0.97704	-1.51865	-1.34757	-0.959648	-0.991562
Q81BL4									+	+	+	-0.0088323	-0.714654	-0.012125	-0.109105	-0.0486196	-0.0567856	-0.171476	-0.732097	-1.0694	-1.73605	-2.28133	0.648272	0.00039121	0.999831	0.999319	0.999822	0.999689	0.828708	0.141336	0.00417556	1.76e-05	3.8e-08	0.621737	0.527151	0.438649	-1.70521	-0.0339899	0.496914	0.932924	0.794848	0.821156	0.826852	0.899524	0.82274	0.715127	0.675823	0.674137	0.963465
Q814W7									+	+	+	0.311047	-0.0506153	0.0501664	-0.0406412	-0.121738	-0.0564486	-0.161013	-0.364391	-1.78128	-3.33293	-2.61735	0.9984	0.0633687	0.999831	0.999319	0.999822	0.999689	0.838938	0.628596	1.17e-05	1.73e-10	3.04e-09	-0.0935154	-0.827221	-0.817889	-0.772306	-1.46456	-1.2991	-0.361074	-0.927205	-0.448591	-0.445861	-0.529752	-0.574197	-0.268069	-0.766539	-0.980711	-0.673294
Q81B24		+								+	+	0.0869401	-1.03904	0.109138	0.192305	0.123997	-0.0563062	-0.0468216	-0.430845	-0.827072	-1.05143	-1.50172	0.648869	1.48e-07	0.999831	0.999319	0.999822	0.999689	0.924184	0.30233	0.00246044	0.00019428	7.63e-08	-0.218796	0.666737	0.397017	-1.09826	-1.27766	-0.869427	0.61331	0.674657	0.231066	0.507974	0.760865	0.614169	0.627778	0.639862	0.671782	0.622404
Q815S1		+							+	+	+	0.235474	-1.6016	-0.107655	-0.0773818	-0.0849469	-0.0562782	-0.0533384	0.144283	1.41376	1.6365	1.71288	0.839792	1.63e-13	0.999831	0.999319	0.999822	0.999689	0.821814	0.394648	6.91e-10	2.4e-11	2.06e-10	2.73281	3.00826	2.9898	0.989544	0.724885	0.792877	2.82652	3.01432	3.1185	2.80084	2.94127	2.93083	2.66571	2.92063	2.98434	2.75012
Q81GM5									+			0.432042	-0.588039	-0.11529	0.0175641	-0.155512	-0.0558313	-0.187766	-0.625553	-1.0823	-0.888986	-0.65011	0.737867	1.03e-07	0.999831	0.999319	0.999822	0.999689	0.466855	0.00692467	1.03e-06	2.21e-05	1.73e-05	2.67055	2.41841	2.33322	1.68758	0.968894	0.993101	2.25398	2.3751	2.43187	2.19652	2.28578	2.26934	2.2028	2.37897	2.37534	2.18208
Q817X4		+								+	+	0.365091	-1.9304	-0.0570145	-0.0514399	0.0436802	-0.0557054	0.176041	0.179472	0.899353	1.0469	1.1963	0.955932	8.16e-09	0.999831	0.999319	0.999822	0.999689	0.934738	0.70649	0.00346484	0.0008299	0.00221375	0.109924	-0.185862	-0.00106716	-2.31932	-1.58886	-3.76765	-0.0593758	-0.227071	0.0490627	-0.115041	-0.287753	0.0309286	-0.0821371	-0.348932	-0.117159	-0.0569515
Q81II8										+	+	0.351683	-0.521108	-0.0310326	-0.0351086	-0.104505	-0.0551618	-0.20612	-0.768046	-0.825577	-1.30477	-1.593	0.949733	1.06e-05	0.999831	0.999319	0.999822	0.999689	0.569226	0.00749912	0.000853541	1.79e-06	3.56e-09	2.23942	2.50569	2.30611	1.69076	0.737126	1.2926	2.49524	2.15674	2.27908	2.48074	2.21433	2.17946	2.31208	2.10048	2.25666	2.20037
Q817X8		+									+	0.514407	1.11073	-0.00146612	-0.0118173	-0.103287	-0.0550232	-0.187373	-0.0912368	0.555735	0.67951	1.06903	0.522892	0.0010799	0.999831	0.999319	0.999822	0.999689	0.462104	0.958782	0.000507684	4.75e-05	5.55e-06	2.26082	2.20396	2.35834	3.01063	2.37894	2.51017	1.96518	2.11395	2.13566	2.10541	2.12694	2.01461	1.82065	2.07427	2.1279	1.88188
Q816Q8												-0.318162	0.411944	-0.218076	-0.166663	-0.0895716	-0.0544707	0.14812	0.324523	0.605478	0.280641	0.288025	0.0475986	0.511315	0.999831	0.999319	0.999822	0.999689	0.924184	0.193165	0.00283635	0.0930167	0.630363	2.72071	3.59213	3.67181	3.56546	4.01536	3.88178	3.92188	3.91181	4.04033	3.58748	3.83319	3.83569	3.60603	3.81928	3.79219	3.75125
Q81FY9												-0.796214	-0.694731	0.0962111	-0.139631	-0.137642	-0.0538317	-0.0581303	-0.0333195	-0.0872733	-0.382985	0.284431	0.0512589	0.00160842	0.999831	0.999319	0.999822	0.999689	0.956446	0.988823	0.962711	0.423756	0.797195	-1.4786	-2.47853	0.100104	-1.48937	-1.23429	-1.54127	-0.196045	-0.388442	0.0510025	-0.218677	-0.00562763	0.0160151	-0.023488	-0.505373	-0.58004	-0.310734
Q81FA2		+								+	+	0.161995	-3.88251	-0.00768725	-0.0861753	0.0358442	-0.0536219	-0.309895	-0.251914	-0.555007	1.5335	2.04317	0.84794	2.07e-13	0.999831	0.999319	0.999822	0.999689	0.617831	0.825425	0.139741	1.98e-05	2.59e-06	-0.701889	-0.0773315	0.513923	-4.67456	-3.6907	-4.74591	0.0419426	0.0379725	0.103697	0.316247	0.0607138	-0.179849	-0.154899	-0.069849	-0.00669098	0.148521
Q814A8								+	+	+	+	0.277535	0.422293	0.0480156	-0.283007	-0.351339	-0.0534782	-0.491109	-1.06188	-1.6358	-2.84035	-2.62873	0.979294	0.665699	0.999831	0.999319	0.999822	0.999689	0.312249	0.00749912	1.04e-05	5.82e-10	4.31e-10	2.25985	2.57116	2.44356	2.28134	1.7046	3.01055	2.30696	2.41584	2.65406	2.21789	2.78032	2.55927	2.21059	2.13765	2.02308	2.4553
Q81E02												0.0734978	-0.108811	0.0871372	0.0268523	-0.170231	-0.0533988	-0.0729434	0.130109	0.277202	0.273625	0.723412	0.702633	0.0255257	0.999831	0.999319	0.999822	0.999689	0.924184	0.790178	0.253501	0.237055	0.0715592	-0.752659	-0.151266	-0.0518427	-0.855907	-0.81095	-0.548193	-0.16008	0.0721083	-0.153395	-0.0344858	-0.0493593	0.140452	-0.146762	-0.0375309	-0.133041	-0.0813808
Q81HI3									+	+	+	0.832989	-0.144159	-0.056296	0.012811	-0.0824451	-0.0533473	-0.1909	-0.571749	-2.19299	-2.90206	-2.41697	0.200107	0.0084026	0.999831	0.999319	0.999822	0.999689	0.699498	0.156366	9.91e-09	2.75e-11	1.41e-10	2.54294	2.43448	2.34331	1.71505	0.569009	1.39288	2.03121	2.1898	1.53565	1.78755	1.92033	1.91646	1.84854	1.96146	1.82858	1.98109
Q818R5		+							+	+	+	0.239225	-4.22557	-0.164523	-0.293381	-0.205186	-0.0533168	0.089351	0.771098	2.35109	2.7745	2.91837	0.939319	1.64e-14	0.999831	0.999319	0.999822	0.999689	0.985985	0.0348477	2.3e-08	6.9e-10	1.6e-09	0.854265	0.00696755	0.0287485	-3.96527	-3.91325	-5.33824	0.291109	0.175736	0.640356	0.23912	0.0809412	0.330132	0.257855	-0.00752831	-0.179794	0.17802
Q819Z8		+								+	+	0.312919	-3.43555	-0.0449467	-0.0295035	-0.184802	-0.0525017	0.249949	0.136369	0.836082	1.2554	1.49314	0.997984	3.71e-13	0.999831	0.999319	0.999822	0.999689	0.852207	0.78582	0.00442671	8.37e-05	0.000107858	1.72039	1.22346	1.12675	-1.6574	-2.58819	-3.64156	1.26079	1.3095	1.49645	1.21284	1.32006	1.43556	1.42263	1.23398	1.16509	1.30048
Q817X7		+										0.728507	-1.20844	-0.00561778	-0.0205409	0.033624	-0.0506535	-0.0872148	-0.313637	0.425589	0.492359	0.614307	0.113326	6.14e-11	0.999831	0.999319	0.999822	0.999689	0.768504	0.340803	0.00631322	0.00179833	0.0145895	1.94114	1.67721	1.63789	0.0605106	-0.839944	-0.487537	1.32281	1.32454	1.35827	1.25463	1.42126	1.34943	1.29402	1.24041	1.25304	1.35949
Q81GP2		+							+	+	+	0.253222	-1.28755	0.0232366	0.0451876	-0.190425	-0.0505822	-0.0712414	0.000308993	1.63849	2.30373	2.48411	0.939319	1.75e-08	0.999831	0.999319	0.999822	0.999689	0.902466	0.941172	1.09e-07	1.81e-10	3.41e-10	2.74011	2.47991	2.28862	1.3297	0.672479	0.171801	2.71638	2.49332	2.47417	2.64028	2.49166	2.65821	2.72508	2.48606	2.45177	2.64256
Q812U2		+									+	0.821142	1.28374	0.0730044	-0.0918725	-0.167215	-0.050361	0.114267	-0.00827217	0.578815	0.625341	1.21424	0.0187235	8.81e-06	0.999831	0.999319	0.999822	0.999689	0.932994	0.894085	7.08e-05	1.99e-05	5.18e-08	1.79685	2.11815	1.87769	2.21217	2.15235	2.10362	1.50396	1.51516	1.24504	1.48181	1.51471	1.52321	1.34977	1.09899	1.38326	1.43168
Q81FS1											+	0.106049	0.213775	0.0278664	-0.0062116	0.0616061	-0.0500793	-0.0659491	-0.0557009	0.317411	0.832794	1.34302	0.453818	0.0262417	0.999831	0.999319	0.999822	0.999689	0.776876	0.991318	0.0142692	1.15e-06	1.95e-08	3.3996	3.65607	3.6157	3.32734	3.26789	3.68696	3.81934	3.73987	3.7289	3.72897	3.87031	3.809	3.76516	3.56437	3.78343	3.76933
Q81J18												0.0891412	-0.41448	-0.0433718	-0.0250486	-0.0571995	-0.0495078	-0.0153008	-0.0319773	0.38159	0.00636673	-0.0810757	0.58726	2.43e-05	0.999831	0.999319	0.999822	0.999689	0.941458	0.958782	0.0292905	0.684301	0.201423	3.01394	3.72609	3.91971	3.00499	2.79992	2.63161	3.71511	3.79597	3.81614	3.54735	3.78947	3.89684	3.48967	3.799	3.80688	3.69455
P0A3V0									+	+	+	0.370111	-0.238316	-0.144573	0.0423908	0.00612577	-0.0495033	-0.328068	-0.748487	-2.23668	-2.50676	-2.78696	0.939319	0.0018746	0.999831	0.999319	0.999822	0.999689	0.416376	0.0273877	2.1e-09	1.57e-10	2.63e-12	1.65211	2.17355	2.34087	1.49612	0.902892	1.22989	2.0618	1.93128	1.99802	1.85757	1.85879	1.87758	1.80518	2.0164	2.14016	1.87673
Q815A2									+	+		0.389448	-0.731017	-0.120792	0.077514	-0.0560748	-0.0493253	0.0645612	0.36193	1.33945	1.00955	0.524427	0.906199	4.18e-06	0.999831	0.999319	0.999822	0.999689	0.991494	0.198968	1.56e-06	4.77e-05	0.1494	-0.786545	-0.567717	-0.945426	-1.3373	-2.67598	-2.36016	-0.923113	-0.795896	-0.814129	-0.819451	-0.894637	-1.14486	-0.762273	-0.933121	-0.761726	-0.737822
Q818G1												0.466505	-0.77084	-0.0407041	-0.0455189	0.00301806	-0.0491803	-0.0542908	-0.247142	0.683619	0.778993	0.555993	0.707426	1.59e-07	0.999831	0.999319	0.999822	0.999689	0.883369	0.62808	0.000504159	0.00010342	0.0613344	-0.0192509	-0.00510025	0.227296	-1.06328	-1.69852	-1.45964	-0.087431	-0.446052	0.271807	-0.15952	-0.174928	-0.0127783	-0.387824	-0.191345	0.0244122	-0.174782
Q81GL9		+							+	+	+	0.621228	-1.90092	0.0381896	0.11106	-0.188058	-0.0489057	0.328325	0.651886	1.58532	1.27099	1.02466	0.603371	2.12e-09	0.999831	0.999319	0.999822	0.999689	0.704112	0.0529659	2.89e-06	3.99e-05	0.00504687	2.53321	2.36547	2.06081	-0.444105	-1.21023	0.335009	2.24988	2.08254	1.69827	1.84297	2.17613	2.16272	2.1969	2.02299	1.98746	2.04731
Q81DY9									+	+	+	-0.150141	0.378333	-0.107761	-0.291475	-0.117539	-0.0482858	-0.100307	-0.294706	-1.93978	-2.82315	-3.00951	0.408514	0.582051	0.999831	0.999319	0.999822	0.999689	0.915364	0.737859	1.73e-06	1.93e-09	1.13e-10	2.98864	3.82221	3.64535	3.3154	4.38577	3.62809	3.78721	3.88344	4.17087	3.77061	3.98419	3.79999	3.5007	3.44513	3.86474	3.38167
Q81I05										+	+	0.154607	-0.547984	-0.0647252	-0.0374889	-0.0836144	-0.0474517	0.121545	-0.169002	0.612584	1.36508	1.78129	0.733803	9.19e-06	0.999831	0.999319	0.999822	0.999689	0.957004	0.858932	0.0027055	1.67e-07	2.94e-08	0.39542	0.719816	0.907361	-0.000293732	-0.860642	0.0634041	0.889444	0.679931	0.924295	0.783717	0.798636	0.753703	0.86336	0.608967	0.752352	0.831455
Q81IS8		+										0.718688	-1.31974	-0.0637925	0.0474809	0.071853	-0.0468839	-0.176807	-0.237572	-0.221272	-0.67935	-0.0717805	0.648272	7.22e-05	0.999831	0.999319	0.999822	0.999689	0.890205	0.889185	0.738103	0.157096	0.573245	0.206251	0.325949	0.0536489	-1.67206	-3.55492	-1.01482	-0.206743	0.158095	-0.586672	-0.639382	0.0222597	-0.173013	-0.595128	0.00159836	-0.055872	-0.242901
Q812J1									+	+	+	0.512538	-0.350547	-0.147816	-0.00495402	0.010217	-0.0465641	-0.398368	-0.745272	-1.22143	-1.73529	-1.60557	0.892671	0.0984123	0.999831	0.999319	0.999822	0.999689	0.776876	0.449584	0.0414451	0.00435268	0.00245284	-1.50013	-1.8972	-1.8888	-1.5407	-4.98254	-2.0645	-2.09305	-1.92086	-1.87494	-2.39554	-2.10025	-1.79994	-2.03857	-2.20575	-1.81591	-1.83067
Q819Y3		+										0.330808	-3.26607	-0.116451	-0.0908082	-0.0961641	-0.046271	-0.411512	-0.315708	0.550945	0.344634	-0.374226	0.992932	1.33e-13	0.999831	0.999319	0.999822	0.999689	0.364115	0.628596	0.0282778	0.125631	0.0489146	0.0588398	-0.450142	-0.609694	-3.69553	-3.78013	-5.02831	-0.396374	-0.462979	-0.199173	-0.436257	-0.569177	-0.365882	-0.521583	-0.417912	-0.547981	-0.461084
Q81EF8		+							+	+	+	-0.210121	-3.43437	-0.206642	-0.0799446	-0.0912914	-0.0457408	-0.622053	-0.343417	-1.54865	-2.18611	-2.55457	0.695607	4.39e-07	0.999831	0.999319	0.999822	0.999689	0.630647	0.873721	0.0226812	0.00172705	0.0001203	-0.941677	-0.723063	-0.733039	-2.82894	-6.94054	-3.0134	-0.280375	-0.377934	-0.174212	-0.359454	-0.546144	-0.510287	-0.253749	-0.631903	-0.343227	-0.414652
Q818Y9		+										-0.0679709	1.25902	0.0317148	0.134569	0.00064151	-0.0453974	0.267468	-0.227974	-0.949326	-0.0228812	0.740545	0.482604	0.0148478	0.999831	0.999319	0.999822	0.999689	0.814745	0.832845	0.00395767	0.863414	0.0585699	-2.11501	-0.853397	-1.38996	-0.473785	-0.676368	0.0604115	-1.03695	-0.75883	-1.42378	-1.46658	-0.8145	-0.806769	-1.09313	-1.05804	-0.821213	-1.07219
Q81C41		+							+	+	+	0.107278	-3.1579	-0.151814	-0.0545209	-0.0129731	-0.0441672	0.105576	0.0145626	1.54033	1.96227	1.82931	0.805506	3.84e-11	0.999831	0.999319	0.999822	0.999689	0.985796	0.949417	7.2e-05	2.23e-06	4.77e-05	2.77792	2.79531	2.74091	0.429708	-2.12781	-0.495634	2.97382	3.00428	2.94911	2.81202	2.86725	2.82906	2.84254	2.88511	2.87946	2.93369
Q818H5									+	+	+	1.63921	0.455869	-0.317918	-0.0361179	-0.176325	-0.0438274	-0.212332	-0.827841	1.48828	1.66872	1.48628	0.187151	0.887751	0.999831	0.999319	0.999822	0.999689	0.930452	0.468825	0.0194369	0.00912008	0.0483665	-1.11105	-3.22133	-3.04251	-4.80509	-3.49959	-3.33258	-3.43872	-4.63289	-3.28601	-3.79192	-3.99028	-4.49261	-4.13997	-3.73989	-3.74263	-3.67578
Q81AW8		+									+	0.588097	-3.04532	-0.111165	0.0325489	-0.100002	-0.0424411	-0.154366	-0.609811	-0.592883	-0.795388	-1.55362	0.635282	5.8e-13	0.999831	0.999319	0.999822	0.999689	0.802684	0.154497	0.0619245	0.0123314	6.89e-07	-0.3039	0.106104	-0.0159941	-3.90714	-3.05605	-4.86322	-0.34841	-0.394673	-0.300104	-0.490588	-0.42983	-0.419702	-0.357507	-0.448221	-0.296337	-0.395845
Q81IN1												0.0836379	-0.695785	-0.107064	-0.02716	0.00463613	-0.0419324	-0.00248464	-0.230731	0.232235	0.150424	-0.24571	0.660054	1.79e-05	0.999831	0.999319	0.999822	0.999689	0.971684	0.790178	0.24701	0.369991	0.100188	0.204189	0.144419	-0.508668	-0.561956	-1.41268	-1.23605	0.535965	0.211543	-0.223587	0.283919	0.00423527	-0.0488634	0.314002	0.196026	-0.224112	0.378468
Q814M3									+	+	+	-0.134087	-0.948623	0.0187041	0.10781	0.0929337	-0.0419044	0.240856	0.0204156	-1.40022	-1.9406	-1.25529	0.729736	0.0131467	0.999831	0.999319	0.999822	0.999689	0.956446	0.967735	0.0301585	0.0032112	0.020487	-1.06701	-1.64512	-2.1052	-4.71012	-2.15734	-1.10584	-0.865379	-1.42524	-1.18956	-0.967624	-1.37258	-1.0473	-0.568194	-1.52367	-1.2214	-0.817392
Q81BS5		+								+	+	0.344601	-3.58117	0.0222123	-0.0167662	-0.0169112	-0.0418708	0.153395	-0.185478	0.677691	1.47642	1.63234	0.979294	3.39e-14	0.999831	0.999319	0.999822	0.999689	0.941744	0.873721	0.0101767	3.52e-06	1e-05	0.366528	0.0470543	-0.045989	-3.04714	-4.16204	-4.91289	0.174246	-0.116973	0.211412	0.0643797	0.192445	0.11506	0.155337	-0.0212021	-0.0722733	0.0983143
Q814R6		+								+	+	0.669067	1.53956	0.089817	-0.392054	0.154701	-0.0412248	0.0793521	0.180137	0.983795	1.24476	1.63981	0.650058	0.00951999	0.999831	0.999319	0.999822	0.999689	0.986133	0.790618	0.00775485	0.00108349	0.000418924	0.333029	-0.866312	-1.1428	0.538471	-0.0778456	-0.237587	-0.82373	-0.826705	-1.09796	-0.733811	-0.641418	-1.06715	-1.30469	-1.72081	-1.05558	-0.944294
Q81A60		+							+			0.377881	1.63571	-0.0300649	-0.0203082	-0.118465	-0.041186	-0.170656	-0.155687	-1.06751	-0.901192	-0.0638561	0.859041	7.05e-08	0.999831	0.999319	0.999822	0.999689	0.471774	0.8179	4.52e-07	7.01e-06	0.122326	-0.0215569	0.185286	0.0237169	0.899717	1.34487	1.004	-0.0761089	-0.0708284	0.135633	-0.118632	0.0648355	-0.0111399	-0.0987215	-0.15061	0.0205784	-0.0229912
Q81FW9									+	+		0.306746	0.737247	0.0480881	-0.118032	-0.0131874	-0.0403678	-0.0290718	-0.140029	-1.39361	-1.76364	-0.61057	0.997984	0.45719	0.999831	0.999319	0.999822	0.999689	0.945902	0.932299	1.35e-05	2.85e-07	0.00354917	-0.310038	-0.601501	-0.228812	-0.114449	-0.255603	-0.191154	-0.417597	-0.312688	-0.395411	-0.294953	-0.279807	-0.370109	-0.171372	-0.994497	-0.470446	-0.484854
Q81CT2									+	+	+	-0.0689182	-0.833745	0.0466251	-0.103533	0.150324	-0.0403347	-0.594453	-0.121914	-1.52601	-2.15948	-1.98799	0.810298	0.0411016	0.999831	0.999319	0.999822	0.999689	0.699498	0.988667	0.0367144	0.00377046	0.00279356	-1.9528	-1.57919	-1.82051	-1.80323	-4.61713	-1.93897	-1.23726	-1.78829	-1.18529	-1.31211	-1.55228	-1.17001	-1.18406	-1.73017	-1.76373	-0.859734
Q815F8		+										0.255843	-1.07592	0.0775286	0.010828	-0.0318693	-0.0391903	-0.332981	-0.419444	0.0309124	-0.021946	-0.939681	0.923837	1.11e-09	0.999831	0.999319	0.999822	0.999689	0.238026	0.165394	0.621312	0.775355	1.04e-06	2.63897	2.49496	2.26094	1.24527	0.878457	0.56349	2.67014	2.27502	2.61707	2.69262	2.59231	2.54644	2.60679	2.25327	2.57813	2.57968
Q81A71								+				0.759581	1.06617	-0.0376568	-0.20132	0.709517	-0.0389379	0.248046	1.6329	-0.636919	-0.917047	-0.594815	0.741807	0.400187	0.999831	0.999319	0.999822	0.999689	0.956446	0.0338075	0.377462	0.182086	0.225352	-1.65307	-2.9486	-4.18218	-2.79589	-3.01231	-2.76825	-3.06026	-3.3728	-3.69464	-3.69288	-3.11245	-3.39878	-4.09306	-4.30655	-2.48858	-3.14176
Q819V6												0.2809	0.842224	-0.0462818	-0.0220439	0.00543531	-0.0385373	0.0420265	0.278847	0.561265	0.165613	0.317912	0.953296	0.079932	0.999831	0.999319	0.999822	0.999689	0.985985	0.141336	0.000718622	0.155424	0.435916	1.89422	1.84636	1.56666	1.87565	2.01359	2.38962	1.92168	1.63871	1.83905	1.80513	1.78113	1.71089	1.7855	1.55252	1.83876	1.72352
Q819B1									+	+	+	0.415932	-0.848465	-0.0172723	-0.0828997	-0.162699	-0.0382773	-0.169746	-0.646758	-2.5549	-4.26158	-5.29051	0.939319	0.00221161	0.999831	0.999319	0.999822	0.999689	0.906801	0.404002	3.76e-06	3.8e-10	1.86e-12	2.07982	1.98318	1.62932	-0.434875	1.1055	0.516153	2.1666	1.95501	1.25781	1.62502	1.88369	1.85546	1.56449	1.6764	1.73332	1.37445
Q81G09		+								+		-0.214167	-1.31027	0.0959015	-1.0565	0.352147	-0.0365849	-0.312241	-0.179059	-1.32835	-3.00898	-0.310579	0.752587	0.0167952	0.999831	0.999319	0.999822	0.999689	0.920629	0.96413	0.108442	0.000500793	0.547264	-2.32483	-1.5369	-1.69744	-2.11731	-3.59938	-3.84315	-1.11289	-1.36017	-1.50872	-1.21339	-0.88717	-1.55695	-1.33693	-4.69861	-1.27227	-0.895174
Q81IY1									+	+	+	0.424401	-0.32472	-0.0530128	-0.0010484	-0.0381692	-0.0363051	-0.375532	-0.838859	-1.33982	-1.90005	-1.58644	0.858598	0.00139566	0.999831	0.999319	0.999822	0.999689	0.378901	0.0194367	2.98e-05	1.06e-07	1.9e-07	4.56563	4.69219	4.80639	3.74607	3.76817	3.59026	4.52399	4.43291	4.76901	4.33293	4.84091	4.4296	4.15122	4.55387	4.86115	4.26589
Q81J66		+							+			0.00708071	-1.22682	-0.0750179	0.00376638	0.00677236	-0.0359344	-0.0123088	-0.229	-1.29134	-0.749922	-0.308273	0.198518	3.77e-12	0.999831	0.999319	0.999822	0.999689	0.920629	0.516331	1.18e-08	7.76e-05	0.00233993	4.18951	3.9671	4.07169	2.46119	2.32851	3.02454	4.33441	4.3422	4.46535	4.27848	4.33183	4.34315	4.39293	4.30091	4.30289	4.45553
Q815B2										+		-0.430365	-0.101297	0.209859	-0.298161	0.436658	-0.0359182	1.07844	-0.199521	0.0703583	1.77154	-0.172838	0.499115	0.251708	0.999831	0.999319	0.999822	0.999689	0.344272	0.947495	0.829444	0.00252565	0.563456	-3.9011	-4.61653	-3.74773	-3.81208	-3.88003	-4.2984	-3.11388	-4.35933	-2.56615	-2.67698	-3.18271	-3.51354	-3.09115	-4.4399	-3.55933	-3.54208
Q819M5		+							+	+		0.120956	-1.08201	-0.18976	-0.142272	-0.0231094	-0.0355911	0.00646464	-0.184868	-1.8646	-1.74417	-0.535297	0.483611	1.06e-11	0.999831	0.999319	0.999822	0.999689	0.941744	0.679308	5.66e-12	1.11e-11	2.41e-05	2.11394	1.83177	1.9135	0.559547	0.46601	0.512394	2.15586	2.24702	2.02836	1.95254	1.96913	1.97684	2.1045	1.8575	1.88589	2.15838
Q812R8		+									+	0.598142	-2.04005	-0.0644697	0.13806	0.0762901	-0.0354627	-0.566702	-0.542908	-0.0525366	0.861335	1.30463	0.741807	3.04e-07	0.999831	0.999319	0.999822	0.999689	0.432362	0.464652	0.976409	0.0226243	0.00731064	0.461245	-0.232948	-0.0733595	-2.11116	-4.07226	-2.28859	0.179176	-0.438869	-0.444902	-0.00477886	-0.391147	-0.465516	0.148623	-0.240501	-0.355062	0.102356
Q81BQ9									+	+	+	0.20496	-0.897799	-0.142392	-0.200082	-0.253874	-0.0350501	-0.370849	-0.957865	-1.13669	-2.00671	-3.96439	0.925648	0.00032867	0.999831	0.999319	0.999822	0.999689	0.610639	0.0664651	0.00631322	1.12e-05	1.77e-11	1.50768	1.35951	1.21723	0.955288	-0.119798	-0.771709	1.62329	1.39574	1.3854	1.20606	1.48669	1.32106	1.05244	1.03868	1.55654	1.2786
Q81IU4		+							+	+	+	-0.16305	-4.60297	-0.0471109	-0.0323938	-0.0826365	-0.0334822	0.0998198	-0.119191	-2.04311	-2.2605	-1.74912	0.269858	1.39e-16	0.999831	0.999319	0.999822	0.999689	0.984135	0.953346	3.61e-08	4.14e-09	4.2e-08	0.796461	0.861235	0.670218	-4.14728	-3.33327	-4.22366	1.386	1.1501	1.21586	1.30746	1.15009	1.18964	1.40756	0.967577	1.12312	1.28289
Q813Y7		+							+	+		0.0835616	-1.21583	-0.237635	-0.195707	-0.277257	-0.0331593	-0.100451	-0.108825	-1.15492	-1.69612	-0.837018	0.56746	6.93e-10	0.999831	0.999319	0.999822	0.999689	0.776876	0.949202	4.68e-06	4.63e-09	1.04e-05	0.71335	0.213741	0.40244	-1.10839	-1.2503	-0.922318	0.577353	0.68435	0.752039	0.337977	0.51748	0.481942	0.53498	0.272501	0.462614	0.421253
Q817J3												0.74561	-0.922389	-0.00831541	0.00921821	-0.0821959	-0.0327129	0.0135155	-0.428018	0.101918	0.0160491	-0.278378	0.797868	0.0443569	0.999831	0.999319	0.999822	0.999689	0.986133	0.858932	0.833464	0.90616	0.556954	0.696482	0.731771	0.542495	0.674402	-4.48714	0.0671368	0.235636	0.127917	0.30526	0.165921	0.264615	0.249892	0.140809	0.0866947	0.312439	0.283224
Q812X4												-0.327602	-0.0646515	-0.155041	0.0305119	0.0330512	-0.0324993	-0.0218525	-0.0121384	0.125533	-0.078694	-0.66721	0.0260262	0.00194858	0.999831	0.999319	0.999822	0.999689	0.931279	0.941172	0.325198	0.996578	8.63e-05	2.0721	2.69116	2.25455	2.51348	2.23637	2.34446	2.89949	3.03557	3.00045	2.69882	2.91494	2.89318	2.90394	2.99673	2.96985	2.91124
Q81IP2		+										0.33943	1.18712	-0.0270055	0.0240218	-0.0167141	-0.0308444	0.00261306	-0.0788663	-0.00141081	-0.158858	0.247965	0.939319	1.31e-05	0.999831	0.999319	0.999822	0.999689	0.924184	0.979638	0.6324	0.532331	0.611434	1.04388	1.03052	1.12087	1.77062	1.44445	1.81091	0.967815	1.03085	1.1132	0.914794	1.06125	1.09137	0.995479	0.91926	1.11267	1.03101
Q814V9		+										-0.0187111	1.37922	-0.124977	0.0303904	0.0466499	-0.0302665	-0.440121	-0.0807056	-0.119308	-0.121923	0.414242	0.60559	0.00802338	0.999831	0.999319	0.999822	0.999689	0.40092	0.991318	0.87422	0.896213	0.464304	1.14732	0.461432	0.511453	1.47789	2.08356	2.04019	1.03991	0.675244	1.39607	0.585961	1.0854	1.1015	1.02826	0.863733	1.15389	1.10682
Q81IU6									+	+		-0.274834	-0.255355	-0.0366071	0.00053978	-0.151443	-0.03022	-0.0780773	-0.216553	-2.4244	-2.06556	-0.174674	0.0567573	0.000283922	0.999831	0.999319	0.999822	0.999689	0.842435	0.732893	2.05e-11	2.55e-10	0.0903557	2.80638	2.17187	2.46155	2.12135	2.34743	2.3171	3.10194	3.01596	3.0813	2.93746	2.91345	3.27502	3.05816	3.02603	2.96011	2.8297
Q818F7												0.288284	0.613251	0.00579262	0.0798111	-0.0473817	-0.0301202	-0.0292161	-0.220233	-0.191933	0.0940857	0.323969	0.990865	0.826777	0.999831	0.999319	0.999822	0.999689	0.957982	0.844923	0.688177	0.561044	0.638493	-0.200626	0.256489	0.251531	0.483524	0.45222	-0.365808	0.205509	0.159055	0.0128708	0.186549	0.252425	-0.00759983	0.201032	0.151731	0.10758	0.302673
Q81JB5												-0.0683123	0.961498	0.220997	0.051499	0.143955	-0.0289561	0.0962588	-0.22381	-0.341759	-0.72296	-0.356759	0.610651	0.241966	0.999831	0.999319	0.999822	0.999689	0.985985	0.873721	0.465133	0.0761211	0.14367	-1.09506	-0.470289	-0.23483	-0.341959	1.04262	-0.123766	-0.360359	-0.278052	-0.0219364	0.257253	-0.3623	0.144254	-0.492011	-0.393036	0.222672	-0.0103912
Q817F4												0.294506	-0.198664	-0.114143	-0.113802	-0.0664552	-0.0288442	-0.195425	-0.133425	0.25739	0.0853653	0.119922	0.990865	0.000807137	0.999831	0.999319	0.999822	0.999689	0.595	0.91641	0.130617	0.444661	0.795211	4.35559	4.4954	4.45029	3.56291	3.53504	4.01146	4.39651	4.55219	4.40396	4.22533	4.51389	4.30758	4.0435	4.28541	4.52582	4.14116
Q81J36		+							+	+		0.299319	-1.02339	0.0602074	-0.00331624	-0.0950832	-0.0287228	0.716234	0.65889	1.5918	1.26615	0.897866	0.992932	1.58e-09	0.999831	0.999319	0.999822	0.999689	0.00981919	0.00169138	1.31e-09	3.57e-08	0.000327199	4.22549	3.87125	3.89775	2.57198	2.21435	2.52768	4.05053	3.97027	4.01063	3.95242	4.16753	4.12866	3.96	3.8079	4.09705	3.81477
Q81IQ7									+	+	+	0.488206	-0.0160643	0.0928714	0.0937653	-0.0497583	-0.0286617	0.174688	0.59936	1.96246	1.59559	1.27096	0.660054	0.00445316	0.999831	0.999319	0.999822	0.999689	0.870751	0.00656368	1.12e-10	2.27e-09	3.42e-06	1.73099	1.86309	1.64644	1.30246	1.12186	0.591034	1.85728	1.43026	1.42325	1.72279	1.59394	1.70924	1.69388	1.5776	1.56409	1.6228
Q81FZ7										+	+	0.322677	0.370282	-0.0203298	-0.0181522	-0.120628	-0.028211	-0.0808786	-0.397897	0.938452	1.38418	1.08608	0.996339	0.522359	0.999831	0.999319	0.999822	0.999689	0.918462	0.472062	0.00103269	1.14e-05	0.00259363	-0.091423	-0.0697327	-0.20918	0.255341	-1.42294	0.227724	-0.252525	-0.00220776	-0.148739	-0.2977	0.0805464	-0.210746	-0.271176	-0.165026	-0.178251	-0.272701
Q81H03		+							+		+	0.433568	-2.35254	-0.00298818	-0.16006	-0.236181	-0.0272458	-0.0684719	-0.857342	-1.11898	-0.923202	-1.92604	0.939319	1.04e-06	0.999831	0.999319	0.999822	0.999689	0.971684	0.269879	0.0343382	0.0850332	0.000117165	-0.191036	-0.28191	-0.185678	-2.60028	-3.57611	-3.55293	-0.412859	-0.446435	-0.16514	-0.485274	-0.024148	-0.487414	-0.518691	-0.618746	-0.523703	-0.282713
Q81JA5		+										0.177407	-1.78733	-0.13855	-0.00277456	0.0729396	-0.026612	-0.278002	-0.0975196	0.286116	0.221916	-0.442324	0.839792	2.81e-09	0.999831	0.999319	0.999822	0.999689	0.592619	0.977023	0.212629	0.2825	0.0290165	-0.0423775	0.209755	0.150893	-1.24902	-2.77465	-2.26461	0.0336647	0.187654	0.499626	0.135718	-0.0386229	0.244761	0.0633802	0.188702	0.304014	0.189938
Q81DN5		+								+		0.0505505	-3.28609	0.147168	-0.165003	0.180983	-0.0260048	-0.0280711	-0.278552	-0.713189	-1.08753	-0.347548	0.698237	2.87e-12	0.999831	0.999319	0.999822	0.999689	0.97094	0.78582	0.0480348	0.002858	0.107215	0.689962	-0.194099	-0.900413	-3.94974	-3.91666	-3.26041	0.180529	0.0176268	0.180538	0.14524	0.392301	0.319219	0.00718212	-0.449514	0.169493	0.165037
Q81IJ4		+							+	+	+	-0.216462	-1.72828	-0.413708	0.0558523	0.123382	-0.0251624	0.0255114	-0.0780532	-3.00531	-2.80967	-3.40086	0.660054	0.000302286	0.999831	0.999319	0.999822	0.999689	0.98856	0.997301	1.93e-05	4.21e-05	8.96e-07	-0.978476	-0.858004	-1.65931	-2.03171	-2.43872	-4.27317	-0.329294	-0.510629	-1.07159	-0.544837	-0.708543	-1.86269	-0.273755	-0.900129	-0.726593	-0.218817
Q81EX6		+							+	+	+	0.183678	1.93868	-0.00228246	0.0482896	-0.0367921	-0.024341	-0.262686	-0.796693	-1.33545	-1.54262	-1.13949	0.763472	7.45e-08	0.999831	0.999319	0.999822	0.999689	0.40092	0.00342064	5.5e-07	3.72e-08	2.41e-07	0.848824	1.24154	1.60068	2.77392	2.60732	2.86245	1.26207	1.45781	1.35503	1.24902	1.32976	1.52584	1.21311	1.2972	1.55294	1.40805
Q819V9									+	+		-0.595867	1.08672	-0.513189	-0.544879	-1.0075	-0.0238336	-0.883956	0.699869	2.03579	1.59376	1.43368	0.582983	0.496339	0.999831	0.999319	0.999822	0.999689	0.595738	0.613817	0.0118607	0.0412832	0.125701	-3.78286	-4.3168	-6.30474	-4.07868	-2.82433	-3.16599	-4.29886	-4.6195	-2.76353	-4.35293	-5.09647	-3.73551	-4.04995	-4.78446	-4.63865	-5.83409
Q814F8												0.556485	0.00697009	-0.0354379	0.02292	-0.0370433	-0.023496	-0.14881	-0.0661538	0.298676	-0.0618973	-0.814604	0.669414	0.0491918	0.999831	0.999319	0.999822	0.999689	0.810331	0.998719	0.199428	0.957369	0.000946843	-0.000827789	0.0236015	-0.133452	-1.50407	-0.0870066	-0.880508	-0.257879	-0.142879	-0.444483	-0.294837	-0.147859	-0.472297	-0.231587	-0.413054	-0.288364	-0.0887051
Q816G3										+	+	0.168478	0.248149	0.0158564	-0.228183	0.0665048	-0.022906	0.0338281	-0.375893	-0.918458	-1.26113	-2.59453	0.939319	0.586025	0.999831	0.999319	0.999822	0.999689	0.990507	0.833391	0.135553	0.0387592	2.14e-05	0.424824	0.364529	0.424243	-1.33567	1.06328	1.01263	0.598391	0.358544	0.686121	0.586961	0.47635	0.663877	-0.118337	0.149181	0.771137	0.624514
Q81ID3										+	+	-0.207828	-0.839046	0.0668303	-0.055685	0.0439192	-0.0226186	0.0399329	0.574066	0.513334	1.07166	1.81196	0.18378	3.18e-06	0.999831	0.999319	0.999822	0.999689	0.985985	0.0472071	0.023986	5.26e-05	3.31e-07	-0.532627	-0.121468	0.00713444	-0.682859	-1.82194	-0.748171	0.466791	0.0365381	0.408089	0.597899	0.211637	0.338935	0.467477	-0.0896187	0.20998	0.503103
Q818E9												0.127274	-0.234962	-0.0442371	-0.0746422	-0.0613168	-0.021314	-0.123366	-0.235767	0.232396	0.223959	0.180129	0.542579	8.95e-06	0.999831	0.999319	0.999822	0.999689	0.595122	0.497566	0.0528823	0.0502538	0.995499	4.80138	4.84986	4.94305	4.27609	4.11353	4.4056	4.88087	5.15709	5.10941	4.81637	5.17466	5.06018	4.77437	4.9277	5.06483	4.9094
Q815Q6		+							+	+	+	-0.244146	-1.15342	-0.102561	-0.12001	-0.108981	-0.0212428	-0.027593	-0.280032	-1.43227	-1.77708	-1.51737	0.452212	0.000126859	0.999831	0.999319	0.999822	0.999689	0.981289	0.84614	0.00160943	0.000156374	0.00016945	-2.35804	-1.26648	-1.02071	-3.96903	-2.64547	-1.47091	-1.03512	-1.09807	-0.844696	-0.914039	-1.39929	-0.935681	-1.10389	-1.36957	-1.02099	-0.858923
Q817E9		+							+	+	+	0.511177	-1.54228	-0.0694294	-0.151179	-0.20015	-0.0203603	0.243898	0.212189	1.5964	1.95685	1.6855	0.695607	1.35e-09	0.999831	0.999319	0.999822	0.999689	0.792794	0.482338	1.45e-07	3e-09	6.07e-07	2.20567	1.56458	1.3794	0.119244	-0.932797	-0.909534	1.62794	1.4616	1.46146	1.45551	1.43699	1.48678	1.52614	1.15709	1.2577	1.32284
Q81IA8		+							+	+	+	-0.0819187	-2.57465	-0.189898	-0.110362	0.0358111	-0.0203209	-0.00516574	-0.166462	-2.52314	-3.68412	-4.11696	0.584735	8.85e-10	0.999831	0.999319	0.999822	0.999689	0.981289	0.933704	1.22e-07	8.07e-11	2.35e-12	-0.185501	-0.300714	-0.541045	-2.19971	-2.84094	-4.17717	0.223875	-0.382236	0.31175	0.302939	-0.283402	-0.39928	0.30989	-0.303934	-0.340178	0.293865
Q81GF3		+							+	+	+	0.0149422	-3.55307	-0.127898	-0.306272	-0.0926596	-0.0197309	0.137483	0.103945	2.716	3.59774	3.95038	0.655001	5.8e-13	0.999831	0.999319	0.999822	0.999689	0.971684	0.846329	2.77e-09	8.33e-12	4.34e-12	-0.417072	0.0486565	-0.319156	-4.35295	-2.82357	-4.92746	0.121696	-0.102807	0.183607	-0.000409126	-0.0456285	-0.0985975	-0.28917	-0.48711	-0.0965633	-0.00712395
Q817A0									+	+		-0.309839	-0.781836	0.0364424	-0.058403	-0.0691655	-0.0194842	-0.173889	-0.164262	-1.98078	-1.91944	-0.215305	0.0422922	2.42e-07	0.999831	0.999319	0.999822	0.999689	0.616941	0.859195	8e-10	9.48e-10	0.0582336	3.02185	3.48158	3.36017	2.64109	2.4595	2.63466	4.09783	3.8838	3.74638	3.94536	4.04384	3.88471	3.7351	3.73111	3.93007	3.90962
Q812I2												0.52647	0.177737	0.0585982	0.108099	0.415621	-0.0190067	0.534039	0.497494	0.4595	-0.331405	0.339943	0.846194	0.414509	0.999831	0.999319	0.999822	0.999689	0.659439	0.45704	0.265864	0.593439	0.749385	-2.30482	-2.26551	-2.44744	-3.67926	-2.43172	-2.66535	-2.50829	-2.36402	-2.78998	-2.4138	-2.42695	-2.60917	-2.34895	-2.35215	-2.79342	-1.70173
Q81AL1									+	+	+	0.698581	-0.21497	0.138714	0.095679	0.0470848	-0.0188287	-0.178751	-0.567293	-2.31372	-3.1122	-3.21915	0.449726	0.00694542	0.999831	0.999319	0.999822	0.999689	0.762488	0.199776	1.29e-08	2.69e-11	2.55e-12	2.29204	1.83725	1.6585	0.962765	0.724298	0.647713	1.66659	1.34781	1.61254	1.61758	1.70075	1.76131	1.60778	1.41556	1.73411	1.69912
Q81F14		+										0.793761	-1.58223	0.129373	-0.111748	-0.161057	-0.0187283	-0.137829	-0.308289	0.554682	0.109601	-0.0130742	0.542579	5.15e-06	0.999831	0.999319	0.999822	0.999689	0.916724	0.803193	0.123748	0.64413	0.64809	0.591528	0.0178833	-0.226562	-2.20683	-3.64815	-1.6025	-0.190819	-0.198028	-0.674692	-0.0611162	-0.214805	-0.362937	-0.207009	-0.885731	-0.462566	-0.461121
Q81IE1		+							+	+	+	-0.33718	-1.87818	0.0877609	-0.00546583	-0.0145632	-0.0185159	0.0168667	0.60753	1.52142	2.09829	2.02749	0.169418	6.41e-09	0.999831	0.999319	0.999822	0.999689	0.985985	0.0938284	1.06e-05	5.8e-08	9.18e-07	-1.01183	-1.09698	-1.22177	-1.92308	-3.88829	-2.85458	-0.437588	-0.356462	-0.590096	-0.359944	-0.286143	-0.438212	-0.513881	-0.735756	-0.30743	-0.408924
Q812J6										+	+	0.366037	0.681521	0.168879	-0.109999	0.0994008	-0.018383	0.224549	0.140133	0.83616	1.12957	1.1179	0.939319	0.568531	0.999831	0.999319	0.999822	0.999689	0.821814	0.648732	0.000492627	1.28e-05	0.000317659	-0.853382	-0.611324	-0.525456	-0.664764	-0.749076	-0.342228	-0.909468	-0.675633	-0.568279	-0.636731	-0.563563	-0.409886	-0.836295	-1.20325	-0.600351	-0.743408
Q814N9		+										0.563549	-1.67073	-0.301093	-0.668418	-0.658723	-0.0158545	-0.468008	0.135164	0.228736	0.225241	-0.475789	0.853244	0.000312893	0.999831	0.999319	0.999822	0.999689	0.711793	0.911201	0.630118	0.604	0.261719	-1.17207	-1.49322	-2.38666	-4.36278	-2.80438	-5.29998	-1.9043	-2.57197	-1.33144	-2.15285	-2.32777	-2.1938	-3.71751	-2.18641	-2.06556	-3.0069
Q812V5		+							+	+		-0.0856641	-2.9227	0.00485102	0.0143998	0.00968297	-0.0155926	0.0291526	-0.208328	-1.26654	-1.33648	-0.777163	0.546051	3.46e-11	0.999831	0.999319	0.999822	0.999689	0.985985	0.873721	0.000801311	0.000452683	0.00562907	0.627234	0.718737	0.630773	-2.64232	-1.39473	-3.20968	1.01097	1.27469	0.882977	0.901866	1.20219	1.11569	1.05987	0.914698	1.08074	1.12463
Q817R0		+							+	+	+	0.439648	-2.07504	-0.0567112	0.0146993	0.0367184	-0.01544	0.202641	0.330551	1.10216	1.60536	1.39482	0.839792	1.38e-10	0.999831	0.999319	0.999822	0.999689	0.897403	0.331725	0.000112225	5.63e-07	6.46e-05	-0.770269	-1.5539	-1.62825	-3.86623	-3.59246	-4.75016	-1.33399	-1.36526	-1.63722	-1.48436	-1.4531	-1.53259	-1.29605	-1.58575	-1.5671	-1.39414
Q818D6									+	+	+	-0.120184	0.141629	0.13835	0.21823	-0.00735156	-0.0150566	0.0954736	-0.0430552	-2.28017	-2.86216	-3.60825	0.603371	0.295271	0.999831	0.999319	0.999822	0.999689	0.985985	0.991318	4.95e-06	1.02e-07	3.82e-10	-0.127327	0.684231	0.169902	0.204039	0.405793	0.190056	0.95788	0.588729	0.475643	0.895505	0.825135	0.753222	0.923671	0.80401	0.792736	0.773951
Q81JA8												0.466407	0.390867	-0.00839551	0.0116749	-0.033865	-0.0146707	-0.0211703	-0.0260226	0.454435	0.533198	0.648081	0.501728	0.183987	0.999831	0.999319	0.999822	0.999689	0.848622	0.920483	0.000143228	1.64e-05	0.000440102	2.56906	2.63024	2.53936	2.14814	2.4376	2.21395	2.35763	2.38576	2.53093	2.44913	2.41294	2.42363	2.23527	2.39645	2.52112	2.30418
Q81EK4									+	+		0.069369	-0.904991	-0.068765	-0.172818	-0.00874011	-0.0144107	-0.00894483	-0.187865	-1.88176	-2.43069	-0.888393	0.651677	2.34e-06	0.999831	0.999319	0.999822	0.999689	0.971684	0.864665	1.09e-07	7.1e-10	0.000186609	2.22709	2.01894	2.06293	0.121254	0.901591	1.65067	2.3901	2.07662	2.56902	2.28342	2.16391	2.41868	2.36365	2.08722	1.90989	2.38468
Q813L9												0.575609	-0.237963	-0.0684516	-0.0312513	-0.0809924	-0.0141652	0.0466887	-0.041062	0.432383	-0.274399	0.00556564	0.457414	0.00021165	0.999831	0.999319	0.999822	0.999689	0.98856	0.977023	0.0137136	0.317252	0.391778	0.451601	0.0609665	-0.0589418	-1.17601	-0.523124	-1.00031	-0.108723	-0.133834	-0.0957508	-0.19171	-0.159305	-0.156085	-0.325942	-0.220158	-0.0424862	-0.302462
Q812M0		+							+	+	+	-0.444346	-1.39721	-0.0939458	-0.0824261	0.068409	-0.0139389	-0.224232	-0.470617	-3.40638	-3.56217	-2.03964	0.316393	8.81e-05	0.999831	0.999319	0.999822	0.999689	0.859839	0.628596	4.54e-08	1.47e-08	2.07e-05	-1.96987	-2.17644	-1.63623	-2.81734	-4.13973	-2.3964	-1.38591	-1.21309	-0.915607	-1.42481	-1.29547	-1.0396	-1.57105	-1.36925	-0.978106	-1.08121
Q815R9		+							+	+	+	0.826873	-1.22661	-0.185406	-0.152075	-0.163959	-0.0137552	0.493929	0.563098	1.81254	1.71395	1.27709	0.242335	2.87e-07	0.999831	0.999319	0.999822	0.999689	0.412681	0.0845045	1.84e-07	3.15e-07	0.000297182	-1.30324	-2.00489	-1.45758	-3.2148	-4.08764	-4.33605	-2.24582	-2.31885	-1.74676	-2.33349	-2.09502	-2.40257	-2.04499	-2.43678	-2.44241	-1.97718
Q816Q7	+	+									+	-1.45011	-3.62639	-0.0299079	-0.189976	0.0985171	-0.0131467	0.103107	0.227619	0.0598412	0.39402	2.29515	0.00983243	4.64e-10	0.999831	0.999319	0.999822	0.999689	0.985985	0.791213	0.79731	0.299299	4.5e-05	-0.66758	-3.32075	-1.16724	-4.55403	-4.49588	-3.34685	0.128593	-0.167241	0.16831	0.0996637	-0.129575	0.106412	0.0965662	-0.605913	-0.0874443	0.264187
Q817I8											+	0.708096	0.321554	-0.0403652	-0.0746212	-0.0625884	-0.0128352	0.0136363	0.0139777	0.871414	0.953547	1.45354	0.0325077	0.0595585	0.999831	0.999319	0.999822	0.999689	0.941744	0.792294	3.05e-08	3.56e-09	6.87e-11	2.90126	2.72407	2.73725	2.41518	2.00763	2.06779	2.35461	2.33937	2.4792	2.42784	2.31029	2.35052	2.18928	2.30105	2.30246	2.23279
Q81FL8												0.409631	-0.681187	0.0318457	0.129973	-0.00838598	-0.0120029	0.0905666	-0.144736	-0.508209	-0.629677	-0.510221	0.820311	1.57e-07	0.999831	0.999319	0.999822	0.999689	0.981289	0.873721	0.0194251	0.00411524	0.000558706	1.66064	1.84442	1.78405	0.908026	-0.0135317	0.409805	1.61395	1.7298	1.65136	1.56538	1.79236	1.76947	1.65908	1.64093	1.9285	1.62693
Q818M4		+							+	+	+	0.200464	-2.59022	0.0760078	-0.225757	-0.182899	-0.0118783	0.0680974	-0.0407823	2.06325	2.44748	1.80274	0.949696	4.41e-06	0.999831	0.999319	0.999822	0.999689	0.993961	0.991318	0.000715084	9.93e-05	0.00716152	1.61125	0.922792	0.755591	-4.24738	-1.13048	-0.416893	1.54253	0.940164	1.14044	1.53023	1.05831	1.29918	1.1531	0.631308	1.00493	1.01542
Q81E41		+										0.173436	-2.95983	-0.0875727	-0.14175	-0.172443	-0.0114619	-0.190552	0.0310103	0.820191	0.701782	0.371399	0.790917	2e-14	0.999831	0.999319	0.999822	0.999689	0.630647	0.888891	0.000456083	0.00150144	0.422613	-0.403336	-0.768383	-0.942079	-4.5613	-3.89808	-3.76659	-0.679008	-0.639224	-0.38098	-0.651258	-0.693755	-0.580356	-0.476686	-0.757771	-1.04653	-0.598146
Q814H6									+	+	+	0.256104	0.0624396	-0.0659974	-0.126254	-0.0614535	-0.0113328	-0.28307	-0.73713	-2.61257	-3.19168	-3.09027	0.939319	0.0255257	0.999831	0.999319	0.999822	0.999689	0.430403	0.0147149	1.62e-11	1.98e-13	4.53e-14	2.30897	2.45659	2.37117	2.01401	1.89643	1.93294	2.22358	2.67409	2.40564	2.27022	2.56488	2.30677	2.08375	2.341	2.34327	2.32708
Q81FK6		+										-0.0733096	-1.27167	-0.0401459	-0.0259863	-0.0618922	-0.0112286	0.0066344	-0.0213089	0.0584189	0.232592	0.800602	0.387724	5.3e-08	0.999831	0.999319	0.999822	0.999689	0.981289	0.958782	0.646469	0.22607	0.0181089	-0.139345	-0.216623	-0.134273	-1.49487	-0.963254	-2.33956	0.045187	0.215352	0.404043	0.151881	0.17065	0.258176	0.275374	0.0495987	0.105125	0.224646
Q81FU1		+										0.00209236	-2.63806	-0.0198981	-0.0589555	0.072588	-0.0107015	-0.0866248	-0.0571391	-0.249537	-0.390729	-0.28562	0.58726	6.51e-12	0.999831	0.999319	0.999822	0.999689	0.906801	0.995855	0.533914	0.263496	0.100977	2.0446	1.35942	1.17128	-1.34999	-0.61645	-2.09108	2.03458	1.60563	1.8637	1.82135	1.90802	1.75141	1.69412	1.52344	1.95296	1.94097
Q814I2		+								+	+	0.57343	-1.09546	-0.144691	-0.024224	-0.0908814	-0.010383	-0.395606	-1.07485	-0.596076	-1.09719	-1.40161	0.794369	0.00047988	0.999831	0.999319	0.999822	0.999689	0.659439	0.0829407	0.238823	0.0238665	0.000883166	0.312698	0.425125	0.389703	-0.781866	-3.27098	-0.538662	0.0242443	0.193517	0.124371	-0.163941	0.196448	-0.0878859	-0.29526	0.0714321	0.336763	-0.107821
Q81BY9		+							+	+	+	-0.356975	-4.91905	0.031222	-0.0334276	-0.0148258	-0.0102094	0.099748	-0.173121	-2.52336	-3.26784	-3.19094	0.481577	2.33e-11	0.999831	0.999319	0.999822	0.999689	0.985985	0.951922	3.28e-05	6.05e-07	2.59e-07	0.847044	0.359739	-0.418672	-3.87762	-4.30811	-5.42474	1.07008	0.629785	1.09406	1.04198	0.945746	0.936433	1.24167	0.556122	0.739328	1.0365
Q81A48		+								+	+	0.18831	1.45116	-0.0223382	-0.105308	-0.0221011	-0.0100708	0.178914	-0.18235	0.934771	2.17998	2.78358	0.750764	1.44e-05	0.999831	0.999319	0.999946	0.999689	0.837458	0.790178	5.11e-06	1.8e-12	9.52e-14	-0.248205	-0.615473	-0.300759	0.20462	1.00315	0.703987	-0.346106	-0.249932	-0.198435	-0.450734	-0.100163	-0.274028	-0.44523	-0.638996	-0.182695	-0.265001
Q817R6												0.344961	-0.0100206	-0.0456003	-0.0563183	-0.0701682	-0.00998751	-0.063385	0.0134977	0.600787	0.701033	0.722522	0.939319	0.000208022	0.999831	0.999319	0.999822	0.999689	0.746278	0.832845	3.39e-05	3.21e-06	0.000368236	2.70073	2.59677	2.67651	2.18963	1.8816	2.12548	2.60786	2.67241	2.59376	2.49628	2.65468	2.62283	2.4303	2.41683	2.70142	2.5738
Q81FQ9												0.48483	0.961977	-0.171135	0.0529601	0.152337	-0.00991376	-0.297557	-0.544641	0.00491206	0.168805	0.236922	0.696416	0.0486313	0.999831	0.999319	0.999822	0.999689	0.371248	0.0879619	0.755954	0.247555	0.802379	4.4999	4.70305	4.77628	4.88438	5.00855	4.8054	4.35225	4.44512	4.66227	4.04021	4.5191	4.42349	4.35729	4.51009	4.59462	4.41047
Q817A2									+	+	+	0.227757	0.872483	-0.0116889	-0.0401999	0.0905469	-0.00982921	0.37896	0.499914	1.42532	1.22573	1.07916	0.820122	0.0367375	0.999831	0.999319	0.999822	0.999689	0.25465	0.00413985	6e-10	4.06e-09	2.34e-06	0.25886	0.315235	0.173408	0.997435	0.526448	0.44544	0.25456	0.369773	0.374792	0.221457	0.402318	0.376845	0.145667	0.1206	0.455734	0.281332
Q81EL1		+							+	+	+	0.55681	-1.73407	-0.264456	-0.130223	-0.0067482	-0.00958379	-0.0240987	-0.0234871	1.17542	1.78915	2.03451	0.739546	1.48e-07	0.999831	0.999319	0.999822	0.999689	0.971684	0.976748	0.000751785	4.3e-06	5.12e-06	0.502615	0.142382	0.0102129	-2.71075	-2.48417	-1.73485	-0.305237	-0.215821	0.440731	-0.299863	-0.180724	-0.356547	-0.291842	-0.175135	-0.160543	-0.371769
Q818J4		+							+		+	-0.130968	-1.56089	0.0267347	-0.0807997	-0.0455297	-0.00911967	-0.169809	-0.137972	-1.19837	-0.80151	-1.61084	0.482604	5.04e-07	0.999831	0.999319	0.999822	0.999689	0.837458	0.951663	0.00175238	0.0356845	8.19e-06	3.11702	3.20624	3.73739	2.10987	1.3433	1.60535	3.84244	3.78513	3.76088	3.85405	3.76629	3.88489	3.80279	3.34948	3.83727	3.90475
Q812K3												-0.196573	-0.352631	0.00652186	0.0546792	-0.00175095	-0.00907644	0.0536404	0.0403595	-0.984543	-0.479623	-0.0757561	0.035336	2.61e-06	0.999831	0.999319	0.999822	0.999689	0.992848	0.790178	3.08e-06	0.0149227	0.11868	-0.633842	-0.347895	-0.0606108	-0.811863	-0.77909	-0.631926	0.0927277	0.0820036	0.307535	0.210662	0.0898409	0.237891	0.281201	0.13311	0.0754681	0.253551
Q816Y3												0.0523351	0.904961	0.0798511	0.0372512	-0.0582212	-0.00843239	0.154578	-0.0855026	-0.82189	-0.717196	0.169216	0.268082	0.0130988	0.999831	0.999319	0.999822	0.999689	0.831483	0.96413	9.59e-06	7.17e-05	0.950831	0.184586	0.397799	0.44101	0.859207	0.879937	1.12977	0.596827	0.648431	0.556026	0.631722	0.747529	0.698148	0.488902	0.456049	0.811562	0.682264
Q81F67		+								+	+	-0.691221	-1.86299	0.0551243	-0.0704759	-0.302842	-0.00833384	-0.719095	-0.0690816	-1.06271	-1.50445	-2.15267	0.279667	0.0001023	0.999831	0.999319	0.999822	0.999689	0.506955	0.998719	0.0809989	0.0137929	0.000194175	-1.8918	-2.24938	-3.63563	-4.24137	-3.06683	-4.69625	-1.30145	-1.526	-1.9408	-1.35676	-1.37975	-1.8298	-1.20205	-1.94513	-1.98903	-1.44336
Q81J49		+										-0.389421	-1.92308	0.0205485	-0.100998	-0.131098	-0.008255	0.140088	0.0269133	0.588312	0.0236975	0.501814	0.563934	0.000148876	0.999831	0.999319	0.999822	0.999689	0.984441	0.963953	0.281637	0.875339	0.610576	-0.764112	-2.57276	-0.909148	-2.36513	-3.61718	-3.57705	-0.643454	-0.700536	-0.798876	-0.653464	-0.65504	-0.736154	-0.86564	-0.98538	-0.751364	-0.583303
Q81FR7		+							+	+	+	0.250972	-3.53806	-0.0949612	-0.19006	-0.35043	-0.00812594	-0.253516	-0.800435	-1.2038	-1.76279	-1.72513	0.979294	4.65e-09	0.999831	0.999319	0.999822	0.999689	0.861327	0.33253	0.0264176	0.00153047	0.000481383	1.48813	1.49504	1.54117	-0.493404	-3.58266	-3.47905	1.3782	1.62163	1.7065	1.60365	1.47065	1.38371	1.2884	1.30424	1.38698	1.32148
Q815N8									+	+	+	0.471685	-0.657764	0.137456	-0.232277	-0.202447	-0.00800451	-1.05655	0.209794	1.18301	1.27487	1.39003	0.924823	0.0248079	0.999831	0.999319	0.999822	0.999689	0.25465	0.852543	0.023986	0.0147977	0.0285827	-2.28519	-2.7162	-1.8694	-3.60014	-4.55377	-2.81758	-1.97554	-2.79827	-2.57715	-2.24193	-2.11678	-2.54332	-2.01098	-3.36368	-2.82964	-2.39624
Q816F8		+										-0.139314	-1.81589	-0.0597483	-0.0315583	-0.260799	-0.00722885	0.262527	0.0419515	0.00726255	-0.00234349	0.43496	0.57392	8.05e-07	0.999831	0.999319	0.999822	0.999689	0.904201	0.941172	0.862629	0.860991	0.532381	-2.24907	-2.08459	-2.05054	-2.52987	-5.23715	-4.35926	-1.69295	-1.64246	-1.69596	-1.68034	-1.70825	-1.78545	-1.64567	-1.93578	-1.70111	-2.2492
Q816E0												0.738821	-0.751655	-0.103835	-0.0987116	-0.0698007	-0.00651105	0.116482	0.0212714	0.437829	0.246801	-0.542226	0.256258	2.7e-06	0.999831	0.999319	0.999822	0.999689	0.971684	0.902074	0.0334859	0.162854	0.00323435	1.66257	1.57677	1.41738	0.0709476	-0.693198	0.0951881	1.15229	1.08888	1.13399	1.12644	1.06417	0.909595	0.975581	0.912279	1.03463	1.1816
Q815F1		+							+	+	+	0.169641	-3.50772	-0.182236	0.0123819	-0.147149	-0.00521279	0.0892798	-0.323922	-3.54736	-3.12638	-1.66256	0.883049	1.93e-11	0.999831	0.999319	0.999822	0.999689	0.985985	0.765698	9.43e-10	6.26e-09	2.22e-05	0.00381851	-0.242439	-0.227311	-4.14404	-4.48384	-3.5825	-0.0303345	0.0608625	-0.0704899	-0.209363	-0.138215	-0.202531	-0.0628691	-0.0220757	-0.0743961	-0.375381
Q818R2		+										-0.900535	-4.11264	-0.00280253	-0.0243486	-0.153952	-0.00513649	0.257501	0.0458736	0.0980892	-0.024985	-0.265954	0.00147314	4.38e-16	0.999831	0.999319	0.999822	0.999689	0.787486	0.873721	0.537978	0.847708	0.084307	0.470972	0.172318	0.39125	-3.84711	-2.69648	-2.77055	1.54659	1.57285	1.5516	1.49406	1.60046	1.60468	1.67626	1.0437	1.72151	1.27452
Q815H1												0.430995	0.874713	0.0486037	-0.0286051	-0.0294431	-0.00506274	-0.108163	0.0941919	-0.219095	0.315899	0.488879	0.839792	0.180018	0.999831	0.999319	0.999822	0.999689	0.838938	0.792294	0.562098	0.114619	0.220667	-0.537136	-0.858027	-0.900193	-0.422211	-0.550626	-0.703722	-0.801344	-0.725324	-1.12678	-1.27826	-0.546205	-0.646607	-1.00296	-0.886915	-1.00591	-1.01088
Q814R3		+							+	+	+	-0.16597	-1.96561	-0.0568892	-0.0892226	-0.0340201	-0.00497818	0.18785	-0.0511729	-2.66455	-4.01285	-3.53091	0.279667	3.44e-10	0.999831	0.999319	0.999822	0.999689	0.918462	0.991318	4.75e-10	1.15e-13	2.19e-13	1.26726	0.971786	0.802743	-0.832827	-1.16608	-1.07058	1.58925	1.24834	1.637	1.44348	1.38737	1.50963	1.71153	1.22074	1.11813	1.3698
Q81H06												0.398258	-0.309377	-0.0516122	-0.0870399	-0.0976098	-0.00454521	-0.0559305	-0.0963338	-0.166043	0.139062	0.414376	0.853244	7.52e-05	0.999831	0.999319	0.999822	0.999689	0.88073	0.958782	0.634121	0.267507	0.237454	1.40852	0.680542	0.701539	-0.359529	-0.0187426	0.333614	0.856663	0.93786	0.736202	0.716041	0.807788	0.888621	0.75941	0.503788	0.849882	0.725809
Q81DV3		+							+	+		0.321384	-1.15502	0.0854556	0.230613	-0.0464452	-0.00226911	0.120623	-0.0639693	-1.54696	-1.96886	-0.0495097	0.996339	4.82e-08	0.999831	0.999319	0.999822	0.999689	0.97094	0.998719	8.11e-07	9.25e-09	0.348614	0.283188	0.382168	0.38153	-1.42674	-0.823972	-1.84395	0.462046	0.363858	0.191725	0.328456	0.492332	0.48977	0.701024	0.395678	0.456242	0.613405
Q81I04		+							+	+	+	0.528531	-2.7104	0.0437927	-0.14071	-0.0917486	-0.00161044	-0.0477556	-0.321067	1.65392	2.57565	2.50897	0.706662	3.03e-12	0.999831	0.999319	0.999822	0.999689	0.934355	0.620835	7.26e-07	2.53e-10	3.06e-09	-0.356926	-0.0825882	-0.68234	-3.94527	-3.33313	-4.27261	-0.421734	-0.677966	-0.672853	-0.482587	-0.525268	-0.596759	-0.188216	-1.05578	-1.10721	-0.359436
Q817U6												0.278807	0.0718772	-0.0977058	-0.114096	0.011205	-0.00152079	0.134665	-0.0889359	0.249662	0.0569255	-0.0102812	0.964682	0.0231954	0.999831	0.999319	0.999822	0.999689	0.939832	0.978943	0.139203	0.530752	0.384909	1.75826	2.20535	2.16465	1.94834	0.969392	1.87738	1.97864	2.04041	2.20768	1.94923	1.98885	2.03209	1.83561	1.89289	1.99941	1.98034
Q814K9												0.332676	1.03997	0.112514	-0.022089	-0.30283	-0.00148519	0.107142	0.115611	0.568405	0.228535	-0.300024	0.996339	0.281908	0.999831	0.999319	0.999822	0.999689	0.985985	0.896326	0.182316	0.519862	0.317661	1.88176	1.74388	1.54933	1.6399	4.10559	0.83901	1.75125	1.79006	1.57053	1.66842	1.81309	2.00443	1.80245	1.41233	1.67427	1.52627
Q815Z1		+							+	+		0.111899	-1.2565	0.225305	0.134616	-0.16391	-0.000912983	-0.447485	0.196086	1.08076	1.53442	0.566263	0.769137	1.81e-06	0.999831	0.999319	0.999822	0.999689	0.40092	0.67492	0.000754407	1.15e-05	0.225579	3.16621	2.53661	2.36701	0.990728	0.91253	1.34902	3.28875	2.77064	2.60965	3.14104	3.2192	3.02126	2.89916	2.82292	3.19428	3.00795
Q814Q1		+							+	+	+	0.294895	-4.02555	-0.0811145	0.0113614	-0.117807	-0.00073751	0.0712592	0.491396	1.30438	1.02622	1.06013	0.996339	3.64e-11	0.999831	0.999319	0.999822	0.999689	0.991494	0.425591	0.00303407	0.0139612	0.0486878	0.999586	1.18367	-0.0997725	-3.71669	-2.68552	-5.18799	0.921495	1.01346	0.198746	0.742761	0.694287	0.489867	0.494208	0.977488	0.53956	0.356958
Q81E03		+										-0.0996342	-2.05047	-0.213243	-0.00604566	-0.173906	0.000161487	-0.235338	-0.303611	-0.324654	-0.18867	-0.619417	0.269946	6.51e-12	0.999831	0.999319	0.999822	0.999689	0.550672	0.541667	0.264416	0.632613	0.00105987	0.187675	0.0525436	0.0288534	-1.99565	-2.60441	-1.69575	0.416536	0.62502	0.461313	0.414117	0.271764	0.21382	0.36926	0.435265	0.523684	0.334372
Q81IZ5										+		-0.360297	0.248221	0.0449212	0.0614923	0.0681597	0.000401183	0.0567144	-0.0848115	-0.928541	-1.56348	-0.780059	0.0810973	0.227175	0.999831	0.999319	0.999822	0.999689	0.999859	0.988825	0.00157778	1.81e-06	0.000543941	-1.63549	-1.62351	-1.06505	-0.470289	-1.40654	-1.33403	-0.808987	-0.846854	-0.65243	-0.736875	-0.674966	-0.725104	-0.584472	-0.854464	-0.841383	-0.76948
Q81IC6		+										0.0519594	-3.19717	0.0601355	0.345751	0.44567	0.00138283	0.629114	0.392661	0.210015	0.897764	0.278196	0.695607	3.09e-12	0.999831	0.999319	0.999822	0.999689	0.319488	0.340216	0.396441	0.00324728	0.770938	-0.401014	0.0431519	0.0345984	-4.14724	-2.87126	-3.7645	-0.159006	0.309281	0.305477	0.000409126	0.29651	0.375802	0.179002	0.420902	0.736576	0.19136
Q81IB2											+	0.278408	0.338669	-0.115903	0.0145537	-0.118071	0.00210953	0.116036	-0.159612	-0.842468	-0.910807	-1.33325	0.939319	0.156725	0.999831	0.999319	0.999822	0.999689	0.933145	0.79746	1.57e-05	4.54e-06	1.52e-10	1.09253	1.36816	1.36447	1.2497	0.902736	1.14115	1.3643	1.21949	1.34103	1.20144	1.15084	1.2614	1.25391	1.31655	1.2415	1.40734
Q813Z5		+							+	+		-0.436605	-3.108	-0.391377	-0.0155786	-0.153927	0.00231806	-0.103236	0.110508	1.02441	1.38694	0.687636	0.199759	1.29e-10	0.999831	0.999319	0.999822	0.999689	0.924184	0.866626	0.00515942	0.000315943	0.178461	0.140911	-0.687107	-1.44212	-2.95266	-3.82213	-3.94008	0.0305328	-0.105828	0.33169	-0.507483	-0.0298071	-0.343884	-0.170592	0.0887794	0.134947	-0.303463
Q817P9												0.190676	0.1278	-0.0883897	-0.0999247	0.0185706	0.00241916	-0.105995	0.0197531	-0.498281	-0.474234	-0.197997	0.815652	0.0544106	0.999831	0.999319	0.999822	0.999689	0.811358	0.900412	0.0556526	0.0772584	0.0957575	1.8333	0.973295	1.19404	1.11285	0.798888	1.18792	1.46326	1.37628	1.52396	1.33138	1.33119	1.47232	1.10657	1.32321	1.47743	1.56142
Q818C9												0.34242	0.348263	-0.0071017	0.0699368	0.0151024	0.002491	-0.0167147	-0.348368	0.108157	-0.304393	-0.702282	0.971629	0.358244	0.999831	0.999319	0.999822	0.999689	0.945902	0.425591	0.453978	0.31267	0.000336556	0.061121	0.0137863	-0.0374174	-0.541756	0.326688	-0.442268	-0.0690765	-0.0117559	0.0259571	-0.142222	0.0613794	0.0412245	0.0364485	-0.0679111	0.0298729	-0.0250568
Q814C9									+	+	+	0.693872	1.26641	-0.145142	-0.0633907	0.0207189	0.0027504	0.512636	-0.0512129	1.11404	1.45915	1.62627	0.695607	0.110913	0.999831	0.999319	0.999822	0.999689	0.679446	0.994368	0.0132249	0.00166838	0.00293649	0.761705	-0.267445	-0.747573	0.318285	0.21211	0.221542	0.133808	-0.166699	-1.36714	-0.352424	-0.447312	-0.999162	-0.049531	-0.770712	-0.926487	-0.450222
Q81FQ0												0.277973	0.570973	-0.0322908	-0.147389	-0.178947	0.00340462	0.221012	0.283992	0.709906	0.40843	0.388423	0.979294	0.941225	0.999831	0.999319	0.999822	0.999689	0.883369	0.454818	0.00928356	0.0915508	0.483453	0.483669	-0.687412	-0.773837	0.205204	-1.12316	0.107019	-0.0752563	-0.540507	-0.260841	-0.388637	-0.272761	-0.275517	-0.534265	-0.528868	-0.412165	-0.444168
Q817W6												0.737826	0.38213	-0.140343	0.0155932	-0.191252	0.00414848	-0.286053	-0.447661	0.396898	0.0538451	0.158054	0.158192	0.381071	0.999831	0.999319	0.999822	0.999689	0.342846	0.152556	0.0205563	0.506015	0.922585	1.70081	1.58315	1.41918	0.631712	1.25498	1.03701	1.1688	1.1736	1.08215	1.07458	1.0659	0.899619	1.05723	1.20165	1.05593	1.12922
Q81EK9		+							+	+	+	-0.611211	-3.36652	-0.130779	0.0817038	0.117597	0.0043157	-0.155322	-0.789653	-3.202	-3.83156	-3.92935	0.379378	2.66e-07	0.999831	0.999319	0.999822	0.999689	0.941744	0.460658	1.25e-05	6.81e-07	1.65e-07	0.0271358	0.0754204	-1.07282	-3.93171	-1.56709	-4.44973	0.697496	0.26798	0.832787	0.958938	0.0769968	0.406554	0.868388	0.553526	0.464935	0.874107
Q81BI1		+										-0.25747	-2.05678	-0.0829563	-0.0153332	0.0249119	0.00436401	0.0312977	0.149676	-0.197559	-0.160489	0.799168	0.412065	1.83e-07	0.999831	0.999319	0.999822	0.999689	0.985985	0.838433	0.758635	0.847708	0.121106	-0.228088	-0.835266	-0.762998	-1.08068	-3.17624	-3.67972	-0.166008	-0.18262	0.22958	-0.29457	-0.147967	0.111182	0.0368319	-0.122335	-0.236069	-0.0799503
Q81A99												0.260248	-0.763845	0.0310879	0.0376689	-0.0634073	0.00470543	-0.0849215	0.0199305	0.0283349	-0.0508022	-0.498966	0.939319	3.17e-07	0.999831	0.999319	0.999822	0.999689	0.825833	0.888891	0.664799	0.903041	0.00186211	4.06257	4.09287	3.81613	3.1828	2.82126	2.18287	4.16149	4.09799	3.86624	4.01581	4.13463	4.10511	3.91958	4.00283	4.1598	3.93339
Q814J5										+		-0.183231	0.695157	-0.0419146	0.0503216	-0.00099055	0.00492541	0.257182	0.193675	-0.278669	-1.00236	-0.945422	0.0775031	0.421386	0.999831	0.999319	0.999822	0.999689	0.630647	0.365054	0.260656	1.76e-05	1.03e-06	0.609322	0.519655	0.680579	1.22018	1.20433	1.30786	1.07611	1.10502	1.11302	1.10873	1.12999	0.966247	1.23624	0.858448	1.1939	1.10431
Q81EI2												0.722375	0.510187	0.045318	0.0283025	0.00906754	0.00506274	-0.18579	-0.416712	-0.27279	0.195943	0.224085	0.134869	0.828337	0.999831	0.999319	0.999822	0.999689	0.509932	0.149356	0.254598	0.125166	0.816727	2.76062	2.32427	2.49236	1.91628	2.54923	1.76282	2.17822	2.00851	2.15829	2.25283	2.21056	2.05415	2.111	1.97824	2.18417	2.19349
Q819E3												0.0172609	0.847165	0.00535838	-0.0166461	0.0593421	0.00507355	-0.0223974	-0.112007	-0.332022	-0.190289	0.128808	0.379378	0.113378	0.999831	0.999319	0.999822	0.999689	0.931279	0.947495	0.17543	0.566542	0.808933	0.912098	0.614029	0.0131769	1.1065	1.1793	1.03086	0.795376	0.70091	0.92613	0.716622	0.885537	0.872893	0.789634	0.523701	0.902618	0.812925
Q81HE2		+										0.215362	-1.07619	-0.147008	-0.0785611	-0.0371253	0.00553131	-0.102819	-0.157443	-0.132776	-0.375051	-0.842905	0.810616	3.62e-10	0.999831	0.999319	0.999822	0.999689	0.711793	0.845522	0.72677	0.089825	1.7e-06	2.97147	2.99224	2.9478	1.72281	1.45297	1.14874	3.01944	3.07659	3.10429	2.92461	2.94082	2.93043	2.70651	2.95918	3.14242	2.96723
Q81G72												0.00259145	-0.557648	-0.064078	-0.0260557	-0.0262591	0.00583967	0.00076103	-0.265673	-0.5128	0.24177	0.709966	0.365308	2.74e-06	0.999831	0.999319	0.999822	0.999689	0.965488	0.565161	0.0277754	0.107646	0.00972045	1.80359	1.66371	1.65389	1.49761	0.975533	0.254974	1.96774	2.05807	2.0225	1.88251	2.05361	1.95652	1.98537	1.83459	1.99366	1.93987
Q817L7											+	0.00436783	0.654395	0.145656	0.0661583	0.0325375	0.00729434	0.0685056	0.13155	-0.354167	0.224837	2.39392	0.327139	0.56378	0.999831	0.999319	0.999822	0.999689	0.985985	0.539705	0.127233	0.104736	4.01e-12	1.86812	1.72606	1.8272	1.80349	2.28875	2.56685	2.0321	2.05575	2.25532	2.1081	2.37677	2.33183	2.22208	1.91162	2.25141	2.13746
Q814V3												0.390989	0.262347	0.0513706	-0.103255	-0.128468	0.00842031	-0.0394802	-0.247881	0.070104	-0.378007	-0.243674	0.839532	0.0719431	0.999831	0.999319	0.999822	0.999689	0.873091	0.494711	0.417021	0.0669341	0.0118571	3.04069	3.11531	3.14231	2.77515	2.88081	2.54407	3.07683	3.01433	2.96907	3.01502	3.03078	3.20512	2.68043	2.88261	3.03091	2.85309
Q81GC3		+							+	+	+	-0.2613	1.19401	-0.0449041	0.0346514	-0.0367552	0.00941722	0.116416	-0.0886428	-2.42345	-3.59997	-2.05141	0.00471638	2.86e-05	0.999831	0.999319	0.999822	0.999689	0.924184	0.958782	1.07e-14	1.74e-18	7.14e-15	5.31701	5.36698	5.51188	6.60817	6.56775	6.67352	6.02267	6.01545	5.87654	5.92744	5.83523	6.05384	6.10724	5.89016	5.86469	5.93765
Q814Q8												0.255905	0.316664	-0.0198046	0.00194932	-0.0279585	0.0096817	0.065122	0.164935	0.626773	0.427741	0.0275046	0.889654	0.115522	0.999831	0.999319	0.999822	0.999689	0.988682	0.31486	6.09e-05	0.00163	0.327592	2.47531	2.45075	2.32762	2.63258	2.1037	1.98733	2.43867	2.4089	2.57328	2.37901	2.49812	2.52088	2.42623	2.40726	2.4367	2.55002
Q81HM6		+							+	+		-0.663571	-1.62681	0.0504697	0.0130488	0.148788	0.00998751	0.313884	0.261597	-1.11762	-1.04331	-0.763373	0.11145	4.2e-06	0.999831	0.999319	0.999822	0.999689	0.849903	0.685405	0.0113705	0.0186637	0.0220634	-3.93872	-2.62508	-1.92751	-4.0166	-3.90802	-4.16877	-1.9716	-1.81272	-1.78138	-2.00963	-1.92324	-1.44487	-1.65991	-2.72917	-1.294	-1.83458
Q81A05								+	+	+	+	0.0743033	0.241755	0.0607109	0.115442	0.0170212	0.0101573	0.772027	1.50207	2.01135	1.77805	1.73011	0.453818	0.0740956	0.999831	0.999319	0.999822	0.999689	0.00301326	8.99e-09	1.18e-11	4.68e-11	1.49e-09	2.33175	1.93993	2.01376	2.26068	1.56963	2.24512	2.36425	2.28326	2.34991	2.39442	2.39661	2.42509	2.67398	2.17558	2.33767	2.44978
Q81E26												0.11047	-0.576567	-0.0897802	-0.0214818	0.113107	0.0106239	0.0569782	-0.0351028	-0.720512	-0.869008	-0.967271	0.853244	0.0138533	0.999831	0.999319	0.999822	0.999689	0.999859	0.991318	0.157534	0.0850332	0.0148824	-0.577564	-0.449009	-0.65916	-3.45258	-0.598823	-0.407799	-0.495819	-0.327691	-0.258739	-0.45424	-0.505263	-0.355525	-0.45268	-0.438097	-0.412443	-0.169428
Q81J37									+			-0.469904	-0.685578	-0.0844142	-0.239506	0.083821	0.010711	0.523324	0.670176	1.29155	0.918129	0.995584	0.0387617	1.87e-05	0.999831	0.999319	0.999822	0.999689	0.312249	0.0215929	7.74e-06	0.000313778	0.00233566	2.84152	2.82065	3.01498	1.96466	2.94761	2.4055	3.54067	3.78086	3.70023	3.3954	3.71455	3.69512	3.29764	3.02805	3.82102	3.64995
Q81E93		+								+	+	0.409729	-1.3222	-0.0691802	-0.0893307	-0.153545	0.0108465	-0.537668	-0.78042	-0.941736	-1.2256	-1.94644	0.839792	4.53e-10	0.999831	0.999319	0.999822	0.999689	0.051289	0.00489719	0.00012837	2.81e-06	5.64e-11	5.63142	5.30112	5.1398	3.50636	2.99934	3.65848	5.326	5.15349	5.29856	5.13566	5.35678	5.11463	5.11919	5.03888	5.19546	5.14311
Q81DU1		+										1.03457	1.85745	0.0857544	0.162764	-0.00779279	0.0112648	0.0373637	-0.301067	-0.105122	-0.297149	0.34352	0.0577326	9.14e-06	0.999831	0.999319	0.999822	0.999689	0.985985	0.624519	0.888511	0.391758	0.53747	0.963625	0.592676	0.710635	1.03912	1.20677	1.77733	-0.0133629	0.347438	-0.23595	0.00149822	0.244361	0.146091	-0.291842	0.145514	0.57622	-0.225924
Q81FS8											+	0.0957451	-0.567704	-0.06718	-0.297849	-0.210081	0.0118669	0.0747757	-0.0551701	-0.171483	0.542062	1.41293	0.648869	1.62e-05	0.999831	0.999319	0.999822	0.999689	0.985985	0.991318	0.664799	0.00815296	5.21e-06	3.19144	2.41395	2.43344	1.63347	1.5788	2.12385	3.04948	2.52159	3.11542	2.85808	2.73653	2.92691	2.72729	2.35343	2.55569	2.69798
Q81GN6												0.0609805	0.183775	0.0592702	-0.115283	-0.128248	0.0122019	0.143471	-0.0701154	-0.912238	0.40522	0.148891	0.660873	0.18279	0.999831	0.999319	0.999822	0.999689	0.956446	0.997301	0.00419425	0.0871663	0.922585	0.693161	-0.163015	-0.11472	0.151449	-0.170976	0.0909786	0.584431	0.356456	0.226492	0.605176	0.394839	0.381736	0.596263	-0.278229	0.34697	0.647512
Q81A16		+								+	+	0.668725	1.1464	-0.0668119	0.000506717	-0.143329	0.0126591	0.345982	0.478626	0.99928	1.10422	1.14101	0.210119	0.00148342	0.999831	0.999319	0.999822	0.999689	0.405645	0.0169999	1.84e-06	2.84e-07	7.27e-06	1.61733	1.30799	1.1811	1.70771	1.69448	1.4249	1.06802	0.789594	1.17752	0.959077	1.06517	0.847018	1.02851	0.866367	0.98525	0.902775
Q81G76		+							+	+	+	0.13168	-1.49745	0.0361004	-0.102289	-0.591595	0.0129083	-0.139695	-0.00875918	-2.66073	-2.97989	-2.97103	0.842755	5.38e-06	0.999831	0.999319	0.999822	0.999689	0.906801	0.965059	2.08e-07	2.33e-08	5.66e-09	-1.08538	-1.34915	-1.17354	-4.00047	-3.16576	-2.04157	-0.921186	-0.959292	-1.18773	-0.85439	-1.02068	-1.04828	-0.854451	-1.47373	-1.20341	-1.0563
Q81I71		+							+	+		0.669147	-3.13397	-0.00824483	-0.0507075	-0.0913544	0.0138607	-0.0609779	0.225805	1.02693	1.05547	1.06774	0.750764	6.84e-08	0.999831	0.999319	0.999822	0.999689	0.974068	0.833391	0.0403525	0.0335714	0.0957575	0.537432	0.921606	0.809823	-1.10962	-4.49853	-4.24471	0.222683	0.458831	0.514801	0.252225	0.628263	0.327655	0.158156	0.267805	0.461706	-0.0568123
Q81AS8									+	+	+	-1.29965	-0.564361	-0.0569013	-0.211683	-0.251492	0.0142148	0.190529	0.128724	2.04578	3.1017	2.98793	0.071568	0.0555761	0.999831	0.999319	0.999822	0.999689	0.974068	0.91641	0.000935458	5.93e-06	3.52e-05	-4.28289	-3.14709	-4.80697	-2.91308	-3.76483	-4.06553	-1.54464	-2.92091	-2.93756	-2.53718	-2.28335	-2.71672	-1.78944	-3.26108	-3.14417	-1.70001
Q812W6												0.0137285	-0.470742	-0.0157204	0.0605602	0.033795	0.0150146	0.301736	0.15183	0.202258	0.642118	1.10282	0.858598	0.130627	0.999831	0.999319	0.999822	0.999689	0.941744	0.921813	0.719362	0.298768	0.187507	-0.985212	-0.268871	-0.350934	0.177538	-4.26166	0.313332	-0.350645	0.00993824	-0.370602	-0.2534	-0.299685	-0.168822	-0.49509	-0.0138512	-0.177212	-0.156076
Q81D92		+							+	+		-0.599063	-4.35323	-0.0329628	0.0742302	0.111313	0.0150375	0.0764287	-0.00402451	-2.23335	-2.79731	0.508542	0.17358	6.56e-12	0.999831	0.999319	0.999822	0.999689	0.990507	0.967735	1.8e-05	4.9e-07	0.460416	2.06693	2.01376	2.05945	-0.266846	-3.15301	-2.41486	2.97464	2.81475	3.08283	2.70807	3.04626	3.05555	3.17048	2.94745	2.82045	2.95588
Q81A00		+										0.467687	-1.04303	-0.00203705	0.0242685	0.0179393	0.0150496	0.178968	0.428386	0.632121	0.263828	0.418009	0.580082	5.44e-12	0.999831	0.999319	0.999822	0.999689	0.738541	0.00440662	1.71e-05	0.0157372	0.0890012	1.84842	1.6774	1.70239	0.100716	-0.315072	0.198076	1.55197	1.55123	1.65685	1.47589	1.52609	1.78852	1.49277	1.54267	1.64089	1.62881
Q81A06									+			-0.155858	-0.752989	0.0348218	-0.141564	0.001894	0.0154864	0.512246	0.748922	1.0752	0.775831	0.500032	0.0335611	8.35e-10	0.999831	0.999319	0.999822	0.999689	0.032249	2.44e-05	2.05e-08	1.66e-06	0.0314629	0.814087	0.949522	1.06497	0.359669	0.144328	-0.179167	1.435	1.32036	1.47569	1.41927	1.53445	1.41835	1.34489	0.959562	1.34538	1.52171
Q819H7										+	+	-0.0722968	0.131753	0.048392	0.009456	0.0530326	0.0158666	0.190468	0.00765673	0.313606	1.17291	1.35289	0.117193	0.0096424	0.999831	0.999319	0.999822	0.999689	0.768504	0.872423	0.0205047	1.26e-08	4.28e-08	3.51594	3.12457	3.29933	3.50406	3.01854	3.31704	3.82995	3.43927	3.82241	3.77799	3.69988	3.79551	3.83534	3.43969	3.68845	3.80793
Q812N8		+										0.462051	-2.51233	-0.186467	-0.0321337	-0.1251	0.0160866	-0.00638962	-0.483636	-0.243842	-0.444829	-0.842827	0.873512	4.89e-09	0.999831	0.999319	0.999822	0.999689	0.982842	0.501347	0.65973	0.329517	0.00880902	0.197624	0.31514	0.522569	-2.17199	-4.32459	-2.10357	-0.151127	0.411624	0.323576	-0.374784	0.205028	0.23099	0.055089	0.13681	0.139248	-0.105444
Q81HK1		+							+	+	+	-0.195946	-1.07924	-0.0582186	0.0264257	-0.0368621	0.0165914	0.042949	-0.142378	-1.3658	-1.4427	-1.68523	0.595471	0.000876833	0.999831	0.999319	0.999822	0.999689	0.991494	0.958782	0.00729897	0.00481552	0.000273131	-0.459793	-0.750864	-0.72296	-0.748678	-3.62393	-0.923262	-0.139664	-0.26901	-0.00221252	-0.084281	-0.254375	-0.210324	-0.0371218	-0.257349	-0.193663	0.023035
Q819Z0											+	-0.236036	0.348921	-0.243148	0.220847	0.14409	0.0166957	0.755891	0.620857	0.904084	0.377374	1.10547	0.154575	0.408897	0.999831	0.999319	0.999822	0.999689	0.0638652	0.0292914	0.000364216	0.0679246	0.000572511	2.31434	1.89944	2.41535	2.25887	2.41181	3.00095	2.38667	2.9596	2.92587	2.56262	2.61087	2.40576	2.93172	3.05349	2.79294	2.74577
Q817B7									+	+	+	0.195883	0.400838	-0.0293865	0.09758	-0.057764	0.0167433	-0.101096	-0.696709	-1.37353	-1.64355	-2.31447	0.853244	0.562718	0.999831	0.999319	0.999822	0.999689	0.868757	0.0606008	1.94e-05	1.13e-06	3.25e-10	2.5619	3.61598	3.56726	3.39288	3.57009	2.68468	3.44478	3.51275	3.13486	3.30548	3.42657	3.30874	3.29444	3.5062	3.42796	3.41352
Q81F01		+										0.072998	-2.22592	0.0458972	0.0525354	0.127967	0.0167561	0.21759	0.109109	-0.932626	-0.93186	-0.750474	0.677029	9.12e-11	0.999831	0.999319	0.999822	0.999689	0.88073	0.79746	0.00316439	0.00339342	0.00167366	0.345774	0.61372	0.299247	-2.90998	-2.14447	-1.29593	0.859276	0.584897	0.530468	0.812953	0.657784	0.678157	0.849336	0.541145	0.585241	1.00163
Q815I8		+										0.559985	-2.45717	-0.0171553	0.118699	-0.162172	0.0169627	-0.199907	-0.549953	-0.265867	0.246972	0.540593	0.753439	4.99e-09	0.999831	0.999319	0.999822	0.999689	0.824717	0.407098	0.613993	0.381532	0.341763	0.156574	-0.0253201	-0.0401602	-1.96731	-4.28498	-3.42044	-0.162697	-0.197551	-0.293718	-0.28288	-0.227023	-0.158967	-0.316539	-0.108204	-0.0296516	-0.205282
Q81H77		+										0.203506	-2.09408	-0.0661583	-0.0916042	-0.0696882	0.0181414	0.15079	-0.152584	0.116807	0.148375	0.374797	0.939319	8.21e-07	0.999831	0.999319	0.999822	0.999689	0.980782	0.954211	0.696511	0.612753	0.676221	0.236485	0.187471	0.110723	-1.44639	-4.18188	-1.44216	0.440857	-0.010541	0.428738	0.21466	0.208997	0.273484	0.389386	0.0493603	-0.0110302	0.277763
Q81F26		+							+	+	+	0.0215747	-2.74529	-0.0271969	-0.192446	-0.123658	0.0182648	0.192352	-0.358017	-1.03583	-1.42537	-2.13995	0.609575	2.39e-12	0.999831	0.999319	0.999822	0.999689	0.915364	0.526999	0.00101916	2.08e-05	3.23e-09	0.892353	0.693558	0.485152	-1.82498	-2.84568	-2.27124	1.09645	0.993094	0.851692	1.01896	0.90754	0.969707	1.01258	0.377697	0.817099	0.911871
Q81JA7	+	+										-1.0214	-1.86016	0.033378	0.0787856	0.177171	0.0189978	-0.252345	-0.0664279	-0.0442645	-0.414188	-0.318011	0.0153767	1.74e-07	0.999831	0.999319	0.999822	0.999689	0.756157	0.998719	0.957379	0.354801	0.176324	-3.7687	-2.28921	-1.66804	-3.52702	-3.91208	-3.5155	-1.48583	-1.01548	-1.22554	-1.31205	-1.20392	-1.0742	-1.46857	-1.19613	-0.982332	-1.00275
Q81E05									+	+	+	1.08382	-0.136505	0.0567614	0.762047	-0.445836	0.0190833	-0.194049	0.764673	3.5066	2.1347	3.65196	0.65474	0.396424	0.999831	0.999319	0.999822	0.999689	0.956446	0.574103	0.000122678	0.00951107	0.000160729	-1.85237	-4.90615	-3.63364	-4.04305	-4.88173	-5.8407	-3.44586	-4.45742	-4.80544	-3.63784	-4.06964	-4.79439	-4.17792	-3.24083	-3.16035	-3.98156
Q816F7		+										-0.0186679	-1.65172	0.132814	0.309208	0.160091	0.0206655	0.0972627	0.163431	-0.312566	-0.333927	-0.125577	0.384169	7.32e-11	0.999831	0.999319	0.999822	0.999689	0.981289	0.544382	0.266475	0.242013	0.168157	-1.60877	-1.99796	-2.25742	-3.99444	-3.51271	-3.9685	-1.42006	-1.91929	-1.53391	-1.40956	-1.66449	-1.36419	-1.31257	-1.56864	-1.22095	-1.46618
Q81CB3									+		+	-1.05361	-0.728465	0.235845	0.0270284	0.287506	0.0211633	0.185326	-0.0376091	-1.80243	-1.19179	-2.34328	0.140184	0.0314645	0.999831	0.999319	0.999822	0.999689	0.980782	0.991318	0.00562453	0.0653467	0.000159402	-5.13153	-3.46533	-3.2113	-3.70012	-3.26518	-4.57978	-2.40058	-3.09624	-2.21562	-2.55357	-2.3417	-2.07306	-2.55112	-2.78426	-2.4525	-1.97239
Q81EH9									+	+	+	-0.58552	-0.826903	-0.0116711	0.04927	0.0203991	0.0215543	0.0272287	-0.0720317	-2.86677	-3.5179	-2.91146	0.107624	0.000429659	0.999831	0.999319	0.999822	0.999689	0.985985	0.997301	2.92e-08	4.37e-10	3.32e-09	-0.637487	-0.395237	-0.013299	-0.442507	-2.10902	0.0689983	0.586195	0.357709	0.701527	0.485465	0.54029	0.621224	0.66944	0.520187	0.447088	0.526131
Q81I61									+	+	+	-0.165988	-0.92218	0.0261898	0.0891533	0.0328178	0.0215988	0.151294	-0.0264155	-1.53901	-1.8928	-1.80284	0.106395	1.79e-08	0.999831	0.999319	0.999822	0.999689	0.918462	0.956373	3.25e-08	4.74e-10	8.9e-11	1.51095	1.90026	2.14233	1.13777	0.246114	1.18873	2.27505	2.38868	2.32267	2.26101	2.35234	2.48818	2.39771	2.25778	2.44185	2.42643
Q817Z4								+	+	+	+	0.67225	-0.954449	-0.0494963	-0.101604	-0.123123	0.0220941	0.701441	1.02606	1.84152	1.36598	1.18504	0.453818	2.35e-06	0.999831	0.999319	0.999822	0.999689	0.13273	0.00124034	8.32e-08	5.14e-06	0.000519089	-0.679848	-0.543425	-0.984794	-3.12293	-2.88888	-1.78871	-0.909285	-1.18976	-1.19088	-1.0901	-1.32752	-0.984225	-1.30844	-1.48382	-0.958998	-1.22222
Q81GN9		+							+	+	+	0.450429	-2.2332	-0.108241	0.132232	0.0387967	0.0223204	0.0879307	-0.063612	-2.70694	-3.61253	-3.3345	0.880386	1.05e-08	0.999831	0.999319	0.999822	0.999689	0.985985	0.998719	4.79e-08	1.66e-10	1.77e-10	0.0183849	-0.866982	-1.22919	-3.50126	-3.74124	-3.59852	-0.631924	-1.13789	-0.72436	-0.723105	-1.14743	-0.911805	-0.579768	-0.942362	-0.731874	-0.853825
Q81F81		+							+			-0.978353	-2.78693	0.0761522	-0.00164159	0.23394	0.0223675	0.427769	0.104823	-1.40383	0.194251	-0.103718	0.0199752	6.41e-10	0.999831	0.999319	0.999822	0.999689	0.671507	0.870201	0.000801311	0.464289	0.459782	-1.60009	-2.20345	-3.05763	-3.93772	-4.97914	-4.08239	-0.879045	-1.20058	-0.911594	-1.01929	-0.996402	-0.710504	-0.439733	-1.23497	-1.47796	-0.51861
Q81BJ8		+							+		+	0.384831	-2.96887	-0.0179176	0.00918706	0.136566	0.0225703	-0.0656528	-0.35582	-1.39005	-0.49188	-1.55973	0.951622	1.08e-09	0.999831	0.999319	0.999822	0.999689	0.956446	0.737859	0.00187722	0.300742	0.000106748	-0.618351	-1.33647	-1.06413	-4.70113	-4.68101	-4.41029	-1.15219	-1.39896	-0.687407	-1.19196	-1.12001	-0.943782	-1.13684	-1.17836	-1.05232	-1.23686
Q81FS2		+										0.479079	1.2134	0.00919088	-0.151118	-0.124541	0.0229848	0.0301476	0.166098	0.335	0.394009	0.890621	0.575251	5e-05	0.999831	0.999319	0.999822	0.999689	0.981289	0.29228	0.0085297	0.00229167	2.63e-05	0.112413	-0.0803318	-0.0221605	0.450272	0.334111	0.71616	-0.119562	-0.233476	-0.139383	-0.0797224	-0.173001	-0.175563	-0.30812	-0.483198	-0.310982	-0.19767
Q81HA4									+	+	+	-0.0366052	-0.988705	-0.038243	-0.0185026	-0.0245902	0.0236244	-0.154453	-0.615426	-1.50935	-2.25287	-2.98212	0.750115	0.00309209	0.999831	0.999319	0.999822	0.999689	0.929607	0.515762	0.00631322	0.000114506	6.36e-07	-0.385942	-0.0422859	-0.0550547	-1.33175	-1.32354	-1.39665	-0.00215912	0.400413	0.163174	-0.124179	0.235187	0.372252	-0.225039	0.353434	0.221001	-0.162031
Q81JD4		+										0.529202	-1.80096	0.0234699	0.0752722	0.0167917	0.0237249	0.138618	0.439267	0.889341	0.58474	0.281891	0.707537	2.72e-09	0.999831	0.999319	0.999822	0.999689	0.96099	0.199776	0.00141868	0.0205015	0.733944	1.16789	0.965252	1.01635	-1.91917	-2.16543	-0.468773	0.947155	0.845626	0.703997	0.921718	0.816251	0.865781	0.810082	0.68634	1.06965	0.982019
Q817F9										+	+	-0.274791	-0.694131	-0.0816307	0.0972665	0.228693	0.0238063	0.165321	-0.193014	-0.0756601	1.21861	1.43554	0.0471714	3.85e-07	0.999831	0.999319	0.999822	0.999689	0.890797	0.790178	0.967806	2.5e-07	4.45e-07	1.46398	2.01788	2.25652	1.06578	1.20993	1.49231	2.48917	2.37099	2.6375	2.51042	2.28399	2.49492	2.67632	2.33616	2.62045	2.67846
Q81JD0												0.14223	0.190488	0.0402273	0.0170765	-0.0361169	0.0240332	-0.104317	-0.166316	-0.114475	-0.299615	-0.384135	0.584033	0.0173867	0.999831	0.999319	0.999822	0.999689	0.630647	0.777283	0.76994	0.141757	0.000576675	1.43273	1.36894	1.1804	1.25471	1.28141	0.878359	1.45378	1.52803	1.50846	1.50409	1.53488	1.60854	1.50757	1.24353	1.63387	1.59994
Q817R7									+	+	+	0.871056	-0.331043	-0.185472	0.457879	-0.17407	0.0242634	0.24582	0.0624905	1.565	1.8886	2.42034	0.471014	0.0349443	0.999831	0.999319	0.999822	0.999689	0.924184	0.928091	0.000413484	4.17e-05	7.4e-06	-1.89557	-2.97805	-2.45281	-4.10718	-3.70111	-3.83678	-3.20267	-2.9766	-2.82543	-3.82038	-3.21535	-2.48882	-2.86043	-2.55635	-2.3708	-3.77497
Q81G07		+							+	+	+	0.0157464	-1.74792	-0.0827223	0.124628	0.0592105	0.0244083	0.00572014	-0.0268052	-2.02883	-2.22366	-1.80294	0.669414	1.28e-07	0.999831	0.999319	0.999822	0.999689	0.984135	0.979638	2.53e-06	4.95e-07	1.79e-06	-1.5326	-1.57692	-1.57945	-4.25494	-2.72037	-3.71702	-1.2929	-1.46082	-1.0476	-1.26457	-1.382	-1.36635	-1.04607	-1.22179	-1.3161	-1.1145
Q81IS3								+	+	+	+	0.163177	-0.960002	-0.0746714	0.069322	-0.0525042	0.0246557	0.359426	1.05919	1.75874	1.48558	1.0035	0.638446	8.86e-11	0.999831	0.999319	0.999822	0.999689	0.261317	2.23e-07	7.52e-12	6.82e-11	5.06e-06	3.09831	2.96665	2.95497	1.99157	1.45225	1.49421	3.14505	3.233	3.08725	3.07584	3.14327	3.05874	3.1042	3.24949	3.16305	3.29839
Q81E85												-0.0373306	-0.562326	-0.0256068	0.0011355	0.0843646	0.0246976	-0.0677706	-0.111917	-0.548747	-0.712477	-0.491653	0.194615	2.87e-07	0.999831	0.999319	0.999822	0.999689	0.813248	0.941172	0.00732981	0.000651612	0.000382656	1.14578	1.24859	1.23003	0.785763	0.123954	0.427334	1.46533	1.44847	1.75748	1.57118	1.52053	1.53932	1.60446	1.3444	1.5693	1.54254
Q814M4												0.0683956	0.96158	0.0448939	0.0333761	0.15935	0.0251439	0.241206	-0.143903	-0.633516	0.127058	0.107032	0.2949	0.00379936	0.999831	0.999319	0.999822	0.999689	0.530044	0.827591	0.000241802	0.140959	0.623762	1.59043	1.69081	1.74868	2.18939	2.36857	2.43915	1.9558	1.85948	1.94435	2.00279	2.00883	1.91925	1.87329	1.8557	1.97425	1.94814
Q818B4		+							+	+	+	-0.501079	-3.18696	-0.111254	-0.0242335	0.0191631	0.0254466	0.144871	-0.247569	-3.51537	-2.94	-1.42358	0.330236	2.1e-08	0.999831	0.999319	0.999822	0.999689	0.981289	0.902074	1.4e-07	2.1e-06	0.00233129	-0.903452	-1.44449	-0.665444	-4.75433	-3.61528	-3.41379	-0.209753	-0.433347	0.0678444	-0.211272	-0.329614	-0.331569	0.0539541	-0.398932	-0.459503	-0.0601959
Q814J9		+										0.745875	-2.04185	-0.29626	-0.0112832	0.018961	0.0263017	-0.366547	0.0158793	0.21095	-0.108428	-0.785913	0.703032	2.51e-05	0.999831	0.999319	0.999822	0.999689	0.791564	0.96413	0.6324	0.95786	0.0803642	-1.2956	-2.30756	-1.717	-6.31429	-4.26644	-3.81497	-2.07392	-3.29731	-1.25166	-2.27565	-2.37028	-2.82917	-2.09584	-2.46057	-2.25686	-2.10909
Q81FQ1		+										-0.136723	-1.18294	0.0591043	-0.0235596	0.0699005	0.0267728	0.22746	-0.00226847	-0.576752	-0.126644	-0.419267	0.351627	6.33e-07	0.999831	0.999319	0.999822	0.999689	0.870751	0.949646	0.0741968	0.874367	0.0378812	1.3877	1.47112	1.71113	0.921085	-0.0721102	-0.130054	2.04374	1.78245	2.08881	2.04052	1.92545	2.1629	2.10136	1.79627	1.79016	2.16603
Q81GN1		+										0.346043	-2.46623	0.00767517	0.0380084	0.0519447	0.0271619	-0.32678	-0.362842	-0.298552	-0.680091	-0.93763	0.982903	2.23e-10	0.999831	0.999319	0.999822	0.999689	0.589378	0.61483	0.483385	0.0593414	0.000980089	0.00113678	0.839632	0.923661	-2.40302	-1.79774	-3.18397	0.645281	0.643813	0.372103	0.414834	0.699939	0.606011	0.270715	0.552519	0.795464	0.42186
Q81AI2									+		+	-0.406947	-0.0358117	-0.00571378	0.128938	0.218857	0.0283807	0.0373262	0.135599	1.34785	0.844489	1.64903	0.0124162	0.00287048	0.999831	0.999319	0.999822	0.999689	0.985985	0.541667	4.6e-08	2.54e-05	1.75e-08	1.74138	1.74104	1.57267	2.01053	1.37149	2.07413	2.40738	2.40494	2.39852	2.3511	2.48218	2.39698	2.54082	2.32939	2.57092	2.61617
Q817A5		+							+	+	+	-0.452305	-1.02768	0.193418	0.214335	-0.169854	0.0287132	0.202889	-0.166735	-2.6326	-2.73646	-2.42488	0.300633	0.000697875	0.999831	0.999319	0.999822	0.999689	0.945902	0.947495	2.19e-06	1.01e-06	1.45e-06	-2.37424	-2.36586	-2.17928	-4.44598	-2.73971	-2.17216	-1.20633	-1.69804	-1.72321	-1.23014	-1.3206	-1.46001	-1.03847	-1.81614	-1.28648	-0.946354
Q81DY6		+										0.0886033	-2.51357	-0.15109	-0.210485	-0.326462	0.0288099	0.291925	-0.180765	0.339892	0.405158	-0.879843	0.82317	4.82e-08	0.999831	0.999319	0.999822	0.999689	0.890797	0.941172	0.353584	0.258957	0.0161376	-0.856955	-1.23286	-1.33146	-3.74224	-2.71909	-5.47884	-0.642193	-1.00535	-1.10465	-1.09606	-1.03569	-1.03715	-0.80321	-1.6288	-1.10817	-0.655399
Q81EM1		+							+	+	+	0.084699	-3.51837	0.0274633	-0.103818	-0.257613	0.0307922	-0.382626	-0.749838	-1.70778	-1.89734	-1.85969	0.858245	1.17e-08	0.999831	0.999319	0.999822	0.999689	0.76839	0.409169	0.00304719	0.00114857	0.000382656	0.886158	1.17484	1.15976	-4.41671	-0.799993	-3.0841	1.30211	1.53576	1.06368	1.12413	1.55969	1.33669	1.01634	0.965057	1.45218	1.13576
Q81GW5		+										0.272408	-2.73508	-0.0113614	0.0142415	0.0823975	0.0312608	-0.0619545	-0.379833	-0.0787023	0.0613372	-0.729935	0.990865	1.41e-07	0.999831	0.999319	0.999822	0.999689	0.971684	0.790618	0.983027	0.790004	0.0674168	0.821943	0.0949516	0.330741	-1.41713	-4.71695	-2.35311	0.588976	0.40092	0.375412	0.495847	0.400109	0.471829	0.471166	0.285585	0.494757	0.688915
Q814J7								+	+	+	+	0.562077	-0.0656401	-0.110151	-0.0735798	-0.257657	0.0313447	0.89984	1.31351	2.221	1.87995	1.76371	0.603371	0.00907439	0.999831	0.999319	0.999822	0.999689	0.00989561	1.08e-05	3.55e-10	3.56e-09	1.65e-07	0.235344	-0.447039	-0.57215	-1.31395	-1.42874	-0.636669	-0.481356	-0.772779	-0.281048	-0.650636	-0.5474	-0.631036	-0.608716	-0.683825	-0.619905	-0.635998
Q817H0		+										0.997608	-1.13296	0.354003	0.156442	-1.36595	0.0315183	-1.00489	0.0578391	-0.181011	-0.390822	0.578298	0.543573	0.00387367	0.999831	0.999319	0.999822	0.999689	0.308422	0.951922	0.854506	0.59074	0.501232	-0.552137	-0.944742	-0.917996	-3.80461	-2.86042	-2.85391	-1.20372	-1.36906	-1.90002	-1.14009	-1.12406	-1.11009	-1.27097	-1.78837	-1.10066	-1.1341
Q818B0									+	+		0.263081	0.562199	0.0205275	-0.00597763	0.159897	0.0316111	0.0309868	-0.124058	-1.50709	-1.93818	-0.533394	0.936359	0.944682	0.999831	0.999319	0.999822	0.999689	0.984135	0.919115	2.3e-08	1.33e-10	0.000438782	0.436863	0.0670815	-0.0540571	0.411316	-0.0775366	0.301104	0.0602303	0.37453	0.160778	0.231942	0.313817	0.147923	-0.0138083	0.0571899	0.377699	0.175863
Q818F8												0.0784874	0.660313	0.0446599	0.0255985	0.0536722	0.0323747	0.093626	-0.0652955	-0.657637	-0.526766	-0.136103	0.603371	0.600552	0.999831	0.999319	0.999822	0.999689	0.98304	0.998719	0.00872631	0.0412832	0.151571	-0.487669	-0.703882	-0.928441	0.154697	-0.315919	-0.925652	-0.489449	-0.411698	-0.519413	-0.388297	-0.413407	-0.448314	-0.316522	-0.752579	-0.431189	-0.409607
Q819P8												0.165141	-0.039285	-0.0137088	-0.0233402	0.0378323	0.0326602	0.018596	-0.0707391	-0.0202459	-0.383973	0.0806325	0.729736	0.00370164	0.999831	0.999319	0.999822	0.999689	0.981289	0.993863	0.829824	0.122471	0.637279	0.86849	0.826742	0.998986	0.736639	-0.119376	0.751322	0.898888	1.13823	1.09657	0.931542	1.10063	1.09695	0.991534	0.929377	0.986235	1.01066
Q813N0												0.213236	-0.588195	0.142874	0.0076828	0.0143121	0.0329278	0.159246	0.2161	0.915937	0.927072	0.892565	0.853244	1.01e-05	0.999831	0.999319	0.999822	0.999689	0.92163	0.430521	9.83e-05	6.51e-05	0.00250492	-0.148138	0.0860558	0.237926	-1.58164	-1.06585	-0.293318	0.148588	0.235044	0.0873966	0.446486	0.153148	0.336577	0.160968	-0.0804806	0.257065	0.239859
Q81FR0		+							+	+	+	-0.191909	-2.96797	-0.0341199	-0.0209738	-0.0821609	0.0329959	0.102016	-0.141974	-2.38276	-3.33626	-3.40887	0.0463139	3.67e-17	0.999831	0.999319	0.999822	0.999689	0.97094	0.868872	8.14e-13	4.16e-16	3.69e-17	4.05966	4.29853	4.4914	1.52633	0.944249	1.33849	4.887	4.74013	4.73309	4.80705	4.87083	4.61653	4.76578	4.58994	4.78505	4.63662
Q81FP9		+							+	+	+	-0.574376	-3.95166	0.00772412	0.0910409	0.0771472	0.0330156	0.1115	-0.0141017	-2.32948	-3.05062	-2.54236	0.328176	3.19e-09	0.999831	0.999319	0.999822	0.999689	0.985985	0.983828	0.000176433	4.16e-06	1.59e-05	1.39314	2.16304	2.37047	-1.53829	-3.42908	0.0497952	2.87065	2.82557	2.88845	2.80716	2.92436	2.91289	2.92488	2.63462	3.14177	2.85909
Q81EY8												0.591756	-0.362049	-0.0180054	-0.0455666	0.0126533	0.0335623	-0.241967	-0.601706	-0.571126	-0.553349	-0.20768	0.58726	0.000649295	0.999831	0.999319	0.999822	0.999689	0.595122	0.113439	0.0488325	0.0618643	0.130664	2.06206	1.68183	1.6077	-0.20104	1.22031	0.758553	1.53202	1.46248	1.51672	1.55118	1.52454	1.41805	1.30592	1.35723	1.55484	1.49942
Q816W1												-0.568208	-0.581585	-0.267185	-0.135243	-0.0144634	0.0335776	0.113272	-0.0506026	-0.133673	-0.129119	-0.273807	0.453818	0.0757266	0.999831	0.999319	0.999822	0.999689	0.985985	0.997301	0.927283	0.943813	0.502515	-4.19733	-1.75871	-1.73181	-1.56944	-4.98985	-1.88105	-2.26096	-1.46038	-1.32699	-2.06525	-1.85198	-1.8961	-2.06331	-1.76907	-1.77821	-1.83559
Q81BN2		+							+	+	+	-0.016908	-1.15693	0.0848052	-0.0445627	0.0316976	0.0339718	0.131639	0.144783	-2.60675	-3.56184	-3.36425	0.763472	0.00134162	0.999831	0.999319	0.999822	0.999689	0.984135	0.888891	2.12e-05	1.4e-07	1.11e-07	0.186495	-0.40847	-0.614148	-0.0645657	-2.88701	-2.01699	0.344856	-0.00798321	-0.187378	0.213603	0.0649672	0.161902	0.389087	-0.346287	-0.183517	0.330608
Q81GC1		+										-0.310881	-1.87506	0.0393683	0.23981	0.00234032	0.0347811	0.0537567	0.469045	0.54623	0.205334	-0.416011	0.27953	8.59e-08	0.999831	0.999319	0.999822	0.999689	0.998012	0.312398	0.0834828	0.420386	0.094194	-1.67746	-1.93731	-0.578609	-2.74121	-4.10959	-2.74747	-1.02695	-0.662419	-0.636473	-0.630155	-0.762479	-0.778544	-0.712607	-0.508923	-0.541409	-0.613848
Q81J40												-0.109722	-0.926506	-0.123555	-0.0408923	-0.041446	0.0348345	0.531368	0.680255	0.921469	0.591389	0.419683	0.384169	5.8e-06	0.999831	0.999319	0.999822	0.999689	0.364115	0.0352886	0.000978465	0.0187666	0.405068	3.13807	2.20399	2.14892	1.74145	1.11366	1.47317	3.03447	2.85415	2.86643	2.80811	2.93369	2.67913	2.7006	2.66031	3.11492	2.94257
Q817S6		+										0.137637	-1.37127	-0.0657813	-0.0351632	0.0849469	0.0352809	0.0281633	0.208843	-0.463353	-0.522109	-0.720855	0.839792	7.29e-06	0.999831	0.999319	0.999822	0.999689	0.985985	0.731196	0.289856	0.229163	0.0174383	-1.09486	-1.8738	-2.35639	-3.07549	-4.0448	-3.44385	-1.10745	-2.02812	-1.6675	-1.37818	-1.84119	-1.74447	-1.17747	-1.86467	-2.02294	-1.33
Q81CI8									+	+	+	-0.127419	-0.807735	0.0513859	-0.0788345	-0.201038	0.0356305	0.0550836	-0.680513	-2.36635	-2.94599	-1.23801	0.673422	0.00837848	0.999831	0.999319	0.999822	0.999689	0.999859	0.45564	7.23e-05	2.93e-06	0.00740654	-1.20892	-2.20656	-3.16534	-3.42067	-2.15647	-3.75698	-1.46327	-2.01329	-1.78711	-1.6393	-1.73791	-1.69574	-1.51424	-1.87646	-2.266	-2.44111
Q81AK8		+							+	+	+	-0.342377	-2.36435	-0.0110111	0.115587	0.0743357	0.0357176	0.193092	0.0756829	-1.93324	-2.42237	-1.22229	0.0154058	4.79e-15	0.999831	0.999319	0.999822	0.999689	0.802684	0.704964	1.12e-10	7.68e-13	1.27e-08	6.39725	6.42296	6.5434	4.35384	4.39633	3.83514	7.14835	7.0656	7.11167	7.00271	7.12698	7.19947	7.30314	7.10394	7.10879	7.11831
Q81J42									+			-0.447849	0.0401745	-0.126835	-0.0430126	0.0210292	0.0358493	0.629904	0.704627	1.16685	0.924561	0.928565	0.0376605	0.0356097	0.999831	0.999319	0.999822	0.999689	0.149748	0.0122137	1.81e-05	0.000202944	0.00357691	2.89168	3.13418	3.27957	3.55921	3.30052	3.19742	3.76278	3.86096	3.96013	3.5963	4.0064	3.63724	3.40299	3.8232	4.07213	3.61712
Q819Z6		+							+	+	+	-0.0740979	-2.91993	-0.032952	-0.0202503	-0.0704002	0.0361354	-0.00534121	-0.441725	-2.83086	-3.50336	-4.01401	0.58726	9.91e-11	0.999831	0.999319	0.999822	0.999689	0.981289	0.519525	1.67e-08	1.92e-10	3.3e-12	1.70678	1.89056	2.25337	0.214359	-1.94153	-1.67197	2.30044	2.32745	2.38	2.31595	2.22898	2.40067	2.3253	2.2229	2.24241	2.44926
Q817E6												0.113322	-0.811809	0.0156784	0.0529995	0.0237128	0.0362053	0.119795	-0.330435	0.238263	0.510811	0.460718	0.660054	5.66e-07	0.999831	0.999319	0.999822	0.999689	0.965844	0.45704	0.172768	0.00966362	0.208111	0.112795	0.606195	0.442504	-0.29884	-0.531671	-1.49574	0.623655	0.498874	0.633894	0.536824	0.669183	0.634013	0.55721	0.536995	0.664692	0.661016
Q81C44										+	+	0.690856	-0.727375	-0.18126	0.0537478	0.108803	0.0364037	-0.159833	-0.0668869	0.941776	1.26152	1.51984	0.379378	8.91e-06	0.999831	0.999319	0.999822	0.999689	0.741659	0.998719	0.000245425	5.47e-06	5.83e-06	-0.94001	-1.28393	-1.40843	-3.47578	-3.07522	-2.04842	-1.59906	-1.57225	-1.59873	-1.75618	-1.69843	-1.82265	-1.56376	-1.63628	-1.56529	-1.37614
Q813T5		+								+	+	-0.320493	-3.65946	-0.180291	0.17197	-0.114739	0.036911	0.145404	-0.109367	-1.20654	-1.51708	-2.922	0.609575	6.63e-08	0.999831	0.999319	0.999822	0.999689	0.984135	0.990367	0.0595902	0.0187506	1.05e-05	0.410431	-0.721735	-0.916867	-4.58998	-3.8883	-3.47917	0.580803	-0.137259	0.224659	0.568328	-0.315686	-0.0887499	0.960458	0.121731	-0.0545998	0.528667
Q81DH4									+	+	+	-0.298646	-0.138093	0.105693	-0.0181745	-0.0735938	0.0372581	0.0224934	0.0990327	-3.92648	-4.48386	-3.96256	0.327139	0.0590851	0.999831	0.999319	0.999822	0.999689	0.985985	0.873721	1.12e-10	4.69e-12	1.48e-11	-0.897739	-0.532869	-0.277799	-0.689756	-0.497781	-0.751568	-0.0609894	0.203313	-0.0198975	0.170531	0.047471	0.258063	0.24488	-0.345692	0.0121899	0.0215683
Q819N2									+	+	+	0.152444	-0.216253	0.0203419	-0.135984	-0.259246	0.038243	0.0076402	-0.359572	-1.51163	-1.95561	-1.36244	0.695607	0.000254426	0.999831	0.999319	0.999822	0.999689	0.971684	0.312398	4.33e-08	2.44e-10	9.93e-09	2.55815	2.59916	2.54961	2.3324	1.66483	1.89123	2.9635	2.64785	2.57312	2.60688	2.74125	2.93394	2.79073	2.378	2.45127	2.64284
Q818G8												0.153262	0.640999	0.0724704	0.0117175	-0.0647214	0.0384369	-0.150263	-0.43386	-0.85298	-0.576396	-0.425628	0.702639	0.636144	0.999831	0.999319	0.999822	0.999689	0.642509	0.180558	0.000307418	0.0139524	0.00356812	2.2415	2.25713	2.29914	2.87359	2.44478	2.23026	2.39913	2.59304	2.28071	2.39385	2.65053	2.48248	2.35643	2.30447	2.4906	2.2683
Q81FS3		+							+	+	+	0.119867	-2.26869	-0.0980918	-0.0697269	-0.0392087	0.0385056	0.504312	0.574994	1.42701	1.25393	1.1828	0.839792	7.09e-08	0.999831	0.999319	0.999822	0.999689	0.617831	0.284114	0.00063613	0.00177346	0.0155592	-0.627409	-1.27115	-1.93117	-4.96657	-2.53853	-4.20266	-1.14241	-1.10255	-1.00948	-1.15264	-1.14798	-1.21153	-0.965877	-1.00451	-1.64975	-0.981556
Q81E75											+	-0.0711524	-0.878692	0.0622692	0.0889587	0.156446	0.038545	-0.109651	0.0328891	0.211609	0.903382	1.76208	0.552628	6.31e-05	0.999831	0.999319	0.999822	0.999689	0.9063	0.927191	0.401158	0.00351407	2.1e-05	-2.60612	-2.04889	-2.17798	-3.09951	-3.40477	-3.46367	-1.73374	-1.75947	-2.19143	-1.55517	-1.96335	-1.94274	-2.03347	-1.88589	-1.65491	-2.17799
Q81CB5										+	+	-1.54284	1.05176	0.28755	-0.966612	0.0384846	0.0386912	-0.883337	-0.289717	-1.71963	-2.70418	-4.25842	0.154565	0.540519	0.999831	0.999319	0.999822	0.999689	0.617831	0.941172	0.0515168	0.00283584	7.65e-06	-0.261154	-1.15266	-0.83027	0.646334	2.11233	2.06867	1.27939	1.00734	1.03259	0.51228	2.00548	1.70077	-0.907773	-0.876369	2.04711	0.405497
Q819W8												0.686358	0.485729	-0.022644	-0.00437292	-0.272598	0.0388241	-0.093907	-0.256062	-0.0123367	-0.37768	-0.336898	0.31492	0.770626	0.999831	0.999319	0.999822	0.999689	0.830021	0.647794	0.823462	0.175994	0.0230812	0.840534	0.402285	0.354232	0.593521	-0.363902	0.0531864	0.100414	0.307553	0.0649033	0.0122156	0.325389	0.103896	0.0269728	0.0923634	0.183891	0.178976
Q81DV0									+	+	+	-0.218878	-0.52831	-0.0136572	0.0867723	0.0569477	0.0388451	-0.172695	-0.0194562	-2.29438	-3.17159	-2.61144	0.0810973	5.4e-06	0.999831	0.999319	0.999822	0.999689	0.61306	0.949417	4.29e-11	5.19e-14	2.19e-13	2.0154	2.70753	2.6987	1.77394	1.65345	2.35358	2.96544	3.05084	2.99687	2.96349	2.97021	3.07504	3.09852	3.02023	2.99819	3.1399
Q819D2		+									+	0.25946	-2.6701	-0.0261447	-0.0998262	-0.215251	0.0392246	0.210201	0.321063	0.715654	0.756615	1.01683	0.939319	3.74e-14	0.999831	0.999319	0.999822	0.999689	0.823483	0.213837	0.000920557	0.00043954	0.000453858	-0.220362	-0.78096	-0.692346	-4.04188	-3.36551	-3.78733	-0.626537	-0.517777	-0.392839	-0.609376	-0.533948	-0.435702	-0.728612	-0.613766	-0.65078	-0.703861
Q817C3		+							+	+	+	-0.876837	-3.0511	0.0234763	0.163692	0.122051	0.0393092	0.118634	-0.0453148	-1.43227	-1.44029	-1.57225	0.0251187	5.6e-11	0.999831	0.999319	0.999822	0.999689	0.981289	0.991318	0.000401542	0.000370838	1.83e-05	-1.06835	-0.280615	-0.515763	-3.81939	-3.49029	-1.79019	0.356438	0.457564	0.886677	0.596999	0.517285	0.693385	0.718709	0.628761	0.687759	0.703619
Q812Q8												0.187703	-0.443991	0.163431	0.0944996	-0.113078	0.0394103	-0.0670999	-0.146314	-0.463883	-0.0512867	-0.970318	0.923837	0.0151405	0.999831	0.999319	0.999822	0.999689	0.956446	0.954211	0.342061	0.9534	0.00686996	-0.892721	-1.33818	-1.28525	-1.08715	-2.62142	-2.41502	-0.733486	-1.24976	-1.16112	-0.696486	-1.12167	-0.799356	-0.578458	-1.19794	-1.24099	-0.619909
Q81BD6		+							+	+	+	-0.497648	-1.50348	0.109537	-0.292608	0.50405	0.0397828	0.380405	0.225773	-1.85322	-1.64393	-1.7024	0.379378	0.000299938	0.999831	0.999319	0.999822	0.999689	0.868744	0.834928	0.00153766	0.00445182	0.000904661	-2.8661	-1.95836	-3.05426	-3.94399	-3.47538	-4.1892	-1.85559	-1.91989	-1.6754	-1.68498	-1.79864	-1.60209	-1.05594	-3.14098	-2.28831	-1.34822
Q81J70												0.300777	0.829976	0.0141958	-0.0567894	-0.172548	0.0401688	0.0206795	0.025472	0.446663	0.461145	0.490764	0.990865	0.0304808	0.999831	0.999319	0.999822	0.999689	0.967321	0.768974	0.000360942	0.000191108	0.0206327	3.05655	2.95715	2.84803	3.03554	3.23853	3.4629	3.03164	3.02257	2.84008	2.94525	3.13919	2.88901	2.76687	2.79226	3.00827	2.75755
Q819E6		+								+	+	0.571437	-1.47474	0.234608	-0.183494	0.0450617	0.04017	0.313196	0.269389	-0.764761	-1.59223	-1.42977	0.806239	6.73e-05	0.999831	0.999319	0.999822	0.999689	0.884999	0.737859	0.131973	0.00177468	0.0010326	-0.0531693	-1.62545	-1.35421	-4.57516	-1.87876	-3.42979	-1.23074	-1.56971	-1.0118	-1.08457	-1.15353	-0.833749	-1.58077	-1.57299	-1.36549	-1.17176
Q81J19		+							+			-0.219255	-1.69631	0.133107	-0.123089	0.101668	0.0408548	0.62074	0.750225	1.32174	0.937115	-0.635484	0.31492	4.97e-08	0.999831	0.999319	0.999822	0.999689	0.324692	0.0420591	9.32e-05	0.00219824	0.0120285	3.11009	3.2038	3.18543	0.910307	1.56093	1.88456	3.72536	3.83409	3.53253	3.7633	3.90845	3.85611	3.44205	3.14095	3.98319	3.67359
Q817Z1		+										0.329563	-1.21166	-0.1018	0.133435	-0.0475604	0.0409412	-0.127563	-0.172607	-0.156639	-0.360209	-0.389074	0.994726	5.21e-06	0.999831	0.999319	0.999822	0.999689	0.884999	0.91641	0.801673	0.393895	0.0894739	-0.467205	-0.269156	-0.175996	-3.00385	-0.96857	-2.27596	-0.603537	-0.188357	-0.174257	-0.386353	-0.219485	-0.629149	-0.280669	-0.361259	-0.0804424	-0.201775
Q815L4										+	+	0.245134	0.806022	-0.00561905	0.0396436	-0.0765972	0.0412006	-0.153322	-0.554862	-0.888566	-1.05779	-1.13328	0.895857	0.158577	0.999831	0.999319	0.999822	0.999689	0.617054	0.0395247	9.96e-05	8.33e-06	9.05e-08	3.10337	3.60988	3.71821	4.00525	3.49266	3.90386	3.44823	3.66346	3.51927	3.35188	3.64565	3.65314	3.37702	3.47775	3.7386	3.41517
Q81GH5		+								+		-0.137498	-2.7981	-0.0179049	0.108451	0.0559979	0.0414944	0.0240777	-0.133771	-0.13647	1.06556	0.726379	0.0585991	3.33e-17	0.999831	0.999319	0.999822	0.999689	0.981289	0.873721	0.681469	5.55e-08	0.00126641	2.95531	2.4368	2.70624	0.0809917	-0.231891	-0.444923	3.12808	3.16001	3.15764	3.17679	3.09573	3.15607	3.3823	3.17908	3.05318	3.28664
Q81A21		+								+	+	0.397505	-2.03509	0.0178521	-0.0827198	-0.11385	0.042064	0.0391839	0.0192305	0.636869	1.12928	1.409	0.807551	2.27e-15	0.999831	0.999319	0.999822	0.999689	0.985985	0.834928	5.58e-05	9.95e-09	7.71e-09	3.13878	2.91206	2.65297	0.239344	0.266057	0.188257	2.95161	2.70582	2.78876	2.88455	2.80638	2.84538	2.83878	2.55092	2.6518	2.81348
Q81C19		+							+		+	-0.134268	-1.5538	0.0156225	0.0699902	0.167552	0.0423005	0.219692	-0.0911764	-1.3118	-0.966505	-1.00431	0.556339	2.7e-06	0.999831	0.999319	0.999822	0.999689	0.924184	0.990367	0.00187783	0.0207713	0.00286188	-0.904902	-1.73476	-0.804143	-2.0785	-3.31719	-3.01908	-0.700558	-0.953218	-0.452326	-0.678224	-0.729318	-0.61513	-0.290275	-1.07029	-0.692093	-0.195436
Q81D87									+	+		0.0819747	-0.807659	-0.0171197	0.0668271	-0.156672	0.0423896	-0.00729879	0.0882606	-2.09816	-2.51636	0.578463	0.635092	1.25e-06	0.999831	0.999319	0.999822	0.999689	0.967321	0.785932	2.43e-09	4.67e-11	0.0887855	1.07208	1.08338	1.08413	0.271372	-0.458779	0.0457344	1.31331	1.02705	1.5882	1.1955	1.29657	1.42169	1.49388	1.09005	1.38858	1.35442
Q816X6												0.278037	0.880358	-0.127888	-0.0254072	-0.0542304	0.0432549	0.412179	0.433806	0.932613	0.791979	0.43163	0.939319	0.0249801	0.999831	0.999319	0.999822	0.999689	0.139659	0.00749912	2.3e-07	1.68e-06	0.0953407	1.77327	1.46598	1.54107	1.91457	1.76205	2.19831	1.66171	1.60558	1.61381	1.41652	1.58601	1.53147	1.54788	1.44529	1.65518	1.54884
Q81J48												0.316713	-0.628737	-0.0848363	-0.0186392	-0.0290114	0.0432625	0.0537688	-0.116152	0.28018	0.0271931	-0.024615	0.997984	1.69e-08	0.999831	0.999319	0.999822	0.999689	0.992848	0.915956	0.0284194	0.503595	0.193095	4.73616	4.99988	5.1043	3.86369	3.85497	3.57297	4.84748	5.01276	4.96486	4.74242	4.95279	4.91193	4.71471	4.96688	4.93107	4.79803
Q814V2											+	0.114923	-0.4817	0.00453822	0.0697543	-0.0148996	0.0436185	0.316909	0.439898	0.987846	0.871541	1.08115	0.505373	1.94e-07	0.999831	0.999319	0.999822	0.999689	0.373231	0.0100682	2.13e-07	9.4e-07	2.18e-06	2.34404	3.07472	2.89309	1.78371	1.889	2.13691	2.98732	2.97627	2.93838	3.04624	2.94747	2.95843	3.03197	2.85955	3.06319	2.98363
Q814H2		+										0.196077	-1.80894	-0.108701	-0.107515	-0.0808398	0.0436624	0.110837	-0.0624936	0.038833	0.263512	0.326646	0.883049	1.24e-08	0.999831	0.999319	0.999822	0.999689	0.981289	0.998719	0.74845	0.263655	0.64809	1.73816	0.746805	0.966029	-0.296465	-0.907577	-2.07236	1.3355	1.25138	1.21078	1.08316	1.34449	1.08047	1.10675	0.864815	1.34702	1.28373
Q81FN6												-0.77691	0.136548	-0.12657	-0.137152	-0.127106	0.0438925	0.468077	0.547844	0.806798	0.821505	0.441242	0.0475986	0.249959	0.999831	0.999319	0.999822	0.999689	0.617831	0.25217	0.0205049	0.0168484	0.493884	-3.1598	-1.57459	-1.33949	-1.95941	-1.44418	-0.642265	-1.03852	-0.995788	-0.773943	-1.01331	-0.981572	-1.15652	-1.04558	-1.21087	-1.11979	-1.13979
Q818S0									+			0.390373	-0.0193342	-0.16586	-0.0401103	0.0950648	0.0444806	0.476357	-0.68471	2.05663	1.28078	0.100443	0.979294	0.397873	0.999831	0.999319	0.999822	0.999689	0.868757	0.628596	0.00340803	0.050755	0.919793	-1.92533	-4.78732	-2.23001	-3.97803	-4.00019	-2.90593	-2.34914	-3.92898	-2.90077	-2.78595	-3.29434	-3.55961	-2.78316	-3.62346	-3.04912	-3.30986
Q81BR3												0.319876	0.564149	-0.0372435	-0.284751	0.236856	0.0445805	-0.528372	0.045262	-0.86875	-0.615302	0.744453	0.997984	0.977251	0.999831	0.999319	0.999822	0.999689	0.59157	0.949202	0.101276	0.267507	0.252017	-2.1806	-3.68017	-2.99085	-2.55181	-3.73869	-2.54064	-2.95714	-3.72288	-2.19633	-2.89336	-2.75759	-3.30057	-2.7374	-4.06434	-3.08538	-2.70675
Q81G08		+							+	+	+	-0.0597865	-2.73052	0.0651194	0.325732	-0.0511684	0.044857	0.14963	0.303632	-1.56548	-1.72556	-1.74174	0.746024	5.29e-07	0.999831	0.999319	0.999822	0.999689	0.981289	0.764244	0.00661659	0.00301973	0.000761811	-1.45573	-1.41351	-1.44811	-3.38045	-5.58021	-4.08125	-1.1349	-1.11664	-0.951559	-0.81429	-1.31185	-0.845033	-0.51916	-0.823641	-1.03963	-0.843342
Q81FU9		+							+	+	+	0.152031	-1.54807	0.1583	0.247768	-0.572169	0.0448666	-0.254919	0.0482985	-1.84338	-3.18928	-1.95148	0.939319	0.00298084	0.999831	0.999319	0.999822	0.999689	0.923257	0.958782	0.0123794	6.01e-05	0.00321838	-2.12372	-1.99381	-2.1305	-4.44404	-3.52064	-4.09602	-1.75479	-1.93891	-2.07553	-1.76333	-1.72886	-1.76558	-1.82521	-1.84159	-1.51565	-1.64834
Q817M8		+										-1.28741	-1.46996	0.125026	-0.366756	-0.0421308	0.0449066	0.19268	0.156188	0.0206197	-1.14134	-0.939032	0.0701863	0.000997176	0.999831	0.999319	0.999822	0.999689	0.971684	0.900412	0.889555	0.0706357	0.0604087	-3.35243	-2.60398	-4.08415	-2.4713	-4.72245	-4.10683	-1.74897	-1.85799	-1.63647	-1.38468	-1.75566	-1.69145	-1.31058	-3.45994	-1.7297	-1.48599
Q815S2									+	+	+	0.320111	-0.398692	-0.112857	-0.0879765	0.0390784	0.0451825	-0.13376	0.115773	1.12454	1.1196	2.0641	0.996339	3.74e-05	0.999831	0.999319	0.999822	0.999689	0.710039	0.635844	2.27e-06	1.66e-06	6.29e-10	1.37053	1.74232	1.96014	0.610901	0.844266	0.749058	1.46548	1.80832	1.77375	1.49323	1.58119	1.67112	1.22704	1.82931	1.57075	1.55434
Q817H5		+										0.320658	-1.06386	0.0202281	0.0842724	-0.0516993	0.0453281	0.124179	0.113454	0.607031	0.518382	0.263016	0.993001	2.44e-11	0.999831	0.999319	0.999822	0.999689	0.924184	0.468825	8.32e-05	0.000301878	0.600548	2.67987	2.6303	2.4207	1.19808	0.794356	0.872507	2.52427	2.57424	2.60527	2.54097	2.66625	2.5938	2.40941	2.71129	2.67938	2.59044
Q817F8		+							+	+	+	0.372772	-4.78433	0.25475	0.172759	0.0504977	0.045564	0.203078	0.184411	1.12654	2.26335	2.63836	0.925648	2.84e-18	0.999831	0.999319	0.999822	0.999689	0.837458	0.482749	5.18e-06	2.83e-11	1.03e-11	2.73674	2.54276	2.29653	-3.2407	-2.73159	-2.63536	2.67797	2.58646	2.12818	2.72314	2.66593	2.80435	2.72943	2.45257	2.57237	2.5921
Q817B5		+							+	+	+	-0.0226796	-3.96979	-0.17288	-0.1349	0.0654049	0.0456785	-0.14967	-0.475923	1.73421	3.47914	3.5796	0.785018	3.68e-09	0.999831	0.999319	0.999822	0.999689	0.934738	0.7241	0.00196948	3.13e-07	6.87e-07	-0.764851	-0.188828	-0.289495	-4.08904	-2.88845	-6.81938	-0.105497	-0.235192	0.100451	-0.265195	-0.242234	-0.214887	-0.153689	-0.307508	-0.340265	0.00722694
Q814U8												0.396756	0.180506	-0.0713374	0.036541	-0.217505	0.0458145	-0.114725	-0.349555	0.266948	0.377532	0.605453	0.839792	0.0367876	0.999831	0.999319	0.999822	0.999689	0.69478	0.282195	0.0648604	0.013106	0.020386	2.44928	2.56557	2.66901	2.26443	1.94018	2.11815	2.37809	2.56805	2.48235	2.26963	2.56093	2.42047	2.30396	2.55336	2.52426	2.32942
Q81I86		+							+			-0.162354	-1.90132	-0.0402075	0.0802771	0.10408	0.046737	0.216129	0.0954634	-1.39138	0.0659466	0.366881	0.128521	2.13e-12	0.999831	0.999319	0.999822	0.999689	0.789454	0.70193	3.69e-07	0.482423	0.368363	1.68785	1.4238	1.24807	-0.504448	-0.903934	-0.161154	1.98195	1.78062	2.0191	1.79146	1.80965	2.09651	2.2524	1.80214	1.81144	2.20481
Q81AS2		+									+	0.258809	-2.12005	-0.0082105	0.0204277	0.144831	0.0467739	0.0847225	-0.118592	0.0763372	0.918044	1.35465	0.976702	2.41e-07	0.999831	0.999319	0.999822	0.999689	0.985985	0.971067	0.746252	0.0176163	0.00595345	-0.620924	-0.766668	-0.427978	-1.6629	-4.67355	-3.32805	-0.620657	-0.595841	-0.440605	-0.594069	-0.549331	-0.501773	-0.395329	-0.827501	-0.529514	-0.330429
Q813K1		+							+			-0.159893	-3.52074	0.243972	0.155974	-0.223974	0.0472565	-0.471917	-0.00562159	-1.22738	-0.545918	0.0663967	0.311028	3.39e-14	0.999831	0.999319	0.999822	0.999689	0.287094	0.951922	0.000161675	0.0902109	0.700661	1.04718	1.17384	0.929502	-2.14521	-2.88392	-2.61525	1.82178	1.66262	1.0807	1.56428	1.85012	1.91918	1.99028	1.21661	1.6696	1.79786
Q81GU9												0.151537	-0.506741	-0.0804761	0.0904439	0.0435092	0.0476659	-0.0566699	-0.222272	-0.281646	-0.0882123	-0.656293	0.785018	0.000204257	0.999831	0.999319	0.999822	0.999689	0.924184	0.807777	0.428899	0.968725	0.00257322	1.12844	0.990438	1.10746	0.349945	-0.101012	0.290207	1.13989	1.11969	1.44703	1.2057	1.13094	1.1651	1.33189	1.12749	1.36204	1.46747
Q81FR5		+										0.322776	-1.67968	-0.102301	0.0942459	0.0102374	0.0496858	0.0552699	-0.263063	-0.125931	-0.494872	-0.49512	0.99295	1.37e-12	0.999831	0.999319	0.999822	0.999689	0.997888	0.508212	0.761294	0.0234139	0.00056467	2.43883	2.40098	2.26951	0.624044	-0.261533	0.0270767	2.27609	2.39118	2.40862	2.10573	2.37974	2.32009	2.43459	2.33811	2.42941	2.32294
Q81GZ4		+									+	-0.0877005	-2.40208	-0.139417	0.225754	0.0161718	0.0504017	-0.0172666	-0.113134	0.0875765	-0.378245	-1.89714	0.654227	8.75e-08	0.999831	0.999319	0.999822	0.999689	0.981289	0.979638	0.739718	0.486283	2.47e-05	-2.64587	-1.38043	-1.65262	-4.08805	-5.6247	-3.62166	-1.68827	-1.54872	-1.24393	-1.64346	-1.74991	-1.46924	-1.31846	-1.25722	-1.3845	-1.1946
Q81IP0		+							+	+	+	0.103284	-1.45014	-0.0204353	0.0241947	0.040383	0.0506852	-0.0121867	0.134937	1.20787	1.76371	2.4572	0.499115	1.74e-12	0.999831	0.999319	0.999822	0.999689	0.924184	0.451228	2.16e-08	1.32e-11	1.82e-13	3.70432	3.2426	3.38532	2.06512	1.44005	1.45444	3.61486	3.68391	3.65851	3.59393	3.68235	3.65625	3.62228	3.51935	3.7317	3.78797
Q819R4												0.633918	-0.748472	0.0621376	0.0969315	-0.125933	0.0515334	0.0120392	0.413765	0.983309	0.893402	0.796028	0.41644	1.67e-06	0.999831	0.999319	0.999822	0.999689	0.981289	0.113492	4.8e-05	0.0001073	0.00822476	2.73184	2.58034	2.43384	1.55475	1.07399	0.257753	2.36639	2.35014	2.06263	2.29207	2.26383	2.44623	2.22791	2.31539	2.37013	2.36263
Q815E6		+									+	-1.31375	-2.35858	0.0253448	-0.933603	0.261122	0.0515766	-0.173838	-0.411846	-1.54566	-1.58821	-2.29585	0.227841	0.00106985	0.999831	0.999319	0.999822	0.999689	0.9706	0.888891	0.084761	0.0770117	0.00527226	-1.58945	-4.82547	-0.500566	-3.86007	-3.29144	-3.6108	-0.821537	-0.707053	-0.51074	-0.699605	-0.56182	-0.665309	-0.925862	-3.4785	-0.592297	-0.446898
Q819F1		+										-0.377602	-2.2334	-0.0290527	0.214286	0.109353	0.051644	0.266321	0.0486762	-0.766619	-0.935589	-0.729691	0.0361058	8.84e-13	0.999831	0.999319	0.999822	0.999689	0.699498	0.850636	0.00270573	0.000351029	0.000197129	-2.11362	-1.61656	-1.7614	-4.34951	-3.57859	-3.84323	-1.07372	-1.19935	-1.15082	-1.1297	-1.40969	-0.935086	-0.797238	-0.880556	-1.25976	-0.814674
Q818U1		+							+	+	+	-0.287743	-2.54536	0.110635	-0.00866572	0.232002	0.052056	-0.288597	-0.193386	-2.81753	-3.68547	-4.41549	0.171939	1.39e-11	0.999831	0.999319	0.999822	0.999689	0.57995	0.870201	3.64e-10	1.08e-12	7.14e-15	-0.122368	0.56181	0.534705	-2.40974	-2.09637	-2.00495	1.09794	0.837485	0.836842	0.969905	1.01815	1.15268	1.15469	0.588732	0.846327	1.26486
Q81HT9		+							+	+	+	-0.427143	-1.35344	0.0760282	0.212241	0.15492	0.0528049	0.0656001	-0.0594444	-2.98203	-2.5875	-1.52133	0.603371	0.00644654	0.999831	0.999319	0.999822	0.999689	0.997888	0.998719	0.000154837	0.000710374	0.0163979	-0.955643	-2.10314	-1.70306	-2.74933	-3.55262	-1.95115	-0.797247	-0.619948	-1.12833	-0.736466	-0.950782	-0.593629	-0.723567	-0.966522	-0.375235	-0.2824
Q81F60		+							+	+		0.443562	-2.18611	0.033474	-0.0560239	-0.148577	0.0535456	0.186009	0.391885	1.48646	1.15107	0.284681	0.886758	1.24e-08	0.999831	0.999319	0.999822	0.999689	0.939962	0.416056	0.000101497	0.00113205	0.781668	-0.409912	-0.412247	-0.864846	-2.12041	-4.428	-3.73997	-0.618111	-0.898807	-0.565878	-0.533408	-0.655107	-0.757297	-0.809621	-0.95997	-0.6378	-0.869125
Q81GI3									+			0.143005	0.225056	-0.00640424	-0.0537116	0.00951004	0.0538603	0.222819	0.576856	1.07143	0.768608	0.123137	0.631841	0.0503733	0.999831	0.999319	0.999822	0.999689	0.681542	0.00249273	2.08e-07	1.53e-05	0.757002	2.89154	2.78076	2.78172	2.9433	2.65615	2.38837	2.89962	3.03815	3.02214	2.95581	2.98372	3.03772	2.90532	2.82422	2.9127	3.10483
Q81J25		+							+			0.0810153	-2.04469	0.0265477	0.117149	0.100416	0.0540384	0.56758	0.87918	1.20445	0.632872	0.596827	0.695607	3.77e-10	0.999831	0.999319	0.999822	0.999689	0.312567	0.00692467	6.49e-05	0.013106	0.140226	3.33725	4.42605	4.26793	1.13306	2.1037	1.70501	4.03336	4.49956	4.19016	4.3906	4.32513	4.12355	3.85157	4.49625	4.57018	4.21212
Q81G56		+										0.0177339	-2.53636	-0.00626755	0.0497297	0.0260512	0.0549851	0.348901	0.387058	0.606448	0.640694	-0.0792236	0.707374	3.9e-09	0.999831	0.999319	0.999822	0.999689	0.792794	0.45704	0.0754822	0.0578281	0.506318	1.65076	1.54673	1.96266	-1.33858	0.341649	-2.21754	1.97895	1.73468	2.32822	2.19652	1.89053	1.97257	2.18013	1.82142	2.03297	1.90985
Q816F2		+							+	+	+	0.310796	1.91032	0.0796165	0.0648861	0.0293827	0.0556698	0.0377598	-0.76104	-1.42496	-1.38827	-1.09546	0.997984	7.86e-08	0.999831	0.999319	0.999822	0.999689	0.985985	0.00441227	1.37e-07	1.9e-07	3.16e-07	-0.353487	0.0937309	0.0160303	1.32504	1.19251	1.32495	-0.0923824	-0.0489283	-0.0999088	-0.0509138	0.154271	-0.0691652	-0.00919056	-0.323513	0.129618	0.0599976
Q818Z5		+										0.136995	-2.09194	-0.367158	0.0797571	-0.0317847	0.056207	0.128299	0.165504	0.114512	0.388795	0.565165	0.794369	7.48e-10	0.999831	0.999319	0.999822	0.999689	0.971684	0.705191	0.560367	0.113666	0.1954	-0.180807	0	-0.670007	-2.03777	-3.74243	-2.46977	-0.223692	-0.144223	0.0410099	-0.498	-0.542012	-0.351806	0.0782099	-0.0860863	-0.236282	-0.143131
Q815I4												0.430308	-0.995522	-0.0391019	-0.0949955	0.0262438	0.0562592	-0.0217164	-0.186729	-0.00421206	-0.201788	-0.195347	0.729736	1.89e-10	0.999831	0.999319	0.999822	0.999689	0.915364	0.716885	0.719362	0.444661	0.0229324	0.845837	0.71167	0.873498	-0.71023	-0.845016	-1.0036	0.705378	0.64227	0.727327	0.662621	0.607177	0.724433	0.66565	0.484653	0.48316	0.789072
Q817K1												-0.607543	0.449222	-0.137546	-0.0405591	-0.0222632	0.0562725	-0.197666	-0.171876	-0.280869	-0.899602	-0.783704	0.225149	0.836042	0.999831	0.999319	0.999946	0.999689	0.902271	0.949393	0.674879	0.0871586	0.0484247	-2.94406	-3.45763	-2.16064	-1.6008	-2.69622	-1.80738	-1.78591	-1.91237	-2.10653	-2.05473	-2.13624	-1.98991	-2.00967	-2.30194	-1.7714	-2.01761
Q814W2												-0.00841014	-0.506192	0.03549	0.113646	0.0375538	0.0566368	0.0701688	0.146236	0.255902	0.181604	0.365578	0.117694	8.32e-09	0.999831	0.999319	0.999822	0.999689	0.985985	0.289161	0.0187662	0.0548078	0.169297	4.2948	4.4397	4.5268	3.95965	3.49938	3.59657	4.63619	4.80404	4.7812	4.6745	4.82904	4.86092	4.7555	4.81356	4.83678	4.77942
Q817F2												-0.25907	0.328985	0.0833244	0.149861	-0.0539811	0.0570005	0.11032	0.158278	0.364596	0.295938	0.671149	0.0814954	0.301691	0.999831	0.999319	0.999822	0.999689	0.971684	0.565161	0.0523682	0.0897511	0.0282595	0.0775719	0.371042	0.702983	1.13187	0.268884	0.802649	1.01703	0.829751	1.01692	1.07412	0.997436	1.07868	1.05395	0.860483	1.24232	1.07832
Q815J6		+										-0.183372	-2.12168	-0.183898	-0.150806	-0.0553665	0.0576598	-0.208353	-0.422057	-0.892304	-0.440796	-0.103093	0.407479	8.32e-09	0.999831	0.999319	0.999822	0.999689	0.789308	0.537074	0.0175234	0.283141	0.420451	2.61046	3.58514	3.66113	1.75962	0.314858	1.25497	3.75465	3.90584	3.68124	3.37558	3.76924	3.68179	3.44241	3.7312	3.55919	3.46494
Q812J2											+	0.108339	-0.0589485	0.109706	0.0144634	-0.0753231	0.0583979	-0.00623576	-0.084568	-0.999378	0.4558	1.19997	0.631841	0.00349254	0.999831	0.999319	0.999822	0.999689	0.956446	0.980888	5.85e-05	0.010648	1.61e-05	2.10753	1.97115	1.46015	1.74736	1.29364	1.28361	2.20267	1.89161	2.05443	2.21877	2.08078	2.21484	2.17364	1.80429	2.05764	2.17064
Q819U1		+							+			-0.0868009	-2.98181	-0.161538	-0.0170873	0.017451	0.0584017	-0.188306	0.185443	1.03552	0.728176	0.253428	0.541269	2.12e-11	0.999831	0.999319	0.999822	0.999689	0.810331	0.716885	0.00165322	0.0165151	0.835582	-0.121693	-0.449963	-1.36148	-3.83609	-3.91388	-3.58055	-0.00691032	-0.538756	-0.192175	-0.617824	-0.227414	-0.340657	-0.22449	-0.300564	-0.420574	0.0388031
Q81G03		+							+	+	+	-0.0597801	-1.62657	-0.0124709	-0.0853551	0.00917816	0.0585028	0.086586	-0.0981286	-1.37346	-1.36544	-1.06092	0.580082	1.83e-07	0.999831	0.999319	0.999822	0.999689	0.985985	0.979879	0.000311118	0.000328761	0.000521664	-0.141054	-0.0794563	0.0101061	-1.25868	-3.14721	-1.21724	0.325756	0.182357	0.395718	0.34497	0.191836	0.366174	0.372296	-0.0348797	0.153824	0.428413
Q812S1									+	+	+	0.631282	-0.924822	-0.046512	0.169168	-0.0250225	0.0586046	0.280766	0.589231	1.28779	1.13933	1.24121	0.378266	5.79e-08	0.999831	0.999319	0.999822	0.999689	0.630647	0.0122137	3.89e-07	1.66e-06	1.31e-05	1.99368	2.03803	1.88059	0.534243	-0.511991	0.50938	1.59415	1.8153	1.5439	1.57237	1.69553	1.58248	1.73995	1.81406	1.75033	1.81654
Q81I18		+									+	0.154915	-1.20099	-0.122421	-0.247751	-0.144078	0.0586535	-0.0927302	-0.349175	-0.734641	-1.14405	-1.47553	0.939319	0.00514273	0.999831	0.999319	0.999822	0.999689	0.971684	0.868726	0.285349	0.0845532	0.00927174	-0.0800133	-0.286798	-0.515885	-4.46846	-0.498605	-0.695715	-0.278885	-0.0501738	-0.0834904	-0.329907	-0.115306	-0.298038	-0.565305	-0.558487	-0.188534	-0.409573
Q813V0		+							+	+	+	-0.277822	-1.02366	0.0305246	-0.00739987	-0.125939	0.0586828	-0.353537	-0.579231	-2.76012	-3.55793	-4.89526	0.312643	4.74e-05	0.999831	0.999319	0.999822	0.999689	0.595122	0.323655	2.19e-08	1.23e-10	5.93e-14	5.06979	4.86878	4.49026	4.59754	3.5892	3.29224	5.78504	5.06359	5.34858	5.68341	5.39942	5.2425	5.47141	5.08848	5.45858	5.66966
Q815X0									+	+		0.0985476	0.0257994	-0.0424697	0.0100174	-0.102542	0.058953	0.243464	-0.0565929	-1.92596	-2.33942	-0.610052	0.499115	0.0024187	0.999831	0.999319	0.999822	0.999689	0.617831	0.991318	3.55e-11	4.85e-13	3.73e-05	3.23348	3.02183	2.65723	2.66434	2.57284	2.74475	3.25887	3.12376	3.16914	3.11423	3.18111	3.16559	3.29458	3.00517	3.12556	3.12841
Q81GR0		+							+	+	+	-0.0541108	-2.06359	0.237568	0.166657	-0.0402654	0.0592893	0.163027	0.111993	-2.49528	-3.24431	-1.23152	0.608206	1.76e-08	0.999831	0.999319	0.999822	0.999689	0.956446	0.850636	1.08e-07	6.46e-10	0.000213208	0.380014	-0.137398	-0.413686	-1.80693	-2.567	-2.53793	0.701872	0.275075	-0.0507889	0.655282	0.59583	0.424312	0.89235	0.0264626	0.350792	0.701956
Q81FL5		+										-0.0327981	-1.50483	0.0978273	0.0499166	0.0264594	0.0595334	0.127651	0.123962	-0.506283	0.631439	0.612493	0.366886	3.94e-10	0.999831	0.999319	0.999822	0.999689	0.954154	0.656935	0.0503817	0.00237602	0.0551082	0.931034	0.437853	0.711484	-0.601694	-1.1259	-1.32049	1.04458	0.628053	1.44103	1.10328	1.04593	1.29449	1.12163	0.753437	1.23182	1.25848
Q814G7												-0.061924	0.256637	-0.143843	-0.16085	0.0578982	0.0599378	0.478921	0.506953	0.92942	0.430443	0.508757	0.451658	0.268161	0.999831	0.999319	0.999822	0.999689	0.430403	0.117679	0.00071358	0.063238	0.23181	2.08434	1.31152	1.63029	1.77652	1.57427	1.91868	1.98231	1.93051	2.234	1.66941	2.04781	2.03463	1.63614	1.79073	2.08087	1.86815
Q81J39		+							+	+		-0.431737	-1.2077	-0.181955	-0.210606	-0.102816	0.0601184	0.518979	0.67082	1.3731	1.0988	0.640086	0.0422922	4.86e-08	0.999831	0.999319	0.999822	0.999689	0.307027	0.0173501	2e-06	2.88e-05	0.0652511	4.11791	3.84916	4.63344	3.33693	3.23761	2.98575	4.84729	4.89221	5.09113	4.67054	4.86622	4.78455	4.54297	4.48574	5.01357	4.624
Q81IM0		+										-1.16189	-1.96522	-0.305355	-0.470605	-0.461164	0.0605958	0.831879	0.970378	1.25169	1.39293	-0.457787	0.230853	0.00174676	0.999831	0.999319	0.999822	0.999689	0.673735	0.391856	0.0924194	0.0599736	0.426727	-2.06475	-2.67169	-4.39733	-3.05956	-4.38563	-4.81096	-1.46457	-1.35112	-1.89753	-0.525538	-2.37237	-2.69482	-1.79342	-3.72344	-0.764702	-1.59285
Q81BI6									+	+	+	0.190206	-0.42569	0.0384903	-0.0273228	-0.287918	0.0606054	0.227255	-0.421853	-2.72775	-2.193	-2.39764	0.939319	0.0537417	0.999831	0.999319	0.999822	0.999689	0.945902	0.764244	1.27e-05	0.000193961	1.68e-05	-1.64377	-2.08927	-1.86901	-2.69352	-3.12029	-2.34829	-1.60982	-1.71296	-1.915	-1.65561	-1.57324	-1.8569	-1.5749	-2.15883	-1.74254	-1.28181
Q81A17		+										0.0797679	-1.63891	-0.00592804	0.02005	0.0282345	0.0606759	0.174139	0.483678	0.976344	0.798413	0.999013	0.890368	0.00100427	0.999831	0.999319	0.999822	0.999689	0.981289	0.648248	0.103558	0.167095	0.201739	1.24993	0.264099	0.286874	0.322861	-0.446012	-3.94433	0.699471	0.823186	0.973841	0.505481	1.131	0.878793	0.685725	0.706768	1.00763	0.785149
Q81FY7		+										-0.0133851	-1.61639	-0.693911	-0.337827	-0.443449	0.0611299	0.282138	-1.02551	0.457597	-0.321494	1.18243	0.855978	0.00446641	0.999831	0.999319	0.999822	0.999689	0.957004	0.416305	0.503509	0.757138	0.184149	-0.860102	-1.19627	-4.19565	-4.82368	-2.83193	-4.11777	-1.20251	-2.16012	-1.91434	-1.9684	-2.40553	-2.94821	-1.51136	-1.6756	-3.26001	-2.85961
Q818T4												-0.233464	-0.557458	0.0429312	0.0994892	0.0892353	0.0616945	0.166525	-0.0717214	-0.504358	-0.3379	0.928339	0.00734556	4.71e-09	0.999831	0.999319	0.999822	0.999689	0.776876	0.991318	0.00236192	0.0581511	4.29e-06	2.17076	2.02427	2.10453	1.61365	1.34743	1.65415	2.59627	2.66406	2.67452	2.67601	2.64554	2.77865	2.78563	2.60081	2.69035	2.73442
Q81AG7										+	+	0.348942	1.22119	0.247684	-0.445342	-0.214753	0.0617625	0.510134	0.447081	0.766969	1.19758	1.67039	0.987413	0.0792069	0.999831	0.999319	0.999822	0.999689	0.600955	0.409169	0.0364684	0.00204492	0.00047609	-2.69269	-3.58326	-2.60102	-1.68537	-3.43183	-1.85539	-2.70916	-3.40504	-2.8747	-2.69012	-2.62447	-2.89469	-3.45039	-4.13567	-2.89539	-3.17793
Q81J54												0.172909	-0.276901	-0.0265503	0.0409126	0.00650088	0.0622552	0.177375	0.0126387	0.06482	-0.0799135	0.245911	0.753401	0.000218051	0.999831	0.999319	0.999822	0.999689	0.88073	0.901481	0.545024	0.992174	0.765651	1.88204	2.27071	2.49412	1.50076	1.24111	1.84323	2.16604	2.34415	2.55286	2.21104	2.42822	2.3807	2.19261	2.27893	2.55772	2.30245
Q81EG3									+	+	+	0.0080986	0.134284	-0.0043513	0.115663	0.0501321	0.0624027	-0.441696	-1.20083	-2.55087	-2.63375	-2.63641	0.822201	0.463702	0.999831	0.999319	0.999822	0.999689	0.746278	0.149848	0.000127371	7.84e-05	2.35e-05	-1.32046	-2.07055	-1.40111	-1.08235	-2.96237	-1.0812	-1.2117	-1.68155	-0.988272	-1.23325	-1.18388	-1.44089	-1.23288	-1.33373	-1.12445	-1.16403
Q814T7												0.104045	0.752188	0.0473067	0.117779	0.0475286	0.0626958	0.0917867	-0.129258	-0.785423	-0.360769	0.287247	0.412065	0.146475	0.999831	0.999319	0.999822	0.999689	0.971684	0.872423	1.95e-05	0.0513486	0.467716	2.56255	2.63144	2.74472	2.87782	3.18737	3.10559	2.80306	2.77074	2.98767	2.87121	2.93417	2.93458	2.96933	2.82542	2.96354	2.92856
Q81CI7		+							+	+	+	-0.493233	-2.09284	-0.0870686	-0.0574112	-0.0690155	0.062809	0.0654557	0.200877	-2.30536	-3.3829	-2.81119	0.0717739	8.43e-10	0.999831	0.999319	0.999822	0.999689	0.992766	0.628596	3.4e-08	1.57e-11	1.12e-10	1.04448	1.19069	1.10766	0.0445518	-0.65878	-1.55412	2.11158	1.67562	1.97022	2.04891	1.67245	1.81141	1.98384	1.66701	1.77781	1.89395
Q81IX7									+	+	+	-0.286841	0.724055	-0.0794913	0.303981	0.0275224	0.0635618	0.225902	0.159086	1.55755	2.64353	2.91047	0.479451	0.695226	0.999831	0.999319	0.999822	0.999689	0.938357	0.858932	0.000950211	1.23e-06	1.21e-06	-1.36998	-1.94026	-2.96436	-1.27025	-1.68461	-0.999414	-1.12855	-1.26302	-2.08761	-1.74713	-1.22629	-1.70767	-1.14114	-0.685328	-1.89731	-0.774496
Q81JC6									+	+	+	0.243697	0.564533	0.129021	0.126846	0.1375	0.064565	0.264192	0.932789	2.13212	2.27926	2.63287	0.859041	0.924397	0.999831	0.999319	0.999822	0.999689	0.539829	4.33e-06	7.82e-13	8.4e-14	2.09e-14	2.71163	2.61791	2.22273	2.37384	2.53742	2.89115	2.67359	2.65014	2.43234	2.68837	2.77105	2.72027	2.71949	2.56157	2.69903	2.73921
Q816G0										+		0.441061	-0.266771	-0.102856	0.0103315	0.0976156	0.0646744	-0.000349677	-0.239122	0.823482	1.32019	0.734917	0.660054	2.13e-06	0.999831	0.999319	0.999822	0.999689	0.931412	0.453164	8.59e-07	2.24e-10	0.000403203	3.97411	3.94375	3.88798	3.08559	2.74462	3.13977	3.78549	3.69439	3.93766	3.70722	3.71793	3.72039	3.73579	3.72433	3.8319	3.92833
Q81B31		+							+	+	+	-0.881781	-1.85854	-0.0139936	0.0453097	0.0577774	0.0648925	0.0334346	-0.357391	-2.86293	-2.83351	-3.10457	0.035336	3.7e-07	0.999831	0.999319	0.999822	0.999689	0.985985	0.710995	5.23e-08	4.86e-08	2.17e-09	-1.62131	-2.07279	-3.52115	-3.06094	-3.93001	-3.86693	-1.14642	-1.20088	-1.2877	-1.04984	-1.28494	-1.30564	-1.09696	-1.31821	-1.24043	-1.02429
Q815X1		+							+	+	+	-0.317659	-1.68606	-0.0749931	0.135157	0.102673	0.0654825	0.147689	0.0152384	-2.15525	-2.58438	-1.04372	0.0220556	1.74e-12	0.999831	0.999319	0.999822	0.999689	0.915364	0.873721	2.18e-11	3.86e-13	2.1e-07	2.30809	2.16037	2.06413	0.492689	0.175565	1.04677	2.8012	2.69054	2.92872	2.59422	2.79159	2.84623	2.8481	2.87852	2.94279	2.84469
Q81GJ7												0.579993	0.536397	-0.0825113	-0.0189273	-0.26487	0.0657514	-0.208201	-0.799414	-0.552228	-0.558153	-0.607948	0.844756	0.983513	0.999831	0.999319	0.999822	0.999689	0.920629	0.425591	0.417021	0.408253	0.178461	0.546589	0.334705	0.425038	0.917887	1.825	-2.2797	0.156982	0.125466	0.2188	0.111194	0.0202074	0.158875	-0.0481787	0.207903	0.128218	0.04249
Q81JC8								+	+	+		0.205718	-0.521534	-0.0572186	0.0627047	-0.030599	0.0660667	0.569028	1.06014	1.63583	1.59346	0.964858	0.695964	3.55e-09	0.999831	0.999319	0.999822	0.999689	0.00392078	1.33e-08	1.63e-12	9.6e-13	9.82e-07	4.01816	4.00409	3.90369	2.87473	2.92487	3.23222	4.00743	4.15671	4.07952	3.99553	4.07523	4.03782	4.16347	3.98817	4.12363	4.09667
Q81EK6									+	+		-0.0897687	-0.835948	0.102857	0.0580839	0.104216	0.0664965	0.148868	0.113365	-1.71794	-2.18114	0.502054	0.180775	4.76e-08	0.999831	0.999319	0.999822	0.999689	0.920629	0.628596	4.2e-09	2.55e-11	0.100039	2.68999	2.1704	2.09194	1.14565	1.31232	1.54347	2.80904	2.68793	2.65957	2.82927	2.79248	2.87992	2.87987	2.53198	2.76241	3.0121
Q81AQ6											+	0.275962	0.432482	0.0129541	-0.0706838	0.0739931	0.0665404	0.00994047	-0.108543	-0.754283	0.329112	1.11009	0.970366	0.639934	0.999831	0.999319	0.999822	0.999689	0.981289	0.958782	0.00903097	0.109096	0.000678292	0.278849	0.0171814	-0.0390635	-0.447538	-0.376971	0.838682	0.18605	-0.0952101	0.273136	0.295739	0.0520334	0.0916281	0.332311	-0.207739	-0.129171	0.353889
Q814I0		+										-0.228764	-2.26133	-0.107391	-0.0133158	0.0973822	0.0666243	-0.0100352	-0.0127583	-0.997373	0.0229925	-0.407958	0.0775031	1.34e-13	0.999831	0.999319	0.999822	0.999689	0.945902	0.943714	6.07e-05	0.625368	0.00561567	-1.41536	-1.56188	-1.45059	-3.95541	-3.39964	-3.88285	-0.922373	-1.06351	-0.820765	-0.949637	-1.00917	-1.13345	-0.920005	-1.04566	-1.03745	-0.875618
Q819J9												0.368052	0.801736	-0.0681152	0.146749	0.084245	0.0667133	0.0492121	-0.110949	-0.168872	-0.311247	-0.330913	0.847959	0.0386896	0.999831	0.999319	0.999822	0.999689	0.985985	0.900775	0.425473	0.0618643	0.000199623	2.85115	3.21405	3.08735	3.18678	3.31055	3.24391	2.90366	3.05164	3.02798	2.98388	2.92408	2.90754	3.05894	3.0818	3.12626	2.99763
Q819L8		+										0.0784404	-3.73767	0.0425517	0.0708199	-0.0185986	0.0669225	0.136138	-0.247715	-0.417861	-0.400809	-0.94578	0.660054	4.05e-15	0.999831	0.999319	0.999822	0.999689	0.956446	0.757268	0.184209	0.216113	0.000116221	1.12493	0.351318	0.0122252	-2.9699	-4.00271	-3.69961	0.667904	0.754724	0.765421	1.05509	0.656024	0.641147	0.894746	0.710308	0.638929	0.764019
Q81F55										+	+	0.355164	0.620932	0.00619697	0.0889905	0.113682	0.067152	0.111738	0.391039	0.850296	1.11203	2.12962	0.949696	0.743903	0.999831	0.999319	0.999822	0.999689	0.971684	0.134904	0.000235949	7.26e-06	2.01e-09	1.019	0.896896	0.792363	1.41027	0.401898	0.981035	1.11798	0.8789	0.580782	0.846618	0.827798	0.958398	0.868173	1.00142	0.81852	0.946283
Q818U3		+								+		0.489103	-1.90281	0.0555865	0.1443	-0.0901394	0.069006	-0.00484339	-0.217824	-1.33208	-1.85517	-0.952048	0.94014	0.00370718	0.999831	0.999319	0.999822	0.999689	0.985985	0.958782	0.129894	0.0340003	0.176211	0.211796	-1.80769	-1.79732	-4.7274	-2.83159	-3.72233	-1.17438	-1.32575	-1.4255	-1.26369	-0.902223	-1.55639	-1.05143	-1.28646	-1.31136	-1.39542
Q81CC3		+							+	+	+	0.395807	-1.5899	0.134509	0.106689	-0.0178115	0.0695941	0.130424	-0.114974	-1.86934	-2.64751	-1.40448	0.925648	4.85e-08	0.999831	0.999319	0.999822	0.999689	0.971684	0.958782	1.29e-06	2.26e-09	7.62e-06	1.75428	1.41553	1.35986	0.0626049	-1.73877	-0.463648	1.65305	1.40436	1.21972	1.71857	1.44083	1.55782	1.70102	1.25187	1.48778	1.53798
Q815G7										+	+	0.361258	0.277035	-0.0367959	-0.0043513	0.0339743	0.0702546	0.199993	0.31381	0.968015	1.26011	1.15252	0.917598	0.0789449	0.999831	0.999319	0.999822	0.999689	0.720963	0.0654333	3.69e-07	3.09e-09	8.12e-07	1.8656	1.88838	1.79676	1.64209	1.75097	1.19266	1.63567	1.82296	1.94323	1.64263	1.9442	1.74121	1.85629	1.57302	1.80298	1.83168
Q81BR0									+	+	+	0.547943	-0.138433	0.0737031	-0.379192	-0.0940348	0.0706298	-0.245982	-0.964221	-1.22404	-2.38323	-2.14312	0.750764	0.044508	0.999831	0.999319	0.999822	0.999689	0.742717	0.042542	0.00177881	2.26e-07	2.11e-07	2.46344	2.00107	2.20769	1.61691	1.52652	0.757282	2.2385	1.71688	2.00788	1.85512	2.2346	2.13122	1.1414	1.33511	2.19265	1.94884
Q81FW1		+										1.17139	-2.98167	0.0273209	0.0626322	-0.375296	0.0708694	-0.0926793	-0.11457	0.556528	0.565464	0.354266	0.273893	3.13e-08	0.999831	0.999319	0.999822	0.999689	0.956446	0.979879	0.201914	0.180849	0.735461	2.17207	1.89222	1.70649	-2.33272	-1.00221	-4.0658	1.59549	1.12491	0.471107	1.15378	1.17594	0.980309	1.36266	0.947742	0.912481	1.1701
Q819M0		+							+	+	+	0.388679	-1.50576	-0.1042	-0.0707149	-0.108324	0.070926	0.461504	0.631128	1.50592	1.28958	1.11248	0.882274	5.6e-11	0.999831	0.999319	0.999822	0.999689	0.261317	0.00575834	2.03e-08	1.46e-07	4.67e-05	2.96089	2.88737	2.74678	0.938112	0.0836992	1.17755	2.82346	2.70992	2.83053	2.73012	2.64964	2.7081	2.62358	2.68247	2.68918	2.71488
Q813J2		+										0.389119	-1.89927	-0.0499274	-0.232956	-0.160372	0.0713476	0.183536	-0.0983632	-0.755084	-0.377928	0.470939	0.939319	1.05e-08	0.999831	0.999319	0.999822	0.999689	0.931412	0.979879	0.0316027	0.339631	0.366428	-0.489744	-0.933256	-0.706439	-3.45227	-2.28606	-3.96865	-0.593729	-1.19364	-0.57453	-0.642081	-1.08047	-0.752568	-0.631085	-1.1792	-1.40701	-0.659456
Q816Y7		+									+	0.516003	-1.61972	-0.0156409	0.0140991	0.0655314	0.0717379	0.0342204	-0.563241	0.0120729	-0.224899	-1.0852	0.776474	1.71e-07	0.999831	0.999319	0.999822	0.999689	0.985985	0.312398	0.825405	0.659264	0.000395561	2.30083	2.91815	2.64579	-0.642427	0.0488825	1.33879	2.55536	2.09769	2.59861	2.31636	2.44642	2.47852	2.34409	2.30581	2.48753	2.43814
Q81HC5		+							+	+	+	-0.70491	-2.06719	-0.212359	-0.0413297	-0.33985	0.0719967	0.0542876	0.0101986	-1.3971	-2.378	-1.17957	0.158095	2.43e-06	0.999831	0.999319	0.999822	0.999689	0.999533	0.958782	0.00612447	1.89e-05	0.00514589	-1.55952	-1.62782	-2.63391	-4.34211	-3.7965	-2.48183	-0.571283	-1.3612	-0.839149	-1.10645	-1.08677	-1.17893	-0.469907	-1.32208	-1.26015	-1.15861
Q81J91		+									+	0.263081	-1.24614	-0.13239	0.063645	0.0377661	0.0720323	0.258542	0.0196514	0.192081	-0.143537	-1.23588	0.987413	0.00101757	0.999831	0.999319	0.999822	0.999689	0.933145	0.958782	0.641939	0.90616	0.00884251	-0.463779	-0.991642	-0.917048	-0.530426	-3.26527	-3.81679	-0.85973	-0.693788	-0.673302	-1.01092	-0.765828	-0.810681	-0.707704	-0.726135	-0.75857	-0.76301
Q817Q2											+	0.240699	-0.501686	-0.00592041	-0.0166874	0.136836	0.0722294	-0.014775	-0.241877	0.122971	0.745177	1.0701	0.847959	1.57e-07	0.999831	0.999319	0.999822	0.999689	0.920629	0.494368	0.235411	8.44e-06	2.89e-06	2.92745	2.78887	2.73191	1.59827	1.91923	1.99121	2.86102	3.0387	2.7613	2.72627	3.01721	2.93634	2.73897	2.73804	2.97743	2.9215
Q81FN2		+							+	+	+	-0.535775	-3.06531	-0.118987	0.104207	-0.0471859	0.0725574	0.261494	0.567048	1.29016	1.51582	1.12732	0.00135355	4.26e-17	0.999831	0.999319	0.999822	0.999689	0.595738	0.00399693	2.26e-08	7.19e-10	5.44e-06	0.899353	1.29983	1.19926	-1.62348	-1.62691	-1.65214	1.98075	1.85587	2.10404	1.91707	1.73944	1.96375	2.15689	1.87659	2.06327	1.96006
Q81JC4									+	+	+	0.303017	0.459126	-0.104745	-0.0334708	0.0200291	0.0727723	0.197582	-0.159004	2.36397	3.07182	2.98404	0.994726	0.56378	0.999831	0.999319	0.999822	0.999689	0.737526	0.813375	1.04e-13	3.45e-16	1.46e-15	2.19311	2.32708	2.42828	2.59218	1.93472	2.17753	2.3242	2.35292	2.29719	2.10923	2.29073	2.29667	2.32689	2.10918	2.2813	2.23696
Q819N9											+	-0.313416	-0.385596	0.0572173	0.102582	0.0690473	0.0727965	-0.045208	0.338388	0.649236	0.821536	1.1194	0.155593	0.00157372	0.999831	0.999319	0.999822	0.999689	0.941458	0.354173	0.0146583	0.00265127	0.0018742	-2.72042	-3.06267	-3.17238	-2.84922	-3.28909	-3.74606	-2.31553	-2.31885	-2.44594	-2.0273	-2.39089	-2.45392	-2.32199	-2.53144	-2.07567	-2.30129
Q818R0									+	+	+	-1.40935	0.324757	0.0609067	0.206292	-0.178096	0.0732428	0.401919	-0.0433947	-2.39027	-2.52498	-1.91113	0.0775031	0.723757	0.999831	0.999319	0.999822	0.999689	0.902271	0.993863	0.000869243	0.000474091	0.00227589	-3.54383	-2.63652	-4.59117	-1.19357	-1.47915	-3.60886	-1.91971	-1.7373	-1.95159	-1.83238	-1.81291	-1.74402	-1.28236	-1.8863	-1.97758	-1.66537
Q819X7									+	+	+	-0.422459	-0.877652	0.0457389	0.165843	0.0642846	0.0742181	0.10196	-0.105287	-1.72859	-1.87287	-1.33162	0.0752615	7.18e-06	0.999831	0.999319	0.999822	0.999689	0.984135	0.963953	1.12e-06	2.62e-07	4.14e-06	2.57721	3.91766	3.93912	2.96369	3.14986	2.24251	4.15086	4.39994	4.08546	4.17927	4.30243	4.32834	4.26138	4.36545	4.35044	4.12968
Q81CA1		+							+	+	+	-0.0922317	1.71933	0.0219523	-0.081267	-0.120129	0.0743256	-0.219845	-0.654187	-3.15221	-3.4417	-3.2731	0.272584	7.59e-06	0.999831	0.999319	0.999822	0.999689	0.57995	0.0395247	8.22e-13	7.24e-14	2.34e-14	1.10046	1.35072	1.25753	2.70214	2.66681	3.06207	1.62943	1.78066	1.5102	1.65783	1.66568	1.69919	1.31116	1.43454	1.77427	1.65853
Q812R9										+	+	-0.0345338	-0.364674	-0.257576	-0.210611	-0.0953102	0.0745958	-0.661133	-0.175906	-0.539531	-1.38458	-1.60342	0.822201	0.154896	0.999831	0.999319	0.999822	0.999689	0.62617	0.958782	0.492615	0.0499746	0.009023	-3.19215	-2.36592	-2.2772	-3.32786	-2.51296	-3.69723	-2.81449	-1.35958	-2.62271	-3.1244	-2.15307	-2.25548	-3.38234	-2.24448	-1.95832	-2.60474
Q81DR8		+							+	+		-0.186422	-1.90029	-0.0226542	0.156633	0.166822	0.0752983	0.14433	-0.0202045	-1.90195	-2.09453	0.481719	0.0335611	9.59e-15	0.999831	0.999319	0.999822	0.999689	0.884999	0.93981	1.22e-11	9.48e-13	0.0569112	2.22233	2.50796	2.44046	0.38582	0.54968	0.38131	2.91966	2.82964	2.91562	2.94169	2.86218	2.82965	3.16246	2.92228	2.89355	3.08999
Q81J38									+	+		-0.729162	0.201014	0.00355911	-0.542338	-0.5753	0.0753663	-0.0496553	0.733949	1.7562	1.01226	-0.0584672	0.0775031	0.35886	0.999831	0.999319	0.999822	0.999689	0.970559	0.128373	4.62e-05	0.00689246	0.56028	3.34987	2.10001	1.69973	3.09171	2.93685	3.19922	3.83874	3.13531	3.29795	3.34653	3.4772	3.49552	2.80515	2.27461	3.4087	3.16452
Q812X7												0.361178	-0.170629	0.0219936	0.0463327	0.0538057	0.0754954	0.0718454	-0.0162156	0.22334	-0.0455659	-0.0310154	0.883049	3.37e-06	0.999831	0.999319	0.999822	0.999689	0.985985	0.902074	0.0297679	0.818718	0.113105	4.19404	4.1243	4.13461	3.68983	3.20835	3.247	4.05439	4.12078	4.12914	4.00184	4.17054	4.23447	3.99384	4.11198	4.18096	4.01378
Q812T2		+								+	+	-0.0635077	-4.84741	-0.00368564	0.0238921	0.0500234	0.0760657	-0.0417334	-0.231972	-0.903432	-1.12755	-1.21079	0.520047	8.15e-16	0.999831	0.999319	0.999822	0.999689	0.947664	0.833391	0.00791347	0.00115274	5.39e-05	1.70491	1.15594	1.3599	-4.3403	-2.59428	-3.90874	1.63576	1.73319	1.97721	1.64799	1.75927	1.96441	1.7341	1.65467	1.87255	1.63593
Q817F7		+										-0.124252	-2.85779	0.00263405	0.0607389	-0.0430622	0.0762088	0.201787	0.0608508	-0.975057	-0.209899	0.704901	0.390687	4.06e-12	0.999831	0.999319	0.999822	0.999689	0.915364	0.876098	0.00313874	0.657765	0.0760102	3.12094	2.89472	2.55973	-0.992582	0.363273	0.291723	3.55354	3.09875	3.23075	3.56589	3.16653	3.19509	3.64433	3.11149	3.15292	3.49215
Q81GI5		+							+	+	+	0.0697937	-3.15962	-0.21879	-0.201244	0.0507609	0.0765349	-0.108156	-0.316513	-2.32526	-3.37038	-3.45553	0.669414	3.01e-13	0.999831	0.999319	0.999822	0.999689	0.873091	0.628596	1.11e-08	5.01e-12	6.45e-13	1.28357	1.31614	0.848756	-1.83145	-3.25517	-1.86553	1.45373	1.28982	1.43043	1.30917	1.01788	1.22712	1.31579	1.01293	1.08501	1.52189
Q818T2											+	-0.16774	-0.599007	-0.0472539	0.146134	0.163359	0.0766233	0.148984	0.00627581	-0.152764	-0.179888	1.25618	0.113326	1.6e-06	0.999831	0.999319	0.999822	0.999689	0.920629	0.906164	0.685568	0.614204	5.44e-06	-0.367155	0.513117	0.361312	-0.761868	-0.519774	-0.217243	0.787086	0.649796	0.508505	0.465762	0.731978	0.642447	0.696912	0.814545	0.715809	0.654839
Q819X0										+	+	-0.0505244	-0.757497	-0.00993475	0.0795994	0.138237	0.0766932	0.241394	0.202815	0.801529	1.61388	2.5328	0.0823687	3.29e-10	0.999831	0.999319	0.999822	0.999689	0.530044	0.166472	8.13e-07	3.12e-12	3.84e-15	2.20399	2.63831	2.64555	1.43133	1.66213	1.56111	2.86275	2.8932	2.81837	2.91866	2.79476	2.86766	2.98061	2.79659	2.87939	3.03006
Q81H08											+	0.190419	-0.165068	-0.341641	0.257328	0.394028	0.0767638	-0.549715	-1.21886	0.727431	0.975344	1.75543	0.94014	0.194487	0.999831	0.999319	0.999822	0.999689	0.630647	0.130154	0.165169	0.0642353	0.00725327	-2.70839	-2.43402	-2.61456	-2.52971	-4.22312	-2.78296	-2.4635	-2.34106	-2.58879	-3.89121	-2.34897	-2.14151	-2.32238	-2.14472	-2.31077	-1.93557
Q81G05										+	+	0.095082	-0.503726	-0.569667	0.150356	0.184902	0.0770168	-0.114879	-0.529675	-0.986298	-1.18122	-1.17792	0.810616	0.00797175	0.999831	0.999319	0.999822	0.999689	0.924184	0.464652	0.0221348	0.00673106	0.00121738	-3.72034	-1.67362	-2.71879	-3.18683	-3.40869	-4.02601	-2.50504	-2.64761	-2.31045	-2.95164	-2.42852	-3.75538	-2.14507	-2.69396	-2.32953	-2.26903
Q81AU6		+										-0.0674197	-3.32941	-0.0333214	0.0893904	0.0323346	0.0770181	0.0986512	0.0660534	-0.796385	-0.824331	-0.618742	0.390642	1.64e-14	0.999831	0.999319	0.999822	0.999689	0.984135	0.850636	0.00578294	0.00464531	0.00279356	-0.107592	-0.108646	0.196509	-3.3039	-3.95678	-3.25738	0.529417	0.370706	0.217302	0.444385	0.47115	0.138488	0.576913	0.0738888	0.57827	0.512909
Q81FR1									+	+	+	-1.21461	0.422557	-0.296144	-0.00576592	-0.296229	0.0779025	0.842644	-0.474017	-3.04658	-2.22634	-2.0138	0.180775	0.865439	0.999831	0.999319	0.999822	0.999689	0.630647	0.83327	0.000246904	0.00491831	0.0043542	-3.59323	-4.24586	-4.26099	-2.81352	-1.51763	-3.56978	-1.90685	-3.93192	-1.68256	-2.81319	-3.32074	-2.23928	-1.16562	-3.25684	-3.2727	-2.12974
Q81JA4		+							+	+	+	0.269075	-3.91174	0.108322	0.114618	0.055638	0.0781358	-0.353647	-0.714869	-2.6017	-3.73651	-3.95586	0.992932	1.37e-07	0.999831	0.999319	0.999822	0.999689	0.861327	0.587533	0.000458996	3.85e-06	6.36e-07	1.17455	0.573313	0.0465345	-4.38822	-2.48325	-4.58894	0.714405	0.244224	0.963434	0.876475	0.626374	0.78074	0.78933	0.480247	0.839813	0.504917
Q81IG2												0.195515	-0.217206	0.060559	-0.025341	-0.0167987	0.0782591	-0.0338624	-0.545858	-0.569418	-0.764821	-0.211641	0.848843	0.00378345	0.999831	0.999319	0.999822	0.999689	0.941744	0.181741	0.0546656	0.00991939	0.136019	-0.226637	0.0377426	-0.188472	-0.178236	-0.580783	-1.56887	0.0328484	0.302463	-0.364328	-0.0248861	0.214513	-0.000405312	-0.0994234	-0.0896187	-0.0725231	-0.321638
Q818B1												0.819998	-0.404271	0.228765	-0.254673	0.370037	0.0788848	-0.175736	0.433245	0.426142	0.647365	-0.701861	0.645046	0.062127	0.999831	0.999319	0.999822	0.999689	0.924184	0.607393	0.356627	0.164078	0.0961538	-1.87529	-2.06539	-2.31506	-3.79991	-2.33642	-4.50457	-3.22946	-2.13498	-2.41639	-2.05207	-2.7763	-2.2296	-2.92915	-3.21981	-2.55242	-1.98327
Q817M2												-0.0142155	-0.983005	0.0281029	0.0842896	-0.103621	0.0788848	0.152525	-0.0891164	-0.0497157	0.158987	0.512719	0.656478	8.44e-05	0.999831	0.999319	0.999822	0.999689	0.97094	0.990434	0.96655	0.507921	0.357672	0.622005	0.45229	0.43439	0.174488	-0.200831	-2.0837	0.926195	1.04636	0.513676	0.78332	0.832873	0.990903	0.850497	0.845766	0.886307	0.616058
Q81IE9		+										0.571948	-3.30164	0.0148354	-0.107592	0.00688489	0.0791346	0.225009	0.0312208	0.759807	0.542594	-0.122807	0.729736	1.45e-11	0.999831	0.999319	0.999822	0.999689	0.920629	0.941172	0.0215957	0.0789738	0.406266	1.18044	0.835194	0.61029	-2.83194	-4.49988	-2.37538	0.557423	0.80116	0.486393	0.653464	0.639003	0.633576	0.446404	0.163868	0.755404	0.64197
Q816N4		+							+	+		0.506598	-1.16974	-1.27236	-0.488868	-0.272667	0.0793139	0.328634	0.0935453	1.3335	1.7197	0.963825	0.865342	0.000575258	0.999831	0.999319	0.999822	0.999689	0.88073	0.915956	0.00452232	0.000427387	0.100613	-0.554716	-0.925772	-0.889039	-1.77964	-3.09176	-3.23949	-1.15272	-1.17515	-0.626553	-1.20293	-2.45257	-3.07945	-0.999135	-1.8581	-1.72032	-1.30698
Q81DE0		+								+	+	0.579521	-1.9282	0.00259527	0.209023	0.0518449	0.0798982	-0.0964387	-0.296104	-0.8714	-3.77781	-3.62314	0.810616	1.06e-05	0.999831	0.999319	0.999822	0.999689	0.955879	0.864665	0.102327	2.18e-08	1.42e-08	-0.590317	-0.280472	-0.161954	-3.15858	-4.31373	-1.79594	-0.775312	-0.578391	-0.482706	-0.576461	-0.708587	-0.507014	-0.553905	-0.411301	-0.400661	-0.627022
Q81E06									+	+		-0.351631	-0.81409	-0.0514666	0.0416177	0.012455	0.0800788	0.193276	0.0145817	-2.54565	-2.18084	-0.745551	0.0885615	6.46e-06	0.999831	0.999319	0.999822	0.999689	0.904201	0.926002	5.52e-10	6.34e-09	0.00089594	-0.696268	-0.556528	-0.241881	-2.0879	-0.73202	-0.774496	0.0301228	0.183888	0.281097	0.0138369	0.177419	0.186015	0.37078	0	0.0926571	0.327269
Q814T2												0.558816	0.197028	0.0416171	0.0157185	0.034776	0.0811418	-0.0582161	0.191618	0.264041	-0.220657	-0.303821	0.580082	0.0987979	0.999831	0.999319	0.999822	0.999689	0.90317	0.470796	0.134902	0.519862	0.0303087	3.80619	3.73403	3.66602	2.98921	2.64722	3.77209	3.43926	3.39899	3.62643	3.45429	3.63105	3.54076	3.33288	3.36473	3.6577	3.53646
Q81DR5		+							+	+		-0.141385	-2.05573	0.0950425	-0.0206471	0.0287501	0.0811653	0.1237	0.0751057	-2.0305	-2.79668	-0.194314	0.154971	8.09e-13	0.999831	0.999319	0.999822	0.999689	0.950181	0.773433	5.52e-10	6.64e-13	0.0735433	3.0609	3.23381	3.28801	1.14268	1.0252	0.959461	3.8221	3.37829	3.74138	3.51577	3.8363	3.9114	3.7858	3.2787	3.6588	3.75175
Q81JD5		+										0.561216	-2.25037	-0.217779	0.0022068	0.0499121	0.0818367	0.108606	0.555875	0.133437	-0.278193	-0.206647	0.776474	6.88e-08	0.999831	0.999319	0.999822	0.999689	0.985985	0.298866	0.638052	0.622303	0.346406	-0.113506	0.357431	-0.434455	-1.66992	-3.53715	-4.13057	-0.328892	-0.409173	-0.20122	-0.424428	-0.85562	-0.27601	-0.431518	-0.281172	-0.376499	-0.471014
Q81G51		+								+	+	0.0670115	1.40697	0.173881	0.162319	0.145822	0.0818736	0.371081	0.223099	-0.429151	-1.05101	-1.57434	0.575035	0.00021183	0.999831	0.999319	0.999822	0.999689	0.473181	0.389226	0.0936985	5.71e-05	5.71e-09	-1.34322	-1.68827	-1.42729	-0.49246	-0.50287	-0.155924	-1.03253	-1.46547	-1.22692	-1.1364	-1.09844	-0.931882	-1.15646	-1.23245	-1.00558	-1.01498
Q81GB8												0.347909	0.0582339	0.0786285	0.237279	-0.285187	0.0819194	0.00367483	-0.103251	0.069533	-0.0712325	-0.619799	0.955932	0.0192711	0.999831	0.999319	0.999822	0.999689	0.971684	0.958782	0.538867	0.974412	0.000483225	1.62944	1.5371	1.52216	0.821146	1.38856	0.897614	1.63854	1.66941	1.27192	1.57493	1.71997	1.55741	1.72284	1.63737	1.77496	1.50744
Q81AY7		+								+	+	-0.251954	-1.27186	-0.253782	0.147753	0.425671	0.0820109	0.152326	-0.0156924	-0.125519	-1.39492	-2.8734	0.648869	0.00288077	0.999831	0.999319	0.999822	0.999689	0.984135	0.988823	0.929601	0.0292837	1.18e-05	-1.60845	-1.7754	-1.35492	-3.06437	-3.32117	-2.1253	-1.06387	-1.31555	-0.668589	-1.69629	-0.86976	-1.20674	-0.846145	-0.957077	-0.958052	-0.690559
Q81GS5										+		1.75637	1.25287	1.26337	0.706271	0.656549	0.0831369	0.731962	0.432549	0.818535	1.42374	0.603939	0.20817	0.320932	0.999831	0.999319	0.999822	0.999689	0.71049	0.772729	0.232031	0.0422674	0.578467	-1.43776	-4.56627	-3.34877	-4.24738	-3.61251	-3.71574	-3.79018	-4.38365	-5.51317	-3.47938	-3.34933	-3.03163	-2.83583	-5.60213	-3.28675	-4.14753
Q815Q0		+										0.138583	-1.16308	-0.00688553	-0.00941531	0.273814	0.0838782	0.163843	0.176706	-0.534686	0.220146	1.01384	0.882274	0.000374836	0.999831	0.999319	0.999822	0.999689	0.971684	0.844787	0.307676	0.513264	0.0683255	-1.02486	-0.94837	-1.1643	-2.94533	-0.9059	-3.90362	-0.704435	-0.991977	-0.921965	-0.339154	-1.10141	-1.1619	-0.655351	-1.25901	-0.888783	-0.299175
Q812X9		+										0.295417	-2.89899	-0.0192471	0.0963268	0.0990257	0.0840569	0.00454966	-0.27849	0.584277	0.372626	-0.685308	0.99295	5.8e-13	0.999831	0.999319	0.999822	0.999689	0.981289	0.694411	0.018008	0.0932572	0.0022967	-1.48315	-0.0978374	-0.426255	-3.95694	-4.01544	-4.33046	-0.684036	-0.438434	-0.836132	-0.773641	-0.659684	-0.546456	-0.691632	-0.436363	-0.698151	-0.483225
Q81JD2								+				-0.391303	-0.60892	0.208456	-0.385104	0.203582	0.084301	-0.620759	-1.26086	-0.332216	-0.389278	-0.680875	0.364295	0.0105754	0.999831	0.999319	0.999822	0.999689	0.454957	0.0366316	0.578091	0.49491	0.0604869	-3.29682	-3.86545	-3.51978	-3.44844	-5.03242	-3.5664	-2.87605	-2.84251	-2.85469	-2.55774	-2.62507	-2.72851	-3.93383	-3.20031	-2.75094	-2.74799
Q81A19		+							+	+	+	-0.911495	-5.25136	-0.144602	0.0455437	0.214984	0.0851549	0.0944246	-0.226241	-1.95674	-1.31698	-1.5298	0.0655898	3.97e-13	0.999831	0.999319	0.999822	0.999689	0.985985	0.902074	0.000138124	0.00681098	0.000401102	1.1255	2.54773	2.55594	-1.58814	-3.96903	-1.94561	3.17086	3.20806	3.51962	3.03711	3.14714	3.31705	3.37134	3.31798	3.18933	3.3247
Q816W7												-0.602002	0.759866	0.00169341	-0.0301186	-0.604226	0.086085	0.334893	0.170858	-0.525687	-0.77216	0.78881	0.31492	0.690023	0.999831	0.999319	0.999822	0.999689	0.906801	0.873721	0.411164	0.19914	0.26795	-4.82177	-3.98612	-4.6763	-4.16226	-2.46101	-3.48767	-4.36151	-3.0837	-3.29808	-3.13087	-3.82623	-3.74455	-3.15035	-3.33458	-4.50524	-4.88513
Q81AH3										+		-0.125137	-0.961391	-0.0225207	-0.0539048	0.114386	0.086167	-0.113523	-0.0390854	0.79888	1.6425	1.08025	0.660611	0.00272819	0.999831	0.999319	0.999822	0.999689	0.941744	0.991318	0.0802683	0.00101563	0.0705475	-1.48382	-3.30947	-3.81242	-3.82309	-4.59603	-3.40772	-2.14281	-2.55378	-2.59881	-2.56007	-2.40907	-2.35727	-2.44603	-2.84353	-2.32409	-2.50962
Q815I3												0.586653	0.371894	0.157584	-0.0825145	-0.143998	0.0870241	-0.0695667	-0.271284	-0.42642	-0.239594	0.346987	0.619199	0.493732	0.999831	0.999319	0.999822	0.999689	0.920629	0.704964	0.179866	0.547982	0.544302	-0.293856	-0.70315	-0.816216	-1.89672	-0.794198	-0.478941	-0.942017	-0.707971	-0.988298	-0.769359	-0.598125	-0.761489	-1.08003	-1.07018	-0.892136	-1.01441
Q81GW6		+										0.0737133	-2.16913	-0.0854206	0.0295626	0.151203	0.0875657	0.000910443	-0.196704	0.0521921	0.169212	-0.219445	0.595471	1.13e-12	0.999831	0.999319	0.999822	0.999689	0.971684	0.806798	0.609344	0.257665	0.0719091	-0.635366	-0.769129	-0.892564	-2.77352	-3.16428	-3.80015	-0.487083	-0.546182	-0.550039	-0.561357	-0.53234	-0.709308	-0.714087	-0.570866	-0.366188	-0.546278
Q817D1									+			0.162409	-0.884375	-0.0632477	0.0556278	0.0991376	0.0876032	0.0482674	-0.277747	-1.02396	-0.139514	0.220814	0.722106	3.74e-08	0.999831	0.999319	0.999822	0.999689	0.990507	0.518842	2.91e-05	0.768552	0.846515	2.496	2.49098	2.60992	1.79453	1.03538	0.914284	2.7465	2.50906	2.78901	2.62454	2.55334	2.71352	2.72998	2.57221	2.75274	2.74104
P0C0A4									+	+	+	-0.145913	-0.971185	-0.0380561	-0.134053	-0.0806611	0.0878092	-0.206531	-0.0601273	-1.05234	-2.20629	-2.03504	0.57392	0.000362567	0.999831	0.999319	0.999822	0.999689	0.838938	0.998719	0.016124	6.26e-06	3.81e-06	-1.8861	-2.15957	-2.1544	-3.8756	-2.16809	-3.34456	-1.46346	-1.8249	-1.53908	-1.54615	-1.63392	-1.72497	-1.38606	-2.12746	-1.8726	-1.45033
Q81BC0		+										0.118409	-2.6273	-0.124399	-0.0197214	-0.0546347	0.0889905	-0.0268161	-0.376158	0.00369771	0.73138	0.255594	0.669414	6.72e-14	0.999831	0.999319	0.999822	0.999689	0.934738	0.359471	0.76994	0.00070837	0.749947	1.76657	1.83004	1.78702	-0.416929	-1.73346	-1.41546	2.15473	1.90246	1.90611	1.89982	1.79804	1.92881	2.15084	1.93038	1.6664	2.04367
Q814F7		+							+	+		0.848644	-1.92134	0.00382297	-0.0442702	0.0274626	0.0899467	0.0557563	0.221691	1.29501	1.05786	1.03495	0.648869	7.47e-05	0.999831	0.999319	0.999822	0.999689	0.999859	0.851826	0.0185774	0.0464147	0.134247	1.68209	1.43378	1.24506	-0.485149	-0.222445	-3.95377	1.05568	0.902787	0.79143	1.05385	0.88358	0.860499	0.877822	0.662666	0.920073	0.888075
Q818J9		+							+	+	+	-0.309313	-3.62875	-0.100562	-0.194592	0.0266476	0.0900351	-0.0250301	-0.327449	-1.98466	-1.8256	-1.44464	0.451658	3.84e-10	0.999831	0.999319	0.999822	0.999689	0.981289	0.819387	0.000143845	0.000357991	0.000805627	0.297892	-0.528458	-0.619224	-4.78874	-4.4459	-2.28583	0.481333	0.174907	0.356806	0.191451	0.246936	0.309533	0.508725	-0.357565	0.121584	0.40007
Q81J78									+	+		-0.519625	-0.0897738	-0.261691	0.227049	0.291291	0.0903371	0.0344899	0.139356	2.47272	2.71669	0.8181	0.492475	0.30879	0.999831	0.999319	0.999822	0.999689	0.991494	0.920088	0.000349584	0.00010505	0.335046	-3.72239	-4.01713	-2.86683	-3.06974	-3.5631	-3.39632	-2.7929	-2.73018	-2.58951	-2.66535	-2.53419	-3.66156	-1.90326	-3.15398	-2.53072	-2.41807
Q817L6		+							+	+		-0.254843	-1.09987	0.0417773	0.101795	0.0318362	0.0905717	0.250863	-0.0280806	-1.52869	-1.29637	-0.0892207	0.0649707	5.35e-09	0.999831	0.999319	0.999822	0.999689	0.699498	0.958782	8.17e-08	1.2e-06	0.193078	1.71332	2.54791	2.29447	1.30791	1.13506	0.86529	2.92466	2.70369	2.62678	2.72058	2.7943	2.90214	3.12597	2.64432	2.63369	2.86817
Q819Q2									+			0.320553	0.665905	-0.146126	0.13416	0.0750275	0.0918973	0.325025	0.510392	1.06079	0.840185	0.529942	0.99295	0.413296	0.999831	0.999319	0.999822	0.999689	0.312249	0.00185307	2.53e-08	5.47e-07	0.019621	0.625427	0.756088	0.742763	0.829351	0.750016	0.868608	0.752609	0.863683	0.48122	0.608666	0.576684	0.510345	0.870681	0.802317	0.670471	0.763859
Q814Y7		+							+	+		-0.550086	-1.47752	-0.258529	-0.0461547	0.0874112	0.0919609	0.0790532	0.0141951	-1.2936	-1.18428	-0.658113	0.00208135	1.89e-11	0.999831	0.999319	0.999822	0.999689	0.985985	0.882602	3.55e-07	1.43e-06	7.54e-05	0.247498	0.50271	0.843352	-0.699001	-0.683845	-0.518246	1.43335	1.27905	1.46632	1.20606	0.97161	1.26202	1.30083	1.2613	1.32159	1.31595
Q812W2												0.649191	0.0585092	0.0486507	0.10371	0.18617	0.0934556	-0.162856	-0.191764	0.499615	0.529477	0.383687	0.345959	0.0200644	0.999831	0.999319	0.999822	0.999689	0.645498	0.807777	0.00990268	0.00572744	0.346798	0.0635948	-0.329184	-0.308671	-0.655207	-1.68399	-0.719469	-0.570271	-0.468764	-0.547903	-0.58394	-0.399915	-0.420569	-0.526702	-0.499027	-0.406605	-0.336536
Q81C43		+							+	+	+	0.761918	-1.34772	-0.408391	-0.836545	-0.232906	0.0935739	-0.163151	0.841582	3.75944	3.97022	4.31658	0.660054	0.00040037	0.999831	0.999319	0.999822	0.999689	0.924184	0.198968	3.01e-08	6.94e-09	5.05e-09	-1.53979	-1.47106	-1.86302	-2.78265	-4.44167	-4.69083	-1.50991	-2.24785	-2.46697	-2.84261	-2.00716	-2.56358	-1.98806	-3.58923	-3.31361	-2.29583
Q81J15		+							+	+	+	1.24148	1.30857	0.175707	0.695146	0.482795	0.0947113	0.678142	0.225931	2.27811	2.74476	1.43713	0.0994997	0.0383927	0.999831	0.999319	0.999822	0.999689	0.370766	0.705191	6.46e-07	2.15e-08	0.00149625	-3.38737	-4.00584	-3.83354	-3.43676	-4.19181	-4.10925	-4.41864	-5.00722	-4.59043	-4.27362	-4.57488	-4.60411	-4.5855	-4.07533	-3.42656	-4.33967
Q817P3												0.130988	0.722605	0.00319608	0.0452455	0.0129045	0.0956459	-0.00265312	-0.37016	-0.375645	-0.683822	-0.0110461	0.747064	0.493997	0.999831	0.999319	0.999822	0.999689	0.971684	0.468758	0.24011	0.0219886	0.478796	-0.272472	1.07508	0.932973	1.25678	0.704688	0.836607	0.581547	1.00187	0.694094	0.632339	0.926587	0.764739	0.509459	0.735216	1.01205	0.664267
Q81IN2												0.385283	-0.586058	0.006972	0.170949	0.0634619	0.0956713	0.0710462	0.156855	0.429259	0.258722	0.240621	0.806239	1.1e-09	0.999831	0.999319	0.999822	0.999689	0.985985	0.232224	0.000449099	0.0112886	0.654359	2.31955	2.64674	2.70546	1.46836	1.33361	1.24339	2.38749	2.66207	2.40123	2.45454	2.54189	2.51184	2.54744	2.66407	2.59561	2.67062
Q81F35												0.758372	1.01524	0.889749	0.127467	0.252657	0.0958414	-0.0212075	0.0260258	-0.676838	-0.265637	-0.658194	0.648869	0.309788	0.999831	0.999319	0.999822	0.999689	0.983599	0.958782	0.203091	0.699277	0.0810116	-3.64316	-3.15213	-3.76364	-3.58061	-4.13463	-2.78546	-3.34276	-4.49457	-4.06182	-2.07901	-3.21224	-3.9021	-3.45857	-4.33615	-3.87856	-3.39446
Q81GY5											+	-0.0561714	0.729331	0.203761	0.161638	-0.0654068	0.0962079	-0.0823161	-0.370345	-0.492932	-0.59995	-1.17977	0.155593	0.268161	0.999831	0.999319	0.999822	0.999689	0.768504	0.193165	0.0135712	0.00296505	6.74e-09	2.17935	2.36329	2.39975	2.9597	2.95728	2.66956	2.77221	2.87626	2.39732	2.79747	2.94933	2.94684	2.74149	2.53083	3.10186	2.77684
Q81DY7									+	+		-0.195746	-0.744315	0.147015	0.0561301	-0.00624784	0.0965551	0.0997086	0.0829309	-1.60467	-1.17468	-0.0508588	0.648869	0.0157827	0.999831	0.999319	0.999822	0.999689	0.985985	0.941172	0.00602803	0.0435288	0.688567	-1.51503	-1.50134	-1.23928	-0.855148	-4.44627	-1.3123	-0.80628	-0.995549	-0.931694	-0.648797	-1.05677	-0.550355	-0.650041	-1.02273	-1.04889	-0.71493
Q81G96		+							+			0.141721	1.67145	-0.0631148	0.219923	0.32902	0.0968908	0.187763	0.0754458	-1.54228	-0.724965	-0.935137	0.706662	7.59e-06	0.999831	0.999319	0.999822	0.999689	0.86975	0.790178	1.75e-07	0.00409935	1.1e-05	0.794436	0.424419	0.451354	1.8392	1.85277	1.85507	0.846783	0.384917	0.94824	0.819068	0.634269	0.573821	0.965493	0.783064	0.934628	1.03034
Q81J13		+							+	+		0.0667699	-3.09992	0.26796	0.188915	0.0223878	0.0988909	0.474557	0.879948	1.36238	1.25016	-0.275314	0.883552	2.55e-06	0.999831	0.999319	0.999822	0.999689	0.848622	0.338349	0.0312845	0.0438445	0.501863	3.67282	3.09827	3.06724	-2.68325	1.43514	0.873999	3.5954	3.78911	3.18841	3.66979	3.88223	3.86134	3.57375	3.66278	3.7466	3.66487
Q81GJ9		+										0.760679	-1.77779	-0.795826	0.196275	0.334124	0.0990957	0.587756	0.108745	0.511356	-0.118856	0.932613	0.76341	0.00123262	0.999831	0.999319	0.999822	0.999689	0.797469	0.94489	0.41829	0.956263	0.284648	-1.22128	-2.22775	-1.51025	-4.23556	-4.73765	-4.31382	-1.83015	-1.76824	-2.70803	-2.49339	-2.09936	-4.06458	-1.95059	-2.1773	-1.74622	-1.62293
Q81G11		+										-0.0508881	-1.69572	0.0561244	0.0289644	0.196151	0.0992101	0.0827255	0.0990302	-0.545444	-0.758562	0.132523	0.451658	1.93e-09	0.999831	0.999319	0.999822	0.999689	0.985985	0.79746	0.071678	0.011776	0.870705	1.09394	1.11553	0.942281	-0.800667	-0.149467	-1.54497	1.17029	1.34765	1.72137	1.48108	1.54567	1.41749	1.72093	1.10906	1.33968	1.78644
Q81GL2		+										-0.487971	-1.03031	-0.0612151	-0.000995	0.124851	0.0997861	0.0777245	0.0659453	0.385834	0.479055	0.385253	0.000657249	4.82e-11	0.999831	0.999319	0.999822	0.999689	0.985985	0.656935	0.00480831	0.000727896	0.184149	2.81881	2.86975	2.66196	2.11986	2.1369	1.75439	3.62438	3.4239	3.70105	3.56312	3.50547	3.53365	3.72127	3.42785	3.4407	3.76157
Q81I25												0.162438	0.0620664	-0.00127347	0.10947	0.0915718	0.0999839	0.0246379	-0.353086	-0.655852	0.0198383	-0.0402997	0.660054	0.00399031	0.999831	0.999319	0.999822	0.999689	0.981289	0.219603	0.000950211	0.561044	0.189524	0.536291	0.965736	0.79304	0.382278	0.310554	0.588764	0.860044	1.11963	0.762976	0.879071	0.884257	1.01206	0.983611	0.863598	1.06733	1.0243
P59701									+	+	+	0.467664	0.632085	-0.038901	0.104115	-0.0410226	0.100123	0.0460447	-0.153924	-1.59895	-1.87595	-1.60434	0.660054	0.626451	0.999831	0.999319	0.999822	0.999689	0.985985	0.850636	2.28e-09	6.73e-11	7.82e-11	3.1903	2.69553	2.76105	2.88864	2.79293	2.74622	2.93662	2.69141	2.55075	2.5895	2.70685	2.8023	2.87084	2.58264	2.88112	2.5964
Q81A68												0.136731	0.525139	-0.194103	0.141364	-0.0231075	0.100836	0.112397	-0.0192216	0.0878677	0.682406	0.856261	0.657584	0.900727	0.999831	0.999319	0.999822	0.999689	0.96099	0.947495	0.43188	0.000259874	0.000904661	0.265409	0.737392	0.307292	0.785374	0.11267	0.864916	0.638048	0.691163	0.505583	0.427962	0.266232	0.594853	0.619622	0.603144	0.879595	0.771494
Q81AF8									+	+	+	0.128872	-0.339434	-0.0551923	0.194096	0.138446	0.10195	-0.162958	-0.761959	-3.25688	-3.72629	-3.17001	0.837779	0.0170804	0.999831	0.999319	0.999822	0.999689	0.876889	0.180558	4.2e-09	2.04e-10	1.05e-09	-0.169138	0.106764	0.183408	-0.677744	-0.385074	-0.933422	0.279221	0.400107	-0.0100155	0.146718	0.337308	0.0562716	0.363065	0.298351	0.433661	0.0260963
Q818F5		+										0.790866	-1.37681	0.263386	0.241622	0.134931	0.103871	0.360906	0.0769196	0.173463	0.315994	0.822713	0.582983	5.05e-05	0.999831	0.999319	0.999822	0.999689	0.820117	0.915956	0.598245	0.35521	0.136479	-0.14871	-1.0947	-0.354615	-3.36668	-4.00542	-1.44131	-0.57176	-1.25205	-1.21192	-0.607423	-0.782571	-0.819015	-0.535499	-0.956026	-0.975861	-0.970743
Q817B1		+										0.325729	-2.33957	-0.0808341	-0.0116882	-0.117158	0.104998	0.197051	0.0984917	0.543882	0.424516	-0.108309	0.997984	0.000768978	0.999831	0.999319	0.999822	0.999689	0.981289	0.954211	0.472463	0.543974	0.743124	0.462145	0.26853	0.431861	-4.38035	1.08356	-4.24891	0.283804	0.368426	0.468012	0.349685	0.196448	0.368169	0.309045	0.200958	0.41865	0.351875
Q816E3										+		0.158428	-0.135738	-0.0671069	0.178467	0.0784728	0.105359	0.0541407	-0.225257	0.563885	1.13399	0.812698	0.648272	9.8e-05	0.999831	0.999319	0.999822	0.999689	0.993961	0.571118	0.000334327	2.15e-08	0.000307878	1.59005	1.50713	1.59814	1.1002	0.967404	1.03286	1.82831	1.63535	1.69127	1.70701	1.60471	1.67845	1.77479	1.64262	2.1164	1.72794
Q819R8								+				0.032945	-0.750071	0.168739	0.12332	0.219275	0.105424	0.64246	1.53877	0.753101	0.282066	0.0278352	0.656478	9.06e-05	0.999831	0.999319	0.999822	0.999689	0.280699	4.92e-05	0.00876588	0.232598	0.634688	-0.860458	-0.269014	-0.449727	-1.45699	-0.754264	-2.42935	-0.221107	-0.0259924	-0.49604	0.0436335	-0.143512	-0.100484	-0.268321	-0.156633	-0.104752	0.274633
Q819W6		+							+			-0.136404	-2.80206	-0.0864894	0.0337664	0.21645	0.106099	0.491091	0.914297	1.06522	0.697426	0.768671	0.304348	5.74e-13	0.999831	0.999319	0.999822	0.999689	0.370766	0.00267305	0.000109746	0.00419803	0.0264803	2.70147	3.68563	3.64586	0.477562	0.180633	0.665424	3.84738	3.91119	3.61849	3.6263	3.78303	3.74483	3.35927	3.9185	4.04407	3.83047
Q814G0									+	+	+	0.863387	-0.159036	0.104458	-0.233365	0.311276	0.106833	0.435527	0.903605	2.01359	2.73944	2.70518	0.453818	0.0765821	0.999831	0.999319	0.999822	0.999689	0.71049	0.068152	1.57e-05	1.18e-07	7.47e-07	-1.37808	-3.14426	-3.12934	-4.09201	-2.88909	-4.4502	-2.87769	-3.5143	-2.91495	-2.96936	-2.77678	-3.21087	-2.9865	-3.59424	-3.58282	-3.06747
Q818J7												-0.171845	0.308933	-0.085638	0.0643959	0.0876859	0.107267	0.0727189	0.116069	-0.939222	-0.734626	-0.0107632	0.0813932	0.184114	0.999831	0.999319	0.999822	0.999689	0.985985	0.594354	4.38e-05	0.000952189	0.316518	-0.810965	-0.0858498	-0.105847	-0.059391	-0.198377	-0.0149155	0.112577	0.0193434	0.315847	0.212897	-0.0749483	0.089467	0.383477	-0.00456047	0.105515	0.197985
Q814P8									+			0.0598933	0.0767523	0.0972818	-0.334518	-0.0533257	0.108064	-0.499705	-0.191033	-1.41519	-0.601724	-0.284248	0.759781	0.203837	0.999831	0.999319	0.999822	0.999689	0.47441	0.915956	0.00101242	0.169528	0.230926	0.840363	0.803257	0.772126	0.754927	-0.312051	1.31109	0.975273	0.689256	1.50643	1.40946	1.35511	0.734799	0.202966	0.787064	1.02085	1.28139
Q81D85		+							+	+	+	0.20925	-1.20415	0.290253	-0.034963	0.119809	0.108444	-0.651074	-0.463101	-1.87949	-2.82009	-4.17796	0.939319	0.00039267	0.999831	0.999319	0.999822	0.999689	0.437894	0.648732	0.000360942	1.36e-06	4.07e-10	4.19962	3.85187	3.67281	2.88728	2.91614	0.968319	4.5164	3.79933	3.71571	4.76991	4.00337	4.16548	4.1136	3.27489	4.38153	4.02762
Q81EG7												-0.505899	-0.573142	0.0727762	-0.170586	-0.0245024	0.108737	-0.815908	-0.0742315	-0.994898	-0.639226	1.12623	0.471041	0.0633922	0.999831	0.999319	0.999843	0.999689	0.48783	0.998719	0.137085	0.363672	0.130356	-2.8148	-3.80134	-4.03554	-2.86541	-4.61068	-4.08968	-2.6271	-2.92507	-2.64692	-2.56894	-2.52993	-2.84532	-1.544	-3.10229	-4.22108	-1.65864
Q812T1		+										0.370691	-1.99253	-0.164368	-0.0210889	-0.00633812	0.109026	-0.0422802	-0.472511	-0.619071	-0.618749	-0.774081	0.939319	2.85e-10	0.999831	0.999319	0.999822	0.999689	0.938357	0.31486	0.0437352	0.0475442	0.000972652	-1.71478	-0.872215	-0.840957	-3.63764	-3.84278	-3.74954	-1.32667	-1.31079	-0.967661	-1.29285	-1.44472	-1.3241	-1.43604	-1.19878	-1.19009	-1.04241
Q817M1											+	0.0923678	0.0374699	-0.0240707	0.146877	0.0170135	0.109067	0.0573902	0.13291	0.23156	0.753026	1.1114	0.392262	0.000935831	0.999831	0.999319	0.999822	0.999689	0.999859	0.389226	0.0459391	2.81e-06	5.07e-07	2.86951	2.69392	2.5957	2.49704	2.36431	2.42073	3.0511	3.01359	2.75224	2.97166	2.90036	2.90925	3.19761	2.99592	2.9075	3.12672
Q816L4												0.476164	0.485292	0.195983	0.119439	0.21031	0.109853	0.0675398	-0.0468674	0.519831	0.358302	0.250223	0.648272	0.703486	0.999831	0.999319	0.999822	0.999689	0.985985	0.979879	0.00136966	0.0130732	0.699482	-0.296137	-0.716434	-0.712216	-1.0717	-0.73244	-0.605619	-0.744085	-0.832318	-0.641981	-0.582021	-0.438685	-0.573169	-0.900962	-0.692093	-0.423538	-0.481617
Q818G4		+							+		+	0.343194	-2.64425	-0.0479107	0.108299	-0.0889467	0.110617	0.114279	-0.102294	-1.03355	-0.998205	-1.06871	0.98497	2.54e-11	0.999831	0.999319	0.999822	0.999689	0.981289	0.973894	0.00236192	0.00339342	0.000177738	-0.336159	-0.274302	-0.430852	-4.06688	-4.21922	-2.4299	-0.310427	-0.331931	-0.493643	-0.441838	-0.319579	-0.481753	-0.236114	-0.381655	-0.349859	-0.454817
Q81A92												0.0279706	-0.649451	0.0386651	0.202312	0.138671	0.110683	0.461709	0.416323	0.322135	0.496177	0.349315	0.620241	8.15e-05	0.999831	0.999319	0.999822	0.999689	0.471774	0.218719	0.163058	0.0398599	0.555878	-0.516361	0.619972	0.322312	0.0396557	-1.16689	-1.19147	0.378466	0.646636	0.251804	0.461215	0.367761	0.600488	0.598771	0.556625	0.571922	0.397297
Q814N8												0.65567	-0.375813	-0.048289	0.0967363	0.19537	0.110962	0.0298227	-0.218148	0.397116	0.10128	-0.607099	0.23308	1.01e-05	0.999831	0.999319	0.999822	0.999689	0.984135	0.658318	0.0133232	0.323593	0.000111349	3.99371	3.64608	3.37969	2.44574	2.38402	2.3829	3.20441	3.4204	3.36255	3.11845	3.29834	3.46226	3.23577	3.49237	3.3929	3.38543
Q817B0									+	+	+	0.472868	0.189807	-0.162949	-0.0290019	0.3222	0.110965	1.1762	0.198995	2.82136	2.58118	1.32621	0.914256	0.469535	0.999831	0.999319	0.999822	0.999689	0.196027	0.848356	3.03e-06	8e-06	0.0266781	-3.0139	-3.77615	-3.85279	-4.18642	-4.58745	-3.43051	-3.57121	-3.86257	-3.69277	-3.20809	-4.53612	-3.83463	-3.865	-3.4497	-4.05538	-3.03049
Q81J57												0.567751	0.794464	0.0135988	-0.199707	0.109895	0.111661	0.135525	-0.146653	0.510646	0.907489	0.760997	0.623688	0.311842	0.999831	0.999319	0.999822	0.999689	0.956446	0.91641	0.0239138	0.000303292	0.023214	0.209473	0.639559	0.139792	0.384146	0.148543	0.423918	0.0310783	0.237542	-0.0481548	0.00869846	0.228566	0.0605593	0.0985231	-0.843203	0.209499	0.0871429
Q814F6		+										0.841858	-1.12184	0.0490723	0.163947	-0.0817572	0.111962	0.3927	0.259989	0.458424	0.195779	0.465343	0.39251	3.15e-05	0.999831	0.999319	0.999822	0.999689	0.703592	0.628596	0.145617	0.445657	0.438729	0.782286	0.530188	0.59821	-0.474836	-1.28434	-2.93359	-0.063942	0.194335	0.189611	0.230083	0.156142	0.117558	0.128289	0.316452	0.210581	0.174065
Q81EK7									+	+		0.0614808	0.324333	-0.135659	0.0551955	0.148286	0.11208	0.139018	-0.0565891	-1.41118	-1.13582	-0.665895	0.609575	0.330592	0.999831	0.999319	0.999822	0.999689	0.941744	0.993863	3.41e-06	7.33e-05	0.000904661	-0.411974	-0.572638	-0.646438	-0.606037	-0.505351	-0.443462	-0.249922	-0.350392	-0.280283	-0.401561	-0.451295	-0.398156	0.044467	-0.487644	-0.428358	0.14571
Q81IT9		+										0.220033	-2.02419	-0.0589733	0.0262553	-0.00287437	0.112282	0.107052	0.130522	0.606431	0.24879	-0.239815	0.815766	1.9e-14	0.999831	0.999319	0.999822	0.999689	0.958943	0.481443	0.000307418	0.0560463	0.0161319	3.12427	3.71044	3.54575	1.2646	1.05151	0.619335	3.51287	3.53046	3.61193	3.41253	3.55038	3.552	3.42996	3.55696	3.59059	3.50961
Q817X3												0.339231	0.519	0.0311896	0.271493	0.211936	0.113133	0.459115	0.458355	0.507138	0.204183	0.511201	0.953296	0.845914	0.999831	0.999319	0.999822	0.999689	0.0932431	0.00680513	0.000610072	0.0685123	0.0348072	0.417027	0.713331	0.812926	0.454447	0.747354	0.568436	0.755583	0.741418	0.363485	0.606967	0.706847	0.676803	0.899945	0.77977	0.838726	0.921124
Q819U3												0.508604	0.223146	0.118652	0.153067	0.000427887	0.113229	0.336226	0.362839	0.83478	-0.0405178	-0.361665	0.695607	0.161194	0.999831	0.999319	0.999822	0.999689	0.595738	0.202879	0.000528029	0.885566	0.0267219	-0.431915	-0.218275	-0.108031	0.00616264	-0.940669	-1.39244	-0.474739	-0.35773	-0.51667	-0.39976	-0.362514	-0.194348	-0.517699	-0.372799	-0.155964	-0.39834
Q81DZ2		+						+	+	+	+	0.898006	-2.39479	0.164775	-0.230244	-0.37158	0.113295	1.18431	2.20309	3.68818	3.54801	2.6614	0.453818	1.23e-07	0.999831	0.999319	0.999822	0.999689	0.0932431	6.47e-05	3.39e-09	3.77e-09	2.5e-06	0.132355	-0.437981	-0.724387	-4.37705	-2.51402	-4.72968	-0.733555	-1.60034	-0.455244	-0.671782	-0.876296	-0.710172	-1.04159	-1.42404	-1.17076	-0.874327
Q81I85									+	+	+	0.603146	-0.655382	0.161631	0.118446	0.148244	0.11484	0.186228	0.278549	1.31086	1.42761	1.2611	0.631841	0.000151303	0.999831	0.999319	0.999822	0.999689	0.924184	0.468825	4.13e-05	1.04e-05	0.000613651	0.358486	-0.153109	-0.0542784	-2.11654	-1.76404	-0.456263	-0.197178	-0.468522	-0.0577431	-0.0483732	-0.214435	0.0608187	-0.114507	-0.23036	-0.179762	-0.0534363
Q81FP4												-0.47722	-0.0123164	-0.224518	-0.0148284	0.415557	0.114897	-0.653713	-1.51007	1.20043	0.99663	0.368804	0.706662	0.566076	0.999831	0.999319	0.999822	0.999689	0.820117	0.340216	0.211168	0.282336	0.863476	-1.35008	-1.54155	-1.80081	-0.615917	-3.83638	0.442211	-0.734018	-1.05514	-0.536722	-1.32746	-0.596906	-1.03851	-0.210927	-1.40948	-0.906483	-0.953888
Q814M2		+							+	+	+	0.0433744	-5.32371	-0.10117	0.116653	0.109817	0.114928	0.246857	-0.0531553	-1.69708	-2.15617	-2.5183	0.751293	3.2e-14	0.999831	0.999319	0.999822	0.999689	0.920629	0.994368	0.000210375	8.09e-06	1.52e-07	2.71491	2.54888	2.42819	-2.86946	-4.21056	-2.04161	3.11288	2.75575	2.62812	2.86855	2.73405	2.62722	3.08154	2.78135	2.82731	2.97098
Q816E4									+	+	+	0.182439	0.552884	0.051047	-0.0299219	0.105531	0.115009	0.0993398	0.438445	1.24374	1.3474	1.50619	0.657584	0.980214	0.999831	0.999319	0.999822	0.999689	0.957233	0.004275	8.24e-10	1.02e-10	3.87e-10	0.719893	0.881813	0.892371	1.08563	0.761645	1.04578	0.849106	0.960937	1.07161	1.07845	0.935981	1.05692	0.782269	0.763767	1.08933	1.0762
Q81J47												0.201873	-0.440283	-0.0626437	0.0169716	0.0432269	0.115191	0.072471	-0.0516491	0.380263	0.15835	-0.303919	0.729736	1.58e-07	0.999831	0.999319	0.999822	0.999689	0.985985	0.986699	0.00409983	0.111384	0.00209736	5.07077	4.8323	4.74039	3.85338	3.96078	4.19048	4.98174	4.95504	5.03596	4.82712	4.99934	4.99492	4.91033	4.94854	5.00826	4.92289
Q817S3									+			1.05273	-0.364083	-0.5167	0.98291	0.989788	0.116011	0.949824	-0.220788	2.14276	1.83814	0.898987	0.741807	0.36623	0.999831	0.999319	0.999822	0.999689	0.747332	0.963953	0.0362491	0.0663595	0.503645	-1.14012	0.0299931	-4.42902	-3.24755	-3.39071	-3.8637	-1.52844	-4.40758	-1.82643	-1.83953	-3.91794	-3.51852	-1.3252	-1.72243	-1.92261	-1.41716
Q817Q4		+										0.429284	-1.74718	0.0365492	0.0209668	-0.128405	0.116497	-0.178666	-0.210194	0.466432	0.954248	0.976788	0.805506	9.81e-12	0.999831	0.999319	0.999822	0.999689	0.604074	0.751299	0.0120753	1.52e-05	0.000384931	1.88016	1.59436	1.60689	-0.505522	-1.35537	-0.299433	1.5284	1.53981	1.66024	1.60562	1.60321	1.66584	1.64512	1.401	1.58871	1.44825
P0A4I3		+										0.714301	-2.23922	0.441612	0.342853	-0.335421	0.116868	0.221111	0.761076	0.421853	1.06271	1.41802	0.781431	0.000100656	0.999831	0.999319	0.999822	0.999689	0.971684	0.425591	0.472482	0.0818277	0.0618181	1.18654	0.475719	0.0439482	-1.23527	-2.9168	-3.71465	0.87326	0.0221128	-0.397173	0.876994	0.621058	0.361547	1.13653	-0.0457649	0.27947	0.946775
Q818H4		+							+	+	+	0.316573	-1.71505	-0.217521	-0.0713247	-0.157738	0.119289	0.176753	-0.672281	-2.93675	-3.02473	-3.08998	0.997984	0.000368041	0.999831	0.999319	0.999822	0.999689	0.981289	0.559153	3.06e-05	1.82e-05	4.4e-06	-0.19021	-0.984058	-1.8061	-3.28495	-3.28591	-3.21674	-1.00127	-1.40532	-0.588604	-1.13092	-1.16081	-1.31946	-0.432206	-1.30462	-1.62887	-0.961645
Q81IZ0		+							+	+	+	-0.115117	-2.56336	0.0372569	0.173591	-0.192193	0.119451	-0.382172	-0.0352688	-1.23093	-2.07996	-1.90929	0.660054	2.25e-07	0.999831	0.999319	0.999822	0.999689	0.711793	0.991318	0.0173659	0.000149434	9.58e-05	-1.30127	-1.46611	-1.03114	-2.36171	-4.86395	-4.62996	-0.751713	-0.619639	-1.14693	-0.761943	-0.80268	-0.805326	-0.445621	-0.962749	-0.745663	-0.656851
Q812X3									+			0.375715	-0.421626	0.0370337	0.0568644	0.0657768	0.120064	0.251898	0.303066	1.08555	0.966872	0.411259	0.939319	0.0013283	0.999831	0.999319	0.999822	0.999689	0.837458	0.425591	0.000313224	0.000796807	0.440879	4.14977	4.50022	4.4158	3.52677	2.92334	3.5113	4.17605	4.32954	4.36794	4.16346	4.51892	4.33881	4.03673	4.25601	4.59485	4.13362
Q817R3											+	0.275899	-0.286592	-0.0405229	0.0110188	-0.0192712	0.121309	-0.00379117	-0.0540333	0.362267	0.784141	1.02737	0.939319	1.47e-06	0.999831	0.999319	0.999822	0.999689	0.924184	0.990367	0.00442671	1.13e-06	1.51e-06	1.72809	1.85067	1.91867	1.15447	0.792897	1.15023	1.79031	1.86959	1.94473	1.82946	1.78935	1.90082	1.92787	1.73987	1.81342	1.88136
Q81DK0												-0.0514094	-0.964034	-0.0392501	-0.178073	-0.224616	0.121431	-0.739205	-0.389241	-0.281158	-0.088405	-0.672708	0.834516	0.0355238	0.999831	0.999319	0.999822	0.999689	0.624643	0.873721	0.785344	0.9884	0.24977	-0.614944	-1.8568	-3.53989	-2.66709	-3.41224	-3.38254	-0.957705	-2.16996	-1.79485	-1.94186	-1.51192	-1.54992	-1.3002	-2.13712	-2.17594	-1.44668
Q81J64		+										0.136356	-2.67715	0.0415287	0.188859	0.0679614	0.121749	0.044412	-0.0971387	0.208588	0.354713	0.20723	0.82317	2.04e-10	0.999831	0.999319	0.999822	0.999689	0.990852	0.981423	0.429539	0.19914	0.941354	0.304018	-0.214834	-0.470271	-2.74279	-4.36669	-2.42447	0.226021	0.128898	-0.21018	0.141908	0.0908842	0.0730944	0.220485	0.155935	0.17837	0.168776
Q81J44		+							+			-0.322304	-3.0478	-0.0694599	-0.0356483	-0.0903784	0.122415	0.523448	0.771309	1.00063	0.753702	0.570246	0.0544705	4.79e-15	0.999831	0.999319	0.999822	0.999689	0.238026	0.00263181	3.08e-05	0.000501409	0.0816415	3.82396	4.21392	4.45565	1.30672	0.856183	1.44178	4.60716	4.89	4.89818	4.47233	4.83333	4.91786	4.3199	4.85922	4.95275	4.62827
Q81BE9											+	-0.558221	-0.761094	0.0109412	-0.527596	0.422122	0.122625	-0.0394065	0.475478	0.318125	-0.149528	-1.11011	0.385812	0.0223777	0.999831	0.999319	0.999822	0.999689	0.98304	0.619054	0.526284	0.906719	0.0284919	-2.26041	-4.49111	-2.99578	-3.1938	-3.69402	-4.18045	-2.33325	-2.67469	-2.12979	-2.25475	-2.2246	-2.589	-2.27069	-4.53935	-2.06702	-1.92957
Q818E4									+			0.579375	-0.407763	-0.0307395	0.00809606	-0.0958996	0.123114	0.544034	0.639311	1.13287	0.821821	0.520719	0.327139	1.23e-06	0.999831	0.999319	0.999822	0.999689	0.0435956	0.000707477	5.03e-08	3.82e-06	0.0397555	1.79926	1.74289	1.64624	0.813183	0.463403	0.238024	1.46063	1.44085	1.48367	1.51195	1.42685	1.39069	1.41852	1.3845	1.44989	1.46138
Q817T8												0.148382	-0.428219	-0.00174777	0.0904013	0.122765	0.12337	0.0493088	-0.0318019	0.27342	0.465112	0.279909	0.661344	5.56e-06	0.999831	0.999319	0.999822	0.999689	0.990507	0.958782	0.0674198	0.00460909	0.605516	1.03427	1.08075	1.1012	0.350868	-0.167586	0.590775	1.23954	1.08068	1.38575	1.13062	1.31454	1.29212	1.16902	1.25167	1.39995	1.27256
Q81EE8												0.00199954	-0.0825561	0.0143738	-0.248802	0.243147	0.124252	0.359261	0.61605	-0.295485	0.64206	0.746388	0.896763	0.462132	0.999831	0.999319	0.999822	0.999689	0.941744	0.70649	0.809615	0.412161	0.534807	-3.39453	-5.4342	-4.25421	-5.27792	-3.70139	-5.06967	-3.418	-4.07725	-4.6588	-3.96631	-3.04362	-5.06444	-3.57012	-5.60022	-3.88664	-4.31438
Q81EA6		+								+	+	0.682919	-2.1362	0.127052	0.0424569	0.200183	0.124391	0.205951	0.0276273	0.778074	2.26382	2.03575	0.556339	1.83e-09	0.999831	0.999319	0.999822	0.999689	0.920629	0.932299	0.00945375	2.89e-08	1.45e-06	1.23596	0.496849	0.600959	-2.47846	-2.71445	-1.64303	0.589067	0.301919	0.328918	0.631371	0.409966	0.596286	0.979901	0.203634	0.0072155	0.631609
Q81HT3								+	+	+	+	-0.070172	-0.602637	0.133429	-0.0510311	-0.199974	0.125558	0.895676	1.26978	1.93424	1.71699	1.27877	0.270979	4.09e-06	0.999831	0.999319	0.999822	0.999689	0.00392078	4.14e-06	6.89e-10	2.97e-09	1.03e-05	0.49889	-0.11133	0.0688944	-0.704741	-0.636727	-0.511829	0.622478	0.14157	0.837816	0.618644	0.542674	0.877395	0.503749	0.293741	0.494757	0.262043
Q81J67									+	+		0.141584	0.115936	0.318185	0.208009	0.129961	0.125668	-0.255302	-0.184764	-1.3536	-1.04576	-0.917894	0.76341	0.0892412	0.999831	0.999319	0.999822	0.999689	0.595	0.868872	2.4e-05	0.000590626	0.000159746	-1.05171	-0.53587	-0.078536	-0.984049	-0.979033	-0.492334	-0.369869	-0.216334	-0.569769	0.00286007	-0.139148	-0.0285673	-0.102933	-0.402115	-0.183422	-0.0901451
Q815J1												0.0647799	0.543648	0.066234	0.0402152	-0.0380548	0.126146	0.0800082	0.0218118	0.514304	0.735339	0.91389	0.391386	0.976279	0.999831	0.999319	0.999822	0.999689	0.98486	0.848356	0.00106505	2.04e-05	8.19e-05	1.33028	1.93408	1.87181	2.21666	1.82431	1.81945	1.87668	2.05063	1.94942	1.96321	2.08556	2.06322	1.81452	1.93958	2.08674	1.82007
Q814W0		+										0.189746	-1.20684	-0.10287	0.0998548	0.181309	0.127834	0.136288	0.241404	0.181828	-0.284796	-0.388258	0.750764	1.35e-10	0.999831	0.999319	0.999822	0.999689	0.924184	0.234857	0.171871	0.249903	0.00272182	2.94662	3.40698	3.39052	1.44812	1.87197	1.52191	3.29373	3.45571	3.36033	3.12055	3.46669	3.25049	3.19561	3.54783	3.50937	3.3114
Q81C48												-0.0705134	-0.389832	-0.0270456	0.0263106	-0.02679	0.128153	0.0274022	0.462989	0.675833	0.391864	0.221323	0.0481412	4.08e-08	0.999831	0.999319	0.999822	0.999689	0.971684	0.00131365	2.96e-06	0.000759614	0.765295	2.28514	2.20244	2.20619	1.73611	1.39097	1.89638	2.59136	2.57296	2.67589	2.50469	2.57703	2.71391	2.55785	2.56835	2.6364	2.58533
Q817X9		+							+	+	+	0.141821	-1.21652	-0.366115	0.196953	0.161368	0.128393	0.396426	0.942117	1.6504	1.21316	1.46891	0.935333	0.00693405	0.999831	0.999319	0.999822	0.999689	0.904201	0.29739	0.0102605	0.0481747	0.0499434	-1.29931	-0.985744	-1.23357	0.0398998	-3.95749	-4.38841	-1.0976	-1.09449	-0.817101	-1.23344	-1.41962	-1.41793	-0.706122	-0.934036	-0.934706	-0.869942
Q81C96		+										0.357781	-3.12407	0.101765	0.221579	0.220357	0.129019	0.027806	-0.0866947	0.31451	-0.389506	-0.487542	0.990865	2.31e-07	0.999831	0.999319	0.999822	0.999689	0.988682	0.991774	0.520195	0.587763	0.243714	-1.67991	0.000354767	1.19381	-4.5194	-2.8543	-4.26997	-0.515299	0.219035	-0.327936	-0.31186	0.215112	-0.185594	-0.477998	0.157812	0.204197	-0.402754
Q81DV8										+	+	0.382829	0.632408	-0.0370248	0.034956	-0.015721	0.129487	0.0105381	-0.179954	0.877533	1.55429	1.69243	0.883049	0.652771	0.999831	0.999319	0.999822	0.999689	0.971684	0.801452	1.86e-05	1.91e-09	7.87e-09	-1.2618	-0.483305	-0.65109	-0.721962	-0.712312	-0.925539	-0.735966	-0.90862	-0.9652	-0.857005	-0.791532	-1.03576	-0.815505	-1.03015	-0.81579	-0.680609
Q817I7												0.252606	-0.193975	-0.0397689	0.149927	0.0726643	0.131762	0.195098	0.174831	0.509449	0.286422	-0.139253	0.930998	0.00111134	0.999831	0.999319	0.999822	0.999689	0.855715	0.508682	0.0107157	0.0950695	0.149584	2.50973	2.62326	2.4427	2.27146	1.10569	2.14645	2.65805	2.53569	2.55903	2.69618	2.47435	2.4995	2.77624	2.58808	2.6817	2.78725
Q814F5		+								+	+	-0.928914	-1.95776	0.459771	0.361949	0.111883	0.132912	0.731347	-0.218157	-0.776294	-1.98536	-1.96643	0.273893	0.00063938	0.999831	0.999319	0.999822	0.999689	0.688284	0.949417	0.315392	0.00782492	0.00326562	-4.3476	-2.27872	-3.76091	-4.90785	-4.81016	-4.46812	-2.23253	-2.11114	-2.32193	-1.91129	-1.26315	-2.07528	-2.00961	-2.07944	-1.64722	-1.35344
Q81G55									+	+		0.416299	-0.319085	-0.00112152	-0.000749587	0.125045	0.133574	0.572365	0.864927	1.22673	1.11301	0.924787	0.858598	0.000735047	0.999831	0.999319	0.999822	0.999689	0.238026	0.00244132	8.87e-06	2.2e-05	0.00356812	-0.983841	-0.542442	-0.458575	-1.00518	-2.00863	-1.88956	-0.595118	-0.757201	-0.946543	-0.791696	-0.869658	-0.60431	-0.628491	-1.13142	-0.697723	-0.4079
Q812N7		+										0.347211	-2.13387	-0.25913	-0.0125205	-0.0849126	0.133582	0.249944	0.131513	0.968107	0.820707	0.749324	0.994726	0.000166333	0.999831	0.999319	0.999822	0.999689	0.958943	0.928986	0.118257	0.169849	0.401231	1.27137	1.11274	0.882155	0.00791931	-4.4187	-0.478533	1.22041	1.04363	0.895489	0.994264	0.86258	0.561862	1.1373	0.892792	0.935354	1.02483
Q819H1												-0.998522	-0.645318	-0.706611	-0.210286	0.172222	0.133649	0.298148	-0.0618591	1.20884	0.817337	-0.571402	0.320345	0.117428	0.999831	0.999319	0.999822	0.999689	0.956446	0.998719	0.106528	0.253598	0.349994	-2.47236	-3.69652	-4.45019	-3.50963	-3.50216	-3.26003	-2.29892	-1.99573	-2.39397	-1.82425	-4.23217	-2.71547	-1.73635	-2.19647	-3.54318	-1.59554
Q81J51		+							+	+		-0.179686	-2.27582	-0.118969	-0.142985	-0.0351588	0.133755	0.557032	0.721767	1.49052	1.05964	0.940089	0.485737	2.39e-08	0.999831	0.999319	0.999822	0.999689	0.530044	0.122934	0.000215673	0.00404321	0.0489189	2.52094	2.75437	2.33807	-0.642691	1.11478	0.140526	2.95366	3.06378	3.06989	2.5949	3.19074	2.98134	2.67484	2.75945	3.06756	2.3287
Q81F39		+							+	+	+	0.485982	-2.35298	0.272681	0.459936	0.425053	0.133951	0.0955435	0.343948	1.02472	1.45066	1.65379	0.820122	8.91e-10	0.999831	0.999319	0.999822	0.999689	0.985985	0.433668	0.00171659	3.97e-05	6.65e-05	-0.567373	-1.16966	-1.10362	-4.0898	-4.3766	-3.60349	-0.819471	-1.56119	-0.983046	-0.964402	-0.595519	-0.94918	-0.522841	-1.0634	-0.554178	-0.394722
Q817A4		+							+			0.138868	-2.48906	0.054184	-0.0241858	0.0809046	0.134328	0.509735	0.65178	1.36964	0.851219	-0.0300515	0.768358	9.78e-12	0.999831	0.999319	0.999822	0.999689	0.371248	0.0383256	9.32e-06	0.00129411	0.457779	3.61561	3.85343	3.21032	0.0345783	1.55117	0.497467	3.85482	3.78756	3.55527	3.74959	3.90094	3.74624	3.52898	3.63789	3.8017	3.61987
Q818G9		+							+	+	+	-0.160769	-3.8622	0.0501029	0.122461	0.257173	0.135001	0.116824	0.023639	-1.78335	-3.45146	-3.8801	0.707537	3.96e-08	0.999831	0.999319	0.999822	0.999689	0.985985	0.965059	0.0068063	3.72e-06	2.15e-07	0.306694	-0.545963	-0.0507364	-3.48583	-4.15846	-4.46237	0.387651	0.552871	0.186672	0.162271	0.690936	0.460858	0.952092	-0.285995	0.671957	0.932375
Q81CE3		+										-0.428399	-1.00744	0.105785	0.102239	0.0825679	0.135824	0.233294	0.0849603	-0.285479	-0.792951	0.346253	0.119467	1.29e-05	0.999831	0.999319	0.999822	0.999689	0.883369	0.863939	0.502448	0.024081	0.61176	-3.61832	-2.67494	-3.10067	-4.4222	-3.87503	-3.54617	-2.31886	-2.31492	-2.54005	-2.31255	-2.1201	-2.38727	-2.57409	-2.39715	-2.05241	-2.55226
Q81HR8									+	+	+	-0.427119	-0.941573	-0.131449	-0.147278	-0.0911528	0.136356	0.0155112	-0.0486526	-2.79843	-3.78967	-3.57384	0.103498	1.32e-05	0.999831	0.999319	0.999822	0.999689	0.984231	0.991318	1.16e-09	1.78e-12	1.35e-12	0.222643	-0.501123	-0.192126	-0.866806	-0.59641	-1.26311	0.76856	0.583201	0.393883	0.318326	0.569964	0.499568	0.71337	-0.1273	0.561214	0.430525
[truncated: 406 more rows]
[truncated: 20 more columns]

## Sheet: Table S2
Table S2. Module
moduleColor	protein ID
black	Q818F0
black	Q814Y7
black	Q815J4
black	Q815U6
black	Q819E8
black	Q819X7
black	Q81EK4
black	Q81G03
black	Q81G13
black	Q812V5
black	Q813Y7
black	Q814T8
black	Q815F1
black	Q815X0
black	Q815X1
black	Q815X2
black	Q817B2
black	Q817L4
black	Q818B0
black	Q818F8
black	Q819B2
black	Q819B4
black	Q819N2
[truncated: 1,159 more rows]

[truncated: 2 more sheets: Table S3, Table S4]
